# Supplementary material for: Opinion: Coordinated development of emission inventories for climate forcers and air pollutants
Source: Copernicus journal article supplement (doi:10.5194/acp-22-13201-2022), 2022-10-14
Supplement: Supplementary file 1 [file acp-22-13201-2022-supplement.zip]

Archive with 2 entries (2 files):
- acp-22-13201-2022-supplement-title-page.pdf
- Supplementary_Tables.xlsx
