# Supplementary material for: Opinion: Coordinated development of emission inventories for climate forcers and air pollutants
Source: Copernicus journal article supplement (doi:10.5194/acp-22-13201-2022), 2022-10-14
Supplement: Supplementary file 1 [file acp-22-13201-2022-supplement.zip › acp-22-13201-2022-supplement-title-page.pdf]

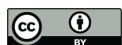

*Supplement of*

## **Opinion: Coordinated development of emission inventories for climate forcers and air pollutants**

**Steven J. Smith et al.**

*Correspondence to:* Steven J. Smith ([ssmith@pnnl.gov](mailto:ssmith@pnnl.gov)) and Erin E. McDuffie ([erin.mcduffie@wustl.edu](mailto:erin.mcduffie@wustl.edu))

- [acp-22-13201-2022-supplement-title-page.pdf](#)
- [Supplementary\\_Tables.xlsx](#)

The copyright of individual parts of the supplement might differ from the article licence.
