# Supplementary material for: Opinion: Coordinated development of emission inventories for climate forcers and air pollutants
Source: Copernicus journal article supplement (doi:10.5194/acp-22-13201-2022), 2022-10-14
Supplement: Supplementary file 1 [file Supplementary_Tables.xlsx]

## Sheet: README
Supplementary Tables 1 and 2
Data used in Figure 2
Reference:	Smith, S.J., E. McDuffie, and C. Charles. "Accounting for Emissions: Inventories for Climate Forcers and Air Pollutants." Atmospheric Chemistry and Physics (submitted)
Data Sources
	Emissions:
	Anthropogenic Emissions
	v2021-02-05 CEDS Aggregate Emissions Data Release; https://doi.org/10.5281/zenodo.4741285 (O'Rourke et al. 2021, Hoesly et al. 2018)
	Open Burning Emissions
	GFED: van Marle et al. (2017)
	(Extracted from gridded data by country using the CEDS country gridding mask.)
	Anthropogenic + open burning emissions (in kt/year) converted to PM-equivalent emissions using conversion factors defined in the main paper appendix
	Health Impacts
	Source: http://ghdx.healthdata.org/gbd-results-tool (downloaded Feb 21, 2021)
	, as documented in GBD 2019 Risk Factor Collaborators (2020).
Data Columns in this spreadsheet
	Column/Var Name	Description
	iso	3-letter country iso code
	country_name	country name
	SDI_category	SDI category (from GMD project)
	appears_on_graph	TRUE if country appears as an individual point on figure 2
	PM-equivalent emissions	See paper appendix for methodology
	Fossil/industrial fraction	Fraction PM-equilvalant emissions from fossil and industrial sources (see below)
	Air pollution DALYs	Disability Adjusted Life Years lost due to air pollution from GMD
	Air pollution deaths	Premature deaths due to air pollution from GMD
	All cause DALYs	Disability Adjusted Life Years lost due to all attributable causes from GMD
	All cause deaths	Premature deaths due to all attributable causes from GMD
Fossil/industrial emissions were defined as all emissions excluding the following:
	Solid biomass CEDS (anthropogenic) emissions across all sectors
	5C_Waste-incineration (CEDS)
	All open burning emissions (forest fires, grassland files, ag waste burning on fields) from GFED
References
	GBD Risk Factor Collaborators 2020. Global burden of 87 risk factors in 204 countries and territories, 1990–2019: a systematic analysis for the Global Burden of Disease Study 2019. The Lancet, 396, 1223-1249.
	Hoesly, R. M., Smith, S. J., Feng, L. Y., Klimont, Z., Janssens-Maenhout, G., Pitkanen, T., Seibert, J. J., Vu, L., Andres, R. J., Bolt, R. M., Bond, T. C., Dawidowski, L., et al. (2018) 'Historical (1750-2014) anthropogenic emissions of reactive gases and aerosols from the Community Emissions Data System (CEDS)', Geoscientific Model Development, 11(1), pp. 369-408
	O'Rourke, P. R, Smith, S. J., Mott, A., Ahsan, H., McDuffie, E. E., Crippa, M., Klimont, S., McDonald, B., Z., Wang, Nicholson, M. B, Feng, L., and Hoesly, R. M. (2021, February 05). Community Emissions Data System (Version Feb-05-2021). Zenodo. http://doi.org/10.5281/zenodo.4509372
	van Marle, M. J. E., Kloster, S., Magi, B. I., Marlon, J. R., Daniau, A.-L., Field, R. D., Arneth, A., Forrest, M., Hantson, S., Kehrwald, N. M., Knorr, W., Lasslop, G., Li, F., Mangeon, S., Yue, C., Kaiser, J. W., and van der Werf, G. R.: Historic global biomass burning emissions for CMIP6 (BB4CMIP) based on merging satellite observations with proxies and fire models (1750–2015), Geosci. Model D…

## Sheet: Figure1-data-by-country
iso	country_name	SDI_category	appears_on_graph	var	1990	1991	1992	1993	1994	1995	1996	1997	1998	1999	2000	2001	2002	2003	2004	2005	2006	2007	2008	2009	2010	2011	2012	2013	2014	2015	2016	2017	2018	2019
afg	Afghanistan	Low SDI	TRUE	PM-equivalent emissions	319.606	310.774	233.951	237.781	243.421	246.128	246.167	235.266	229.214	211.163	207.755	187.29	191.187	196.385	202.352	213.578	227.179	236.8	263.784	351.679	404.633	536.11	492.95	457.293	444.954	515.503	564.808	607.799	778.121	800.955
afg	Afghanistan	Low SDI	TRUE	Fossil/industrial fraction	0.852444	0.843232	0.783841	0.776925	0.773014	0.767369	0.727267	0.70889	0.695693	0.661063	0.648628	0.601196	0.59883	0.60102	0.605446	0.619942	0.638206	0.648612	0.681296	0.758532	0.787387	0.847128	0.832922	0.817543	0.808588	0.83371	0.849	0.85696	0.888336	0.891582
afg	Afghanistan	Low SDI	TRUE	Air pollution DALYs	1.98629e+06	2.06943e+06	2.29851e+06	2.55575e+06	2.70712e+06	2.76567e+06	2.82992e+06	2.89576e+06	2.87393e+06	2.81376e+06	2.74647e+06	2.72314e+06	2.66467e+06	2.76098e+06	2.74109e+06	2.65407e+06	2.54719e+06	2.4318e+06	2.31893e+06	2.22186e+06	2.17268e+06	2.12315e+06	2.07988e+06	2.07102e+06	2.0311e+06	1.98514e+06	1.95017e+06	1.90946e+06	1.86756e+06	1.84917e+06
afg	Afghanistan	Low SDI	TRUE	Air pollution deaths	37231.2	38314.7	41172.4	44487.6	46633.8	47566.4	48616.9	49702.9	49745.7	49348.9	48762.6	48659.8	47732.4	48686.9	48336.8	47107.3	45691.1	44161.3	42696.3	41348.3	40544.5	39893.3	39363.2	39187.1	38711	38227.2	37865.1	37535.1	37160.5	37033.1
afg	Afghanistan	Low SDI	TRUE	All cause DALYs	1.17034e+07	1.25666e+07	1.39844e+07	1.54336e+07	1.66746e+07	1.71007e+07	1.74055e+07	1.80022e+07	1.88771e+07	1.77236e+07	1.75762e+07	1.76643e+07	1.76769e+07	1.73162e+07	1.71571e+07	1.70665e+07	1.69174e+07	1.67515e+07	1.6546e+07	1.63001e+07	1.6269e+07	1.62602e+07	1.63923e+07	1.6421e+07	1.68176e+07	1.71911e+07	1.75446e+07	1.70784e+07	1.72694e+07	1.71174e+07
afg	Afghanistan	Low SDI	TRUE	All cause deaths	182085	192676	208236	225113	241639	246478	250304	258652	272458	256954	256152	257837	256846	250921	248387	246861	245262	243044	239852	236036	234970	234415	235953	235949	241864	247444	252549	245989	254328	251418
alb	Albania	Middle SDI	FALSE	PM-equivalent emissions	143.217	90.6117	57.855	56.7484	59.0141	58.3727	53.564	46.0494	51.3396	71.4001	73.0583	74.0229	82.2862	79.4447	78.2179	71.7075	71.037	64.5323	61.6429	58.0772	58.0305	58.958	55.2527	54.921	57.2613	56.6873	55.5547	57.8115	57.0489	57.3299
alb	Albania	Middle SDI	FALSE	Fossil/industrial fraction	0.896739	0.84745	0.781194	0.787532	0.801686	0.794261	0.781251	0.756179	0.786364	0.813466	0.821702	0.829752	0.855099	0.839739	0.866624	0.86565	0.861095	0.844065	0.838437	0.828029	0.831526	0.837108	0.828782	0.831619	0.844074	0.838417	0.851448	0.866244	0.865649	0.867487
alb	Albania	Middle SDI	FALSE	Air pollution DALYs	106420	109384	105521	100537	93772.5	90380.2	87204.9	84638.6	81903	76783.5	71706.8	66473.9	65432.8	65841.3	63775.3	60775.9	56363.4	52747.8	52212.8	50503.7	49399.9	49465.7	48985.8	48692	48867.8	49042	48716.5	48444	48262.5	48185.2
alb	Albania	Middle SDI	FALSE	Air pollution deaths	2964.75	3037.92	2928.15	2800.33	2632.22	2659.73	2684.94	2685.72	2661.35	2611.03	2536.66	2416.07	2480.89	2595.12	2563.44	2474.16	2314.53	2191.8	2199.26	2149.53	2130.48	2157.04	2161.33	2175.84	2214.39	2248.23	2253.2	2259.83	2267.95	2276.27
alb	Albania	Middle SDI	FALSE	All cause DALYs	959816	974391	957651	938446	910808	896881	888439	1.02468e+06	909886	867673	823000	790301	784488	789702	781034	762414	737401	718108	720260	709997	710876	719042	723237	726361	734879	745475	751314	755879	759410	765715
alb	Albania	Middle SDI	FALSE	All cause deaths	17479.6	17882.2	17387.3	16868.8	16136.4	16353.7	16661.2	18997.9	17208.3	17024.2	16716.8	16232.8	16827.3	17779.1	17954.5	17728.3	17117.9	16740.8	17216.6	17246.3	17623.7	18240.9	18734.4	19264.1	20020.1	20798.5	21280.7	21742.4	22183.3	22670.5
dza	Algeria	Middle SDI	TRUE	PM-equivalent emissions	496.127	506.727	515.872	520.408	505.972	506.049	500.483	491.648	499.775	517.184	527.958	518.492	569.214	563.546	595.444	606.963	613.602	633.028	594.432	609.614	614.767	623.669	634.152	624.858	646.666	673.257	658.304	651.548	662.956	680.838
dza	Algeria	Middle SDI	TRUE	Fossil/industrial fraction	0.664854	0.662182	0.660602	0.654373	0.636334	0.626628	0.614322	0.608055	0.607692	0.614359	0.61513	0.609975	0.643124	0.640593	0.659461	0.666453	0.670348	0.678308	0.659666	0.66802	0.673967	0.681683	0.689123	0.686554	0.701012	0.713996	0.710585	0.710688	0.718134	0.727909
dza	Algeria	Middle SDI	TRUE	Air pollution DALYs	534870	533176	531705	532131	532402	530809	530188	533487	535481	544618	546766	545378	542647	540108	538821	537170	536504	535279	534911	537061	541249	552159	565598	583848	603179	617761	621489	626677	640031	654753
dza	Algeria	Middle SDI	TRUE	Air pollution deaths	14222.8	14437.3	14647.7	14898.8	15168.4	15368.1	15557.7	15817.6	16020.3	16477.9	16634.5	16672.7	16651.1	16587.6	16604.7	16604.6	16651.3	16694.3	16748.2	16922.7	17154.6	17633	18169.8	18803.1	19529.6	20168.1	20399.5	20756.3	21458.6	22161.9
dza	Algeria	Middle SDI	TRUE	All cause DALYs	9.71367e+06	9.56337e+06	9.50474e+06	9.45919e+06	9.51726e+06	9.48033e+06	9.27401e+06	9.4584e+06	9.33056e+06	9.14942e+06	9.20344e+06	9.16256e+06	9.13142e+06	9.20539e+06	9.06718e+06	9.07742e+06	9.11991e+06	9.18149e+06	9.22111e+06	9.2961e+06	9.33607e+06	9.4363e+06	9.51982e+06	9.64042e+06	9.78163e+06	9.87892e+06	9.90936e+06	9.94465e+06	1.00535e+07	1.01221e+07
dza	Algeria	Middle SDI	TRUE	All cause deaths	153630	152797	153350	154074	156555	157222	155056	158740	157266	155713	157024	156932	156887	158359	156751	157657	159131	161152	162731	165261	167095	170454	173601	176985	181573	185863	188439	191819	197041	201111
asm	American Samoa	High-middle SDI	FALSE	PM-equivalent emissions	1.27026	1.33527	1.35388	1.36762	1.36801	1.41054	1.42029	1.41177	1.4891	1.52567	1.46441	1.44683	1.43463	1.4537	1.47627	1.3798	1.33307	1.34403	1.28373	1.23676	1.36484	0.887494	1.13597	1.08121	1.03352	1.0354	1.04179	0.825414	0.839825	0.817792
asm	American Samoa	High-middle SDI	FALSE	Fossil/industrial fraction	0.932658	0.936886	0.936864	0.935401	0.935721	0.937876	0.937646	0.936337	0.935413	0.935049	0.936781	0.935629	0.933885	0.935284	0.934384	0.932363	0.930617	0.932318	0.936837	0.930679	0.937838	0.911345	0.93354	0.932425	0.929092	0.929202	0.931066	0.913993	0.915751	0.913758
asm	American Samoa	High-middle SDI	FALSE	Air pollution DALYs	581.969	573.422	563.881	553.103	544.058	535.535	530.479	527.251	525.33	523.245	512.641	505.462	497.691	487.642	478.986	473.392	474.666	473.703	477.703	481.213	479.548	478.537	474.325	471.285	466.613	466.464	471.521	475.009	473.199	461.177
asm	American Samoa	High-middle SDI	FALSE	Air pollution deaths	15.4161	15.2913	15.1121	14.8751	14.6406	14.4271	14.3333	14.328	14.3446	14.3555	14.1205	13.9887	13.84	13.6347	13.4852	13.4281	13.5848	13.6616	13.868	14.0307	14.0456	14.0873	14.0147	13.9842	13.8667	13.8807	14.0292	14.1345	14.1792	13.8719
asm	American Samoa	High-middle SDI	FALSE	All cause DALYs	12596.8	12976.4	13331.9	13640.4	13971.9	14256.3	14523	14769.8	14982	15136.2	15255.4	15370.1	15462.2	15885	15495	15452.2	15463.3	15440.7	15399.7	17449.3	15398.3	15473.6	15570.8	15819.5	15827.8	15964.4	16133.4	16267	16389.4	16522.5
asm	American Samoa	High-middle SDI	FALSE	All cause deaths	223.736	231.735	239.052	245.205	252.436	259.255	265.925	272.509	278.724	284.028	289.074	294.7	300.471	311.61	309.134	312.46	316.562	319.827	323.582	361.619	330.18	335.975	342.076	350.648	354.611	360.355	366.748	372.285	377.765	383.096
ago	Angola	Low-middle SDI	TRUE	PM-equivalent emissions	2913.28	2893.7	2869.53	2866.46	2827.46	2805.07	2821.98	2834.73	2848.11	2889.05	2920.32	2941.05	2997.39	3022.27	3064.61	3092.08	3122.55	3125.57	3135.73	3119.13	3103.8	3110.88	3140.44	3161.34	3203.69	3210.51	3213.76	3172.08	3182.29	3190.99
ago	Angola	Low-middle SDI	TRUE	Fossil/industrial fraction	0.0235889	0.0246168	0.0237181	0.0245191	0.0258144	0.0255958	0.0269307	0.0274432	0.0257808	0.0294164	0.0297334	0.0311844	0.0316565	0.0391651	0.0397206	0.0360519	0.0435576	0.0500297	0.0565933	0.0611711	0.0655293	0.0671651	0.0754156	0.0811741	0.092872	0.0942948	0.0946264	0.082157	0.085118	0.0876299
ago	Angola	Low-middle SDI	TRUE	Air pollution DALYs	1.39655e+06	1.4132e+06	1.43022e+06	1.45831e+06	1.48027e+06	1.48926e+06	1.4803e+06	1.47473e+06	1.4783e+06	1.47001e+06	1.45551e+06	1.42899e+06	1.39197e+06	1.35875e+06	1.35779e+06	1.31599e+06	1.28075e+06	1.24148e+06	1.19845e+06	1.14409e+06	1.104e+06	1.05083e+06	1.00259e+06	947540	891598	848749	799948	760164	735221	719932
ago	Angola	Low-middle SDI	TRUE	Air pollution deaths	20506.2	20780.4	21074.3	21536.8	21903.4	22062.7	21938.9	21920.4	22098	22116.4	22005.3	21690.4	21252.7	20977.4	21139.7	20632	20308.5	19830.5	19415.2	18852	18450.4	17903.3	17399.2	16745.5	15972.3	15515.1	14973.7	14587.7	14418.8	14384.3
ago	Angola	Low-middle SDI	TRUE	All cause DALYs	1.27305e+07	1.28344e+07	1.3183e+07	1.42141e+07	1.40164e+07	1.40265e+07	1.41811e+07	1.45824e+07	1.5538e+07	1.52559e+07	1.51837e+07	1.52458e+07	1.50701e+07	1.50812e+07	1.5145e+07	1.50467e+07	1.50695e+07	1.47479e+07	1.44813e+07	1.42788e+07	1.40646e+07	1.38843e+07	1.37034e+07	1.34814e+07	1.3184e+07	1.30118e+07	1.29256e+07	1.28021e+07	1.2689e+07	1.25829e+07
ago	Angola	Low-middle SDI	TRUE	All cause deaths	170675	171783	176600	191232	187854	187772	189871	195608	209366	205072	204133	204875	202261	202922	204736	203551	204252	200410	197782	195888	193878	192505	191175	188900	184856	183805	184354	184493	184729	184934
atg	Antigua and Barbuda	High-middle SDI	FALSE	PM-equivalent emissions	2.5524	2.70627	2.72067	2.70388	2.93765	3.02063	3.27799	3.19641	3.25496	3.19859	3.13802	3.27216	3.27143	3.79975	3.78146	3.71051	3.59056	3.65837	3.79087	4.19228	4.36361	3.97706	6.07721	5.61986	5.27491	5.31518	5.32581	3.9944	4.08209	3.96748
atg	Antigua and Barbuda	High-middle SDI	FALSE	Fossil/industrial fraction	0.937877	0.938757	0.936721	0.930455	0.933037	0.936167	0.936977	0.934247	0.92866	0.915597	0.92327	0.926579	0.925182	0.935966	0.932202	0.9375	0.936008	0.938072	0.945302	0.946375	0.94638	0.942803	0.958673	0.955595	0.947433	0.942634	0.945041	0.9314	0.93337	0.931916
atg	Antigua and Barbuda	High-middle SDI	FALSE	Air pollution DALYs	643.392	647.81	657.104	688.591	694.789	704.587	680.52	675.871	672.743	671.611	663.816	657.857	644.952	634.312	625.787	623.734	631.894	677.813	686.496	663.221	675.583	692.073	709.209	732.405	764.664	781.568	773.654	769.186	787.73	820.19
atg	Antigua and Barbuda	High-middle SDI	FALSE	Air pollution deaths	26.071	26.5073	26.8312	28.5975	28.6336	28.7356	26.9792	26.4788	26.1346	25.9246	25.4884	25.1334	24.4351	23.8763	23.4313	23.2882	23.6486	26.2283	26.4171	25.0303	25.413	25.9735	26.4837	27.2976	28.5745	29.2607	28.9378	28.6781	29.3209	30.4959
atg	Antigua and Barbuda	High-middle SDI	FALSE	All cause DALYs	16495.2	16655.2	16978.8	17731.4	18096.2	18580.4	18550.3	19513.1	18988	19332.6	19586.2	19770.5	19901.7	20030.2	20263.7	20400.2	20660.8	21312	21452.8	21270.5	21507.3	21769.8	22009.5	22244.5	22743.4	23065.4	23347.9	23667.1	23906.6	24238.2
atg	Antigua and Barbuda	High-middle SDI	FALSE	All cause deaths	430.514	439.539	446.918	476.883	481.577	487.606	463.742	489.181	457.909	461.516	463.863	463.992	463.271	463.519	467.64	470.173	480.364	529.772	531.851	510.996	516.325	524.408	531.227	537.726	556.135	569.445	580.304	589.258	597.913	609.857
arg	Argentina	High-middle SDI	TRUE	PM-equivalent emissions	1184.89	1206.08	1221.79	1244.07	1315	1340.2	1383.76	1399.56	1411.45	1410.7	1403.52	1353.5	1316.97	1374.18	1483.7	1496.9	1512.09	1507.65	1590.37	1500.42	1551.69	1636.22	1664.06	1624.33	1644.43	1592.74	1534.76	1513.79	1487.34	1473.76
arg	Argentina	High-middle SDI	TRUE	Fossil/industrial fraction	0.656845	0.657969	0.668381	0.666713	0.673742	0.666158	0.671493	0.672869	0.661585	0.658371	0.657577	0.648219	0.642168	0.650634	0.693726	0.705302	0.703698	0.706922	0.730388	0.726395	0.743579	0.755722	0.759352	0.75418	0.753396	0.74746	0.739074	0.733119	0.728931	0.726957
arg	Argentina	High-middle SDI	TRUE	Air pollution DALYs	424231	419326	416791	406551	393626	387965	382684	372947	366964	357932	339016	331627	330210	325193	311299	301999	300344	308687	303850	305729	308323	311898	315302	319641	321346	325741	328752	319089	318359	321181
arg	Argentina	High-middle SDI	TRUE	Air pollution deaths	15551.8	15387.7	15446.5	15187.5	14749.6	14722.5	14607.1	14420.2	14388	14220.6	13503.7	13292.9	13270.6	13168.9	12668.3	12377.9	12381.6	12777.1	12462	12583.2	12889	13162.1	13401	13656	13815.2	14141.6	14357.8	13857.9	13696.8	13777.7
arg	Argentina	High-middle SDI	TRUE	All cause DALYs	1.05507e+07	1.05879e+07	1.06526e+07	1.06319e+07	1.06059e+07	1.06762e+07	1.07901e+07	1.08571e+07	1.09703e+07	1.10122e+07	1.09026e+07	1.09757e+07	1.11515e+07	1.12113e+07	1.10777e+07	1.10116e+07	1.10896e+07	1.13314e+07	1.13546e+07	1.14432e+07	1.15465e+07	1.16507e+07	1.17364e+07	1.18521e+07	1.19047e+07	1.20109e+07	1.22874e+07	1.24102e+07	1.24615e+07	1.25864e+07
arg	Argentina	High-middle SDI	TRUE	All cause deaths	251847	252670	257002	257768	256541	261280	266188	271450	278830	283949	280385	284305	291261	296003	292090	289858	292904	302060	299047	302238	309380	313928	317044	321618	324119	331211	344291	348212	345616	348823
arm	Armenia	High-middle SDI	FALSE	PM-equivalent emissions	147.244	122.08	94.3178	68.6137	48.9001	44.1944	42.6295	41.0743	40.3131	37.9837	38.1103	36.8447	44.2391	47.3295	48.0626	56.0724	52.9743	52.3612	52.0212	50.7541	52.3692	57.7084	62.7461	65.2876	63.0391	68.7199	71.3544	73.5682	78.5369	81.0865
arm	Armenia	High-middle SDI	FALSE	Fossil/industrial fraction	0.937861	0.925084	0.903019	0.867901	0.815852	0.798011	0.79768	0.794351	0.796095	0.786886	0.792017	0.790028	0.827911	0.840057	0.844634	0.866071	0.857285	0.860165	0.858532	0.857744	0.863119	0.876872	0.887419	0.892644	0.89272	0.912122	0.900447	0.900683	0.908218	0.912476
arm	Armenia	High-middle SDI	FALSE	Air pollution DALYs	98905.3	100305	106424	108258	103367	101047	100297	95702.3	93134.2	92461.5	90715.2	91314.2	90789.6	90761.1	89188.7	89442.2	90251.3	88293.4	88418.7	87040.1	85424.3	84518.3	82616.8	79890.6	79254.2	80122.8	78027.9	76116.6	75196.9	74621.2
arm	Armenia	High-middle SDI	FALSE	Air pollution deaths	3163.99	3314.38	3638.47	3786.84	3612.88	3597	3628.24	3495.49	3462.95	3494.27	3477.5	3545.17	3581.48	3627.7	3573.29	3608.73	3665.2	3613.04	3644.03	3594.63	3561.96	3548.29	3498.79	3405.98	3400.6	3469.14	3390.24	3339.46	3310.5	3287.22
arm	Armenia	High-middle SDI	FALSE	All cause DALYs	1.14602e+06	1.14451e+06	1.18415e+06	1.19695e+06	1.15899e+06	1.11213e+06	1.0868e+06	1.04798e+06	1.02342e+06	1.00801e+06	990679	993526	988913	990268	983983	991152	1.00125e+06	988225	992466	985344	977485	969833	955111	931985	927564	937065	935499	925316	923817	922253
arm	Armenia	High-middle SDI	FALSE	All cause deaths	23712.6	24515.2	26542.5	27479.4	26240.3	25630.8	25552.2	24617.6	24355.1	24413.2	24266.6	24834.5	25256.5	25880.9	25932.3	26546.9	27210.8	27103.6	27623.7	27600.4	27756.7	27785.3	27609.5	27034.7	27145.9	27846.2	27835.7	27883.4	27977.3	27978.1
aus	Australia	High SDI	TRUE	PM-equivalent emissions	4556.41	4563.24	4776.35	4800.22	4875.76	4726.37	4763.69	4657.53	4760.59	4950.1	5021.97	4928.58	4986.05	4924.46	4833.85	4685.7	4646.02	4564.17	4500.06	4430.5	4353.28	4372.09	4363.71	4333.67	4377.19	4202.68	4068.04	4008.3	4070.42	4121.38
aus	Australia	High SDI	TRUE	Fossil/industrial fraction	0.560212	0.551854	0.567764	0.567474	0.551934	0.537661	0.514903	0.471717	0.465468	0.477964	0.495124	0.472692	0.481044	0.488853	0.506424	0.523613	0.530117	0.529946	0.558105	0.555411	0.536492	0.53925	0.538733	0.535773	0.540942	0.521933	0.506182	0.498606	0.506756	0.513322
aus	Australia	High SDI	TRUE	Air pollution DALYs	59386.5	57280.1	56416.8	54666.1	54153.4	52924	52425.7	51416.2	50254.8	49084.3	47839.6	46716.6	45308.8	43391.7	41211.1	39882.6	39144.1	39019.3	38737.7	38100.1	37756.1	37779	37712	38153.1	38924.6	39645.7	38759.3	38174.9	39930	41430.6
aus	Australia	High SDI	TRUE	Air pollution deaths	2555.04	2479.75	2460.72	2410.58	2412.89	2369.73	2361.12	2318.48	2260.68	2201.74	2148.65	2105.37	2049.02	1954.59	1839.84	1767.73	1737.63	1738.38	1727.43	1682.36	1662.39	1673.91	1674.03	1685.97	1725.37	1760.96	1725.17	1697.29	1811.95	1906.83
aus	Australia	High SDI	TRUE	All cause DALYs	4.70752e+06	4.69743e+06	4.73769e+06	4.74434e+06	4.80543e+06	4.82509e+06	4.87661e+06	4.8976e+06	4.92096e+06	4.94528e+06	4.96286e+06	4.97857e+06	5.02499e+06	5.04936e+06	5.07665e+06	5.10949e+06	5.16473e+06	5.25706e+06	5.33187e+06	5.38882e+06	5.43322e+06	5.49861e+06	5.5334e+06	5.60218e+06	5.70726e+06	5.82012e+06	5.89951e+06	6.02608e+06	6.17172e+06	6.2891e+06
aus	Australia	High SDI	TRUE	All cause deaths	117667	117468	119521	120279	123199	123854	125941	126347	126409	126780	127598	128475	130575	130695	130715	130885	132714	136258	138941	139463	140412	143114	143942	145758	149984	154344	156057	159889	166078	170852
aut	Austria	High SDI	TRUE	PM-equivalent emissions	280.674	288.699	262.853	257.798	244.684	246.117	256.342	242.67	245.746	238.159	235.842	245.68	245.024	250.624	247.147	245.66	238.663	228.725	214.797	200.137	204.981	195.804	191.278	194.617	185.069	182.205	178.646	173.415	168.597	165.049
aut	Austria	High SDI	TRUE	Fossil/industrial fraction	0.874992	0.869053	0.862636	0.859503	0.860246	0.851998	0.847495	0.847903	0.854998	0.837523	0.84705	0.844054	0.84987	0.852186	0.850512	0.850888	0.839051	0.82919	0.819011	0.799245	0.779322	0.777792	0.766786	0.749964	0.759046	0.753061	0.75087	0.746328	0.743459	0.74228
aut	Austria	High SDI	TRUE	Air pollution DALYs	109269	108947	107379	105475	102545	101114	98950.6	94621.7	90703.4	86891.7	83359.3	80144.3	79092.7	77904.7	75501.7	73700.9	71635.5	70675.2	69236.9	69306.2	68149.5	66541.6	64887.7	62730.1	60333.6	58234.7	53701.3	50383.1	50912.6	52436.2
aut	Austria	High SDI	TRUE	Air pollution deaths	5409.8	5398.11	5324.24	5229.63	5074.84	5021.58	4922.23	4708.97	4514.84	4340.02	4165.05	4003.88	3982.3	3928.54	3787.48	3702.06	3596.65	3540.89	3458.85	3442.73	3375.74	3302.72	3237.52	3126.15	3010.68	2921.81	2695.76	2527.39	2568.43	2654.94
aut	Austria	High SDI	TRUE	All cause DALYs	2.59542e+06	2.59545e+06	2.58688e+06	2.5729e+06	2.55008e+06	2.53522e+06	2.51869e+06	2.48566e+06	2.46902e+06	2.45686e+06	2.44325e+06	2.41979e+06	2.42582e+06	2.43623e+06	2.42284e+06	2.4259e+06	2.40688e+06	2.41037e+06	2.40843e+06	2.43077e+06	2.43418e+06	2.43815e+06	2.45265e+06	2.46422e+06	2.47725e+06	2.50508e+06	2.50642e+06	2.50463e+06	2.51407e+06	2.5322e+06
aut	Austria	High SDI	TRUE	All cause deaths	81754.7	81749.1	81442	80795.1	79698.3	79751	79497	78265.6	77664.7	77257	76628.7	75299.4	75700	75845.9	74614.2	74903.7	74045.8	74295.7	74328.5	75357.6	75753.7	76467.9	77820.8	78451.5	79083.1	80892.7	80902.5	80604.1	81150.4	82490
aze	Azerbaijan	High-middle SDI	FALSE	PM-equivalent emissions	448.931	441.394	392.075	404.654	354.406	343.621	332.617	329.928	354.865	346.014	360.121	247.97	237.278	270.961	241.054	264.679	241.321	227.476	204.304	173.846	164.383	177.817	185.499	186.512	185.568	199.276	210.636	196.503	197.888	199.004
aze	Azerbaijan	High-middle SDI	FALSE	Fossil/industrial fraction	0.856945	0.852747	0.832748	0.835778	0.809882	0.802717	0.794217	0.791355	0.804578	0.796976	0.805851	0.714598	0.699939	0.736723	0.703835	0.728058	0.697383	0.678908	0.639928	0.578882	0.54738	0.577312	0.591911	0.582323	0.574274	0.600608	0.620812	0.59291	0.603399	0.614214
aze	Azerbaijan	High-middle SDI	FALSE	Air pollution DALYs	346603	354829	364842	367706	368290	358359	345938	328878	314270	300199	285779	270647	262305	258828	254365	254774	252620	248967	249839	249468	250014	251305	251698	250483	249930	249604	246508	245055	243801	246616
aze	Azerbaijan	High-middle SDI	FALSE	Air pollution deaths	7967.64	8329.46	8795.76	9166.12	9442.76	9312.34	9099.53	8747.6	8497.7	8296.39	8076.57	7842.45	7768.12	7812.46	7766.56	7920	8005.62	7998.98	8103.05	8177.43	8249.8	8379	8486.98	8562.83	8673.27	8698.93	8695.17	8695.96	8558.73	8642.61
aze	Azerbaijan	High-middle SDI	FALSE	All cause DALYs	3.20177e+06	3.26733e+06	3.55748e+06	3.53213e+06	3.55992e+06	3.33109e+06	3.1955e+06	3.1254e+06	3.08078e+06	3.04491e+06	3.00773e+06	2.95564e+06	2.95959e+06	3.00196e+06	3.03522e+06	3.07053e+06	3.05856e+06	3.03767e+06	3.06126e+06	3.07446e+06	3.0977e+06	3.11384e+06	3.11792e+06	3.12043e+06	3.12682e+06	3.1277e+06	3.13933e+06	3.1526e+06	3.14392e+06	3.1577e+06
aze	Azerbaijan	High-middle SDI	FALSE	All cause deaths	57945.8	60075.9	66241.2	67615.6	69543.1	65805.8	63441.8	62088.1	61620.1	61617.5	61556.9	61312.8	62389	64448.2	65865.6	67506.7	68090.8	67899.2	68903	69765.1	70664.4	71737	72444.3	73112.3	74147.7	74333.9	75373.5	76169.8	74887.4	75128.8
bhs	Bahamas	High-middle SDI	FALSE	PM-equivalent emissions	16.1571	16.1516	16.1065	15.7543	15.9252	17.8127	18.8711	17.5819	20.3394	18.5461	18.1317	18.818	18.4996	20.8117	20.2592	19.6436	19.1139	18.8968	15.5252	17.293	20.4663	17.6858	26.886	25.5799	24.5765	24.8423	24.8418	19.0946	19.4354	18.8627
bhs	Bahamas	High-middle SDI	FALSE	Fossil/industrial fraction	0.894101	0.89401	0.896131	0.889034	0.890825	0.903898	0.909656	0.90481	0.918993	0.89444	0.895014	0.898981	0.89111	0.899216	0.893728	0.898369	0.881947	0.880476	0.846492	0.875614	0.902851	0.88643	0.92209	0.918308	0.90873	0.90384	0.906341	0.88314	0.885696	0.882704
bhs	Bahamas	High-middle SDI	FALSE	Air pollution DALYs	2229.36	2273.95	2314.72	2356.97	2368.99	2398.79	2464.78	2458.05	2479.97	2522.66	2447.27	2480.83	2430.44	2455.74	2489.09	2460.68	2499.64	2459.89	2489.8	2542.59	2571.99	2626.3	2681.78	2759.54	2860.76	2980.27	2978.2	2971.57	3063.69	3169.71
bhs	Bahamas	High-middle SDI	FALSE	Air pollution deaths	68.2668	69.1476	70.2071	72.0153	73.3138	74.4203	77.7682	77.0534	78.1221	81.1611	78.6348	80.0185	77.507	77.6133	78.2721	75.8817	77.0619	74.9988	76.5243	79.6176	80.6777	82.7252	84.5405	86.856	89.9908	94.5171	94.8707	94.9275	98.3742	102.295
bhs	Bahamas	High-middle SDI	FALSE	All cause DALYs	73650.3	76125.7	79550.6	83361.6	86566.5	87615.6	91177.3	90167.7	90337.7	94962.8	94494	95764.7	94536.6	93989.9	95889.4	94680.5	97795.4	97071.7	99245.7	101956	103602	105659	107442	108431	110142	113639	113320	114843	116285	121720
bhs	Bahamas	High-middle SDI	FALSE	All cause deaths	1428.84	1470.71	1531.23	1613.45	1682.49	1706.94	1799.82	1768.14	1781.67	1910.56	1898.69	1949.48	1920.83	1907.55	1942.54	1887.5	1962.62	1938.19	2011.1	2112.41	2159.42	2213.41	2254.66	2286.56	2340.04	2445.3	2468.31	2521.43	2585.48	2731.39
bhr	Bahrain	High-middle SDI	FALSE	PM-equivalent emissions	45.1583	44.1798	50.8804	58.2823	58.8894	60.3065	60.5715	59.9123	62.6148	62.6335	62.8671	63.2389	65.6531	68.4536	69.4615	85.0525	101.638	95.6585	90.3928	83.2661	81.7632	80.743	80.8207	81.6968	82.9809	85.1893	85.6426	87.262	87.1208	89.7105
bhr	Bahrain	High-middle SDI	FALSE	Fossil/industrial fraction	0.99965	0.999604	0.999621	0.999632	0.999603	0.999583	0.999559	0.999525	0.999518	0.99949	0.999455	0.999416	0.999388	0.999363	0.99931	0.999371	0.999417	0.999319	0.999218	0.999093	0.999032	0.998989	0.998974	0.998978	0.998991	0.999016	0.999021	0.999039	0.999042	0.999078
bhr	Bahrain	High-middle SDI	FALSE	Air pollution DALYs	11094	11183	11165	11058.8	11001.9	10994.4	11026.5	11098.9	11285.4	11602.8	11344.9	11093.5	11698.8	12473	12873.8	13112.3	13303	13516.8	13833.4	14237.6	14748.1	15285.3	15825.1	16384.6	17074.4	17973.8	18720	19667.4	20774.4	22128.6
bhr	Bahrain	High-middle SDI	FALSE	Air pollution deaths	320.62	327.12	328.715	325.763	327.44	333.279	340.702	345.168	353.224	362.571	339.659	318.207	357.133	397.564	410.807	416.886	417.668	419.292	423.195	427.014	434.623	442.632	450.868	458.369	471.811	499.405	526.776	560.898	593.75	638.223
bhr	Bahrain	High-middle SDI	FALSE	All cause DALYs	124506	127385	128667	129295	129730	129878	130679	132101	134279	137448	146261	139700	145961	155577	165543	174900	186681	191201	201698	212021	221186	230005	236078	243081	250327	257142	262879	271131	277318	285923
bhr	Bahrain	High-middle SDI	FALSE	All cause deaths	1962.17	2021.06	2044.64	2044.74	2060.13	2088.78	2131.45	2157.33	2200.55	2251.8	2304.29	2073.05	2279.17	2508.06	2626.65	2711.62	2822.49	2794.81	2867.06	2929.56	2991.92	3077.23	3125.94	3188.06	3277.78	3429.6	3592.38	3822.83	4002.91	4265.87
bgd	Bangladesh	Low SDI	TRUE	PM-equivalent emissions	747.103	767.375	792.435	815.105	842.119	892.152	887.202	904.965	907.283	930.194	939.058	978.171	995.582	991.764	1008.95	1046.23	1082.37	1099.5	1163.51	1163.77	1202.98	1280.14	1334.18	1357.55	1399.53	1438.98	1428.94	1495.52	1568.43	1624
bgd	Bangladesh	Low SDI	TRUE	Fossil/industrial fraction	0.659826	0.664997	0.669575	0.670339	0.660653	0.672047	0.675471	0.673421	0.669074	0.670866	0.667103	0.677231	0.675906	0.672142	0.683885	0.695018	0.70418	0.70303	0.713998	0.709648	0.716362	0.730546	0.73859	0.740218	0.745247	0.750503	0.746908	0.756454	0.767884	0.775931
bgd	Bangladesh	Low SDI	TRUE	Air pollution DALYs	1.08203e+07	1.04428e+07	1.01363e+07	9.8104e+06	9.51355e+06	9.32112e+06	9.04804e+06	8.75115e+06	8.42992e+06	8.15995e+06	8.01496e+06	7.80775e+06	7.68158e+06	7.55038e+06	7.39833e+06	7.29655e+06	7.17015e+06	7.04804e+06	6.81839e+06	6.60767e+06	6.44728e+06	6.18037e+06	5.94817e+06	5.79808e+06	5.71307e+06	5.60152e+06	5.49637e+06	5.45454e+06	5.40359e+06	5.40398e+06
bgd	Bangladesh	Low SDI	TRUE	Air pollution deaths	189795	179652	176502	172532	168986	168346	164776	161147	158852	157848	159196	158355	160499	162577	163094	165735	168250	168350	165928	165123	166128	158413	152624	153263	157813	158098	160162	167502	170422	173515
bgd	Bangladesh	Low SDI	TRUE	All cause DALYs	7.73573e+07	8.36699e+07	7.21856e+07	6.97433e+07	6.74936e+07	6.59006e+07	6.37017e+07	6.17466e+07	5.96339e+07	5.77082e+07	5.63877e+07	5.49835e+07	5.38925e+07	5.29619e+07	5.19616e+07	5.11552e+07	5.02689e+07	4.95969e+07	4.82471e+07	4.72627e+07	4.65715e+07	4.53366e+07	4.42399e+07	4.36954e+07	4.35002e+07	4.30996e+07	4.29792e+07	4.31607e+07	4.30333e+07	4.31229e+07
bgd	Bangladesh	Low SDI	TRUE	All cause deaths	1.12549e+06	1.20896e+06	1.03656e+06	1.00388e+06	973978	958963	926900	900253	878445	860579	851511	836873	833560	831300	822519	821382	821482	817954	800314	794013	796029	762401	735374	738694	759494	762381	778234	816603	831872	849561
brb	Barbados	High-middle SDI	FALSE	PM-equivalent emissions	9.701	11.4209	9.64829	9.44293	8.86881	9.32269	9.18233	10.4072	10.7965	10.4934	12.2958	9.90178	9.63112	9.98454	8.91847	10.0229	9.86377	10.9942	11.4714	12.4102	12.7492	11.3988	16.0419	15.7557	15.3297	15.3643	15.38	11.5427	11.7778	11.4588
brb	Barbados	High-middle SDI	FALSE	Fossil/industrial fraction	0.895815	0.905688	0.880837	0.894221	0.87543	0.872554	0.864508	0.874817	0.898194	0.882526	0.899745	0.879586	0.877667	0.889678	0.877478	0.893693	0.892276	0.907282	0.91994	0.921706	0.917635	0.924631	0.94745	0.947447	0.940235	0.935022	0.938009	0.922842	0.924916	0.923331
brb	Barbados	High-middle SDI	FALSE	Air pollution DALYs	3469.11	3434.16	3478.04	3479.85	3497.24	3489	3474.87	3476.51	3423.68	3330.9	3320.36	3174.84	3201.56	3219.52	3154.18	3098.71	3128.36	3167.39	3161.18	3134.69	3162.11	3243.6	3317.73	3483.02	3654.58	3768.31	3772.92	3779.99	3907.05	4130.21
brb	Barbados	High-middle SDI	FALSE	Air pollution deaths	152.108	150.667	154.868	156.574	157.655	157.087	155.193	154.591	150.987	145.331	145.165	138.637	140.121	141.194	137.671	132.597	132.577	133.343	132.367	129.365	130.499	134.414	137.696	144.69	152.055	157.166	157.405	157.797	163.871	175.099
brb	Barbados	High-middle SDI	FALSE	All cause DALYs	78603.5	77834	79235.3	79646	80345.5	80542.5	80252.2	80360.5	80018.5	79567	80560.4	79320.3	80667	82220.9	82987.6	82741.3	83378.7	84023.2	84412.2	84534.5	85670.9	86774.3	87176.5	88651.7	90280	91710.7	93173.5	94781	96747.3	99668.2
brb	Barbados	High-middle SDI	FALSE	All cause deaths	2264.27	2249.73	2326.56	2368.6	2399.29	2406.48	2395.94	2405.11	2381.54	2337.56	2378.3	2336.46	2408.75	2480.73	2505.11	2452.56	2461.7	2469.26	2464.64	2429.37	2465.73	2510.83	2529.09	2589.47	2656.9	2718.26	2780.1	2848.31	2942.24	3093.21
blr	Belarus	High-middle SDI	FALSE	PM-equivalent emissions	1110.37	1081.59	875.146	726.642	570.193	523.381	533.997	504.551	483.629	444.341	409.72	392.834	379.586	366.078	372.136	378.254	412.353	378.704	416.127	482.812	423.922	412.389	423.498	394.953	387.684	366.369	364.769	359.333	357.951	347.494
blr	Belarus	High-middle SDI	FALSE	Fossil/industrial fraction	0.977139	0.97601	0.97004	0.963675	0.94388	0.936373	0.928149	0.909623	0.902928	0.892776	0.873351	0.857463	0.849423	0.845456	0.85216	0.843207	0.846466	0.848768	0.863513	0.880085	0.850361	0.843737	0.846797	0.840987	0.845124	0.841581	0.842867	0.835854	0.841942	0.851788
blr	Belarus	High-middle SDI	FALSE	Air pollution DALYs	274294	281943	289409	314123	314672	324985	319355	319766	322237	327527	308869	321905	335988	323323	314076	318151	305709	291022	291627	294259	297070	297382	255332	240601	226319	209844	194137	185913	184396	185350
blr	Belarus	High-middle SDI	FALSE	Air pollution deaths	11707.6	12024.6	12255.9	13289.4	13312.5	13698.2	13471.7	13518.3	13614.5	13884.4	13133.5	13684.8	14275.2	13770.1	13418.4	13607.1	13178.8	12636.4	12703.7	12890.9	13003.7	13075.6	11457.6	10926.4	10344.6	9701.39	9050.54	8669.7	8541.42	8569.64
blr	Belarus	High-middle SDI	FALSE	All cause DALYs	3.92446e+06	4.04008e+06	4.15921e+06	4.41025e+06	4.45303e+06	4.56797e+06	4.53387e+06	4.58847e+06	4.66568e+06	4.75298e+06	4.56177e+06	4.69488e+06	4.84547e+06	4.72456e+06	4.63863e+06	4.68821e+06	4.54902e+06	4.36574e+06	4.34752e+06	4.34507e+06	4.36348e+06	4.39526e+06	4.00108e+06	3.92536e+06	3.86176e+06	3.76989e+06	3.73792e+06	3.74569e+06	3.73075e+06	3.74066e+06
blr	Belarus	High-middle SDI	FALSE	All cause deaths	108830	113240	117211	127507	129322	133466	132421	134726	137321	140958	134134	139788	146095	142237	139848	142498	138546	132592	132871	134187	135620	138102	125086	124139	123081	121161	121652	122686	121261	121777
bel	Belgium	High SDI	TRUE	PM-equivalent emissions	1185.39	1196.71	1176.9	1172.63	1112.67	1048.39	1112.98	1155.87	1186.09	1038.24	1101.17	1070.6	1219.91	1310.56	1353.76	1307.2	1318.08	1381.09	1359.81	1029.1	1070.46	961.763	844.727	831.663	733.96	724.937	818.879	924.605	929.388	902.331
bel	Belgium	High SDI	TRUE	Fossil/industrial fraction	0.989648	0.989988	0.989892	0.990988	0.991028	0.988932	0.989928	0.991119	0.99092	0.990148	0.99031	0.989278	0.990896	0.990014	0.989267	0.988658	0.987771	0.986335	0.984829	0.980395	0.980008	0.97849	0.974218	0.973892	0.975089	0.972285	0.974322	0.978232	0.978672	0.978358
bel	Belgium	High SDI	TRUE	Air pollution DALYs	150043	146231	142323	140673	137188	135508	131613	127608	124664	120978	117190	112211	110799	107174	102530	100014	97887	99045.7	100460	101906	101464	98479	93950.5	87373.4	80209.5	76756.3	74149.3	73846	74625.5	75473.4
bel	Belgium	High SDI	TRUE	Air pollution deaths	7211.74	7014.63	6831.56	6804.13	6629.25	6581.33	6425.44	6231.48	6101.27	5917.6	5745	5496.25	5484.7	5319.71	5069.09	4928.69	4800.34	4853.67	4922.46	4990.21	4962.39	4814.69	4627.47	4317.07	3954.9	3806.26	3668.19	3659.75	3732.95	3786.87
bel	Belgium	High SDI	TRUE	All cause DALYs	3.29637e+06	3.28925e+06	3.29239e+06	3.29882e+06	3.28902e+06	3.28282e+06	3.26158e+06	3.25367e+06	3.25678e+06	3.26233e+06	3.26852e+06	3.2617e+06	3.27228e+06	3.27291e+06	3.24835e+06	3.25368e+06	3.24111e+06	3.26217e+06	3.2831e+06	3.29824e+06	3.30951e+06	3.31994e+06	3.33813e+06	3.33535e+06	3.30511e+06	3.32844e+06	3.32691e+06	3.35391e+06	3.37644e+06	3.39727e+06
bel	Belgium	High SDI	TRUE	All cause deaths	103126	102574	103031	103916	103390	103647	103301	102948	103043	103161	103312	102767	103621	103526	101607	101697	100750	101518	102663	103486	104126	105061	107113	107764	106485	108854	108668	110197	112085	114074
blz	Belize	Low-middle SDI	FALSE	PM-equivalent emissions	21.9733	22.2342	21.5036	23.8026	23.0642	24.1871	22.8942	22.511	24.197	22.9546	24.2401	23.8877	23.75	20.7224	20.8647	18.3541	22.8605	22.6387	20.5387	21.4788	22.513	22.2927	23.7943	23.6213	23.5006	23.5847	23.5653	22.4071	22.4937	22.4207
blz	Belize	Low-middle SDI	FALSE	Fossil/industrial fraction	0.119522	0.144463	0.15288	0.132934	0.13453	0.136881	0.124416	0.15495	0.156661	0.182162	0.226873	0.263231	0.181982	0.215459	0.227401	0.252231	0.201992	0.210647	0.177057	0.168476	0.177098	0.162826	0.21585	0.213409	0.204293	0.204229	0.205526	0.166219	0.169714	0.167278
blz	Belize	Low-middle SDI	FALSE	Air pollution DALYs	3101.17	2986.17	2900.03	2833.94	2787.05	2836.57	2930.41	3077.67	3216.06	3329.6	3386.06	3271.5	3183.42	3141.85	3131.52	3109.97	3108.79	3045.33	2959.11	2984.91	3049.78	3124.67	3192.44	3325.21	3472.17	3618.86	3661.91	3682.48	3819.7	3946.03
blz	Belize	Low-middle SDI	FALSE	Air pollution deaths	82.9936	78.6352	77.1194	77.134	78.091	81.1698	86.3852	93.0435	98.4582	103.305	105.523	98.3528	93.9803	93.2467	93.4889	92.4952	93.1354	90.9979	87.5287	88.7651	91.549	93.7694	95.8769	100.655	106.584	111.502	112.354	113.572	119.76	124.352
blz	Belize	Low-middle SDI	FALSE	All cause DALYs	55416.2	56424.7	55540.4	56156.9	57056.3	58216.6	60528.5	63331.8	66790.2	68386.6	71233.3	72838.2	72564.4	73507.1	74998.7	76093.9	77371.7	78111.8	79448.7	81798.5	84863.7	86804.5	87838.8	89950.3	92855.3	96154.8	98889.7	101482	104373	107067
blz	Belize	Low-middle SDI	FALSE	All cause deaths	910.455	910.11	898.751	920.139	952.095	991.537	1061.55	1144.31	1227.63	1276.94	1333.04	1315.59	1288.35	1299.9	1328.97	1338.26	1366.98	1371.64	1377.16	1426.31	1493.33	1526.04	1540.25	1587.25	1661.48	1736.06	1782.68	1838.64	1923.98	1990.12
ben	Benin	Low SDI	TRUE	PM-equivalent emissions	170.179	172.876	174.837	179.583	184.039	186.936	197.985	203.469	203.836	202.265	193.446	196.431	201.711	201.562	201.823	201.728	207.79	207.256	204.985	206.548	197.342	197.013	198.737	208.711	216.866	237.723	237.915	238.959	241.721	243.643
ben	Benin	Low SDI	TRUE	Fossil/industrial fraction	0.0847683	0.0845762	0.0865037	0.0874905	0.0909508	0.0889088	0.104262	0.108972	0.108607	0.121188	0.131433	0.141201	0.149853	0.158589	0.162359	0.170699	0.188204	0.21495	0.216111	0.234324	0.276917	0.271776	0.27309	0.283842	0.305877	0.361368	0.35408	0.353044	0.361086	0.36672
ben	Benin	Low SDI	TRUE	Air pollution DALYs	631461	632253	631219	629069	629660	627823	628262	628570	630316	632013	637671	634583	647885	647321	656638	655365	658225	659065	666151	679014	692988	700492	715407	720071	719006	732683	732389	725886	699945	687639
ben	Benin	Low SDI	TRUE	Air pollution deaths	9927.03	9957.84	9966.79	9963.42	10022.5	10057	10129.9	10163.4	10223.1	10281.4	10412.8	10402.4	10619.9	10630.4	10768.1	10781.6	10883.1	10908.4	11090.3	11334.4	11586.4	11776	12038.2	12185.1	12228.7	12481.1	12517.6	12523.1	12288.2	12238.2
ben	Benin	Low SDI	TRUE	All cause DALYs	4.8832e+06	4.95448e+06	4.97179e+06	5.01092e+06	5.08891e+06	5.14056e+06	5.23566e+06	5.29058e+06	5.37243e+06	5.4436e+06	5.55574e+06	5.64515e+06	5.70814e+06	5.80114e+06	5.88229e+06	5.96149e+06	6.0494e+06	6.13166e+06	6.17114e+06	6.22198e+06	6.29564e+06	6.37768e+06	6.45112e+06	6.51561e+06	6.57364e+06	6.61798e+06	6.64774e+06	6.64893e+06	6.57477e+06	6.52979e+06
ben	Benin	Low SDI	TRUE	All cause deaths	66730.6	67679.4	67984.2	68572.1	69804.5	70755.7	72310.9	73213.5	74527.8	75681.9	77392	78786.6	79798.5	81182.3	82319.2	83385.7	84647	85775	86129.6	86597.5	87573.3	88803	89924.8	91072	92120.2	92908.7	93497.4	93780.6	93305.9	93065.2
bmu	Bermuda	High-middle SDI	FALSE	PM-equivalent emissions	3.73032	3.59149	2.96429	3.16091	3.06865	3.1556	3.41473	3.22131	3.33283	3.30405	3.2258	3.03477	3.30339	3.30596	3.94963	3.41982	3.48755	4.36188	3.43297	4.17117	4.45707	3.40691	5.2524	3.71799	3.66372	3.70251	3.70631	2.72771	2.78861	2.70554
bmu	Bermuda	High-middle SDI	FALSE	Fossil/industrial fraction	0.969015	0.96596	0.957169	0.95606	0.955096	0.957824	0.9585	0.956085	0.953166	0.944696	0.951647	0.950983	0.952759	0.954927	0.960608	0.957023	0.959752	0.965553	0.963113	0.96693	0.968094	0.95878	0.969373	0.965938	0.960276	0.956429	0.959075	0.949248	0.950814	0.94974
bmu	Bermuda	High-middle SDI	FALSE	Air pollution DALYs	539.117	519.143	494.297	483.227	466.588	441.448	428.183	392.775	363.314	340.962	321.571	302.632	289.534	278.084	268.541	261.103	252.168	240.083	226.887	217.56	208.743	207.455	204.031	204.23	204.772	207.682	214.247	221.592	220.315	216.582
bmu	Bermuda	High-middle SDI	FALSE	Air pollution deaths	22.2016	21.4078	20.306	20.0126	19.3943	18.2561	17.9643	16.4026	15.2325	14.3412	13.6437	12.7921	12.2336	11.689	11.2133	10.8809	10.5194	10.019	9.49015	9.16347	8.81721	8.8111	8.65444	8.71524	8.79988	9.03299	9.41606	9.82807	9.76319	9.61829
bmu	Bermuda	High-middle SDI	FALSE	All cause DALYs	18031.5	17711.1	17513.3	17647.1	17494.5	17000.2	17262.9	16757.9	16583.5	16570.7	17093	16445.4	16427.5	16568	16347.4	16365	16513.3	16527.8	16618.4	16686.9	16767.9	16871.4	17031.1	17222.1	17459.6	17622.7	17779.5	17994.7	18193.6	18370.8
bmu	Bermuda	High-middle SDI	FALSE	All cause deaths	490.613	480.579	468.356	474.745	470.559	453.023	465.782	446.447	441.309	442.879	457.116	439.919	439.301	440.682	434.78	436.356	442.771	444.473	450.557	456.786	463.131	471.395	482.625	496.777	512.506	525.689	538.017	552.238	566.498	579.598
btn	Bhutan	Low-middle SDI	FALSE	PM-equivalent emissions	40.5243	39.9259	38.797	37.9454	38.1898	37.7111	39.559	40.0015	39.9661	40.6027	40.2489	41.0045	42.5224	43.907	43.5199	44.6866	43.8993	44.9225	45.952	46.5838	48.5486	51.6146	51.8349	53.107	52.7867	53.6481	54.1032	54.998	56.7888	57.7129
btn	Bhutan	Low-middle SDI	FALSE	Fossil/industrial fraction	0.514939	0.521068	0.531424	0.540493	0.536268	0.542684	0.528176	0.53475	0.54533	0.556395	0.556904	0.561744	0.569215	0.586146	0.59534	0.594168	0.599962	0.592993	0.595931	0.5889	0.598926	0.639541	0.643329	0.653507	0.651078	0.657891	0.663397	0.666938	0.677464	0.68265
btn	Bhutan	Low-middle SDI	FALSE	Air pollution DALYs	50042.9	47388.3	44215.3	42320	40875.4	39941.5	39345.9	39060.3	38201.2	35836.3	35334.9	33807.9	31792.6	30458.5	28761.8	27031.5	25169.1	24929	23835.1	22836.1	22181.6	21785.8	21429.6	21191.5	20880.2	20595.9	20062.2	19532.3	19231.9	19067.9
btn	Bhutan	Low-middle SDI	FALSE	Air pollution deaths	833.47	810.732	781.16	767.327	758.099	755.4	752.161	758.903	758.202	735.056	740.323	726.43	706.742	698.135	682.862	667.282	648.736	650.461	641.371	633.585	630.514	635.397	641.696	647.462	649.871	654.116	652.915	651.335	652.859	659.613
btn	Bhutan	Low-middle SDI	FALSE	All cause DALYs	419764	395008	369370	351480	340909	328392	318483	312321	304897	296421	301345	280767	272034	264095	256245	249620	244517	239876	237074	236114	232718	231211	229612	227917	225992	223912	221591	218996	216180	213975
btn	Bhutan	Low-middle SDI	FALSE	All cause deaths	5661.81	5409.11	5142.26	4956.03	4862.52	4721.39	4602.62	4556.77	4490.35	4404.64	4554.31	4278.84	4200.42	4143.63	4085	4047.46	4025.09	4010.1	4017.68	4057.98	4046.39	4066.69	4088.95	4115.17	4140.51	4164.82	4184.71	4203.79	4223.96	4252.35
bol	Bolivia (Plurinational State of)	Low-middle SDI	FALSE	PM-equivalent emissions	597.73	655.099	678.311	704.598	842.488	895.073	890.449	914.341	898.632	1010.16	1019.26	1004.48	1050.39	1033.98	911.763	1134.04	1205.96	1204.14	1204.58	1036.06	967.805	974.982	996.142	988.028	995.513	982.933	996.978	1024.38	1026.78	1029.24
bol	Bolivia (Plurinational State of)	Low-middle SDI	FALSE	Fossil/industrial fraction	0.0981097	0.0945299	0.093458	0.0953123	0.0844094	0.0866044	0.0841981	0.0806661	0.0855232	0.074634	0.0804503	0.0796337	0.0789527	0.084647	0.105651	0.0891874	0.0916951	0.0943238	0.102059	0.120753	0.142483	0.147932	0.165037	0.157342	0.162649	0.150765	0.16292	0.189399	0.191736	0.194073
bol	Bolivia (Plurinational State of)	Low-middle SDI	FALSE	Air pollution DALYs	460631	441115	420436	400924	381284	363885	345175	326003	306709	290600	276718	264157	252777	242587	235323	231031	228187	227620	226839	226172	225628	225070	223327	220973	217144	212806	206552	201043	197077	195598
bol	Bolivia (Plurinational State of)	Low-middle SDI	FALSE	Air pollution deaths	8055.24	7848.99	7632.88	7432.52	7196.48	7004.9	6757.8	6549.15	6299.66	6096.21	5934.28	5787.31	5676.47	5588.17	5540.84	5565.42	5629.4	5742.72	5852.02	5971.96	6092.83	6221.03	6296.48	6330.63	6329.55	6323.24	6274.83	6195.94	6206.2	6254.74
bol	Bolivia (Plurinational State of)	Low-middle SDI	FALSE	All cause DALYs	4.05e+06	4.03658e+06	3.99947e+06	3.94458e+06	3.87557e+06	3.84165e+06	3.80206e+06	3.7683e+06	3.73049e+06	3.69209e+06	3.65505e+06	3.59879e+06	3.56911e+06	3.52751e+06	3.491e+06	3.46826e+06	3.45885e+06	3.46949e+06	3.48358e+06	3.4899e+06	3.50747e+06	3.53135e+06	3.54844e+06	3.58008e+06	3.59798e+06	3.60658e+06	3.61583e+06	3.63659e+06	3.63739e+06	3.65112e+06
bol	Bolivia (Plurinational State of)	Low-middle SDI	FALSE	All cause deaths	61272.2	61389.6	61292.7	61049.9	60421.4	60428.9	60201.6	60400.2	60368.6	60379.5	60381.7	60053.4	60270.1	60296.7	60336.2	60719.6	61362.8	62322.2	63427.9	64427.3	65641.7	67002.2	68122.7	69473.1	70603.4	71555.8	72577.9	73676.8	74760.9	75910
bih	Bosnia and Herzegovina	High-middle SDI	FALSE	PM-equivalent emissions	504.636	461.1	364.164	319.208	72.9908	78.4113	77.2831	154.993	188.766	184.492	220.701	219.549	228.998	235.04	239.38	245.916	263.903	276.125	297.704	279.763	274.918	311.334	289.196	289.118	288.061	292.886	332.579	332.176	333.069	398.886
bih	Bosnia and Herzegovina	High-middle SDI	FALSE	Fossil/industrial fraction	0.971771	0.96882	0.960597	0.955186	0.842932	0.829145	0.832052	0.91556	0.925507	0.925199	0.937324	0.938224	0.939498	0.938865	0.940208	0.951803	0.954699	0.949921	0.957629	0.958469	0.957912	0.963007	0.960439	0.96123	0.931559	0.91869	0.929166	0.94028	0.940988	0.951177
bih	Bosnia and Herzegovina	High-middle SDI	FALSE	Air pollution DALYs	141003	153127	153431	154576	153939	152169	148176	145035	136039	133678	134138	134437	135478	132858	129844	131686	127955	131931	123512	122029	119702	118320	115433	115182	114179	114862	109940	106590	106228	105742
bih	Bosnia and Herzegovina	High-middle SDI	FALSE	Air pollution deaths	5179.22	5699.89	5736.61	5829.38	5862.78	5851.71	5738.93	5643.87	5253.16	5159.92	5216.95	5429.19	5554.74	5514.22	5434.25	5533.63	5389.52	5573.71	5223.75	5194.37	5148.4	5171.45	5085.32	5091.09	5095.41	5180.6	4976.33	4850.56	4850.38	4836.8
bih	Bosnia and Herzegovina	High-middle SDI	FALSE	All cause DALYs	1.26739e+06	1.32231e+06	1.7399e+06	1.61167e+06	1.43685e+06	1.78066e+06	1.21222e+06	1.2145e+06	1.18462e+06	1.1794e+06	1.19052e+06	1.19887e+06	1.218e+06	1.21653e+06	1.21041e+06	1.22883e+06	1.21545e+06	1.24395e+06	1.19699e+06	1.18674e+06	1.17441e+06	1.16756e+06	1.15566e+06	1.15962e+06	1.15956e+06	1.17259e+06	1.16023e+06	1.1533e+06	1.15336e+06	1.15071e+06
bih	Bosnia and Herzegovina	High-middle SDI	FALSE	All cause deaths	28820.3	31330.3	38724	37125.9	34609.7	41163.6	31017.2	30915.4	29342.7	29166.6	29939.4	31625.1	32848.3	33194.7	33247.1	34339.9	34008.8	35458.2	33915.7	34087.2	34226.3	34764.4	34700.9	35198.8	35770.5	36960.5	36738.6	36826.7	37214.2	37424
bwa	Botswana	Middle SDI	FALSE	PM-equivalent emissions	197.127	195.345	212.161	212.856	211.434	218.96	216.323	219.946	225.122	219.227	213.907	208.218	200.684	214.638	200.333	222.417	229.902	217.412	228.619	231.027	218.702	211.385	225.992	238.208	239.239	238.52	239.57	249.731	248.446	243.052
bwa	Botswana	Middle SDI	FALSE	Fossil/industrial fraction	0.386585	0.379924	0.388493	0.389077	0.391828	0.40117	0.385765	0.376314	0.426602	0.434745	0.453867	0.434658	0.472647	0.468884	0.46606	0.487897	0.436579	0.431065	0.441436	0.438358	0.402138	0.380523	0.419674	0.44858	0.450108	0.447271	0.448295	0.469365	0.466637	0.454815
bwa	Botswana	Middle SDI	FALSE	Air pollution DALYs	58287	58698.6	59608.2	60567.6	62077.5	63527.2	64607.3	65559.3	67578.8	68880.3	70407.8	71511.6	72060.1	71391.6	69839.3	67751.4	67731.5	65812.4	65689.9	65468.3	65986.7	66092.6	65447.8	64909.2	64441.7	63936.7	62660.5	62079.8	61705.4	61444.3
bwa	Botswana	Middle SDI	FALSE	Air pollution deaths	1283.32	1307.93	1343.38	1380.8	1431.38	1481.7	1520.59	1551.69	1600.67	1637.37	1679.76	1708.48	1720.18	1699.29	1654.26	1597.66	1585.04	1543.02	1549.25	1550.4	1567.53	1583.03	1582.33	1586.65	1590.56	1591.12	1577.2	1580.73	1587.63	1596.02
bwa	Botswana	Middle SDI	FALSE	All cause DALYs	626389	677683	748679	840474	946722	1.06436e+06	1.18374e+06	1.30347e+06	1.42381e+06	1.53296e+06	1.63225e+06	1.70681e+06	1.74402e+06	1.71631e+06	1.60915e+06	1.47523e+06	1.42194e+06	1.32632e+06	1.28097e+06	1.22757e+06	1.20361e+06	1.18605e+06	1.16133e+06	1.13969e+06	1.12753e+06	1.12213e+06	1.11302e+06	1.12046e+06	1.12403e+06	1.1237e+06
bwa	Botswana	Middle SDI	FALSE	All cause deaths	10376.1	11332.5	12662.2	14372.6	16388.3	18644.9	20944.7	23245.7	25584.5	27729.7	29713.9	31219.9	31977.4	31408.2	29261.9	26605.7	25266.5	23636.7	22868.1	21934.2	21539.9	21335.2	20995.4	20710.5	20588.8	20581.4	20502.4	20787	21028.4	21171.8
bra	Brazil	Middle SDI	TRUE	PM-equivalent emissions	6658.16	7033.17	7416.54	8052.86	8754.74	9053.16	9304.57	9817.42	9760.18	10102.4	10103.1	10096.5	10542.1	10244	10019.9	10598.4	10431.5	10652.4	10620.4	10233	10334.7	10477.1	10750.3	10900.3	11095.9	10837.7	10464.5	10476	10311.9	10252.6
bra	Brazil	Middle SDI	TRUE	Fossil/industrial fraction	0.50165	0.488035	0.477186	0.464665	0.447095	0.449225	0.451353	0.44375	0.424465	0.434939	0.440046	0.439331	0.41909	0.441422	0.464063	0.436406	0.425611	0.433559	0.454013	0.448101	0.469963	0.481216	0.491946	0.502192	0.512441	0.502904	0.482005	0.482298	0.475681	0.474302
bra	Brazil	Middle SDI	TRUE	Air pollution DALYs	3.50957e+06	3.2876e+06	3.1239e+06	3.01301e+06	2.87488e+06	2.76676e+06	2.68283e+06	2.58868e+06	2.53989e+06	2.48512e+06	2.4242e+06	2.38747e+06	2.35227e+06	2.3217e+06	2.29105e+06	2.22869e+06	2.20646e+06	2.17927e+06	2.1526e+06	2.12579e+06	2.08901e+06	2.04158e+06	1.94567e+06	1.85685e+06	1.76741e+06	1.7227e+06	1.72857e+06	1.69059e+06	1.69803e+06	1.70476e+06
bra	Brazil	Middle SDI	TRUE	Air pollution deaths	86652.7	82605.9	80515.1	79970.3	77696.9	75808.1	74643.3	72800.7	72541.2	71693.4	70631.2	70380.1	70325.1	70274.7	69869.3	68219.8	68260.5	68088.3	67885	67870	67690.6	67018.1	64345.8	61975.4	59608.3	58841.5	59854	58945.5	60006.7	60914.6
bra	Brazil	Middle SDI	TRUE	All cause DALYs	5.97773e+07	5.8819e+07	5.82702e+07	5.85428e+07	5.8456e+07	5.85452e+07	5.86135e+07	5.8359e+07	5.8633e+07	5.88434e+07	5.90541e+07	5.93743e+07	5.98383e+07	6.02564e+07	6.06303e+07	6.05487e+07	6.09146e+07	6.12187e+07	6.16449e+07	6.20867e+07	6.24825e+07	6.30182e+07	6.31367e+07	6.35164e+07	6.36589e+07	6.39736e+07	6.49198e+07	6.4835e+07	6.50438e+07	6.54084e+07
bra	Brazil	Middle SDI	TRUE	All cause deaths	984030	971487	973894	997434	1.00323e+06	1.01121e+06	1.02094e+06	1.01826e+06	1.0319e+06	1.04071e+06	1.04938e+06	1.06295e+06	1.08036e+06	1.09784e+06	1.11342e+06	1.11224e+06	1.13032e+06	1.14868e+06	1.17172e+06	1.19757e+06	1.22211e+06	1.24687e+06	1.25716e+06	1.27835e+06	1.29471e+06	1.31952e+06	1.35933e+06	1.36218e+06	1.38205e+06	1.41102e+06
brn	Brunei Darussalam	High SDI	FALSE	PM-equivalent emissions	24.3592	26.7156	28.5148	32.0065	35.7375	36.6945	35.0798	36.7565	35.9137	33.8479	35.1755	35.7994	34.3289	34.6813	37.0147	36.4126	42.1131	40.634	44.3245	42.6843	39.7187	41.2255	37.3889	37.4617	35.5821	35.7334	27.5021	29.7034	30.7343	31.8516
brn	Brunei Darussalam	High SDI	FALSE	Fossil/industrial fraction	0.768353	0.783554	0.788872	0.741165	0.766438	0.771873	0.773256	0.773676	0.754237	0.741066	0.73983	0.744632	0.73897	0.801342	0.812024	0.805384	0.831543	0.826382	0.845653	0.840452	0.826299	0.832638	0.815486	0.815883	0.806222	0.80716	0.750354	0.769777	0.778414	0.787132
brn	Brunei Darussalam	High SDI	FALSE	Air pollution DALYs	1228.22	1153.82	1082.3	1014.89	939.222	883.584	837.347	816.945	792.692	760.066	743.243	743.738	760.391	787.027	797.567	809.931	805.358	783.463	758.096	750.373	762.759	824.588	941.18	1089.6	1223.48	1303.31	1247.93	1191.85	1260.24	1385.82
brn	Brunei Darussalam	High SDI	FALSE	Air pollution deaths	37.0622	34.316	31.9268	29.7864	26.9981	25.1802	23.6607	23.7416	23.2567	22.0879	21.364	21.2476	21.7235	22.6636	22.902	23.4256	23.2105	22.3217	21.3412	21.1516	21.4622	23.0503	26.3604	30.8475	34.7995	37.1629	35.6172	34.0359	36.3151	40.0125
brn	Brunei Darussalam	High SDI	FALSE	All cause DALYs	60830.6	61834.1	62482.7	63060	63238.2	63625	64010.1	64475.8	64701.2	65099.3	65826.8	66474.1	67889.2	69751.2	71173.7	72165.7	73119.2	74106.6	74764.4	76212.9	78261.6	80538.5	82821	85387.5	87481.9	89671.6	91473.3	93686.4	95857.5	97904.8
brn	Brunei Darussalam	High SDI	FALSE	All cause deaths	1095.92	1097.02	1099.92	1100.81	1079.45	1074.91	1066.46	1088	1101.66	1113.36	1124.05	1126.37	1159.6	1207.84	1238.83	1265.32	1283.58	1292.98	1301.17	1343.56	1390.51	1431.89	1479.65	1546.27	1598.86	1654.26	1704.41	1765.5	1826.09	1880.3
bgr	Bulgaria	High-middle SDI	FALSE	PM-equivalent emissions	1402.74	1207.33	1107.29	1416.45	1523.12	1491.17	1463.59	1391.66	1272.29	992.145	1022.36	987.541	932.868	1004.95	970.283	958.807	940.791	990.537	741.992	600.621	542.405	678.538	487.003	346.077	349.021	301.152	260.288	235.287	214.776	200.644
bgr	Bulgaria	High-middle SDI	FALSE	Fossil/industrial fraction	0.982384	0.978867	0.977192	0.98268	0.984387	0.982554	0.9788	0.975356	0.975286	0.967266	0.963829	0.963069	0.95638	0.958	0.955895	0.958169	0.95987	0.961302	0.946572	0.936448	0.926276	0.936929	0.910139	0.876528	0.881426	0.862907	0.83717	0.820503	0.805198	0.793417
bgr	Bulgaria	High-middle SDI	FALSE	Air pollution DALYs	396844	392848	400248	406918	417150	418898	420262	431125	414802	395689	388141	375046	363683	351795	340558	334303	327646	313538	301268	291778	283335	273607	260533	249925	250715	243082	238845	234836	234014	231329
bgr	Bulgaria	High-middle SDI	FALSE	Air pollution deaths	16706.8	16567.5	16930.9	17455.4	18001.3	18246.2	18464.9	18982.5	18259.5	17428	17167.5	16636	16212.4	15714.4	15222.6	15011.8	14827.8	14300.1	13783.4	13365.1	13080.2	12713.5	12165	11647.7	11699.8	11394.5	11183.6	11014.8	11095.3	11013.2
bgr	Bulgaria	High-middle SDI	FALSE	All cause DALYs	3.71652e+06	3.70103e+06	3.75366e+06	3.78749e+06	3.87284e+06	3.87456e+06	3.89574e+06	3.97028e+06	3.87055e+06	3.76404e+06	3.74507e+06	3.69109e+06	3.64632e+06	3.61556e+06	3.60709e+06	3.62228e+06	3.62341e+06	3.56324e+06	3.50313e+06	3.45441e+06	3.41473e+06	3.36548e+06	3.30387e+06	3.25531e+06	3.30986e+06	3.28063e+06	3.2685e+06	3.25628e+06	3.26633e+06	3.25334e+06
bgr	Bulgaria	High-middle SDI	FALSE	All cause deaths	113171	113260	116633	120961	125761	128015	130591	134695	131164	127141	127641	126278	125433	124592	124613	126547	127955	126569	124732	123453	123448	122781	121060	119138	122436	122174	122006	122026	124033	124226
bfa	Burkina Faso	Low SDI	FALSE	PM-equivalent emissions	198.732	199.14	196.982	196.108	209.255	219.468	223.987	227.86	226.46	231.309	229.917	234.069	236.369	248.836	258.782	263.488	268.799	271.741	276.694	275.635	275.962	284.44	285.914	292.485	294.596	300.067	305.709	312.229	314.064	316.39
bfa	Burkina Faso	Low SDI	FALSE	Fossil/industrial fraction	0.164721	0.172937	0.178329	0.184286	0.179324	0.176092	0.181052	0.192393	0.202334	0.200531	0.211313	0.221324	0.223938	0.244622	0.242269	0.246917	0.252779	0.26499	0.273039	0.274712	0.283523	0.292655	0.295145	0.307741	0.317	0.322405	0.325453	0.326717	0.331007	0.336256
bfa	Burkina Faso	Low SDI	FALSE	Air pollution DALYs	1.32273e+06	1.31426e+06	1.31208e+06	1.31378e+06	1.31849e+06	1.32326e+06	1.33342e+06	1.32763e+06	1.32234e+06	1.32735e+06	1.36354e+06	1.36172e+06	1.38324e+06	1.38205e+06	1.38376e+06	1.38759e+06	1.38432e+06	1.36692e+06	1.36691e+06	1.36459e+06	1.39008e+06	1.41762e+06	1.46067e+06	1.50738e+06	1.54245e+06	1.59239e+06	1.63506e+06	1.66042e+06	1.67646e+06	1.66767e+06
bfa	Burkina Faso	Low SDI	FALSE	Air pollution deaths	19824.9	19761.5	19825.4	19956.8	20125.6	20302.3	20492.1	20542.2	20582	20805.2	21469.4	21464.2	21908.6	21919.5	22063.4	22227.6	22263.6	22096.5	22214.3	22311.9	22790.2	23209.6	23916.3	24661.5	25223.6	26110.1	26739.7	27290.9	27706	27716.9
bfa	Burkina Faso	Low SDI	FALSE	All cause DALYs	1.15313e+07	1.1706e+07	1.19073e+07	1.20614e+07	1.22427e+07	1.24275e+07	1.31361e+07	1.29443e+07	1.27553e+07	1.28294e+07	1.29606e+07	1.31259e+07	1.31754e+07	1.32275e+07	1.3238e+07	1.32635e+07	1.32584e+07	1.33579e+07	1.33164e+07	1.34262e+07	1.35704e+07	1.37087e+07	1.38856e+07	1.40181e+07	1.40471e+07	1.40901e+07	1.41625e+07	1.42055e+07	1.42616e+07	1.43691e+07
bfa	Burkina Faso	Low SDI	FALSE	All cause deaths	157628	160690	164225	167075	170101	173016	182522	180274	177921	179037	180892	182727	183593	184358	184622	184838	184306	185612	185316	186947	189145	190850	193585	195837	196571	197495	198216	198906	199971	201814
bdi	Burundi	Low SDI	FALSE	PM-equivalent emissions	78.9249	78.656	78.2827	79.0323	85.8342	91.1519	91.429	89.7645	88.2378	89.1525	91.6095	93.4153	92.5356	92.8071	95.9062	96.8899	100.384	102.223	104.266	106.51	108.883	106.68	106.95	108.276	109.077	110.797	113.436	116.753	117.25	117.795
bdi	Burundi	Low SDI	FALSE	Fossil/industrial fraction	0.139724	0.149167	0.153497	0.159784	0.138007	0.132673	0.135104	0.135676	0.143585	0.138184	0.13407	0.13268	0.131255	0.130101	0.134779	0.130843	0.13327	0.134374	0.13129	0.135228	0.139848	0.150367	0.157012	0.161383	0.170282	0.167579	0.168958	0.169331	0.173465	0.177858
bdi	Burundi	Low SDI	FALSE	Air pollution DALYs	644313	630562	611084	615184	610650	600016	583146	570195	559719	549476	541819	531983	542216	548271	555839	565323	566201	565638	561406	559028	566948	564291	569071	572648	565502	550483	534358	532082	550374	553695
bdi	Burundi	Low SDI	FALSE	Air pollution deaths	11320.3	11189.9	10988.3	11075.2	11028.9	10939.2	10728.9	10526.9	10350.5	10141.2	10004.6	9773.27	9861.25	9926.89	10047.9	10197	10193	10171.2	10127.7	10116.7	10303.4	10341.9	10480.6	10580	10555.5	10476.9	10359.8	10447.6	10837.1	11013.8
bdi	Burundi	Low SDI	FALSE	All cause DALYs	6.50274e+06	6.5771e+06	6.61375e+06	6.65575e+06	7.65357e+06	7.70451e+06	7.72278e+06	7.76509e+06	7.63107e+06	7.59549e+06	7.61758e+06	7.4594e+06	7.34618e+06	7.27867e+06	7.14859e+06	7.09017e+06	6.12863e+06	6.05453e+06	6.06269e+06	6.05987e+06	5.9921e+06	5.92746e+06	5.86489e+06	5.81697e+06	5.74727e+06	5.72905e+06	5.67915e+06	5.67421e+06	5.68932e+06	5.69311e+06
bdi	Burundi	Low SDI	FALSE	All cause deaths	95727.1	97593.4	98999.9	100190	115182	116778	117539	118125	115722	114762	114748	111578	109217	107598	104999	103527	88893.6	87369.1	86889	86486.3	85631.9	84750.9	83871.1	83310.7	82672.1	82950.6	82422.6	82480	83012.1	83466.3
cpv	Cabo Verde	Low-middle SDI	FALSE	PM-equivalent emissions	4.43671	4.54172	4.87053	4.8166	5.07527	5.72374	5.39049	5.53165	5.91703	6.21808	6.42441	6.54396	6.68895	6.68058	7.54508	7.99428	7.99089	8.75689	8.34116	8.78046	10.3991	11.9251	11.6566	13.4869	14.1155	14.5065	14.9633	15.2385	15.6356	15.9704
cpv	Cabo Verde	Low-middle SDI	FALSE	Fossil/industrial fraction	0.402616	0.425336	0.476331	0.477705	0.417906	0.446955	0.407451	0.435217	0.466504	0.478223	0.501378	0.499386	0.510662	0.515531	0.560458	0.576777	0.571301	0.607371	0.586241	0.608614	0.671835	0.712644	0.711224	0.749387	0.766183	0.772718	0.778902	0.780567	0.786333	0.790988
cpv	Cabo Verde	Low-middle SDI	FALSE	Air pollution DALYs	14231.2	14002.3	13907.1	14063.1	14309.3	14742.4	14881.1	15100.4	14781.9	14813.5	14250.6	13833.7	13461.7	12934.9	12443.8	11970.3	11250	10594	10022.3	9591.11	9388.82	9427.62	9833.3	10106.5	10419.5	10605.9	10641.2	10501.1	11278.4	11101.2
cpv	Cabo Verde	Low-middle SDI	FALSE	Air pollution deaths	361.467	360.532	360.332	366.298	370.361	375.354	382.748	392.778	386.335	385.446	376.735	370.316	364.18	355.392	347.064	338.781	313.048	296.7	286.225	279.512	278.129	289.722	304.644	317.866	334.702	350.508	366.92	368.936	427.758	419.539
cpv	Cabo Verde	Low-middle SDI	FALSE	All cause DALYs	145577	147931	148801	150362	153889	169410	156800	158961	158592	161389	158272	157163	156516	154997	153414	151523	146675	146968	142108	141765	140403	139628	140610	140208	140471	142379	142346	142990	148323	148256
cpv	Cabo Verde	Low-middle SDI	FALSE	All cause deaths	2509.57	2563.77	2596.07	2653.88	2723.14	2937.16	2827.96	2919.65	2924.63	2972.72	2933.02	2928.46	2931.96	2924.55	2917.24	2901.68	2756.01	2758.07	2694.8	2713.69	2713.68	2760.8	2802.06	2813.93	2862.51	2957.73	3061.89	3112.51	3530.18	3500.55
khm	Cambodia	Low-middle SDI	FALSE	PM-equivalent emissions	654.882	645.946	628.284	626.395	612.735	640.125	607.726	596.56	596.745	612.39	605.269	593.791	641.424	625.233	599.945	625.048	665.574	686.422	726.814	785.53	807.198	817.425	823.368	826.308	835.417	851.155	882.195	888.287	916.419	923.839
khm	Cambodia	Low-middle SDI	FALSE	Fossil/industrial fraction	0.0658882	0.0689671	0.0744237	0.0772982	0.0810889	0.159332	0.157758	0.166265	0.174441	0.174716	0.174604	0.182695	0.167902	0.171202	0.176921	0.177294	0.175991	0.176051	0.172162	0.173915	0.170909	0.175302	0.177796	0.177255	0.182548	0.194217	0.219416	0.222028	0.246546	0.253248
khm	Cambodia	Low-middle SDI	FALSE	Air pollution DALYs	1.4892e+06	1.46893e+06	1.44769e+06	1.42225e+06	1.39366e+06	1.35871e+06	1.31162e+06	1.26003e+06	1.2094e+06	1.15907e+06	1.10135e+06	1.05268e+06	1.01348e+06	964514	917311	873109	829007	793815	761933	732564	713562	691842	678571	661442	651769	640114	627907	615373	608844	603557
khm	Cambodia	Low-middle SDI	FALSE	Air pollution deaths	23009.6	22858.2	22718.7	22575.3	22411.5	22168.4	21746.7	21279.8	20849.3	20417.3	19877.7	19451.6	19127.1	18704.1	18316	17948.2	17580.9	17355.4	17183.1	17058.6	17109.4	17127.1	17171.8	17150.7	17191.8	17213.6	17233.1	17269.4	17451.1	17621.8
khm	Cambodia	Low-middle SDI	FALSE	All cause DALYs	7.89711e+06	7.84908e+06	7.7768e+06	7.74092e+06	7.76439e+06	7.65456e+06	7.56317e+06	7.41835e+06	7.31562e+06	7.1391e+06	7.02332e+06	6.84035e+06	6.6624e+06	6.48332e+06	6.30661e+06	6.12561e+06	5.95699e+06	5.8214e+06	5.67945e+06	5.58693e+06	5.53882e+06	5.45354e+06	5.38471e+06	5.36022e+06	5.33931e+06	5.3374e+06	5.34122e+06	5.34738e+06	5.35394e+06	5.37019e+06
khm	Cambodia	Low-middle SDI	FALSE	All cause deaths	114638	114314	113784	114063	115373	114829	114638	113836	113716	112581	112340	110866	109469	108066	106624	104924	103331	102222	101200	101082	101733	101820	101859	102689	103496	104654	105990	107514	109140	110851
cmr	Cameroon	Low-middle SDI	FALSE	PM-equivalent emissions	635.676	642.068	656.933	688.119	710.136	744.041	771.641	783.162	790.263	794.97	813.358	810.268	810.41	784.752	770.458	741.421	684.502	639.771	627.82	625.216	601.149	605.409	607.97	615.965	625.057	632.718	638.047	643.513	647.01	649.754
cmr	Cameroon	Low-middle SDI	FALSE	Fossil/industrial fraction	0.0944424	0.0901212	0.0870114	0.0844457	0.0883453	0.0847119	0.0841392	0.085465	0.0842738	0.0852495	0.0899242	0.091475	0.0932963	0.0988852	0.104038	0.109987	0.121646	0.144257	0.145259	0.158893	0.17389	0.175125	0.173548	0.179272	0.186248	0.174558	0.17535	0.176135	0.181473	0.18574
cmr	Cameroon	Low-middle SDI	FALSE	Air pollution DALYs	776914	794630	817886	845390	865495	887021	912423	939258	966399	994425	1.02818e+06	1.04995e+06	1.11726e+06	1.1386e+06	1.14827e+06	1.16304e+06	1.17965e+06	1.18105e+06	1.19044e+06	1.21003e+06	1.22906e+06	1.2333e+06	1.23423e+06	1.24392e+06	1.23787e+06	1.20222e+06	1.18618e+06	1.14762e+06	1.13226e+06	1.12864e+06
cmr	Cameroon	Low-middle SDI	FALSE	Air pollution deaths	13255.8	13554	13942.1	14414.5	14789.1	15219	15729.5	16291.6	16885.3	17454.6	18156.8	18585.3	19604.5	20042.4	20343.8	20743.7	21169.8	21237.1	21534.1	21942.3	22372.3	22630.9	22845.7	23159.4	23225.4	23015.3	22771.6	22333.5	22333.3	22432.5
cmr	Cameroon	Low-middle SDI	FALSE	All cause DALYs	8.39495e+06	8.67419e+06	9.0203e+06	9.38017e+06	9.67662e+06	1.00688e+07	1.04967e+07	1.09617e+07	1.14818e+07	1.19662e+07	1.24984e+07	1.30029e+07	1.34883e+07	1.39282e+07	1.42512e+07	1.45072e+07	1.47088e+07	1.48436e+07	1.4884e+07	1.48905e+07	1.48895e+07	1.48945e+07	1.47592e+07	1.47608e+07	1.47897e+07	1.46479e+07	1.43197e+07	1.39773e+07	1.374e+07	1.35325e+07
cmr	Cameroon	Low-middle SDI	FALSE	All cause deaths	116655	120739	125961	131537	136406	142829	149655	157389	166079	174085	182838	190695	198076	204993	209881	213690	216870	218878	219532	219942	220744	221613	220522	221785	223643	222610	217993	212830	209654	207271
can	Canada	High SDI	TRUE	PM-equivalent emissions	7032.27	6764.98	6540.44	6592.22	6396.12	6437.53	6342.59	6500.24	6555.57	6527.81	6498.91	6406.34	6361.6	6008.64	5875.15	5947.62	5754.04	5605.62	5521.41	5362.62	5505.16	5358.39	5296.11	5257.48	5152.61	5048.06	5017.12	4949.64	4819.08	4729.71
can	Canada	High SDI	TRUE	Fossil/industrial fraction	0.679036	0.6652	0.670935	0.649449	0.645907	0.668852	0.689122	0.681255	0.682082	0.674758	0.680701	0.679241	0.66474	0.685258	0.689611	0.662377	0.626523	0.637053	0.600305	0.549477	0.515561	0.501973	0.49616	0.492201	0.482451	0.471668	0.469301	0.464487	0.450342	0.439998
can	Canada	High SDI	TRUE	Air pollution DALYs	141735	140012	139071	139941	139764	139861	137456	135465	133367	130014	126813	125139	125860	124186	122395	120445	117071	112879	106924	100950	95778.9	92729.8	90193.8	88002.4	86879.1	86580.5	88605.6	89364.2	92929.3	92170.2
can	Canada	High SDI	TRUE	Air pollution deaths	6276.58	6250.65	6259.8	6348.42	6397.32	6461.78	6399.92	6365.24	6327.11	6170.77	6018.48	5938.16	6011.31	5909	5816.86	5705.76	5532.14	5308.22	5001.04	4699.69	4444.94	4324	4206.03	4111.19	4076.63	4063.76	4131.57	4129.49	4384.35	4380.71
can	Canada	High SDI	TRUE	All cause DALYs	7.26068e+06	7.32552e+06	7.40119e+06	7.51853e+06	7.58857e+06	7.66906e+06	7.6899e+06	7.70182e+06	7.74333e+06	7.77714e+06	7.80663e+06	7.86025e+06	7.93847e+06	8.02379e+06	8.08216e+06	8.17965e+06	8.2437e+06	8.37106e+06	8.4762e+06	8.54909e+06	8.62076e+06	8.68772e+06	8.81521e+06	8.93178e+06	9.08235e+06	9.2098e+06	9.41062e+06	9.58884e+06	9.82057e+06	9.98304e+06
can	Canada	High SDI	TRUE	All cause deaths	190371	192917	195830	200842	203821	207406	209267	210940	213292	214188	214555	215898	218656	221034	221997	224340	224996	228646	231107	232021	233751	235693	240120	244466	250744	255203	261080	267187	280110	288193
caf	Central African Republic	Low SDI	FALSE	PM-equivalent emissions	1851.3	1870.59	1880.15	1954.36	1987.54	2040.45	2048.83	2038.37	2060.54	2053.52	2076.14	2070.52	2072.17	2014.77	1947.55	1881.03	1856.68	1822.82	1770.44	1754.94	1730.97	1733.17	1732.94	1732.75	1732.65	1733.56	1734.61	1735.89	1736.38	1736.96
caf	Central African Republic	Low SDI	FALSE	Fossil/industrial fraction	0.00743164	0.00783181	0.00794484	0.00783773	0.00800859	0.00804968	0.00832145	0.00865077	0.00893374	0.00925251	0.00950809	0.00994311	0.0101248	0.0106029	0.0112074	0.0118132	0.0123348	0.013595	0.0144443	0.0150266	0.0156829	0.016665	0.0167655	0.0168007	0.017151	0.0175542	0.0179187	0.0182579	0.0185541	0.0188955
caf	Central African Republic	Low SDI	FALSE	Air pollution DALYs	385076	388330	393891	403184	409879	416080	426224	433145	441357	450974	453515	456731	458744	460532	463371	467559	479652	484969	487473	493117	498367	493201	481933	477271	469892	463475	457523	454258	447351	440872
caf	Central African Republic	Low SDI	FALSE	Air pollution deaths	6304.29	6368.58	6424.2	6563.1	6668.61	6767.27	6936.96	7033.78	7156.67	7295.21	7329.55	7385.32	7439.15	7485.16	7547.56	7623.65	7793.56	7879.11	7927.76	8037.46	8173.14	8169.89	8072.05	8073.14	8020.23	7993.48	7965.63	7976.69	7941.39	7918.64
caf	Central African Republic	Low SDI	FALSE	All cause DALYs	3.26091e+06	3.38652e+06	3.5402e+06	3.70412e+06	3.85697e+06	4.01203e+06	4.17174e+06	4.3144e+06	4.4184e+06	4.52877e+06	4.61928e+06	4.69801e+06	4.74884e+06	4.79575e+06	4.85109e+06	4.88169e+06	4.90907e+06	4.91932e+06	4.88501e+06	4.89164e+06	4.91728e+06	4.90508e+06	4.83713e+06	5.09629e+06	5.09082e+06	4.68809e+06	4.60706e+06	4.63071e+06	4.47626e+06	4.40367e+06
caf	Central African Republic	Low SDI	FALSE	All cause deaths	47252.3	49222.2	51616.5	54385	57075.8	59725.2	62344.9	64613.7	66246	67896.5	69301.5	70396.7	71163.4	71799.5	72531.7	72912.9	73226.2	73209.6	72471.8	72477	72954.2	73037.4	72408.4	76793.4	77136.2	71202.6	70181.4	70893.7	68669.4	67754.8
tcd	Chad	Low SDI	FALSE	PM-equivalent emissions	433.465	435.303	435.357	429.926	436.726	448.011	447.967	456.714	466.729	477.46	483.863	490.13	496.583	506.767	506.729	504.107	506.634	502.23	493.664	480.656	470.354	474.34	476.022	477.354	480.563	480.727	484.431	488.986	490.698	492.411
tcd	Chad	Low SDI	FALSE	Fossil/industrial fraction	0.0577091	0.0557541	0.0572683	0.0582689	0.058337	0.0588913	0.0608668	0.0642576	0.0654753	0.0661333	0.0677265	0.0696232	0.070355	0.074127	0.0770443	0.080919	0.0821887	0.0870973	0.0909128	0.0949031	0.100466	0.102826	0.104985	0.106126	0.112855	0.109567	0.111734	0.113959	0.117236	0.120482
tcd	Chad	Low SDI	FALSE	Air pollution DALYs	911891	921856	935998	959881	981065	1.00603e+06	1.03964e+06	1.07074e+06	1.10259e+06	1.12955e+06	1.16419e+06	1.19113e+06	1.21983e+06	1.23945e+06	1.2394e+06	1.23205e+06	1.25487e+06	1.27965e+06	1.28753e+06	1.29606e+06	1.30069e+06	1.30206e+06	1.30188e+06	1.31835e+06	1.31672e+06	1.33083e+06	1.33582e+06	1.34512e+06	1.3551e+06	1.36368e+06
tcd	Chad	Low SDI	FALSE	Air pollution deaths	14264.6	14400.5	14644.2	15013.4	15331.3	15691.9	16228.3	16686	17120.2	17500	17948.7	18329.2	18768.8	19090	19154.2	19064.5	19375	19724	19907.7	20108.6	20241.6	20350.6	20432	20662.5	20705.3	20944.6	21071.6	21276.7	21509.4	21709.5
tcd	Chad	Low SDI	FALSE	All cause DALYs	7.20036e+06	7.3851e+06	7.517e+06	7.64586e+06	7.85596e+06	8.0585e+06	8.33695e+06	8.64444e+06	8.93188e+06	9.13968e+06	9.47662e+06	9.65762e+06	9.87808e+06	1.00903e+07	1.02144e+07	1.02754e+07	1.05102e+07	1.04555e+07	1.05903e+07	1.06151e+07	1.06804e+07	1.08165e+07	1.08709e+07	1.09589e+07	1.10302e+07	1.1106e+07	1.11771e+07	1.1343e+07	1.14724e+07	1.15833e+07
tcd	Chad	Low SDI	FALSE	All cause deaths	98724.5	101070	103230	105032	108154	110984	115023	119377	123394	126358	130867	133046	135948	138645	140238	140693	143696	142554	144108	144154	144814	146599	147397	148462	149400	150235	151104	153419	155161	156649
chl	Chile	High-middle SDI	TRUE	PM-equivalent emissions	2811.26	2695.89	2677.79	2691.84	2652.42	2732.58	2810.72	2812.63	2696.41	2663.72	2508.22	2344.14	2099.79	2001.21	1848.13	1731.44	1661.05	1527.66	1385.2	1223.05	1193.95	1220.14	1179.9	1159.35	1045.67	1072.92	1108.3	1126.75	1126.38	1104.39
chl	Chile	High-middle SDI	TRUE	Fossil/industrial fraction	0.939736	0.934198	0.929872	0.932594	0.927106	0.928496	0.93048	0.935835	0.93027	0.929133	0.923868	0.922375	0.915778	0.917947	0.914225	0.908067	0.900372	0.887352	0.873617	0.854056	0.859481	0.847747	0.816126	0.801202	0.783227	0.797203	0.79915	0.807081	0.808558	0.806208
chl	Chile	High-middle SDI	TRUE	Air pollution DALYs	155886	146028	140381	138020	135961	136194	134830	130628	130458	129616	125627	126767	123719	123859	123289	121597	121698	123658	123492	128048	130696	132397	135375	139839	142911	144991	140802	140487	144244	150403
chl	Chile	High-middle SDI	TRUE	Air pollution deaths	5788.99	5512.13	5347.4	5330.35	5281.84	5341.16	5347.98	5214	5234.09	5250.12	5068.07	5116.16	5008.45	5033.78	5012.16	4929.68	4901.42	4961.91	4897.66	5088.47	5263.55	5326.55	5462.53	5651.32	5771.26	5896.92	5731.83	5766.78	5958.85	6244.42
chl	Chile	High-middle SDI	TRUE	All cause DALYs	3.60614e+06	3.53281e+06	3.49019e+06	3.51207e+06	3.52634e+06	3.5795e+06	3.60493e+06	3.59216e+06	3.61831e+06	3.63474e+06	3.62629e+06	3.69454e+06	3.69431e+06	3.75068e+06	3.80451e+06	3.82005e+06	3.84175e+06	3.88367e+06	3.90467e+06	3.99624e+06	4.06798e+06	4.06652e+06	4.10001e+06	4.15717e+06	4.21021e+06	4.26787e+06	4.28859e+06	4.37832e+06	4.44899e+06	4.51694e+06
chl	Chile	High-middle SDI	TRUE	All cause deaths	75861.8	74142.5	73208.3	74412.5	75125.1	77271	78598.2	78154.7	79103.8	80124.5	79365.6	81297.1	81470.2	83649.1	85384.8	85635	86030.2	87510.1	87654.3	91372.1	94886.4	95190.5	96729.6	98836.3	100364	102577	103139	107012	110087	113086
chn	China	High-middle SDI	TRUE	PM-equivalent emissions	34451	35343.8	36602.1	38514.1	40023.6	42960.8	43769.1	42575.5	42125.8	41187.2	43006.3	44018.2	46248.4	51611.3	58360.1	63996.7	66550.2	66923.2	64662.5	62351	60001.7	62653.1	62153.1	58127.3	51535.6	46925.7	42440.9	39322.9	38655.4	38225.2
chn	China	High-middle SDI	TRUE	Fossil/industrial fraction	0.855187	0.857953	0.86199	0.867316	0.87176	0.880276	0.882149	0.87828	0.876496	0.872741	0.879172	0.884174	0.889405	0.902779	0.915527	0.92376	0.926022	0.928877	0.929137	0.927188	0.924072	0.929105	0.929953	0.926748	0.916476	0.910192	0.901234	0.892954	0.891701	0.891208
chn	China	High-middle SDI	TRUE	Air pollution DALYs	6.09053e+07	6.02031e+07	5.92027e+07	5.78611e+07	5.63571e+07	5.48299e+07	5.34214e+07	5.17758e+07	5.04078e+07	4.96485e+07	4.9336e+07	4.85318e+07	4.81028e+07	4.77097e+07	4.77661e+07	4.68609e+07	4.52163e+07	4.42481e+07	4.40737e+07	4.39861e+07	4.41732e+07	4.41795e+07	4.3907e+07	4.36817e+07	4.3541e+07	4.36584e+07	4.35709e+07	4.28655e+07	4.23855e+07	4.25097e+07
chn	China	High-middle SDI	TRUE	Air pollution deaths	1.89577e+06	1.89671e+06	1.89857e+06	1.89379e+06	1.87448e+06	1.85483e+06	1.84486e+06	1.82315e+06	1.8051e+06	1.81946e+06	1.84945e+06	1.85789e+06	1.87557e+06	1.89307e+06	1.92349e+06	1.90627e+06	1.84304e+06	1.81341e+06	1.82524e+06	1.84302e+06	1.87063e+06	1.87404e+06	1.85411e+06	1.84536e+06	1.84422e+06	1.84857e+06	1.85658e+06	1.84044e+06	1.82824e+06	1.84827e+06
chn	China	High-middle SDI	TRUE	All cause DALYs	4.12311e+08	4.11145e+08	4.07011e+08	4.02101e+08	3.98614e+08	3.94559e+08	3.89731e+08	3.83438e+08	3.79762e+08	3.77164e+08	3.76675e+08	3.73057e+08	3.70279e+08	3.69057e+08	3.71147e+08	3.68469e+08	3.61757e+08	3.58311e+08	3.63128e+08	3.60269e+08	3.6226e+08	3.62244e+08	3.61854e+08	3.62128e+08	3.6344e+08	3.65828e+08	3.71294e+08	3.74277e+08	3.77357e+08	3.82206e+08
chn	China	High-middle SDI	TRUE	All cause deaths	8.34836e+06	8.40376e+06	8.41836e+06	8.42278e+06	8.40463e+06	8.38778e+06	8.38489e+06	8.34091e+06	8.35679e+06	8.4639e+06	8.65329e+06	8.72869e+06	8.83946e+06	8.9803e+06	9.19486e+06	9.2159e+06	9.02123e+06	8.97896e+06	9.19573e+06	9.29753e+06	9.50494e+06	9.58339e+06	9.57915e+06	9.6261e+06	9.71721e+06	9.80809e+06	1.00355e+07	1.01955e+07	1.0377e+07	1.06534e+07
col	Colombia	Middle SDI	TRUE	PM-equivalent emissions	860.112	875.878	877.278	890.955	903.382	963.331	946.697	908.801	906.428	860.343	876.597	870.113	860.622	868.217	837.363	822.084	824.968	832.222	812.058	836.625	868.996	879.19	928.254	983.129	995.528	968.802	1050.07	943.366	935.097	1001.47
col	Colombia	Middle SDI	TRUE	Fossil/industrial fraction	0.585907	0.601147	0.624359	0.622796	0.618195	0.622479	0.619543	0.667247	0.6581	0.622576	0.63991	0.648845	0.637196	0.634195	0.645346	0.663193	0.673501	0.674135	0.681535	0.693535	0.707982	0.715097	0.728255	0.679531	0.676315	0.670412	0.703546	0.687936	0.687329	0.709915
col	Colombia	Middle SDI	TRUE	Air pollution DALYs	576550	586774	585635	582428	576404	566773	567533	544866	531531	532542	522958	512497	530620	499893	486692	469290	473711	462821	462658	470831	463020	443631	437550	427217	416867	416034	411290	409507	415011	421010
col	Colombia	Middle SDI	TRUE	Air pollution deaths	15177.1	15748.5	15893.1	15885.4	15906.6	15859.2	16127.4	15491.4	15235.1	15539.2	15500.9	15525.2	16654.8	15703	15411.2	14906.3	15288	15077.9	15299	15799.8	15757.6	15221.8	15176	14955	14707.2	14866.6	14903.7	14917.4	15363	15711.1
col	Colombia	Middle SDI	TRUE	All cause DALYs	1.04121e+07	1.09225e+07	1.11316e+07	1.11038e+07	1.11599e+07	1.11318e+07	1.12361e+07	1.11717e+07	1.122e+07	1.13908e+07	1.15568e+07	1.1695e+07	1.24077e+07	1.14798e+07	1.14227e+07	1.11577e+07	1.11921e+07	1.10403e+07	1.10494e+07	1.12198e+07	1.11603e+07	1.09177e+07	1.09091e+07	1.09015e+07	1.08611e+07	1.09955e+07	1.11203e+07	1.13528e+07	1.14665e+07	1.15675e+07
col	Colombia	Middle SDI	TRUE	All cause deaths	169638	180762	185085	184664	185970	185930	189468	186726	187761	193168	197881	202770	223286	204911	204930	199002	202825	200794	203967	211485	212458	207738	209898	212070	213700	221165	227096	233825	240621	246679
com	Comoros	Low SDI	FALSE	PM-equivalent emissions	6.15502	6.1656	6.07908	6.15542	6.7444	7.04651	6.98165	6.75529	6.91147	7.11307	7.05004	7.30148	7.4357	7.604	7.88264	8.45944	8.52171	8.93565	9.09616	9.18441	9.30705	9.6287	9.60652	9.70442	9.57627	9.73683	9.87187	10.052	10.1149	10.1808
com	Comoros	Low SDI	FALSE	Fossil/industrial fraction	0.196431	0.19955	0.201253	0.200512	0.187406	0.185782	0.176405	0.184235	0.20022	0.210082	0.21275	0.218627	0.216282	0.216976	0.21742	0.238421	0.220084	0.239329	0.237747	0.237355	0.24617	0.263273	0.26871	0.279438	0.281613	0.287405	0.28959	0.291351	0.296268	0.301304
com	Comoros	Low SDI	FALSE	Air pollution DALYs	51699.1	51581.6	52120.9	51411.1	51324.9	50482	49560.3	48086.3	46080.5	44489.6	43635.1	41906.1	40428.4	38583.1	37327.2	36680.5	35185.9	35699.9	35171.5	33329.4	31483.5	31108.4	30109.3	29032.2	29812.8	28937.1	27906.5	27065.8	25953.7	25255.1
com	Comoros	Low SDI	FALSE	Air pollution deaths	844.358	846.206	863.174	859.443	866.942	863.171	857.916	843.885	816.656	796.111	790.726	769.992	751.231	725.412	704.123	702.025	682.463	701.31	703.176	679.945	661.328	665.979	662.089	656.106	680.614	675.55	666.687	660.833	649.803	646.41
com	Comoros	Low SDI	FALSE	All cause DALYs	358392	358781	357919	356487	356023	354152	364011	353731	354333	342565	344748	331815	330307	319367	314102	310515	306468	305751	295461	301717	287641	290956	282352	277003	270840	267441	264705	262175	259938	259072
com	Comoros	Low SDI	FALSE	All cause deaths	5380.27	5417.56	5436.8	5449.83	5479.94	5489.77	5705.76	5560.71	5590.88	5418.35	5451.11	5299.15	5291.86	5158.5	5110.16	5093.86	5083.01	5113.47	5005	5174.36	4974.1	5101.73	5008.46	4977.33	4923.47	4921.36	4923.96	4938.69	4963.74	5006.84
cog	Congo	Low-middle SDI	FALSE	PM-equivalent emissions	203.258	203.057	206.205	212.206	210.369	207.017	214.339	212.665	211.198	208.362	206.429	208.393	201.282	193.434	189.548	193.696	198.852	197.31	212.686	218.036	224.585	241.525	243.923	248.345	249.894	249.694	246.082	246.039	247.211	248.139
cog	Congo	Low-middle SDI	FALSE	Fossil/industrial fraction	0.0598761	0.0624685	0.058364	0.0569332	0.046532	0.0566631	0.0521539	0.0499721	0.0549448	0.0578271	0.0632004	0.0696637	0.0613647	0.0788045	0.0863949	0.0880974	0.0991067	0.106869	0.123173	0.122958	0.131085	0.131371	0.133432	0.145795	0.147988	0.150255	0.133223	0.128211	0.132799	0.136457
cog	Congo	Low-middle SDI	FALSE	Air pollution DALYs	163217	162554	163299	165146	169858	172289	175262	179021	177453	178039	175855	171753	169417	170092	169485	169858	168862	168451	167501	165555	162777	160076	158023	155225	152830	148632	143531	139446	137678	136767
cog	Congo	Low-middle SDI	FALSE	Air pollution deaths	3346.57	3336.44	3350.03	3395.76	3507.73	3570.26	3644.58	3706.66	3658.31	3659.49	3600.58	3511.13	3458.17	3493.86	3505.8	3517.94	3525.57	3539.44	3550.32	3534.06	3509.46	3495.58	3509.67	3510.98	3516.29	3481.51	3430.67	3402.66	3430.02	3470.35
cog	Congo	Low-middle SDI	FALSE	All cause DALYs	1.91253e+06	1.98168e+06	2.04344e+06	2.14931e+06	2.21036e+06	2.27621e+06	2.34846e+06	3.10113e+06	2.70616e+06	2.54206e+06	2.51849e+06	2.48072e+06	2.48401e+06	2.48388e+06	2.46166e+06	2.43373e+06	2.40277e+06	2.38517e+06	2.34447e+06	2.30825e+06	2.29154e+06	2.25398e+06	2.25361e+06	2.22398e+06	2.20345e+06	2.15863e+06	2.11139e+06	2.08646e+06	2.07382e+06	2.06475e+06
cog	Congo	Low-middle SDI	FALSE	All cause deaths	30406.1	31526.7	32536.5	34404.7	35520.7	36739.3	38053.7	49271.5	43192.9	40661.9	40167.7	39472.5	39351.4	39454.4	39143.9	38652.9	38230.2	38073.9	37527.5	36960.3	36776.1	36343.3	36658.3	36511.3	36509.1	36008.2	35471.9	35414.8	35546.8	35712.8
cri	Costa Rica	Middle SDI	FALSE	PM-equivalent emissions	88.3332	88.6592	98.2887	91.6293	93.7948	102.613	100.867	91.6797	98.0909	96.2507	95.0295	98.332	101.788	92.2666	101.182	106.063	110.751	118.452	110.17	102.453	105.821	108.316	105.381	109.298	103.36	91.2025	93.9315	91.6448	92.972	92.3795
cri	Costa Rica	Middle SDI	FALSE	Fossil/industrial fraction	0.631419	0.629938	0.684528	0.767577	0.771872	0.786554	0.77681	0.795175	0.828111	0.818429	0.788288	0.787852	0.775508	0.725211	0.729859	0.706798	0.698286	0.707339	0.696229	0.676135	0.670025	0.704545	0.700381	0.69728	0.682636	0.650796	0.668705	0.671134	0.677562	0.677192
cri	Costa Rica	Middle SDI	FALSE	Air pollution DALYs	26110.4	25500.4	25132.8	24401.4	24883.3	25432.4	24368	24765	24632.1	24944	23945.6	24476.1	23859.7	23973.3	23964.8	22755.4	23907.6	22388.6	22991.3	22974	25746.5	25391.8	25880.6	26467.2	27000.7	28093.9	29003.3	28695.3	29378.1	29850.8
cri	Costa Rica	Middle SDI	FALSE	Air pollution deaths	836.759	828.55	822.886	804.41	832.252	860.07	829.035	840.527	848.564	871.002	843.296	862.985	825.799	839.357	838.099	776.694	814.178	738.209	763.119	757.54	872.984	856.416	881.049	907.358	932.35	979.796	1023.42	1012.3	1046.85	1067.7
cri	Costa Rica	Middle SDI	FALSE	All cause DALYs	642817	658878	676627	687466	715644	744365	745450	769179	777560	796118	788210	807660	812934	826737	839954	829384	866096	843124	865684	873310	937339	931416	945328	959728	976415	1.00934e+06	1.05253e+06	1.06743e+06	1.07698e+06	1.08981e+06
cri	Costa Rica	Middle SDI	FALSE	All cause deaths	11391.6	11837.8	12287.9	12534.6	13346.7	14105.7	13969.9	14418.6	14703.2	15255.1	15063.8	15523.1	15370.1	15853.9	16316.7	15687.6	16724.9	15644.6	16390.2	16591.6	18845.7	18562.8	19013.1	19599.8	20197.9	21338.6	22800	23366	23901	24415.7
civ	CÙte d'Ivoire	Low SDI	FALSE	PM-equivalent emissions	385.926	398.865	404.825	434.77	456.603	465.076	477.67	498.085	494.59	500.267	501.403	498.635	499.463	464.001	481.256	471.047	452.414	438.355	435.122	419.848	423.102	443.412	466.028	467.244	478.106	449.021	439.059	451.798	455.47	458.686
civ	CÙte d'Ivoire	Low SDI	FALSE	Fossil/industrial fraction	0.13773	0.152917	0.158825	0.151916	0.156183	0.150094	0.152102	0.160685	0.154689	0.175137	0.171847	0.171237	0.171304	0.156031	0.166439	0.174977	0.165709	0.172701	0.177641	0.17669	0.181947	0.174319	0.208116	0.203315	0.214859	0.242491	0.231043	0.238228	0.244819	0.250523
civ	CÙte d'Ivoire	Low SDI	FALSE	Air pollution DALYs	1.30365e+06	1.33064e+06	1.36884e+06	1.41924e+06	1.47625e+06	1.52633e+06	1.55262e+06	1.57636e+06	1.60203e+06	1.61427e+06	1.62657e+06	1.63602e+06	1.64228e+06	1.6456e+06	1.64848e+06	1.64231e+06	1.65082e+06	1.63266e+06	1.60616e+06	1.58989e+06	1.57159e+06	1.54911e+06	1.55042e+06	1.56501e+06	1.5509e+06	1.53137e+06	1.44487e+06	1.37393e+06	1.33933e+06	1.2953e+06
civ	CÙte d'Ivoire	Low SDI	FALSE	Air pollution deaths	19081.8	19561.5	20217.8	21048.1	21963.2	22817.1	23323.2	23750.5	24229.8	24554.2	24939.6	25167.4	25399.1	25538.6	25713.3	25732.8	25943	25731.7	25502.1	25436.9	25381.8	25275.7	25456.1	25863.7	25781	25692.7	24535.7	23700.9	23503	23053.1
civ	CÙte d'Ivoire	Low SDI	FALSE	All cause DALYs	1.09106e+07	1.14657e+07	1.20969e+07	1.28e+07	1.35607e+07	1.43061e+07	1.48288e+07	1.52994e+07	1.57278e+07	1.60385e+07	1.62172e+07	1.6361e+07	1.65527e+07	1.66447e+07	1.66155e+07	1.6446e+07	1.61379e+07	1.58402e+07	1.54744e+07	1.52966e+07	1.52234e+07	1.51781e+07	1.46809e+07	1.44643e+07	1.4211e+07	1.3844e+07	1.34188e+07	1.30311e+07	1.26771e+07	1.24264e+07
civ	CÙte d'Ivoire	Low SDI	FALSE	All cause deaths	143108	151844	162075	173570	185984	198375	207408	215422	222842	228627	232493	235043	238086	239778	239610	236651	231663	227163	221752	219440	219244	219007	212244	209646	206046	200662	194758	189571	185081	182433
hrv	Croatia	High SDI	FALSE	PM-equivalent emissions	312.551	223.344	220.186	227.675	211.361	190.23	180.418	197.231	214.196	214.379	170.8	173.322	177.929	184.226	172.346	178.257	171.065	176.629	166.378	161.365	138.851	130.257	121.645	111.897	100.09	107.774	103.354	98.5837	96.0671	94.5226
hrv	Croatia	High SDI	FALSE	Fossil/industrial fraction	0.887637	0.794533	0.814718	0.808762	0.816691	0.78339	0.744489	0.782135	0.799953	0.80368	0.777807	0.764798	0.777974	0.758982	0.746885	0.752761	0.760245	0.77395	0.76139	0.743362	0.684763	0.67561	0.653607	0.635025	0.64211	0.625666	0.61968	0.616113	0.611006	0.609592
hrv	Croatia	High SDI	FALSE	Air pollution DALYs	130947	127220	126049	124972	122921	122312	122256	122196	117573	113854	108263	105625	104838	104907	99911.4	99707.1	95784.1	95323.2	94008.3	88687.7	85487.4	82798.4	80908.5	76848.4	75992.4	76948.8	69902.9	68077.4	68330.4	69108.5
hrv	Croatia	High SDI	FALSE	Air pollution deaths	5586.89	5435.63	5357.34	5307.3	5220.74	5239.39	5254	5262.95	5089.52	4941.39	4725.77	4629.38	4654.54	4709.59	4510.48	4531.53	4388.18	4407.4	4355.66	4126.76	4020.5	3913	3838.09	3661.47	3645.67	3727.91	3378.15	3314.05	3343.44	3389.88
hrv	Croatia	High SDI	FALSE	All cause DALYs	1.77778e+06	1.82942e+06	1.78877e+06	1.7637e+06	1.71531e+06	1.75213e+06	1.7158e+06	1.72038e+06	1.68963e+06	1.66523e+06	1.62172e+06	1.60167e+06	1.5998e+06	1.60921e+06	1.57057e+06	1.58412e+06	1.55906e+06	1.57526e+06	1.58582e+06	1.54594e+06	1.53057e+06	1.514e+06	1.50732e+06	1.4763e+06	1.48159e+06	1.51291e+06	1.46242e+06	1.46693e+06	1.46894e+06	1.47617e+06
hrv	Croatia	High SDI	FALSE	All cause deaths	52335.2	54601	52735.8	51015.9	50038.3	51383.4	51467.5	52295.5	51752.5	51271.2	50040.7	49533.4	50149.8	51117.7	49722.1	50804.1	50193.9	51397.1	52179.6	50873.6	51053.7	50734.6	50844.7	49772.3	50583	52838.7	50507.4	51219.2	51619.1	52311.4
cub	Cuba	Middle SDI	FALSE	PM-equivalent emissions	842.86	696.603	613.279	532.838	548.564	561.559	605.213	654.418	641.421	647.487	655.019	648.261	612.081	583.363	555.824	548.747	548.212	549.035	521.492	586.978	668.79	614.148	641.188	582.773	578.814	582.056	580.696	558.54	570.303	559.031
cub	Cuba	Middle SDI	FALSE	Fossil/industrial fraction	0.750601	0.733984	0.701733	0.744194	0.754083	0.796097	0.79103	0.817499	0.835402	0.823518	0.82054	0.812592	0.826382	0.837895	0.832095	0.862959	0.864516	0.867913	0.862953	0.879342	0.901044	0.882857	0.884121	0.876576	0.862981	0.862171	0.878877	0.859002	0.862588	0.860487
cub	Cuba	Middle SDI	FALSE	Air pollution DALYs	137215	134839	135859	137299	138277	138239	138090	139368	142900	144368	141541	140837	132693	132611	131720	133016	126871	126941	127703	128288	130006	126094	133067	139031	144729	152116	148254	147455	146566	143099
cub	Cuba	Middle SDI	FALSE	Air pollution deaths	5431.81	5394.12	5532.51	5660.07	5684.61	5678.73	5720.47	5746.68	5872.25	5968.32	5872.77	5887.58	5509.72	5562.81	5588.76	5651.6	5330.3	5316.2	5381.62	5416.39	5511.15	5311.86	5611.75	5892.53	6175.01	6530.3	6359.27	6373.86	6355.9	6144.22
cub	Cuba	Middle SDI	FALSE	All cause DALYs	2.97753e+06	2.98656e+06	3.01167e+06	3.04956e+06	3.07849e+06	3.07242e+06	3.03257e+06	3.02322e+06	3.04346e+06	3.0421e+06	3.01172e+06	3.01774e+06	2.9519e+06	2.98684e+06	3.01066e+06	3.06137e+06	2.99411e+06	3.02343e+06	3.06698e+06	3.10566e+06	3.14643e+06	3.09351e+06	3.17832e+06	3.2255e+06	3.27732e+06	3.37208e+06	3.39205e+06	3.47306e+06	3.50493e+06	3.48101e+06
cub	Cuba	Middle SDI	FALSE	All cause deaths	70607.5	71649.5	74246.4	76770.1	77758.8	77825.6	77578.3	77073.1	77792.7	78404.7	77800.9	79076.8	76322.5	78813.8	80941.5	83291.8	80208.3	81514.4	84104.6	86038.8	88244.2	85618.6	89252.3	91819	94952.7	99556.6	100877	105582	107605	105984
cyp	Cyprus	High SDI	FALSE	PM-equivalent emissions	55.5503	57.1144	63.968	65.6199	69.2641	68.1321	72.392	75.2306	78.5961	86.7707	88.9797	87.2077	81.5957	82.7639	67.9151	88.1735	78.5188	73.5799	63.9549	55.8828	56.7376	58.2488	51.3841	48.0352	51.3143	47.7998	54.7652	51.8662	50.8461	50.7105
cyp	Cyprus	High SDI	FALSE	Fossil/industrial fraction	0.955041	0.954845	0.956312	0.956183	0.95502	0.954251	0.954557	0.956751	0.956402	0.958846	0.958994	0.957608	0.954083	0.956974	0.950713	0.990299	0.990849	0.987537	0.984989	0.982283	0.981812	0.985571	0.985651	0.983688	0.979949	0.974989	0.9766	0.970254	0.970231	0.970692
cyp	Cyprus	High SDI	FALSE	Air pollution DALYs	9027.25	9509.86	9883.41	10124.1	10167.4	10253.8	10231.3	10281.2	10367.6	10378.4	10228.8	10027	9954.74	9873.57	9938.71	10034.5	10214.4	10368.3	10348.5	10334.6	10224.3	9960.76	9818.65	9781.32	9777.24	9736.4	9203.49	8921.44	9278.53	9840.94
cyp	Cyprus	High SDI	FALSE	Air pollution deaths	409.31	438.043	461.773	474.431	473.54	476.24	473.181	474.42	479.969	481.132	470.273	459.092	455.127	449.066	452.743	459.475	472.998	479.612	478.464	476.567	474.585	461.807	454.965	452.122	453.127	452.717	425.341	410.008	429.029	457.992
cyp	Cyprus	High SDI	FALSE	All cause DALYs	211528	216334	220427	223038	224290	226293	227863	230358	235577	235875	236512	236868	239474	241567	246181	253180	256864	261796	263376	265701	267068	269281	271941	277177	283913	290384	295229	301210	311344	320702
cyp	Cyprus	High SDI	FALSE	All cause deaths	5718.3	5993.83	6232.06	6334.65	6313.96	6342.85	6336.88	6389.55	6578.13	6594.87	6507.66	6434.25	6468.54	6481.42	6615.61	6855.69	7047.46	7186.75	7164.02	7177.48	7210.86	7211.96	7246.99	7370.6	7592.91	7808.05	7882.06	7993.93	8339.04	8707.45
cze	Czechia	High SDI	TRUE	PM-equivalent emissions	2392.41	2244.15	1934.46	1814.88	1584.06	1420.93	1242.53	1010.81	728.406	524.672	532.166	517.574	503.463	508.74	502.998	487.56	482.847	484.056	436.615	423.624	422.823	415.889	395.639	385.166	372.572	368.03	348.133	341.503	322.282	297.3
cze	Czechia	High SDI	TRUE	Fossil/industrial fraction	0.983024	0.981794	0.974417	0.974003	0.973651	0.974238	0.969951	0.960149	0.94272	0.917215	0.918069	0.909554	0.903035	0.901637	0.894834	0.888996	0.884153	0.877747	0.859065	0.845943	0.837327	0.830917	0.816507	0.805942	0.7949	0.788551	0.775749	0.770278	0.759635	0.742684
cze	Czechia	High SDI	TRUE	Air pollution DALYs	308345	291961	281858	266404	258328	254024	238903	230547	213344	204063	198768	195066	190308	191824	184091	180918	174395	173388	173218	171782	170484	168820	164495	159418	151790	149245	144342	142297	145380	146225
cze	Czechia	High SDI	TRUE	Air pollution deaths	13622.2	12889.4	12408.9	11781.9	11458	11350	10624.1	10260.6	9504.01	9119.52	8932.62	8801.65	8598.49	8700.58	8302.21	8182.16	7850.98	7772.77	7768.25	7712.81	7664.76	7608.11	7426.76	7204.44	6843.67	6759.53	6527.46	6440.19	6606.04	6606.62
cze	Czechia	High SDI	TRUE	All cause DALYs	3.99891e+06	3.88776e+06	3.82305e+06	3.71433e+06	3.68217e+06	3.67792e+06	3.57729e+06	3.57963e+06	3.48349e+06	3.46114e+06	3.46506e+06	3.44818e+06	3.44321e+06	3.50277e+06	3.44147e+06	3.43762e+06	3.38167e+06	3.38529e+06	3.40161e+06	3.39565e+06	3.40027e+06	3.40766e+06	3.40485e+06	3.40163e+06	3.36763e+06	3.39738e+06	3.40856e+06	3.429e+06	3.4607e+06	3.45544e+06
cze	Czechia	High SDI	TRUE	All cause deaths	128789	123778	120759	116760	115736	116662	112218	112392	108558	108027	108721	108176	107882	110623	107306	107360	104487	104188	105016	105090	105832	106851	107442	107938	106854	109204	109816	111138	113575	113803
prk	Democratic People's Republic of Korea	Low-middle SDI	TRUE	PM-equivalent emissions	934.249	862.733	816.548	775.804	700.671	692.769	643.628	601.109	596.477	598.679	638.288	653.121	616.693	620.864	630.941	644.356	639.105	579.597	610.964	523.86	492.712	432.726	435.878	389.199	397.262	375.496	390.806	357.035	410.142	408.331
prk	Democratic People's Republic of Korea	Low-middle SDI	TRUE	Fossil/industrial fraction	0.895781	0.885108	0.854256	0.841279	0.820723	0.816121	0.794914	0.78451	0.787559	0.787942	0.800637	0.807293	0.826424	0.831216	0.833476	0.841534	0.847241	0.83242	0.840796	0.815627	0.807595	0.780072	0.780838	0.753776	0.757958	0.743794	0.764519	0.754759	0.797987	0.809
prk	Democratic People's Republic of Korea	Low-middle SDI	TRUE	Air pollution DALYs	1.45849e+06	1.45717e+06	1.45563e+06	1.45528e+06	1.44922e+06	1.4384e+06	1.42221e+06	1.41608e+06	1.41152e+06	1.40483e+06	1.39253e+06	1.37667e+06	1.36371e+06	1.35774e+06	1.36188e+06	1.36425e+06	1.36852e+06	1.37155e+06	1.38001e+06	1.3795e+06	1.379e+06	1.38077e+06	1.37993e+06	1.38101e+06	1.37991e+06	1.38107e+06	1.37024e+06	1.36167e+06	1.36257e+06	1.36613e+06
prk	Democratic People's Republic of Korea	Low-middle SDI	TRUE	Air pollution deaths	38395.9	39167.7	39995.3	40894.7	41765.9	42157.2	42356.3	42941.4	43510.8	44070.7	44351.6	44540.5	44755.8	45434.5	46521.8	47491.9	48537.1	49492.1	50454.8	51142.1	51751.1	52387.5	52868.8	53380.9	53731.6	54158.2	54158.3	54251.9	54672.5	55153.9
prk	Democratic People's Republic of Korea	Low-middle SDI	TRUE	All cause DALYs	9.25945e+06	9.24523e+06	9.22278e+06	9.21699e+06	9.16917e+06	1.33673e+07	1.35122e+07	1.34299e+07	1.33461e+07	1.32401e+07	1.17687e+07	1.16408e+07	1.15146e+07	8.53983e+06	8.54947e+06	8.55033e+06	8.56312e+06	8.59883e+06	8.56775e+06	8.57028e+06	8.57492e+06	8.57917e+06	8.58018e+06	8.57004e+06	8.5654e+06	8.57096e+06	8.60604e+06	8.60356e+06	8.62655e+06	8.64053e+06
prk	Democratic People's Republic of Korea	Low-middle SDI	TRUE	All cause deaths	168904	171243	173641	176615	179127	277735	253495	254789	256286	257714	258795	259807	260755	190053	194253	198056	202198	206723	209616	212850	215695	218435	220815	222639	224437	226386	229359	231783	234559	237057
cod	Democratic Republic of the Congo	Low SDI	FALSE	PM-equivalent emissions	4827.19	4678.74	4691.97	4782.53	4796.34	4851.69	4888.75	4934.52	4890.06	4939.78	4972.6	5019.82	4938.65	4813.34	4810.61	4791.42	4766.94	4682.59	4768.09	4728.78	4695.52	4730.87	4621.22	4697.53	4782.62	4782.49	4797.5	4906.5	4911.41	4916.28
cod	Democratic Republic of the Congo	Low SDI	FALSE	Fossil/industrial fraction	0.0644104	0.0366272	0.0235355	0.0166385	0.016209	0.0157037	0.0161462	0.0162519	0.0168397	0.0169358	0.0168332	0.0167374	0.0175476	0.0188592	0.0195574	0.0207109	0.0216324	0.0228049	0.0232966	0.0239743	0.0253561	0.0269522	0.0343542	0.03736	0.0403041	0.0364679	0.0353929	0.0360029	0.0371691	0.0383193
cod	Democratic Republic of the Congo	Low SDI	FALSE	Air pollution DALYs	3.89233e+06	3.93109e+06	3.96143e+06	4.00278e+06	4.06235e+06	4.0986e+06	4.14737e+06	4.15411e+06	4.18304e+06	4.2161e+06	4.28752e+06	4.32187e+06	4.3244e+06	4.36036e+06	4.31973e+06	4.29668e+06	4.29999e+06	4.27788e+06	4.25095e+06	4.20911e+06	4.13354e+06	4.03428e+06	3.95288e+06	3.84208e+06	3.70904e+06	3.54182e+06	3.36426e+06	3.21219e+06	3.15582e+06	3.07202e+06
cod	Democratic Republic of the Congo	Low SDI	FALSE	Air pollution deaths	63860.3	65055.1	66032	66990.2	68386.5	69672.7	71439.4	71627.7	72675.1	73651.9	75154.4	76238.2	76654.5	78108.8	78112.8	78170.7	78797.2	78970.1	79328.9	79214.3	78669.8	78060.1	77494.1	76222	74691.2	72694.8	70801.2	69446.2	69695.8	69502.8
cod	Democratic Republic of the Congo	Low SDI	FALSE	All cause DALYs	3.91912e+07	4.01706e+07	4.10287e+07	4.22341e+07	4.35668e+07	4.42799e+07	4.77693e+07	4.70802e+07	4.76551e+07	4.82775e+07	4.85905e+07	4.89566e+07	4.97938e+07	4.99198e+07	4.95733e+07	4.92321e+07	4.90939e+07	4.89561e+07	4.89194e+07	4.85707e+07	4.74572e+07	4.66604e+07	4.57193e+07	4.43439e+07	4.27862e+07	4.12702e+07	4.01792e+07	3.93092e+07	3.79936e+07	3.75024e+07
cod	Democratic Republic of the Congo	Low SDI	FALSE	All cause deaths	527502	542776	556658	575182	595156	608557	662666	651302	660249	669465	674596	681575	693686	697178	692609	687685	687473	688118	691178	689140	675128	666666	656373	639133	619709	600750	588096	579547	564842	564091
dnk	Denmark	High SDI	FALSE	PM-equivalent emissions	540.375	617.898	537.318	553.545	565.956	548.594	588.197	475.371	430.192	396.026	372.042	344.781	314.954	335.126	306.158	303.818	334.092	327.752	286.083	223.208	240.076	231.518	200.22	204.252	206.194	201.095	193.535	179.99	177.139	174.524
dnk	Denmark	High SDI	FALSE	Fossil/industrial fraction	0.970889	0.97163	0.967629	0.968369	0.970685	0.967552	0.967761	0.961436	0.960598	0.95625	0.953122	0.945846	0.937771	0.93332	0.923949	0.916193	0.92123	0.911513	0.902407	0.878879	0.876139	0.880647	0.867195	0.87127	0.876861	0.862326	0.851217	0.828698	0.82874	0.828933
dnk	Denmark	High SDI	FALSE	Air pollution DALYs	76892.7	73945	71831.4	70305.1	68088.4	66109.3	63478.8	60603.3	58072.5	57135	53814.4	52168.9	50762.5	48397.9	45720.1	43648.7	43193.5	43229.3	42317.7	42206.9	41344.2	39002.9	36034.3	32776.6	29804.7	28379.7	28673.3	29096.3	29396.8	28424.9
dnk	Denmark	High SDI	FALSE	Air pollution deaths	3768.72	3644.17	3568.1	3520.25	3416.16	3338.41	3194.85	3041.22	2904.43	2854.48	2708.19	2653.55	2596.48	2471.34	2325.35	2220.39	2196.24	2200.69	2154.85	2156.46	2109.69	1992.2	1848.01	1683.5	1526.08	1451.55	1464.54	1485.64	1511.75	1466.57
dnk	Denmark	High SDI	FALSE	All cause DALYs	1.82745e+06	1.82063e+06	1.82593e+06	1.83126e+06	1.84567e+06	1.8413e+06	1.81894e+06	1.79204e+06	1.76538e+06	1.77435e+06	1.74087e+06	1.74061e+06	1.7393e+06	1.72385e+06	1.70487e+06	1.68389e+06	1.68287e+06	1.68367e+06	1.67191e+06	1.66536e+06	1.65274e+06	1.63213e+06	1.62291e+06	1.61871e+06	1.61447e+06	1.61859e+06	1.63872e+06	1.65881e+06	1.67975e+06	1.70135e+06
dnk	Denmark	High SDI	FALSE	All cause deaths	59254.7	59187.8	59978.9	60722.8	61328.1	61418	60213.5	58832.5	57384.5	57732	56662.9	57378.3	57627.4	56812.6	55758.6	54783	54776.8	54716.8	54143.9	54021.3	53389.2	52368.6	51975	51736.5	51361.9	51544.5	52499.1	53452.7	54397.2	55373.8
dji	Djibouti	Low-middle SDI	FALSE	PM-equivalent emissions	25.1102	24.2876	22.6866	22.4437	23.2736	23.8813	23.2707	22.3817	22.4268	21.9893	21.0343	20.9485	20.7789	20.8893	20.9943	21.649	20.87	21.3042	19.5709	20.2677	20.2266	21.5139	21.5022	18.7394	19.1245	19.5224	19.9996	20.3407	20.5569	20.7878
dji	Djibouti	Low-middle SDI	FALSE	Fossil/industrial fraction	0.751403	0.745067	0.735104	0.7396	0.711502	0.702191	0.695999	0.694999	0.701533	0.691299	0.686363	0.67821	0.677166	0.67527	0.671127	0.676124	0.659093	0.663133	0.631959	0.643224	0.643469	0.656824	0.661121	0.619806	0.640041	0.646846	0.653828	0.655705	0.659579	0.663593
dji	Djibouti	Low-middle SDI	FALSE	Air pollution DALYs	30025.2	30096.6	30090.3	30949.5	31242.4	31774.6	31825.5	31961	32520.3	32837.6	32794.9	32454.8	31863.9	31199.9	31457.3	31087.2	31470.8	31937.1	32165.3	32314.1	32800.4	32840.3	32975.9	33095.9	32460.3	32329.2	31883	31367.6	31044.7	30807.8
dji	Djibouti	Low-middle SDI	FALSE	Air pollution deaths	442.616	446.988	451.384	466.847	472.299	485.002	490.171	495.283	507.986	515.411	517.86	516.151	511.668	504.12	514.195	515.521	526.377	541.079	552.72	562.22	578.913	590.307	603.192	616.151	616.678	628.169	631.586	637.407	648.165	658.401
dji	Djibouti	Low-middle SDI	FALSE	All cause DALYs	319997	327958	349965	342610	355406	350831	359488	375859	390971	402993	414029	426165	438113	445382	453634	454795	466532	462983	467624	473131	478582	479464	479576	479758	477979	475787	470130	465994	462278	466453
dji	Djibouti	Low-middle SDI	FALSE	All cause deaths	4138.22	4283.35	4639.58	4519.23	4747.28	4702.19	4848.85	5098.59	5348.23	5551.75	5743.02	5954.14	6164.79	6309.98	6483.57	6548.11	6784.88	6749.85	6861.24	6988.12	7106.38	7178.85	7235.79	7296.85	7338.25	7372.01	7353.54	7371.98	7402.92	7575.49
dma	Dominica	Middle SDI	FALSE	PM-equivalent emissions	0.791096	0.842459	0.858089	0.852983	0.903286	0.919953	0.911318	0.897107	0.913879	0.904269	0.933551	0.952594	1.20454	1.23784	1.28357	0.889159	1.17204	1.27652	1.26843	1.30992	1.39328	1.27058	1.66128	1.64624	1.5644	1.58742	1.57366	1.2226	1.23827	1.20745
dma	Dominica	Middle SDI	FALSE	Fossil/industrial fraction	0.767195	0.773725	0.770896	0.760626	0.773836	0.78065	0.770917	0.769649	0.764573	0.737161	0.774235	0.783701	0.803176	0.82082	0.816311	0.786969	0.824859	0.847752	0.859054	0.854529	0.860335	0.845735	0.875567	0.877143	0.858569	0.84653	0.852411	0.823379	0.826949	0.823792
dma	Dominica	Middle SDI	FALSE	Air pollution DALYs	1471.51	1427.89	1349.86	1295.66	1253.24	1210.36	1171.89	1126.38	1085.73	1069.03	1033.41	994.109	964.614	938.275	901.888	873.158	866.481	861.914	854.092	853.326	859.499	876.648	901.906	924.568	942.971	953.632	930.509	912.803	925.903	948.8
dma	Dominica	Middle SDI	FALSE	Air pollution deaths	60.9342	59.7226	56.3955	54.4399	53.0519	51.5206	50.0896	48.2223	46.5831	46.3208	44.9553	43.0784	41.683	40.3335	38.3716	37.0493	36.671	36.3596	35.7578	35.4316	35.4104	35.7547	36.4158	37.0604	37.5918	37.8115	36.6785	35.7622	36.1716	36.9699
dma	Dominica	Middle SDI	FALSE	All cause DALYs	24600	24743.2	24384.4	24310.4	24274.8	24266.1	24073.9	23778	24206.7	23920.2	23951.2	23742.3	23729.2	23865.5	23696.2	23413	23434.5	23697.5	23410.9	23524.2	23886.9	23930.5	24064.4	24294.9	24527.9	25496	24645.9	26196.9	24911.4	25064.7
dma	Dominica	Middle SDI	FALSE	All cause deaths	690.236	703.149	692.557	695.555	701.211	705.49	706.067	699.896	709.667	713.641	716.614	711.201	714.462	718.052	707.027	696.657	697.603	703.926	695.073	695.941	703.841	705.025	709.206	715.038	721.63	761.071	723.061	789.008	729.807	735.028
dom	Dominican Republic	Low-middle SDI	TRUE	PM-equivalent emissions	150.808	155.997	170.575	165.917	192.963	196.22	201.791	220.572	253.549	265.982	286.386	304.957	342.317	290.069	269.034	295.955	299.934	298.967	298.166	287.475	286.89	277.342	276.074	283.27	287.98	302.946	320.015	302.418	310.679	327.121
dom	Dominican Republic	Low-middle SDI	TRUE	Fossil/industrial fraction	0.745155	0.75767	0.777663	0.760016	0.789959	0.80155	0.801046	0.818279	0.835244	0.84617	0.838636	0.849941	0.863439	0.847307	0.824245	0.847195	0.853418	0.850433	0.850829	0.845897	0.85507	0.855137	0.850946	0.855151	0.853492	0.865124	0.868869	0.854906	0.859119	0.866526
dom	Dominican Republic	Low-middle SDI	TRUE	Air pollution DALYs	171057	163009	153516	148403	140760	136534	133468	132167	129630	126916	123865	121790	119059	120585	124261	125170	125788	124225	120356	119061	119370	123392	132081	142349	147479	153174	153086	148665	146408	145045
dom	Dominican Republic	Low-middle SDI	TRUE	Air pollution deaths	3527.13	3384.14	3231.8	3183.61	3075.7	3053.52	3102.78	3175.49	3206.62	3228.93	3192.92	3196.83	3202.24	3352.03	3555.52	3657.71	3712.63	3713.99	3689.76	3714.38	3764.03	3880.06	4159.72	4498.7	4732.62	4953.19	4961.66	4829.67	4779.72	4766.22
dom	Dominican Republic	Low-middle SDI	TRUE	All cause DALYs	2.73796e+06	2.73509e+06	2.70935e+06	2.72254e+06	2.70717e+06	2.71345e+06	2.72952e+06	2.74363e+06	2.77285e+06	2.75349e+06	2.75263e+06	2.75604e+06	2.74437e+06	2.79241e+06	2.91558e+06	2.91099e+06	2.91852e+06	2.92082e+06	2.86985e+06	2.87987e+06	2.89929e+06	2.96716e+06	3.09193e+06	3.21176e+06	3.25264e+06	3.31298e+06	3.34452e+06	3.32788e+06	3.31279e+06	3.30936e+06
dom	Dominican Republic	Low-middle SDI	TRUE	All cause deaths	38841.5	38826.2	38655.3	39315.3	39456.6	40216.3	41718.3	42968	44335.8	44949.8	45464.1	46248.2	46947.4	49381.7	53360.9	54589.8	55266.4	55693.3	55672.1	56758	57775.4	59186.6	62418.7	65926.7	68074.2	70318.6	71150.2	70730.3	70454.5	70544.7
ecu	Ecuador	Middle SDI	FALSE	PM-equivalent emissions	282.01	282.469	303.326	315.218	320.98	347.857	402.64	435.061	379.439	298.74	330.946	344.424	380.527	377.96	409.142	397.81	407.107	413.211	413.085	436.062	475.08	475.92	476.98	489.937	511.333	481.186	452.589	434.534	460.614	452.622
ecu	Ecuador	Middle SDI	FALSE	Fossil/industrial fraction	0.835999	0.830213	0.862199	0.866839	0.86922	0.869814	0.883528	0.904601	0.880025	0.853078	0.865685	0.874139	0.888643	0.888766	0.89972	0.91333	0.91172	0.904401	0.909734	0.919054	0.925189	0.923592	0.922596	0.924127	0.922938	0.919211	0.914778	0.910814	0.916387	0.915405
ecu	Ecuador	Middle SDI	FALSE	Air pollution DALYs	152507	151482	144353	137736	134370	133135	135721	131007	131568	130674	129392	125618	131860	133411	133512	135717	137278	138999	140416	139778	139940	135721	136981	136145	134338	133197	131851	130941	132734	136515
ecu	Ecuador	Middle SDI	FALSE	Air pollution deaths	3711.96	3785.29	3622.01	3460.55	3365.84	3285	3358.15	3207.06	3276.66	3306.42	3300.04	3219.7	3519.28	3657.49	3730.24	3894.24	4003.82	4087.05	4177.36	4211.76	4295.62	4278.53	4469.78	4574.44	4586.75	4531.74	4530.91	4514.12	4639.44	4761.92
ecu	Ecuador	Middle SDI	FALSE	All cause DALYs	3.2453e+06	3.33904e+06	3.32639e+06	3.33951e+06	3.31187e+06	3.34832e+06	3.43628e+06	3.43256e+06	3.52296e+06	3.56347e+06	3.58642e+06	3.57507e+06	3.72642e+06	3.8009e+06	3.85387e+06	3.94227e+06	4.0045e+06	4.05475e+06	4.10997e+06	4.11837e+06	4.14889e+06	4.08311e+06	4.11688e+06	4.11092e+06	4.10097e+06	4.10719e+06	4.20812e+06	4.26339e+06	4.31291e+06	4.3751e+06
ecu	Ecuador	Middle SDI	FALSE	All cause deaths	51538	54289.8	54086.7	54240	53773.9	53985.5	56104.2	55411.2	57863.3	59315.4	60029.5	59833.5	65176.6	68249.1	70431.1	73738.4	75892.5	77343	79106.1	79830.8	81300	80794.8	83462.3	85070.5	85654.1	85349.4	88371.8	90051.6	91642.1	92531.3
egy	Egypt	Low-middle SDI	TRUE	PM-equivalent emissions	1217.38	1213.81	1190.64	1199.49	1206.27	1296.48	1414.2	1541.53	1518.69	1535.02	1494.65	1400.58	1391.58	1480.04	1528.12	1488.66	1475.01	1484.81	1516.68	1548.3	1560.62	1517.58	1606.31	1680.91	1779.34	1723.59	1652.48	1621.55	1565.53	1549.65
egy	Egypt	Low-middle SDI	TRUE	Fossil/industrial fraction	0.897753	0.896254	0.89433	0.893679	0.890995	0.897819	0.902514	0.907418	0.902823	0.900514	0.895696	0.88703	0.885822	0.892928	0.897065	0.89395	0.892802	0.892228	0.892439	0.889483	0.885073	0.876379	0.877707	0.877355	0.878846	0.874444	0.868641	0.865817	0.861534	0.860837
egy	Egypt	Low-middle SDI	TRUE	Air pollution DALYs	3.19658e+06	3.11613e+06	3.02255e+06	2.97795e+06	2.90167e+06	2.80085e+06	2.68204e+06	2.63327e+06	2.57296e+06	2.54506e+06	2.46848e+06	2.52965e+06	2.55669e+06	2.60571e+06	2.59742e+06	2.59355e+06	2.63833e+06	2.66257e+06	2.71726e+06	2.79674e+06	2.81131e+06	2.79681e+06	2.81084e+06	2.75276e+06	2.75042e+06	2.88316e+06	2.82891e+06	2.79315e+06	2.81588e+06	2.85214e+06
egy	Egypt	Low-middle SDI	TRUE	Air pollution deaths	67592.6	67152.4	66195.4	67202.2	67537.8	66235.2	65385.2	65790.4	65582.5	65463.8	63521.1	66784.6	69258.6	72180.4	72442.3	72305.2	73820.9	74724.1	77300.3	80286.5	81905.5	82312.1	84552.2	83173.9	84663.7	89711.8	89601.4	88462.2	89879.4	91663
egy	Egypt	Low-middle SDI	TRUE	All cause DALYs	2.8679e+07	2.77269e+07	2.68349e+07	2.63072e+07	2.5733e+07	2.49864e+07	2.41465e+07	2.3807e+07	2.34574e+07	2.33097e+07	2.28791e+07	2.31762e+07	2.33587e+07	2.36291e+07	2.36531e+07	2.37082e+07	2.40034e+07	2.40656e+07	2.43228e+07	2.47449e+07	2.48598e+07	2.50929e+07	2.52594e+07	2.52654e+07	2.52684e+07	2.62241e+07	2.60155e+07	2.61142e+07	2.62415e+07	2.63715e+07
egy	Egypt	Low-middle SDI	TRUE	All cause deaths	465252	453784	441501	440805	439151	428782	421308	422888	422856	423151	412829	428716	442004	457503	458851	456961	462330	463218	473558	486649	493526	499697	511865	508944	516889	545385	548715	548144	554687	561556
slv	El Salvador	Low-middle SDI	FALSE	PM-equivalent emissions	72.0524	82.3217	86.6071	87.2647	91.2008	98.0721	96.1891	112.461	113.979	108.401	108.505	118.095	121.691	122.856	122.321	129.892	138.462	135.349	125.064	122.489	117.206	118.89	118.477	107.78	107.478	110.056	112.553	95.8784	97.3194	95.8384
slv	El Salvador	Low-middle SDI	FALSE	Fossil/industrial fraction	0.587082	0.625565	0.65081	0.665399	0.677145	0.7005	0.692172	0.733133	0.73461	0.72843	0.736313	0.748487	0.748043	0.732072	0.722403	0.73292	0.735089	0.800783	0.75995	0.731696	0.699459	0.72109	0.739079	0.75466	0.776903	0.778445	0.775143	0.710392	0.715715	0.712248
slv	El Salvador	Low-middle SDI	FALSE	Air pollution DALYs	141065	137907	137151	135026	132006	125315	120448	116857	115669	105444	99590.5	93512.8	86042.6	83632.5	82474.8	80532.7	79448.7	77202.1	74831.1	77660.5	73035.9	74328.3	70445.9	72288	75258.8	73889.3	70514.7	67315.5	65895.5	65658.4
slv	El Salvador	Low-middle SDI	FALSE	Air pollution deaths	3439.78	3404.1	3468.46	3502.62	3509.58	3367.05	3282.09	3263.1	3347.08	3087.65	2986.65	2893.05	2719.71	2739.52	2768.76	2750.22	2754.42	2717.63	2653.78	2786.69	2637.66	2711.05	2583.31	2717.23	2890.93	2848.81	2714.02	2609.36	2573.3	2574.03
slv	El Salvador	Low-middle SDI	FALSE	All cause DALYs	2.12927e+06	2.12164e+06	2.02145e+06	2.0054e+06	1.99696e+06	1.94674e+06	1.89737e+06	1.88654e+06	1.92504e+06	1.80443e+06	1.77138e+06	1.78577e+06	1.66984e+06	1.69493e+06	1.70613e+06	1.71571e+06	1.71235e+06	1.69359e+06	1.67166e+06	1.73615e+06	1.66832e+06	1.69234e+06	1.82031e+06	1.84327e+06	1.91875e+06	1.95012e+06	1.75296e+06	1.75149e+06	1.75502e+06	1.75656e+06
slv	El Salvador	Low-middle SDI	FALSE	All cause deaths	32783.5	32922.5	32130.8	32598.8	33096.7	32467.2	31954.7	32574.8	34430.6	32167	32058.2	32720.1	30812	32150.6	33250.7	33912.8	34268	34178.4	33783	35841.4	34177	35229.2	37007.1	38540.2	41395.1	42259.1	38925.7	39260.3	39652.9	40198.6
gnq	Equatorial Guinea	Middle SDI	FALSE	PM-equivalent emissions	6.5825	7.21954	7.24571	6.56844	7.14131	8.10051	8.30951	10.473	10.0102	14.0663	14.0033	11.5139	31.8059	72.4682	68.8373	41.4835	42.3933	42.5815	41.6198	38.0375	36.7734	33.0229	34.2405	34.0273	34.5236	35.2889	33.3953	33.1466	33.8359	34.4619
gnq	Equatorial Guinea	Middle SDI	FALSE	Fossil/industrial fraction	0.210053	0.284659	0.300753	0.216026	0.19377	0.257604	0.255708	0.427297	0.394364	0.56275	0.563104	0.456988	0.803874	0.913919	0.906313	0.838997	0.839251	0.836903	0.825756	0.805326	0.795909	0.768415	0.776345	0.775153	0.780175	0.782222	0.765893	0.758731	0.763816	0.768263
gnq	Equatorial Guinea	Middle SDI	FALSE	Air pollution DALYs	58625.2	59094.1	59097.5	59098.7	58852.8	58512.5	57061.5	52284.8	48819.3	46122.3	43525.4	39406	36254.7	34239.5	32877.2	32085.1	30572.5	29091	27418.4	25910.6	25007.8	25498.2	25430.9	24397.2	23744.8	23482.1	22359.4	21110.6	20936.7	20929.8
gnq	Equatorial Guinea	Middle SDI	FALSE	Air pollution deaths	957.783	961.013	956.273	954.546	949.617	945.35	927.949	857.016	807.3	767.786	728.881	669.82	621.734	594.295	575.8	563.581	546.246	526.041	505.158	488.362	480.778	494.836	498.553	489.428	484.687	490.141	480.809	469.145	477.681	485.627
gnq	Equatorial Guinea	Middle SDI	FALSE	All cause DALYs	502301	518391	531491	545315	559423	572315	578449	556434	546206	537058	525705	503583	489554	487454	485519	494050	481225	479907	475595	465029	473390	497799	504433	488078	485756	498527	499069	489474	493145	502484
gnq	Equatorial Guinea	Middle SDI	FALSE	All cause deaths	7219.32	7387.44	7511.38	7661.89	7823.8	7969.26	8033.08	7666.27	7495.82	7348.24	7180.59	6885.22	6694.64	6701.55	6702.9	6832.87	6689.16	6700.31	6697.8	6609.13	6778.45	7163.62	7274.22	7042	7015.69	7294.94	7407.5	7322.48	7425.82	7618.31
eri	Eritrea	Low SDI	FALSE	PM-equivalent emissions	26.6994	26.9324	61.543	55.9891	65.2328	57.5675	61.6126	53.266	36.9234	35.2083	36.6257	38.5037	38.6661	39.9363	37.0323	37.2324	36.0828	36.5918	36.5292	36.7286	36.8449	38.0978	38.6192	39.1861	39.2613	39.7075	40.3131	40.9005	41.3905	41.874
eri	Eritrea	Low SDI	FALSE	Fossil/industrial fraction	0.323515	0.323863	0.679253	0.639359	0.682425	0.632212	0.648907	0.583358	0.554173	0.550351	0.559573	0.565104	0.553402	0.553849	0.615757	0.616736	0.594631	0.593119	0.584858	0.579365	0.576619	0.596618	0.60834	0.616598	0.617254	0.616429	0.615027	0.621144	0.625921	0.630508
eri	Eritrea	Low SDI	FALSE	Air pollution DALYs	336139	317193	309236	306859	305250	304892	300080	295847	289816	287388	286364	288228	296501	297618	304272	304249	303152	302666	301385	295201	293709	288907	283735	280021	274425	267524	262909	256671	252847	251707
eri	Eritrea	Low SDI	FALSE	Air pollution deaths	5032	4800.44	4733.61	4747.44	4793.86	4876.01	4833.44	4802.57	4735.62	4731.28	4748.79	4801.57	4981.88	5051	5183.14	5233.09	5276.69	5329.01	5378.95	5361.15	5393.92	5385.41	5378.59	5380.38	5352.89	5319.28	5311.93	5289.52	5299.8	5335.52
eri	Eritrea	Low SDI	FALSE	All cause DALYs	3.69944e+06	3.55188e+06	2.82216e+06	2.82796e+06	2.84103e+06	2.87538e+06	2.87904e+06	2.86731e+06	2.91354e+06	4.14287e+06	2.97597e+06	2.8881e+06	2.93463e+06	2.97211e+06	2.9812e+06	2.99596e+06	2.97864e+06	2.97149e+06	2.98559e+06	2.96252e+06	2.9502e+06	2.92787e+06	2.89153e+06	2.85308e+06	2.80921e+06	2.77023e+06	2.7426e+06	2.71622e+06	2.70009e+06	2.6977e+06
eri	Eritrea	Low SDI	FALSE	All cause deaths	51367.9	49782.6	38971.6	39297.6	39851.2	40839	41108.4	41132.2	42017.3	60247.7	43169.1	42035.6	42836.8	43539.3	43852.9	44228.5	44116.1	44156.5	44546	44416.7	44477.9	44407.5	44127.1	43823.8	43445.9	43171.1	43092.9	43039	43130.3	43395.2
est	Estonia	High SDI	FALSE	PM-equivalent emissions	363.059	334.357	252.169	213.812	211.746	172.91	186.008	179.891	166.207	155.796	154.352	149.825	148.11	162.465	153.514	135.839	136.983	164.389	145.407	127.127	161.139	145.225	129.784	140.13	128.673	115.958	117.167	121.743	118.712	118.524
est	Estonia	High SDI	FALSE	Fossil/industrial fraction	0.959529	0.956081	0.936363	0.93014	0.917139	0.904033	0.904319	0.892668	0.902894	0.897765	0.896238	0.887734	0.890815	0.895778	0.886324	0.8814	0.886272	0.891602	0.874578	0.834484	0.848697	0.844151	0.817786	0.830819	0.820422	0.796697	0.763134	0.763988	0.76066	0.762896
est	Estonia	High SDI	FALSE	Air pollution DALYs	26828.6	26733.6	25507.6	26506	27470.9	24831.5	20746.3	19566	19497.3	17685.7	16917.6	16911.9	15898.5	14965	14150	13315	12759	12405.2	11098.5	10234.6	9174.2	8723.56	7880.22	6727.37	5982.04	5107.85	4479.62	4079.39	4140.86	4253.04
est	Estonia	High SDI	FALSE	Air pollution deaths	1169.82	1165.36	1106.4	1138.91	1161.89	1050.37	892.71	845.897	845.385	771.318	741.608	741.954	700.988	667.401	632.534	599.686	575.105	558.972	504.023	467.821	420.782	401.041	361.951	311.547	276.395	236.379	209.795	193.575	199.444	206.774
est	Estonia	High SDI	FALSE	All cause DALYs	654301	668085	662671	695753	744613	692294	620686	612431	628157	604139	599328	612223	593654	576092	564641	552171	546522	546858	516826	499380	473254	475538	472134	457040	459653	449615	455444	456199	456547	455756
est	Estonia	High SDI	FALSE	All cause deaths	19112.4	19716.4	19475.4	20724.7	22143.2	20615.8	18356.3	18230.7	19002.6	18188.4	18127	18647.4	18108.7	17740	17442.3	17160.7	17048.9	17211.7	16334.6	15925.6	15062.5	15334.9	15338.1	15009.3	15267.6	14996	15517.5	15675.2	15829.6	15888.7
swz	Eswatini	Low-middle SDI	FALSE	PM-equivalent emissions	32.6841	32.5289	32.2812	30.009	38.0592	38.2585	38.2886	46.9674	48.6947	46.6574	38.5329	38.2411	37.9938	35.0882	34.4656	32.4888	32.8599	34.3137	34.7493	33.8713	33.3147	31.5818	32.0271	31.2112	31.0509	31.381	31.7709	32.2481	32.1416	31.7877
swz	Eswatini	Low-middle SDI	FALSE	Fossil/industrial fraction	0.507572	0.512957	0.521124	0.43841	0.512404	0.508785	0.508661	0.607691	0.624905	0.608807	0.534276	0.536874	0.525838	0.534558	0.549019	0.509677	0.511318	0.532249	0.528367	0.515176	0.517749	0.489092	0.499139	0.488405	0.492745	0.497973	0.502468	0.506264	0.504886	0.499618
swz	Eswatini	Low-middle SDI	FALSE	Air pollution DALYs	47159.9	46322.6	45383.6	44406.9	43936.6	44080	44452.2	44544.8	45275.7	46350	47873.5	49153.3	50014.4	50776.7	51262.9	51509.6	50744.3	50193.7	49556.3	48587	46456.5	43846.3	42074.6	40093.2	38108.2	36494.1	35063.4	34041.9	33292.3	32783.5
swz	Eswatini	Low-middle SDI	FALSE	Air pollution deaths	856.685	850.377	838.199	824.895	825.896	841.682	861.138	868.124	894.685	926.209	975.628	1014.67	1046.86	1068.06	1085.67	1095.4	1082.19	1073.11	1064.49	1050.58	1015.89	975.416	951.881	925.607	893.161	868.8	849.296	837.334	832.269	831.798
swz	Eswatini	Low-middle SDI	FALSE	All cause DALYs	416559	420334	430477	443330	472120	514974	576601	633400	709847	790159	881440	970644	1.03278e+06	1.09352e+06	1.13791e+06	1.13444e+06	1.09848e+06	1.07394e+06	1.05143e+06	1.01947e+06	949133	877072	840577	799309	756945	718667	686311	662265	644129	636827
swz	Eswatini	Low-middle SDI	FALSE	All cause deaths	6309.35	6384.09	6525.76	6723.5	7204.56	7954.44	9025.12	10022	11428.4	12921.8	14667.2	16325.9	17601.9	18777.1	19651	19701.8	19074.3	18564.1	18139.4	17630.4	16532.7	15380.8	14797.7	14135.8	13403.4	12744.1	12218.5	11839.1	11602.2	11566.5
eth	Ethiopia	Low SDI	TRUE	PM-equivalent emissions	1075.64	1102.17	1091.81	1114.17	1155.52	1185.87	1197.05	1222.23	1241.15	1250.48	1271.07	1293.13	1299.06	1290.14	1297.54	1300.33	1324.1	1348.5	1382.4	1407.6	1414.27	1433.83	1461.84	1492.59	1518.94	1536.66	1568.89	1589.84	1603.44	1614.93
eth	Ethiopia	Low SDI	TRUE	Fossil/industrial fraction	0.211354	0.215848	0.17861	0.173636	0.171605	0.172048	0.181059	0.182023	0.191194	0.191217	0.187751	0.201669	0.21225	0.209468	0.221314	0.226365	0.235547	0.249158	0.260543	0.267081	0.269606	0.272781	0.280271	0.289004	0.296234	0.299486	0.311126	0.319868	0.325788	0.330729
eth	Ethiopia	Low SDI	TRUE	Air pollution DALYs	8.3524e+06	8.40822e+06	8.49833e+06	8.46407e+06	8.44387e+06	8.38042e+06	8.24183e+06	8.09812e+06	7.96125e+06	7.83071e+06	7.61165e+06	7.36994e+06	7.16915e+06	6.92796e+06	6.65285e+06	6.55158e+06	6.3288e+06	6.14519e+06	5.92712e+06	5.64455e+06	5.35594e+06	5.16647e+06	4.93675e+06	4.72448e+06	4.66021e+06	4.47887e+06	4.3281e+06	4.24124e+06	4.12292e+06	3.98817e+06
eth	Ethiopia	Low SDI	TRUE	Air pollution deaths	125109	126014	127618	127509	127389	126773	124976	123367	121952	120423	117331	113969	111360	108410	105136	103759	100915	98417.2	95572.2	92116.7	88650.1	86734.2	84393.3	82202	81795.9	80081.7	78849.9	78446.8	77863.1	77020.1
eth	Ethiopia	Low SDI	TRUE	All cause DALYs	6.38968e+07	6.23248e+07	6.24861e+07	6.30714e+07	6.38096e+07	6.42424e+07	6.40473e+07	6.37311e+07	6.34403e+07	6.53751e+07	6.53706e+07	6.06751e+07	5.92777e+07	5.81527e+07	5.66463e+07	5.49024e+07	5.32109e+07	5.11727e+07	4.92452e+07	4.76847e+07	4.59686e+07	4.44174e+07	4.31524e+07	4.21397e+07	4.12424e+07	4.0464e+07	3.98512e+07	3.90709e+07	3.85129e+07	3.80543e+07
eth	Ethiopia	Low SDI	TRUE	All cause deaths	906716	883369	886726	896481	909098	917882	916211	913498	910839	939544	938910	870634	850361	833900	811957	785405	759257	727161	697395	673979	649262	628597	612709	600593	590075	581390	575603	567427	563155	559997
fji	Fiji	Middle SDI	FALSE	PM-equivalent emissions	23.2768	20.2735	21.5765	22.6888	21.7858	21.9864	22.4908	21.456	20.7093	22.9885	24.7914	27.4349	26.8759	31.4555	32.4433	34.9065	33.9962	30.6172	27.7176	20.6234	22.921	26.9811	27.3472	26.3941	26.9243	28.9088	28.6957	29.5191	30.1627	31.3612
fji	Fiji	Middle SDI	FALSE	Fossil/industrial fraction	0.832714	0.807073	0.820304	0.828597	0.820991	0.825764	0.816285	0.806971	0.802953	0.813709	0.834602	0.852117	0.846393	0.870887	0.873876	0.886868	0.882728	0.868309	0.854527	0.787464	0.821229	0.855387	0.861181	0.855461	0.850842	0.863009	0.868728	0.873807	0.878129	0.884299
fji	Fiji	Middle SDI	FALSE	Air pollution DALYs	21539.9	21279.9	20865.7	20941.2	20957.7	21120.6	21551.4	21797.1	21462.5	22715	23360.4	22724.5	22259.2	22588.6	22087.6	22639.3	23058.2	23412.2	23695.7	23097.6	22960	22740.9	22466.2	22108.7	21818.7	21613.8	21430.5	21203.6	20954.2	20618.4
fji	Fiji	Middle SDI	FALSE	Air pollution deaths	583.204	579.938	574.741	577.95	581.628	589.922	604.339	613.452	601.302	641.328	663.593	644.732	632.965	645.687	625.269	640.792	655.357	670.834	682.817	667.091	668.517	667.68	663.096	656.009	651.73	649.179	647.578	645.792	641.506	633.517
fji	Fiji	Middle SDI	FALSE	All cause DALYs	245731	248006	248327	254676	256993	260349	265952	271213	268374	280905	287704	285531	284769	290931	289545	294406	299721	304403	308618	306302	308047	310920	315123	316258	318295	320897	326280	325360	327334	328869
fji	Fiji	Middle SDI	FALSE	All cause deaths	4583.94	4670.98	4731.41	4877.42	4961.67	5068.2	5208.92	5320.8	5224.55	5560.14	5751.24	5667.97	5648.63	5822.39	5729.71	5874.06	6045.64	6235.27	6394.93	6354.77	6467.15	6595.36	6728.89	6809.35	6920.34	7032.77	7181.52	7235.75	7331.89	7419.07
fin	Finland	High SDI	FALSE	PM-equivalent emissions	551.82	501.65	459.091	424.09	396.017	352.518	367.313	360.156	369.532	374.278	368.418	378.173	382.825	402.468	363.092	327.933	355.438	332.4	298.06	263.623	277.46	254.657	232.044	224.889	212.591	218.757	216.65	213.268	207.202	193.936
fin	Finland	High SDI	FALSE	Fossil/industrial fraction	0.927083	0.926771	0.921165	0.909214	0.899654	0.886004	0.889529	0.88044	0.881828	0.892579	0.882811	0.882606	0.876991	0.880089	0.862523	0.857213	0.85611	0.85155	0.826115	0.813026	0.787485	0.788941	0.758632	0.757046	0.7474	0.770556	0.756936	0.75101	0.74736	0.733773
fin	Finland	High SDI	FALSE	Air pollution DALYs	30925.5	29474.4	28279.8	26968.7	25069.4	24393	23366	22494.5	21532.8	20551.1	19680.5	18725.9	18078.4	17475.4	16878.6	16475.7	16043.4	16033	15881.9	15923.5	15814.5	14965	13522.1	11676.9	9874.51	8442.61	7453.93	6945.52	7452.23	8492.17
fin	Finland	High SDI	FALSE	Air pollution deaths	1389.28	1334.57	1300.75	1258.17	1168.88	1145.76	1105.75	1068.51	1023.4	978.415	940.356	897.445	869.477	835.131	794.101	773.279	753.613	753.216	745.348	751.463	752.044	714.641	651.233	566.006	480.157	411.061	361.71	336.638	365.686	416.627
fin	Finland	High SDI	FALSE	All cause DALYs	1.66961e+06	1.6601e+06	1.65341e+06	1.6399e+06	1.61329e+06	1.61919e+06	1.61847e+06	1.6238e+06	1.62391e+06	1.62321e+06	1.62274e+06	1.61353e+06	1.61336e+06	1.61481e+06	1.62028e+06	1.61988e+06	1.6166e+06	1.62639e+06	1.62588e+06	1.6289e+06	1.63143e+06	1.62635e+06	1.62569e+06	1.62252e+06	1.61846e+06	1.61419e+06	1.62771e+06	1.64355e+06	1.65584e+06	1.67103e+06
fin	Finland	High SDI	FALSE	All cause deaths	49350.8	49208.1	49657.7	49705.5	48391	48895.1	49101.6	49387.1	49290.7	49178.4	49236.8	48931.8	49125	48941.9	48508.7	48407.1	48399.2	48948.4	49184.1	49654.6	50308	50562	51080.9	51552.7	51884.6	52239	53133.1	54141.5	55098.4	56113.3
fra	France	High SDI	TRUE	PM-equivalent emissions	3490.42	3643.74	3462.13	3247.66	3083.04	3023.07	3029.3	2846.22	2932.78	2782.25	2642.33	2514.99	2420.71	2396.7	2400.69	2294.87	2203.1	2157.39	1976.86	1855.85	1843.65	1758.27	1712.56	1662.05	1520.98	1484.94	1432.12	1420.45	1376.09	1326.14
fra	France	High SDI	TRUE	Fossil/industrial fraction	0.944449	0.939664	0.937782	0.934439	0.937377	0.936296	0.933	0.935169	0.937578	0.937592	0.936516	0.933066	0.934086	0.929831	0.928624	0.925162	0.929	0.926072	0.918849	0.91137	0.900242	0.913133	0.901059	0.89229	0.90017	0.894618	0.885701	0.889434	0.888043	0.886032
fra	France	High SDI	TRUE	Air pollution DALYs	479061	465654	451813	444703	434451	431061	426911	418160	419072	412282	402484	395743	393252	386367	367997	363249	359223	359049	362497	367328	366032	358523	345842	327471	306480	295999	273233	265206	267433	270643
fra	France	High SDI	TRUE	Air pollution deaths	24269.3	23530.5	22810.4	22532	22024.2	21977.1	21836.6	21327.2	21291	20849.7	20214.4	19766.2	19761.5	19405.6	18334.8	18039.8	17798.4	17818.8	18052.2	18328.1	18283.3	17960.2	17451.6	16516.1	15453.3	15037.5	14005.2	13727	14051.3	14333.7
fra	France	High SDI	TRUE	All cause DALYs	1.73248e+07	1.73233e+07	1.72706e+07	1.72743e+07	1.71919e+07	1.71708e+07	1.71417e+07	1.70229e+07	1.7175e+07	1.72243e+07	1.71959e+07	1.72554e+07	1.73112e+07	1.73574e+07	1.70827e+07	1.711e+07	1.70978e+07	1.71038e+07	1.72022e+07	1.73001e+07	1.73221e+07	1.73203e+07	1.73665e+07	1.73649e+07	1.73243e+07	1.7576e+07	1.75042e+07	1.76812e+07	1.78257e+07	1.80666e+07
fra	France	High SDI	TRUE	All cause deaths	514085	513616	513216	516840	514665	518543	521334	517562	523462	524572	520429	520941	524831	527653	510214	511308	510634	513031	521014	527332	529896	533312	541536	543361	542312	559599	560750	575145	587746	603278
gab	Gabon	Middle SDI	FALSE	PM-equivalent emissions	68.0781	70.4183	96.4706	98.0686	87.6402	88.7536	95.1999	97.8038	101.784	102.481	105.8	104.039	110.495	120.43	128.212	139.706	138.095	147.01	155.963	162.375	176.884	150.545	137.98	177.391	167.623	169.657	168.281	163.965	165.15	166.084
gab	Gabon	Middle SDI	FALSE	Fossil/industrial fraction	0.219608	0.234856	0.429652	0.431904	0.365404	0.373552	0.34128	0.3436	0.371882	0.370686	0.393646	0.383268	0.352936	0.339459	0.324844	0.318766	0.297038	0.28838	0.262207	0.238406	0.249163	0.295236	0.322208	0.25808	0.253507	0.25487	0.260045	0.252972	0.262313	0.270252
gab	Gabon	Middle SDI	FALSE	Air pollution DALYs	51908.2	50296.1	49086.6	47836.4	47114.7	46588.2	45824.8	44872	44096.7	43345.9	42971.8	42152.5	40823.8	40133.2	39346.7	38651.6	38323.1	37738.4	37272.9	36417.1	35371.1	34896.6	33992.7	33265.7	33018.3	32894.6	31524.2	30238.3	30326.4	30730.7
gab	Gabon	Middle SDI	FALSE	Air pollution deaths	1163.77	1133.64	1110.98	1088.88	1081.77	1081.18	1073.94	1053.67	1040.12	1027.9	1026.09	1016.24	988.7	980.83	968.32	949.881	948.613	939.004	938.642	923.848	904.68	907.233	899.588	894.064	897.621	906.645	883.359	862.178	876.879	895.481
gab	Gabon	Middle SDI	FALSE	All cause DALYs	618163	623748	626985	638481	649749	659307	676239	679756	691041	707082	722704	732665	735060	741482	739475	721237	714317	711665	713819	705439	696014	689619	669802	651351	640716	636476	633457	628163	624251	623110
gab	Gabon	Middle SDI	FALSE	All cause deaths	10494.5	10592.3	10654.8	10891.9	11148.8	11390.6	11773.2	11837.8	12081.6	12414.6	12745.1	12987.7	13021.5	13204.2	13185.7	12782.4	12657.7	12637.4	12773.1	12643.4	12471.7	12452.8	12170	11879	11719.5	11710.1	11745.1	11739	11736	11766.9
gmb	Gambia	Low SDI	FALSE	PM-equivalent emissions	17.3691	17.4915	17.3378	17.1669	18.5368	19.3404	19.5028	19.3377	19.7042	20.356	20.5593	21.3417	21.5615	22.1235	22.8267	23.4667	24.1268	25.0661	25.7437	26.0992	26.8517	27.0221	27.119	27.1744	27.5901	28.1783	28.7449	29.3956	29.6989	29.9646
gmb	Gambia	Low SDI	FALSE	Fossil/industrial fraction	0.207849	0.217229	0.216967	0.223988	0.211351	0.207265	0.20552	0.209635	0.227236	0.229391	0.244823	0.246752	0.250866	0.257169	0.260208	0.261564	0.267263	0.288132	0.286438	0.292526	0.311303	0.300804	0.30167	0.299344	0.312516	0.317851	0.319646	0.319479	0.326866	0.333243
gmb	Gambia	Low SDI	FALSE	Air pollution DALYs	91517.1	93240.6	95234.4	93854.3	92874.5	96963	92465.5	92477.3	93341.2	95036.1	91023.3	89363.1	89349.3	90541.5	97238.1	97631.5	95510.6	94787.8	91800.3	90626.6	88636	82995.6	82761.8	82687	85121.3	82134.1	82977.9	84453.7	82612.9	81794
gmb	Gambia	Low SDI	FALSE	Air pollution deaths	1428.5	1462.49	1505.96	1493.99	1496.12	1585.35	1527.37	1545.97	1589.76	1654.69	1605.2	1595.12	1628	1673.69	1813.88	1853.19	1843.75	1855.52	1822.49	1838.45	1828.54	1742.79	1765.04	1797.51	1884.93	1859.38	1913.13	1983.95	1976.82	1986.81
gmb	Gambia	Low SDI	FALSE	All cause DALYs	721674	738848	761011	770137	786379	798986	811629	841980	834629	846739	852076	856890	862741	866307	866748	867664	864609	866401	861047	855995	848491	839998	834920	832912	830181	822062	815887	808935	802402	797263
gmb	Gambia	Low SDI	FALSE	All cause deaths	9728.71	9986.7	10340	10482.1	10764.9	11010.6	11266.3	11767.5	11778.5	12059.3	12248.1	12441.9	12667.1	12860.4	13009	13145.3	13218	13363.6	13389.7	13417.8	13394.8	13344.7	13347.7	13416.8	13491.1	13484.6	13484	13475.1	13475.5	13505.1
geo	Georgia	High-middle SDI	FALSE	PM-equivalent emissions	249.458	208.591	162.9	134.688	103.104	85.2638	100.117	87.316	80.7932	75.6059	73.6323	63.5854	62.7471	62.6059	62.0111	55.2115	53.8528	57.8931	53.8653	57.9226	53.4136	52.3692	54.3697	68.7016	71.5513	69.6473	71.0237	68.851	71.922	73.2737
geo	Georgia	High-middle SDI	FALSE	Fossil/industrial fraction	0.815532	0.79035	0.731152	0.665028	0.577576	0.56928	0.535934	0.543096	0.544781	0.523656	0.524322	0.449437	0.443963	0.447	0.44822	0.550379	0.532435	0.553172	0.532562	0.569456	0.551325	0.579549	0.603435	0.592385	0.617315	0.64136	0.653793	0.655	0.673161	0.682997
geo	Georgia	High-middle SDI	FALSE	Air pollution DALYs	242881	244618	245808	235781	235411	216084	203994	204435	206705	207363	206938	201244	200096	192747	185599	176253	168915	162124	158418	156011	149736	142021	131543	122646	116574	113300	114505	112360	110395	108453
geo	Georgia	High-middle SDI	FALSE	Air pollution deaths	8907.36	9037.46	9136.18	8835.84	8857.74	8052.12	7598.39	7765.35	8014.09	8196.2	8295.94	8143.83	8274.56	8179.92	7980.27	7585.48	7210.03	6749.36	6564.29	6558.53	6416.03	6153.32	5699.43	5326.1	5103.81	5001	5068.53	4978.46	4878.4	4787.22
geo	Georgia	High-middle SDI	FALSE	All cause DALYs	2.17767e+06	2.17918e+06	2.217e+06	2.2076e+06	2.05844e+06	1.91935e+06	1.81747e+06	1.81065e+06	1.82305e+06	1.80674e+06	1.79417e+06	1.77617e+06	1.79973e+06	1.76787e+06	1.75132e+06	1.70813e+06	1.66704e+06	1.62734e+06	1.66344e+06	1.63759e+06	1.62124e+06	1.59661e+06	1.56764e+06	1.5228e+06	1.49662e+06	1.48319e+06	1.49185e+06	1.48059e+06	1.46496e+06	1.44831e+06
geo	Georgia	High-middle SDI	FALSE	All cause deaths	57953.4	58602.5	59703.8	58916	56434.9	51484.6	48568.3	49719.5	51582.1	52781.8	53664.9	53702.8	56107.9	56913.2	57263.8	55907.6	53978.6	50972.7	51471.7	52215.4	53055.1	52930.8	51918.5	50459.3	49911	49931.3	50764.3	50546.1	49984.7	49418.4
deu	Germany	High SDI	TRUE	PM-equivalent emissions	8203.12	6467.62	5559.24	5200.49	4574.19	3874.08	3531.06	3251.6	2967.96	2774.89	2597.6	2532.88	2428.38	2398.3	2316.37	2241.16	2231.97	2221.62	2155.1	2006.85	2058.99	1993.42	1940.18	1906.79	1860.77	1822.36	1828.62	1766.77	1675.1	1581.89
deu	Germany	High SDI	TRUE	Fossil/industrial fraction	0.993004	0.991403	0.989779	0.98909	0.987709	0.985979	0.984334	0.976384	0.972594	0.972453	0.969252	0.966758	0.965904	0.960854	0.957343	0.951425	0.94652	0.944701	0.94106	0.931633	0.923439	0.92669	0.924872	0.923952	0.922424	0.916873	0.916614	0.911206	0.908038	0.904348
deu	Germany	High SDI	TRUE	Air pollution DALYs	1.336e+06	1.29666e+06	1.24457e+06	1.21488e+06	1.17744e+06	1.13919e+06	1.09314e+06	1.03436e+06	979080	934182	893768	856491	839335	817382	782825	762655	756762	765477	777182	793989	793821	772486	738748	704087	658395	639133	609665	590144	594640	601228
deu	Germany	High SDI	TRUE	Air pollution deaths	64605.2	62389.5	59662.2	58274.2	56476.3	54777.9	52513.9	49543	46882.6	44669.2	42523.6	40585	39939.9	38835.4	37008.1	36065.9	35762.1	36220	36838.1	37751.2	37803.4	36753.8	35286.2	33678	31460.1	30796.4	29459.5	28453.7	28769	29252.2
deu	Germany	High SDI	TRUE	All cause DALYs	2.78325e+07	2.77377e+07	2.74595e+07	2.74243e+07	2.73465e+07	2.72578e+07	2.70929e+07	2.67378e+07	2.64348e+07	2.63332e+07	2.62407e+07	2.61017e+07	2.6169e+07	2.61984e+07	2.59318e+07	2.58307e+07	2.57097e+07	2.56928e+07	2.57437e+07	2.58374e+07	2.58052e+07	2.57199e+07	2.57862e+07	2.60461e+07	2.6085e+07	2.65705e+07	2.67421e+07	2.68618e+07	2.70639e+07	2.73102e+07
deu	Germany	High SDI	TRUE	All cause deaths	902577	892223	876031	874224	871385	869826	863798	849038	838712	837446	835358	830951	838289	840572	829061	830331	827437	829231	834579	842687	845481	844605	856827	875438	880977	914373	925649	927773	939951	959889
gha	Ghana	Low-middle SDI	FALSE	PM-equivalent emissions	404.138	410.183	415.054	428.845	433.007	447.773	461.533	469.236	502.506	505.208	474.501	475.312	495.994	472.379	445.072	441.89	459.702	459.778	437.07	450.225	459.019	442.815	480.689	501.787	484.027	470.594	478.422	482.07	488.432	493.554
gha	Ghana	Low-middle SDI	FALSE	Fossil/industrial fraction	0.120985	0.119512	0.127667	0.125952	0.129333	0.131462	0.135668	0.140487	0.190035	0.202437	0.192975	0.209416	0.247205	0.240149	0.212928	0.243301	0.303389	0.319185	0.293912	0.313645	0.334656	0.306643	0.362743	0.387809	0.361353	0.343912	0.355377	0.359313	0.36797	0.374822
gha	Ghana	Low-middle SDI	FALSE	Air pollution DALYs	999105	976003	960320	946903	941221	942719	954648	976031	985614	1.00267e+06	1.01861e+06	1.03148e+06	1.04307e+06	1.06394e+06	1.07423e+06	1.08504e+06	1.09459e+06	1.09717e+06	1.07203e+06	1.059e+06	1.04612e+06	1.03799e+06	1.02118e+06	1.01266e+06	1.01321e+06	1.02179e+06	1.01579e+06	1.00052e+06	959267	942079
gha	Ghana	Low-middle SDI	FALSE	Air pollution deaths	17951.1	17783	17737.3	17665.9	17717.2	17878	18269.4	18877.1	19220.1	19715.1	20214.7	20719.8	21214	21689.1	22097.2	22549.1	23022.3	23302.2	23154.3	23179.9	23267.8	23448.3	23443.1	23557.2	23759.5	24219.8	24287.6	24222.1	23814	23792.1
gha	Ghana	Low-middle SDI	FALSE	All cause DALYs	1.05874e+07	1.05627e+07	1.0609e+07	1.06535e+07	1.0883e+07	1.0917e+07	1.10902e+07	1.14165e+07	1.14691e+07	1.16723e+07	1.19078e+07	1.21868e+07	1.23985e+07	1.25975e+07	1.27751e+07	1.2944e+07	1.30822e+07	1.31791e+07	1.31653e+07	1.31618e+07	1.31083e+07	1.29493e+07	1.28015e+07	1.27565e+07	1.27343e+07	1.27805e+07	1.27511e+07	1.26893e+07	1.24204e+07	1.22859e+07
gha	Ghana	Low-middle SDI	FALSE	All cause deaths	150383	151283	153120	154569	159342	160989	164900	171370	173671	178398	183435	189220	193853	198007	201692	205123	208137	210597	211449	212364	212606	210740	209066	209089	209537	211000	211300	211350	208834	208182
grc	Greece	High SDI	TRUE	PM-equivalent emissions	1148.15	1106.13	1153.26	1189.96	1235.57	1226.16	1195	1235.55	1315	1254.62	1289.78	1304.14	1240.75	1272.7	1266.85	1257.4	1229.59	1215.83	1113.72	1000.22	802.208	707.365	611.056	566.702	521.305	502.38	480.556	524.571	500.923	482.754
grc	Greece	High SDI	TRUE	Fossil/industrial fraction	0.979663	0.978895	0.979537	0.979938	0.980976	0.979822	0.979072	0.98027	0.981922	0.981118	0.981905	0.982733	0.979842	0.980717	0.980767	0.98159	0.981792	0.979737	0.97961	0.978891	0.973292	0.965333	0.956201	0.959091	0.956297	0.952544	0.955492	0.960083	0.958794	0.957853
grc	Greece	High SDI	TRUE	Air pollution DALYs	153625	154017	155291	154042	154640	155758	156738	157852	161076	163654	163354	161901	159759	157128	154215	151144	150787	155294	153320	153292	150603	149796	146356	137486	129201	124195	117032	113333	114319	114643
grc	Greece	High SDI	TRUE	Air pollution deaths	7362.32	7404.96	7499.82	7444.89	7492.06	7561.15	7602.53	7681.76	7872.17	8019.4	8011.28	7947.61	7873.71	7720.62	7517.6	7335.51	7356.03	7635.95	7567.68	7580.58	7485.74	7528.76	7442.35	6997.59	6588.75	6385.76	6047.39	5914.1	6105.65	6218.68
grc	Greece	High SDI	TRUE	All cause DALYs	3.04995e+06	3.08346e+06	3.12009e+06	3.1314e+06	3.15733e+06	3.1859e+06	3.20829e+06	3.22154e+06	3.25574e+06	3.29093e+06	3.29708e+06	3.29518e+06	3.29399e+06	3.30026e+06	3.30922e+06	3.31287e+06	3.30476e+06	3.35538e+06	3.32973e+06	3.33336e+06	3.31928e+06	3.33171e+06	3.3356e+06	3.28664e+06	3.26499e+06	3.29769e+06	3.30851e+06	3.31392e+06	3.36289e+06	3.38307e+06
grc	Greece	High SDI	TRUE	All cause deaths	91515.5	93108.3	94923.6	95232.2	96446.8	97886.6	98732.1	99050.3	100693	102108	102570	102589	102790	103121	102817	102609	102811	105911	105416	106080	106526	109345	112215	111514	112343	115682	117995	120264	125692	128669
grl	Greenland	High-middle SDI	FALSE	PM-equivalent emissions	0.0867291	0.0871258	0.0858951	0.11244	0.110062	0.109586	0.109591	0.109243	0.106905	0.10097	0.0902305	0.0877643	0.0786459	0.0507428	0.0515662	0.0467601	0.0449577	0.0444734	0.0426627	0.0417558	0.0421667	0.0422644	0.0423639	0.0423406	0.0425893	0.0426273	0.0426322	0.0426534	0.0426854	0.0427233
grl	Greenland	High-middle SDI	FALSE	Fossil/industrial fraction	0.660977	0.661121	0.676148	0.517883	0.522657	0.527965	0.530602	0.53399	0.529332	0.523342	0.489854	0.500515	0.445534	0.697175	0.68569	0.682398	0.700652	0.705815	0.727057	0.700243	0.651406	0.649177	0.646971	0.646777	0.648834	0.649141	0.649181	0.649355	0.649618	0.649929
grl	Greenland	High-middle SDI	FALSE	Air pollution DALYs	336.649	337.372	334.142	340.981	339.202	337.003	327.501	315.061	297.79	283.005	269.944	263.115	261.673	253.283	237.67	230.436	219.937	210.592	201.82	197.28	194.414	193.213	193.749	194.903	194.509	189.848	196.271	201.507	206.334	200.567
grl	Greenland	High-middle SDI	FALSE	Air pollution deaths	9.93622	9.98414	9.99781	10.5902	10.7107	10.7701	10.5703	10.2967	9.77648	9.32857	8.93977	8.80837	8.89148	8.63085	7.90934	7.73352	7.42283	7.1926	6.96779	6.92188	6.89543	6.90875	6.9753	7.06603	7.07083	6.86043	7.11329	7.29188	7.59024	7.38238
grl	Greenland	High-middle SDI	FALSE	All cause DALYs	23307.5	23241.4	23004.3	23326.7	23234.4	23177.4	22940.2	22677.4	22328.4	22083.9	21827.6	21655.8	21632.9	21399.8	20895.9	20863.7	20799.6	20694	20601.3	20522.9	20507.9	20459.4	20313.6	20216.9	20105.3	19953.1	19989.3	20033.6	20083.6	20113.2
grl	Greenland	High-middle SDI	FALSE	All cause deaths	439.876	442.073	442.198	461.649	464.541	466.634	464.863	463.264	458.314	455.851	452.925	452.386	455.184	448.735	430.165	433.341	436.938	439.408	441.529	443.434	446.813	449.863	450.394	452.296	454.067	454.733	462.113	468.144	474.489	480.459
grd	Grenada	Middle SDI	FALSE	PM-equivalent emissions	1.42578	1.55267	1.63249	1.58992	1.63152	1.73053	1.75485	2.04267	2.12464	2.11904	1.77913	2.11706	2.14072	2.18176	2.55977	2.40774	2.39015	2.45599	2.57122	2.62915	2.76587	2.54328	3.36749	3.72471	3.37748	3.41411	3.38616	2.61404	2.64874	2.57793
grd	Grenada	Middle SDI	FALSE	Fossil/industrial fraction	0.654241	0.676628	0.687262	0.667457	0.674643	0.688283	0.681119	0.708911	0.712434	0.694124	0.663857	0.709603	0.710465	0.727598	0.752376	0.757534	0.759721	0.767943	0.795057	0.788835	0.792419	0.769806	0.822581	0.835149	0.808847	0.80022	0.804589	0.757277	0.761458	0.755851
grd	Grenada	Middle SDI	FALSE	Air pollution DALYs	2067.5	1912.8	1810.16	1743.39	1648.52	1560.03	1474.52	1425.29	1389.46	1379.32	1354.85	1342.85	1319.95	1293.71	1276.77	1253.56	1242.9	1248.18	1269.92	1284.56	1302.77	1332.82	1353.72	1404.38	1451.41	1473.68	1485.17	1452.25	1468.65	1497.12
grd	Grenada	Middle SDI	FALSE	Air pollution deaths	85.5522	78.9504	75.1169	72.3635	67.4102	62.7967	58.3611	55.3584	53.2989	53.0729	51.8872	50.6635	49.0915	47.5213	46.3583	45.3131	44.883	44.8789	45.5624	46.1733	46.7245	47.3424	46.7925	48.6335	50.4013	51.2966	52.8427	51.8788	52.7078	53.9697
grd	Grenada	Middle SDI	FALSE	All cause DALYs	29359.4	28475.3	28389	28189.6	27872.2	27584	27472.4	27475.8	27661	28290.9	28698.7	29103.4	29538.1	29826.4	31090.8	30163.7	30140.9	30226.4	30511.3	30671.7	30922.9	31083.2	30880.8	31213.1	31611.4	31820.1	32254.7	32274.6	32341.3	32423.9
grd	Grenada	Middle SDI	FALSE	All cause deaths	823.824	793.434	790.997	784.919	758.185	731.94	709.016	690.185	682.226	700.002	704.952	706.194	709.48	709.439	730.855	709.779	708.861	711.316	721.051	730.211	738.573	739.971	716.788	731.228	748.468	760.418	795.538	802.049	810.005	818.501
gum	Guam	High-middle SDI	FALSE	PM-equivalent emissions	0.00122753	0.00119881	0.00107576	0.0029596	0.00284786	0.00271573	0.00257947	0.0024625	0.00234895	0.00222752	0.00212432	0.0020159	0.0020159	-6.15962e-20	-6.15962e-20	-6.15962e-20	-6.15962e-20	-6.15962e-20	-6.15962e-20	-6.15962e-20	-6.15962e-20	-6.15962e-20	-6.15962e-20	-6.15962e-20	-6.15962e-20	-6.15962e-20	-6.15962e-20	-6.15962e-20	-6.15962e-20	-6.15962e-20
gum	Guam	High-middle SDI	FALSE	Fossil/industrial fraction	0	0	0	0	0	0	0	0	0	0	0	0	0	0	0	0	0	0	0	0	0	0	0	0	0	0	0	0	0	0
gum	Guam	High-middle SDI	FALSE	Air pollution DALYs	725.778	752.867	769.924	782.502	788.386	776.248	765.497	754.32	737.364	727.348	728.712	739.187	749.111	751.464	752.896	748.306	757.704	760.817	771.941	789.858	804.673	858.516	989.839	1158.07	1312.08	1394.25	1217.23	1035.13	1061.04	1147.23
gum	Guam	High-middle SDI	FALSE	Air pollution deaths	20.9916	21.9041	22.4197	22.7334	22.7114	21.9835	21.464	21.1246	20.7985	20.697	20.9295	21.3458	21.6969	21.6264	21.2525	20.6094	20.923	21.1186	21.6178	22.3567	22.8542	24.511	28.9102	34.6337	39.7322	42.4699	36.9678	31.2609	32.3114	35.6446
gum	Guam	High-middle SDI	FALSE	All cause DALYs	31202.3	32274.9	33058.9	33828	34553.7	34848	35229.5	43163.3	36028.6	36492.4	37014.3	37435.8	37966.1	38247.6	38564.1	38619.4	39276.1	40015	40781.8	41497.3	42213.4	42441.6	43266.5	44384	45220.3	46009.5	46578.6	47111.8	47681.4	48392.2
gum	Guam	High-middle SDI	FALSE	All cause deaths	562.223	589.458	608.186	623.728	633.907	628.016	628.414	867.048	652.473	670.54	692.465	710.462	730.272	737.446	734.578	722.613	744.867	769.218	798.396	829.287	849.926	859.467	897.994	945.075	979.507	1011.4	1039.12	1064.83	1087.98	1127.68
gtm	Guatemala	Low-middle SDI	FALSE	PM-equivalent emissions	352.109	356.545	356.686	454.184	449.608	496.042	480.817	480.52	535.248	526.037	546.988	543.143	561.353	478.45	484.817	445.538	442.438	457.5	419.411	454.499	470.389	482.437	482.557	501.514	518.294	540.105	577.42	562.682	569.808	593.168
gtm	Guatemala	Low-middle SDI	FALSE	Fossil/industrial fraction	0.206198	0.219433	0.239947	0.228638	0.239468	0.243225	0.241493	0.250282	0.289677	0.270503	0.282357	0.295345	0.303267	0.38115	0.377885	0.420349	0.403378	0.400909	0.400618	0.398823	0.324184	0.330446	0.343676	0.356643	0.362077	0.385919	0.371071	0.367356	0.375851	0.400928
gtm	Guatemala	Low-middle SDI	FALSE	Air pollution DALYs	546403	549344	550383	546180	533654	507100	497437	501673	501865	490798	489771	476529	455827	438027	425571	408427	396857	380429	369034	363358	360754	356592	349724	342841	336974	332715	327664	316125	311778	311242
gtm	Guatemala	Low-middle SDI	FALSE	Air pollution deaths	9838.05	10173.7	10411.4	10492.1	10315.5	9657.56	9428.14	9688.02	9854.06	9691.58	9684.11	9510.64	9194.43	9023.1	8964.71	8813.02	8719.7	8539.6	8468.85	8573.09	8721.25	8806.89	8835.24	8885.47	8936.03	8988.03	8983.7	8854.55	8913.88	9065.3
gtm	Guatemala	Low-middle SDI	FALSE	All cause DALYs	4.83342e+06	4.85633e+06	4.83327e+06	4.77317e+06	4.73565e+06	4.5522e+06	4.45511e+06	4.50578e+06	4.5369e+06	4.42427e+06	4.44023e+06	4.44262e+06	4.4245e+06	4.42358e+06	4.44886e+06	4.55249e+06	4.54526e+06	4.5279e+06	4.56185e+06	4.67435e+06	4.67586e+06	4.67848e+06	4.68199e+06	4.71816e+06	4.75967e+06	4.8209e+06	4.89391e+06	4.93281e+06	5.03373e+06	5.1074e+06
gtm	Guatemala	Low-middle SDI	FALSE	All cause deaths	72828.7	74819.7	75655.9	75253	74570	70223.2	68089.8	69846.9	71132.7	69320.7	69930.8	70416.6	70421.2	71226.4	72445.3	75052.4	75405.9	75388.1	76583	79503.9	80462.3	81140.7	81798.9	83230	84658.2	86415	88285.7	89529	92331.1	94820.6
gin	Guinea	Low SDI	FALSE	PM-equivalent emissions	465.781	471.153	470.752	504.513	528.36	537.108	526.416	527.953	523.163	517.078	508.115	505.002	502.867	473.393	469.127	464.771	461.075	451.628	462.361	463.732	459.16	462.64	464.281	467.971	470.349	473.358	475.931	478.897	480.796	482.443
gin	Guinea	Low SDI	FALSE	Fossil/industrial fraction	0.0443472	0.04573	0.0448967	0.0434749	0.0440747	0.0447995	0.0476023	0.0467909	0.0502394	0.0537953	0.0568162	0.0603733	0.0609902	0.0665403	0.0696374	0.0741648	0.0764374	0.0800884	0.0904937	0.093603	0.103259	0.106582	0.109154	0.116105	0.122071	0.125851	0.128232	0.130284	0.13386	0.136948
gin	Guinea	Low SDI	FALSE	Air pollution DALYs	1.17938e+06	1.1819e+06	1.18272e+06	1.1771e+06	1.17786e+06	1.16994e+06	1.1505e+06	1.13648e+06	1.12102e+06	1.09414e+06	1.05513e+06	1.01477e+06	988160	977630	992898	981883	974038	964658	949218	918274	923295	911639	899785	915341	922666	930514	928110	904419	885877	853492
gin	Guinea	Low SDI	FALSE	Air pollution deaths	17654.8	17770.2	17896.2	17955.9	18122.2	18163.7	18079.6	18067.2	18059.4	17903.6	17580.9	17250	17104.2	17056.5	17354.2	17344.6	17411	17364.3	17257.5	16976.8	17113	17023.8	16934.6	17145.4	17268.7	17400.1	17300.9	16952.7	16710.5	16242.4
gin	Guinea	Low SDI	FALSE	All cause DALYs	7.81378e+06	7.90454e+06	8.00444e+06	8.04922e+06	8.15088e+06	8.19052e+06	8.11794e+06	8.14054e+06	8.16881e+06	8.11123e+06	8.07885e+06	7.93833e+06	7.84486e+06	7.77215e+06	7.7373e+06	7.71156e+06	7.71609e+06	7.7217e+06	7.71482e+06	7.74316e+06	7.73571e+06	7.73611e+06	7.75758e+06	7.79064e+06	8.00892e+06	7.96327e+06	7.84873e+06	7.71338e+06	7.58425e+06	7.47243e+06
gin	Guinea	Low SDI	FALSE	All cause deaths	108708	110194	112096	113162	115185	116463	116403	117517	118898	119308	120099	119132	118610	118141	118184	118234	118648	119002	118976	119491	119397	119399	119662	120124	124022	122709	120336	118171	116143	114265
gnb	Guinea-Bissau	Low SDI	FALSE	PM-equivalent emissions	51.6597	51.9192	50.9737	51.3102	54.5767	56.1294	56.1454	56.8756	57.7263	59.4129	58.7286	59.272	59.6935	58.6926	56.0907	54.6037	55.2879	55.3601	53.934	53.2948	54.0074	55.3209	55.546	54.6816	54.9288	55.2762	55.7454	56.2572	56.5418	56.7945
gnb	Guinea-Bissau	Low SDI	FALSE	Fossil/industrial fraction	0.114762	0.11644	0.119094	0.12222	0.117012	0.116192	0.118042	0.116077	0.110287	0.113593	0.114734	0.117818	0.116863	0.124842	0.133598	0.13186	0.133288	0.146115	0.148862	0.16503	0.169969	0.182905	0.184619	0.173364	0.17943	0.18205	0.185404	0.187617	0.191878	0.19563
gnb	Guinea-Bissau	Low SDI	FALSE	Air pollution DALYs	137151	136315	135603	134913	134483	133013	133572	130722	128088	127097	127326	127226	126577	125722	124769	122249	120150	124995	123078	119593	116975	113328	108997	108750	107728	105294	104810	102176	97974.9	95684
gnb	Guinea-Bissau	Low SDI	FALSE	Air pollution deaths	2252.87	2242.81	2235.71	2228.57	2224.65	2209.88	2218.02	2185.26	2160.64	2151.78	2156.44	2163.76	2170.04	2172.63	2183	2161.29	2150.01	2216.89	2205.44	2178.11	2156.56	2124.62	2086.44	2093.5	2093.8	2077.25	2081.7	2060.71	2017	1998.3
gnb	Guinea-Bissau	Low SDI	FALSE	All cause DALYs	1.22205e+06	1.22016e+06	1.22035e+06	1.22023e+06	1.23625e+06	1.22012e+06	1.29973e+06	1.27897e+06	1.27497e+06	1.2952e+06	1.21657e+06	1.21179e+06	1.20726e+06	1.2015e+06	1.19514e+06	1.21628e+06	1.17198e+06	1.15096e+06	1.14549e+06	1.11241e+06	1.0893e+06	1.06658e+06	1.05122e+06	1.03681e+06	1.03027e+06	1.01672e+06	999678	983017	969130	952859
gnb	Guinea-Bissau	Low SDI	FALSE	All cause deaths	17147.9	17128.4	17147.9	17165.5	17373.6	17210.7	18175.4	17964.8	18172.1	18407.1	17396.3	17384.4	17397.1	17396.3	17420	17692.7	17217.4	16971.4	16884	16534.9	16254.8	15987	15824.4	15674.7	15656.2	15508.2	15313.6	15144.4	15012.5	14816.4
guy	Guyana	Low-middle SDI	FALSE	PM-equivalent emissions	35.4703	35.7826	37.0275	43.181	43.7825	43.149	43.0068	42.5895	44.8899	44.1144	44.8756	44.8342	44.263	38.3148	39.6244	38.204	36.781	37.7615	35.5854	36.5768	38.5028	38.5768	43.1169	44.2419	43.2067	43.4632	43.599	39.3872	39.6712	40.1119
guy	Guyana	Low-middle SDI	FALSE	Fossil/industrial fraction	0.210653	0.224744	0.210188	0.198869	0.220201	0.222148	0.236683	0.2444	0.269667	0.273137	0.269301	0.270641	0.290163	0.348365	0.343473	0.327665	0.314606	0.332223	0.363324	0.373925	0.367867	0.349971	0.435276	0.454369	0.437356	0.437941	0.443659	0.38828	0.393984	0.401857
guy	Guyana	Low-middle SDI	FALSE	Air pollution DALYs	21932.6	20803.9	19874.3	20145.3	19483.6	19404.3	19522.8	19522.8	19301	18747.2	19011.1	18564.7	18427.5	17836.3	17445.6	16942.7	16327.2	16166.4	16001.9	15585.4	15559.4	15462.3	15615.8	15452.2	15783.6	15718.4	15425.5	15065.7	14875.6	14577.9
guy	Guyana	Low-middle SDI	FALSE	Air pollution deaths	596.571	561.918	540.422	560.034	545.85	547.156	552.053	547.813	542.887	520.653	533.853	533.324	534.798	523.24	513.902	499.775	483.764	484.025	483.024	473.443	478.529	477.793	484.781	484.295	495.728	496.758	490.122	479.828	474.649	466.153
guy	Guyana	Low-middle SDI	FALSE	All cause DALYs	354747	344415	332625	334861	330612	334719	336367	331559	330022	323682	325650	324365	325185	321125	318460	317938	309516	305884	306217	299248	302617	304828	307772	304915	306496	302725	303634	307545	309433	308892
guy	Guyana	Low-middle SDI	FALSE	All cause deaths	6496.19	6239.74	6028.86	6217.79	6152.5	6267.86	6307.54	6166.38	6129.4	5924.68	6037.49	6118.18	6221.13	6203.76	6197.57	6185.15	6038.1	6049.09	6118.7	6022.52	6183.34	6268.97	6395.31	6404.3	6494.99	6448.16	6495.66	6588.4	6654.84	6683.8
hti	Haiti	Low SDI	FALSE	PM-equivalent emissions	69.3254	70.0235	72.5003	67.6643	64.0602	72.961	82.6457	90.0477	91.2831	88.4185	87.9702	88.944	98.8813	96.4372	96.7007	117.44	119.014	125.048	125.632	127.996	129.697	132.866	142.016	143.63	151.063	153.966	155.843	157.463	159.026	158.331
hti	Haiti	Low SDI	FALSE	Fossil/industrial fraction	0.408336	0.404942	0.36824	0.354534	0.298985	0.373889	0.366908	0.392316	0.391211	0.396773	0.40233	0.415414	0.389275	0.387194	0.400454	0.399609	0.394466	0.410986	0.412497	0.406714	0.400152	0.398895	0.423274	0.423521	0.455663	0.457348	0.457758	0.458421	0.463914	0.461727
hti	Haiti	Low SDI	FALSE	Air pollution DALYs	657226	635994	624213	611570	597937	589104	580798	579424	561037	556735	548843	547172	544328	545101	548497	551560	554598	557746	560872	563549	565945	575663	571576	577205	581694	584886	585108	576219	571618	567306
hti	Haiti	Low SDI	FALSE	Air pollution deaths	12705.8	12447.7	12364.1	12272.7	12135.7	12054	11919.2	11939.5	11693.8	11724.7	11721.7	11823	11887	12033.5	12198.7	12359.7	12511.3	12676.3	12824.6	12958.9	12980	13202.6	13297.3	13475.7	13647.4	13806.7	13903.5	13901.3	13972.4	14017.5
hti	Haiti	Low SDI	FALSE	All cause DALYs	5.51697e+06	5.56303e+06	5.56213e+06	5.70264e+06	5.71206e+06	5.64182e+06	5.6287e+06	5.61989e+06	5.5883e+06	5.56019e+06	5.54693e+06	5.55644e+06	5.57019e+06	5.60728e+06	5.98437e+06	5.68109e+06	5.68971e+06	5.69593e+06	5.7505e+06	5.73481e+06	1.93481e+07	6.27725e+06	5.85063e+06	5.92637e+06	5.94245e+06	5.97681e+06	6.02642e+06	5.88969e+06	5.87697e+06	5.89085e+06
hti	Haiti	Low SDI	FALSE	All cause deaths	84016.8	85092.7	85518.1	88487.1	88898.2	88246.4	88382.4	88704.2	88569.5	88565.3	88929.2	89572.5	90229.5	91307.8	97805	93237	93599.9	93942.9	95085.1	95071.7	319264	100817	96140.8	97337.4	97984.9	98874.9	99931.7	98477.5	98905.4	99707.8
hnd	Honduras	Low-middle SDI	FALSE	PM-equivalent emissions	153.767	153.253	155.332	177.095	180.424	198.54	197.436	203.74	221.647	201.877	214.869	224.934	231.813	222.759	249.602	254.227	243.608	285.227	274.648	263.786	258.77	281.576	276.168	281.154	300.273	328.052	314.352	311.684	316.859	319.855
hnd	Honduras	Low-middle SDI	FALSE	Fossil/industrial fraction	0.266529	0.270989	0.291447	0.261882	0.283823	0.342664	0.350766	0.351631	0.373897	0.401697	0.413368	0.454335	0.46645	0.531069	0.564984	0.570469	0.522943	0.569911	0.577931	0.54911	0.559981	0.581977	0.552922	0.568593	0.586472	0.59732	0.575723	0.575259	0.582951	0.587558
hnd	Honduras	Low-middle SDI	FALSE	Air pollution DALYs	150981	149780	150850	148783	146939	150253	149597	147386	145105	142914	140041	139187	137801	137721	138227	138666	139621	140484	141284	143665	147750	153888	160551	163209	164669	165799	164149	161702	162790	164891
hnd	Honduras	Low-middle SDI	FALSE	Air pollution deaths	3119.15	3120.82	3251.15	3253.59	3274.11	3523.43	3677.78	3674.79	3669.51	3676.8	3680.08	3720.55	3749.65	3798.03	3858.68	3908.3	3982.42	4060.52	4180.79	4354.59	4598.89	4972.95	5409.85	5514.71	5585.25	5638.73	5616.06	5566.83	5630.73	5720.34
hnd	Honduras	Low-middle SDI	FALSE	All cause DALYs	1.91414e+06	1.91169e+06	1.92924e+06	1.96115e+06	1.94661e+06	1.97283e+06	1.96661e+06	1.96923e+06	2.89141e+06	1.98496e+06	1.98562e+06	1.99886e+06	2.00926e+06	2.03727e+06	2.04925e+06	2.06903e+06	2.09899e+06	2.13406e+06	2.16428e+06	2.19342e+06	2.24803e+06	2.27312e+06	2.56897e+06	2.57577e+06	2.60827e+06	2.67701e+06	2.42373e+06	2.46166e+06	2.50299e+06	2.55729e+06
hnd	Honduras	Low-middle SDI	FALSE	All cause deaths	27617.3	27673.3	28513.3	29134.7	29114	30547.7	31408.1	31665.2	46511.9	32275.2	32585.5	33094.9	33620.1	34388.6	34960.4	35569.2	36386.2	37343	38538.4	39895.9	41889.4	43997.5	51023.9	51389.1	52172.6	53528.6	49508.3	50417.5	51404	52569.3
hun	Hungary	High-middle SDI	FALSE	PM-equivalent emissions	1102.22	1079.62	926.617	928.926	835.075	817.94	821.616	830.306	767.472	765.122	624.655	545.193	464.457	441.381	344.963	248.466	240.188	234.775	222.787	224.378	228.564	232.311	226.256	224.997	209.963	212.261	203.667	204.822	199.703	191.219
hun	Hungary	High-middle SDI	FALSE	Fossil/industrial fraction	0.975147	0.972893	0.967988	0.966711	0.963511	0.960727	0.960869	0.961601	0.959221	0.958477	0.950102	0.940355	0.933212	0.927392	0.908685	0.798246	0.789929	0.767352	0.77829	0.702909	0.676387	0.659414	0.637465	0.628429	0.663096	0.649184	0.647733	0.664881	0.660493	0.649727
hun	Hungary	High-middle SDI	FALSE	Air pollution DALYs	399118	395004	404172	401188	385675	373083	346354	333114	326716	316962	293421	280974	278902	277911	271559	272649	264454	264007	254347	252287	245575	239153	232959	221083	215433	213290	200501	196822	196446	191495
hun	Hungary	High-middle SDI	FALSE	Air pollution deaths	16250.3	16054.7	16412.8	16329.4	15707.2	15342.6	14346.8	13849	13578.1	13207.6	12243.2	11757.6	11719.3	11729.1	11475.9	11570.2	11243.8	11289.2	10925.6	10912.8	10696.1	10473.9	10251.8	9761.61	9533.72	9488.33	8924.67	8856.12	8886.76	8616.98
hun	Hungary	High-middle SDI	FALSE	All cause DALYs	4.67437e+06	4.67435e+06	4.79014e+06	4.79951e+06	4.71635e+06	4.64069e+06	4.45449e+06	4.41083e+06	4.44427e+06	4.42675e+06	4.25763e+06	4.16099e+06	4.15336e+06	4.16198e+06	4.11021e+06	4.14013e+06	4.06813e+06	4.07148e+06	3.9671e+06	3.95027e+06	3.88386e+06	3.83701e+06	3.79568e+06	3.71634e+06	3.71893e+06	3.76244e+06	3.69755e+06	3.71857e+06	3.7436e+06	3.70494e+06
hun	Hungary	High-middle SDI	FALSE	All cause deaths	143198	142761	147359	148254	145373	144226	138404	137722	139544	139819	133829	130863	131451	132786	131294	133551	131163	132483	129262	130115	129029	128387	127626	125090	125992	129048	126432	128708	130770	128868
isl	Iceland	High SDI	FALSE	PM-equivalent emissions	35.3393	31.8526	35.0487	37.6253	37.4772	38.5573	39.9485	40.6757	40.8063	40.1471	41.3272	37.2008	40.5803	39.5616	39.7553	37.6342	36.0231	41.8295	44.4934	43.6704	42.3635	40.8723	40.5509	38.5173	37.8084	38.9272	37.4544	39.699	40.045	36.1757
isl	Iceland	High SDI	FALSE	Fossil/industrial fraction	0.992587	0.991574	0.99187	0.992088	0.992597	0.993632	0.99314	0.994211	0.994207	0.994075	0.994344	0.994058	0.994404	0.994851	0.993993	0.994711	0.995172	0.994061	0.995158	0.99276	0.993856	0.993035	0.995686	0.995817	0.995233	0.995825	0.995422	0.995623	0.995712	0.99531
isl	Iceland	High SDI	FALSE	Air pollution DALYs	706.212	687.812	672.823	650.479	638.956	634.473	622.588	612.623	600.621	589.831	575.704	570.307	565.195	546.54	527.309	519.136	517.818	522.486	519.493	519.025	512.454	494.804	475.145	442.916	406.297	386.909	378.367	374.114	391.466	395.391
isl	Iceland	High SDI	FALSE	Air pollution deaths	32.2788	31.5723	31.1601	30.2963	30.0032	29.9162	29.4559	29.0728	28.5189	27.9699	27.2148	27.116	27.0911	26.1885	25.1679	24.7491	24.6866	25.015	24.8229	24.9027	24.6393	23.9143	23.1193	21.5114	19.424	18.283	17.7304	17.2473	18.4914	18.7573
isl	Iceland	High SDI	FALSE	All cause DALYs	63056.3	63403	63488	63679.3	64147.9	65981.1	64735.8	64794.3	64862.2	64962	64821	65108.8	65464.5	65565.2	65988.7	66692.5	67875.4	68834.3	69430.4	70013.6	70205	70418.1	70960.2	71266.8	71021.6	72198.6	73443.5	74826.9	75932.6	77274.8
isl	Iceland	High SDI	FALSE	All cause deaths	1726.52	1744.56	1759.72	1769.44	1795.4	1887.39	1822.96	1819.05	1807.4	1781.49	1748.64	1756.28	1774.93	1768.77	1774.43	1793.99	1827.32	1849.08	1850.8	1867.95	1874.36	1894.22	1927.47	1934.58	1895.56	1936.63	1976.77	2020.14	2061.22	2113.29
ind	India	Low-middle SDI	TRUE	PM-equivalent emissions	12700.2	13142.4	13522.2	13821	14240.7	14777.7	15126.7	15435.4	15664.1	16230.2	16387.4	16713	16976.7	17433.5	18132	18755.8	19629.5	20816.5	21671.3	22854.9	23597.8	24033	24619	24739.9	25732.8	25968.3	26012.8	26529.7	26820.1	26516.1
ind	India	Low-middle SDI	TRUE	Fossil/industrial fraction	0.64224	0.649857	0.655764	0.661146	0.666728	0.675442	0.680776	0.684866	0.686443	0.692505	0.691172	0.690396	0.688468	0.690857	0.696879	0.707497	0.727656	0.73008	0.728987	0.73189	0.729328	0.724194	0.735023	0.740997	0.755861	0.763984	0.758476	0.764995	0.768143	0.766077
ind	India	Low-middle SDI	TRUE	Air pollution DALYs	6.88586e+07	6.81367e+07	6.76195e+07	6.65298e+07	6.56176e+07	6.48442e+07	6.44904e+07	6.53114e+07	6.48402e+07	6.35143e+07	6.26651e+07	6.19641e+07	6.13108e+07	6.02004e+07	5.85691e+07	5.85942e+07	5.88213e+07	5.90366e+07	5.91781e+07	5.80118e+07	5.76674e+07	5.78874e+07	5.81307e+07	5.79619e+07	5.66252e+07	5.64491e+07	5.46846e+07	5.34392e+07	5.35104e+07	5.35015e+07
ind	India	Low-middle SDI	TRUE	Air pollution deaths	1.33268e+06	1.34061e+06	1.34339e+06	1.3366e+06	1.33069e+06	1.3227e+06	1.34279e+06	1.40237e+06	1.41275e+06	1.3854e+06	1.38743e+06	1.40454e+06	1.41049e+06	1.39146e+06	1.34167e+06	1.3732e+06	1.42087e+06	1.45893e+06	1.49311e+06	1.4618e+06	1.4594e+06	1.49783e+06	1.54102e+06	1.58477e+06	1.59196e+06	1.60798e+06	1.6002e+06	1.60411e+06	1.64471e+06	1.66733e+06
ind	India	Low-middle SDI	TRUE	All cause DALYs	5.36602e+08	5.37558e+08	5.38265e+08	5.31048e+08	5.23041e+08	5.18569e+08	5.15624e+08	5.22044e+08	5.2298e+08	5.2033e+08	5.17795e+08	5.15712e+08	5.09526e+08	5.0257e+08	4.98844e+08	5.01505e+08	5.02085e+08	5.01657e+08	5.01896e+08	4.94159e+08	4.92474e+08	4.93052e+08	4.88706e+08	4.84363e+08	4.74077e+08	4.72191e+08	4.64157e+08	4.62222e+08	4.66665e+08	4.67876e+08
ind	India	Low-middle SDI	TRUE	All cause deaths	8.27821e+06	8.3775e+06	8.44963e+06	8.35185e+06	8.23676e+06	8.17069e+06	8.21855e+06	8.50295e+06	8.59175e+06	8.53177e+06	8.54466e+06	8.60553e+06	8.56407e+06	8.4329e+06	8.25739e+06	8.411e+06	8.58287e+06	8.71126e+06	8.84568e+06	8.65571e+06	8.64067e+06	8.78606e+06	8.8414e+06	8.97283e+06	8.92088e+06	8.96979e+06	8.94618e+06	9.03677e+06	9.27472e+06	9.39155e+06
idn	Indonesia	Middle SDI	TRUE	PM-equivalent emissions	6857.86	6867.58	8950.77	9178.87	9318.8	9410.63	7923.6	8616.99	8619.59	8110.58	8274.96	9175.7	7053.3	7060.43	7539.84	7742	8020.36	7967.55	8162.78	8415.79	9015.53	9535.67	10087.9	10135.3	10418.8	10056.5	10235.1	10525.9	10924.7	11295.7
idn	Indonesia	Middle SDI	TRUE	Fossil/industrial fraction	0.28098	0.29169	0.231291	0.23579	0.235582	0.257008	0.303808	0.302157	0.300062	0.339438	0.332422	0.317732	0.431842	0.452124	0.453273	0.472718	0.474251	0.51424	0.523777	0.522772	0.484872	0.508674	0.527574	0.527737	0.539216	0.523438	0.533222	0.54626	0.563335	0.578187
idn	Indonesia	Middle SDI	TRUE	Air pollution DALYs	7.9413e+06	7.69236e+06	7.46199e+06	7.27557e+06	7.09439e+06	6.92744e+06	6.77205e+06	6.64771e+06	6.57809e+06	6.49271e+06	6.43027e+06	6.41698e+06	6.39913e+06	6.38449e+06	6.36721e+06	6.37964e+06	6.39864e+06	6.4241e+06	6.47801e+06	6.50646e+06	6.50376e+06	6.47906e+06	6.45773e+06	6.40237e+06	6.30549e+06	6.24221e+06	6.04619e+06	5.89514e+06	5.87287e+06	5.87508e+06
idn	Indonesia	Middle SDI	TRUE	Air pollution deaths	169174	167220	165784	165002	163919	163065	162475	162527	163155	163509	164777	166645	168688	170997	173436	176888	180119	183353	186824	189543	191872	193582	194608	194152	192481	191708	187296	183668	184877	186267
idn	Indonesia	Middle SDI	TRUE	All cause DALYs	8.56203e+07	8.42461e+07	8.30752e+07	8.19919e+07	8.10582e+07	8.02288e+07	7.9537e+07	7.92974e+07	7.95194e+07	7.96095e+07	7.93394e+07	7.9399e+07	7.93554e+07	7.92711e+07	8.84399e+07	7.86209e+07	7.87507e+07	7.81102e+07	7.78414e+07	7.77273e+07	7.73388e+07	7.69338e+07	7.67952e+07	7.68549e+07	7.68293e+07	7.69588e+07	7.68282e+07	7.70936e+07	7.74086e+07	7.74328e+07
idn	Indonesia	Middle SDI	TRUE	All cause deaths	1.37382e+06	1.36595e+06	1.36348e+06	1.36177e+06	1.361e+06	1.36156e+06	1.36378e+06	1.37509e+06	1.39316e+06	1.4106e+06	1.42261e+06	1.43731e+06	1.45398e+06	1.47082e+06	1.65148e+06	1.5003e+06	1.52285e+06	1.53158e+06	1.54481e+06	1.55929e+06	1.56916e+06	1.57944e+06	1.59234e+06	1.6068e+06	1.62131e+06	1.6372e+06	1.65256e+06	1.67179e+06	1.69242e+06	1.70589e+06
irn	Iran (Islamic Republic of)	High-middle SDI	TRUE	PM-equivalent emissions	2482.45	2695	2831.15	2929.92	3289.18	3299.49	3447.01	3583.01	3628.41	3883.04	3971.9	4203.6	4126.43	4107.15	4311.82	4636.39	4879.9	5040.22	5099.61	5119.16	5018.48	5155.98	4983.99	4877.36	4895.05	4745.96	4099.29	4183.46	4073.46	4071.1
irn	Iran (Islamic Republic of)	High-middle SDI	TRUE	Fossil/industrial fraction	0.996267	0.9964	0.996425	0.996303	0.996591	0.996586	0.996707	0.996738	0.996749	0.996941	0.99695	0.99704	0.996509	0.996112	0.995824	0.994843	0.995033	0.995098	0.995153	0.995174	0.995061	0.995578	0.995409	0.995291	0.995285	0.995135	0.994663	0.99495	0.995042	0.995293
irn	Iran (Islamic Republic of)	High-middle SDI	TRUE	Air pollution DALYs	1.32325e+06	1.26611e+06	1.21839e+06	1.19179e+06	1.18363e+06	1.17755e+06	1.1738e+06	1.17888e+06	1.18184e+06	1.1827e+06	1.17564e+06	1.16438e+06	1.15079e+06	1.14048e+06	1.12957e+06	1.12494e+06	1.12933e+06	1.1351e+06	1.14492e+06	1.15696e+06	1.16218e+06	1.16253e+06	1.17555e+06	1.19674e+06	1.21022e+06	1.21582e+06	1.18816e+06	1.17836e+06	1.17853e+06	1.19033e+06
irn	Iran (Islamic Republic of)	High-middle SDI	TRUE	Air pollution deaths	30463.1	30107.7	29943.7	30061.2	30479.2	30968.3	31539.4	32304.9	33045.2	33802.6	34452.3	34919.9	35101.5	35213.9	35158.1	35278.3	35656.1	36027.2	36472.6	37089.2	37449.3	37502	38072.5	39287.5	40412	41746.3	42017.1	42243.1	42453.9	43202.6
irn	Iran (Islamic Republic of)	High-middle SDI	TRUE	All cause DALYs	2.50077e+07	2.15767e+07	2.05997e+07	2.01579e+07	1.99029e+07	1.97609e+07	1.9677e+07	1.9828e+07	1.9659e+07	1.96308e+07	1.95084e+07	1.94372e+07	1.9363e+07	2.09905e+07	1.95334e+07	1.95922e+07	1.96428e+07	1.97264e+07	1.98334e+07	1.993e+07	2.00328e+07	2.01057e+07	2.02158e+07	2.03082e+07	2.02476e+07	2.00894e+07	1.97379e+07	1.97332e+07	1.97826e+07	1.98287e+07
irn	Iran (Islamic Republic of)	High-middle SDI	TRUE	All cause deaths	357195	308446	299346	296604	295722	296612	298361	303895	304483	307823	310059	313403	316291	346779	324417	327694	330672	333236	336089	340100	344770	348299	353019	360181	366061	373443	375596	381220	385136	391113
irq	Iraq	Low-middle SDI	TRUE	PM-equivalent emissions	750.074	611.647	973.309	1326.22	1510.16	1462.05	1443.93	1780.34	1208.75	860.122	1018.46	1179.73	1147.83	1063.82	1125.94	988.082	943.819	837.051	1064.75	1339.17	1409.96	1465.61	1639.42	1819.65	1913.87	1857.96	1958.89	1777.74	1748.2	1736.21
irq	Iraq	Low-middle SDI	TRUE	Fossil/industrial fraction	0.992093	0.989356	0.992713	0.994112	0.994427	0.993803	0.993297	0.994214	0.991027	0.986802	0.988257	0.989273	0.988198	0.986415	0.986234	0.983226	0.981662	0.978726	0.982881	0.986013	0.986194	0.986362	0.98748	0.988413	0.988693	0.988336	0.988929	0.987789	0.987602	0.987549
irq	Iraq	Low-middle SDI	TRUE	Air pollution DALYs	696552	715635	740985	756975	763666	777763	795419	807541	812221	811338	807310	799181	794175	804001	797524	786835	780962	791124	803683	814746	819081	817644	811350	803396	798020	797814	793112	790807	798969	812427
irq	Iraq	Low-middle SDI	TRUE	Air pollution deaths	15941.5	16271.7	16828.6	17240.9	17406.8	17870.3	18373.2	18791.7	19040	19197.3	19316.4	19369.9	19496.4	19920.5	20024.4	20052.5	20164.6	20851.5	21606.8	22186.5	22560.3	22793.4	22909.3	22961.6	23096.3	23419	23583.9	23818.8	24602	25626.1
irq	Iraq	Low-middle SDI	TRUE	All cause DALYs	7.83573e+06	8.18107e+06	8.61063e+06	8.86536e+06	9.10826e+06	9.29453e+06	9.41019e+06	9.53746e+06	9.54935e+06	9.54466e+06	9.54629e+06	9.50918e+06	9.50686e+06	1.06011e+07	1.0673e+07	1.05737e+07	1.12327e+07	1.18459e+07	1.03879e+07	1.00258e+07	9.95403e+06	1.00322e+07	1.02061e+07	1.09667e+07	1.22353e+07	1.17885e+07	1.19674e+07	1.17956e+07	1.02049e+07	1.02942e+07
irq	Iraq	Low-middle SDI	TRUE	All cause deaths	118805	122987	128886	132705	136013	139243	141396	143824	144249	144414	144725	144536	145218	162468	164306	171481	186022	186008	165682	161165	160802	162296	165154	177289	197596	191898	195845	194607	173715	179615
irl	Ireland	High SDI	FALSE	PM-equivalent emissions	362.571	364.852	356.29	348.621	363.371	353.456	342.321	359.801	379.39	359.835	340.479	340.543	301.714	276.967	264.95	263.048	252.333	241.27	219.809	194.008	176.095	165.822	168.046	169.43	163.885	166.155	165.357	164.793	162.131	157.176
irl	Ireland	High SDI	FALSE	Fossil/industrial fraction	0.995875	0.996121	0.996516	0.996364	0.99658	0.996569	0.996347	0.996636	0.996321	0.996656	0.996325	0.996063	0.995399	0.994887	0.993613	0.991712	0.991717	0.989886	0.989809	0.987704	0.985375	0.986267	0.982857	0.980945	0.978809	0.980317	0.978912	0.976676	0.976571	0.976087
irl	Ireland	High SDI	FALSE	Air pollution DALYs	32418.1	31384.2	30379.3	29862.6	28822.3	28504.2	27347	26317.4	25598.5	24944.8	23740.7	22210.5	21220.2	20175.5	19353.3	18372.5	17870.2	17417.8	17031.1	16786.5	15687.6	15587.2	14951.9	14163.9	12990.9	12201.7	11131.7	10684.4	10950.9	11663.9
irl	Ireland	High SDI	FALSE	Air pollution deaths	1551.79	1513.06	1477.54	1462.94	1418.13	1409.35	1358.36	1305.66	1274.24	1246.96	1179.54	1094.99	1043.57	989.168	942.177	893.364	867.974	842.24	815.043	799.425	742.025	741.025	716.385	680.239	617.399	580.527	528.789	507.764	519.588	552.466
irl	Ireland	High SDI	FALSE	All cause DALYs	1.03908e+06	1.03531e+06	1.03276e+06	1.03723e+06	1.03463e+06	1.05087e+06	1.05268e+06	1.05944e+06	1.06463e+06	1.07506e+06	1.07375e+06	1.06445e+06	1.06067e+06	1.05748e+06	1.06172e+06	1.06334e+06	1.07322e+06	1.07873e+06	1.09097e+06	1.10262e+06	1.0908e+06	1.10834e+06	1.11269e+06	1.11614e+06	1.11825e+06	1.12654e+06	1.1349e+06	1.15243e+06	1.17023e+06	1.18636e+06
irl	Ireland	High SDI	FALSE	All cause deaths	30773.6	30665.3	30715.7	31006.4	30782.3	31329	31230.3	31200.4	31191	31457.7	30884.7	29901	29346.4	28758.6	28399.5	28029.2	28118.3	27915.9	27973.2	28166.9	27549.6	28415.5	28833.5	29117.6	29278.5	29825.5	30117	30750.9	31554.2	32354.4
isr	Israel	High-middle SDI	TRUE	PM-equivalent emissions	464.11	469.93	491.16	542.031	578.523	607.313	608.386	629.168	606.92	622.439	654.045	659.283	710.056	720.628	681.719	654.768	650.495	648.073	610.886	589.063	627.277	602.159	691.592	528.667	434.43	555.738	513.52	512.899	497.293	512.347
isr	Israel	High-middle SDI	TRUE	Fossil/industrial fraction	0.99925	0.999232	0.999232	0.999238	0.999288	0.99925	0.999228	0.999197	0.999109	0.99912	0.999154	0.999108	0.999152	0.999138	0.999035	0.99892	0.998886	0.998823	0.998722	0.998321	0.998463	0.998332	0.998869	0.997587	0.996851	0.997434	0.997323	0.997398	0.997393	0.997542
isr	Israel	High-middle SDI	TRUE	Air pollution DALYs	51944.3	55638.2	58930.4	59028.9	59502.2	59850.2	58802.5	58155.5	57650.3	56396.4	55627.1	54639.2	54476.2	54206.1	53220.9	53188.9	53174	54220.2	54200.1	54081.2	54376.2	55092.2	54698.4	54100.8	53162.9	53237.3	50962.7	49773.8	50772.6	51918.9
isr	Israel	High-middle SDI	TRUE	Air pollution deaths	2307.45	2495.3	2660.62	2686.77	2725.32	2767.33	2724.94	2696.58	2683.25	2632.74	2592.7	2543.08	2536.98	2537.84	2487.16	2488.43	2480.12	2538.63	2519.78	2499.01	2510.25	2557.96	2537.31	2506.28	2460.9	2473.8	2371.45	2342.7	2403.54	2455.58
isr	Israel	High-middle SDI	TRUE	All cause DALYs	1.16571e+06	1.20579e+06	1.24973e+06	1.26204e+06	1.29156e+06	1.31903e+06	1.34826e+06	1.36596e+06	1.38191e+06	1.39703e+06	1.42662e+06	1.4633e+06	1.52806e+06	1.50365e+06	1.50601e+06	1.50552e+06	1.5438e+06	1.5447e+06	1.57965e+06	1.58958e+06	1.57288e+06	1.59971e+06	1.61711e+06	1.63368e+06	1.75507e+06	1.69299e+06	1.71922e+06	1.75324e+06	1.79979e+06	1.83419e+06
isr	Israel	High-middle SDI	TRUE	All cause deaths	29137.7	30696	32242.7	32544.9	33415.1	34506.2	35046.7	35488.3	36189.6	36562.2	37028.8	37334.3	38578.7	38216.2	38077	38297.6	38813.7	39091.5	39317.5	39229.6	39161.4	40262.5	40799.9	41315.1	43641.2	43303.7	43840.1	45003.3	46738.6	47925.3
ita	Italy	High SDI	TRUE	PM-equivalent emissions	3561.91	3466.74	3373.51	3215.83	3068.54	3001.24	2820.69	2693.1	2503.67	2333.91	2158.79	2103.62	2042.9	1985.62	1908.73	1812.74	1766.43	1718.27	1634.01	1476.98	1497.15	1358.97	1306.15	1207.32	1141.02	1125.02	1138.82	1115.51	1101.86	1051.36
ita	Italy	High SDI	TRUE	Fossil/industrial fraction	0.990404	0.98921	0.988307	0.988143	0.986301	0.985771	0.984946	0.983756	0.982078	0.979582	0.978112	0.977048	0.968546	0.954698	0.961717	0.946048	0.937566	0.91805	0.903315	0.894686	0.898399	0.917371	0.890865	0.881705	0.888633	0.880679	0.886595	0.87951	0.880565	0.87746
ita	Italy	High SDI	TRUE	Air pollution DALYs	896164	883182	855079	834075	819246	802542	786966	779839	779280	762629	736459	717752	706703	701077	670044	656547	644434	634774	627354	619769	606459	599145	587085	565541	546125	540574	502098	484728	495825	504650
ita	Italy	High SDI	TRUE	Air pollution deaths	43047.6	42768.9	41591.5	40952.8	40546.9	40040.7	39580.8	39539.3	39786.8	38986.9	37668.4	36724.7	36301.2	36023.5	33913.4	33253.9	32789.4	32472.9	32233.3	31914	31292.4	31251.9	31043.1	30096.4	29353.1	29441.7	27300.9	26317.1	27243.6	27902.1
ita	Italy	High SDI	TRUE	All cause DALYs	1.81944e+07	1.83358e+07	1.82649e+07	1.81882e+07	1.81708e+07	1.81094e+07	1.80331e+07	1.78871e+07	1.78675e+07	1.77082e+07	1.75452e+07	1.74731e+07	1.74569e+07	1.75403e+07	1.73155e+07	1.73175e+07	1.7318e+07	1.73854e+07	1.74544e+07	1.75164e+07	1.74557e+07	1.75318e+07	1.75769e+07	1.74941e+07	1.74561e+07	1.76833e+07	1.75966e+07	1.77069e+07	1.79101e+07	1.80828e+07
ita	Italy	High SDI	TRUE	All cause deaths	531977	540506	539133	541001	544881	547077	550289	552257	559102	556207	552272	552781	557200	564788	550018	552715	556180	563294	570421	575504	574454	583715	591081	588397	590646	610691	607573	615594	630967	642342
jam	Jamaica	Middle SDI	FALSE	PM-equivalent emissions	132.007	134.679	152.381	159.813	155.745	166.547	172.455	179.382	187.828	191.494	195.968	196.059	194.58	198.687	188.718	191.853	209.027	202.071	181.851	132.96	124.187	131.82	122.09	149.431	144.192	148.501	149.249	145.727	149.235	145.855
jam	Jamaica	Middle SDI	FALSE	Fossil/industrial fraction	0.934937	0.937563	0.946207	0.950473	0.947147	0.952157	0.953013	0.953301	0.961714	0.962401	0.961626	0.965675	0.969114	0.969208	0.965344	0.965489	0.967524	0.965764	0.967066	0.944879	0.939071	0.933515	0.930049	0.942008	0.939097	0.940318	0.93992	0.93773	0.939654	0.938691
jam	Jamaica	Middle SDI	FALSE	Air pollution DALYs	39526.4	35717.9	35349.9	34989.6	34157.2	33084.1	31683.1	30672.4	29599.2	29329.8	28595.3	28327.3	26836.2	25765.2	24638.9	23409.5	23643	25815.4	28100.9	29172.8	26264.5	28019.8	26550.3	26942.7	29359.6	29872.7	29751.1	29542.1	29552.1	29733.6
jam	Jamaica	Middle SDI	FALSE	Air pollution deaths	1386.33	1230.14	1230.71	1248.97	1233.21	1198.97	1147.22	1120.8	1080.09	1085.29	1068.51	1075.51	1015.58	980.065	941.411	888.326	891.949	994.812	1085.74	1136	1008.82	1083.97	1009.5	1029.58	1136.87	1165.3	1152.68	1142.9	1146.67	1159.58
jam	Jamaica	Middle SDI	FALSE	All cause DALYs	598296	586490	600353	611613	621917	630918	643622	659682	672426	691984	692498	695889	676016	657502	648299	635814	642117	682122	723523	748771	698382	721716	690744	691287	724449	733569	739637	745788	752116	763646
jam	Jamaica	Middle SDI	FALSE	All cause deaths	12828.7	12192.8	12725.1	13387.9	13783.2	14009.7	14264.9	14763.1	15095.8	15793.4	15968.3	16208.5	15589.7	15119.3	14911.4	14443.5	14573.8	16196.1	17685.4	18669	16822.6	17780.5	16597.4	16771.2	18179.4	18596.3	18691.2	18903.1	19183.7	19657.7
jpn	Japan	High SDI	TRUE	PM-equivalent emissions	5153.79	5142.41	4766.28	4733.33	4722.34	4654.87	4434.8	4385.11	4242.02	4197.37	4228.85	4085.9	4080.37	4083.3	3990.46	3958.81	3862.66	3748.21	3441.32	3138.48	3285.48	3198.48	3124.32	3009.02	2826.08	2730.49	2692.74	2621.82	2546.65	2496.01
jpn	Japan	High SDI	TRUE	Fossil/industrial fraction	0.986345	0.986543	0.985609	0.986144	0.986027	0.985906	0.982135	0.981034	0.981736	0.981154	0.980328	0.980567	0.973583	0.973455	0.971326	0.970243	0.968612	0.965137	0.963738	0.96113	0.957257	0.955657	0.955072	0.952285	0.951382	0.949896	0.947971	0.943411	0.941298	0.93966
jpn	Japan	High SDI	TRUE	Air pollution DALYs	716505	714494	716585	718798	710975	718802	708242	708647	724988	737337	729837	720670	709417	704244	693310	693812	681560	673930	667668	660908	662606	679585	705640	742170	770164	782177	785860	783177	794093	802934
jpn	Japan	High SDI	TRUE	Air pollution deaths	31555.6	31613.9	31852.3	32133.5	31838.7	32332.2	31651.5	31606.1	32358	33062	32717.5	32399.5	32152.8	32315.3	32220.8	32747.7	32409.7	32290	32251.6	32020.8	32373.4	33568.6	35180.1	37334.6	38943.8	39832.9	40361.6	40585.8	41757.3	42565.2
jpn	Japan	High SDI	TRUE	All cause DALYs	3.08188e+07	3.11352e+07	3.15472e+07	3.18669e+07	3.19643e+07	3.25228e+07	3.24026e+07	3.26341e+07	3.32629e+07	3.36974e+07	3.36402e+07	3.36704e+07	3.38018e+07	3.41662e+07	3.43964e+07	3.48298e+07	3.48836e+07	3.50614e+07	3.52407e+07	3.5369e+07	3.56962e+07	3.63656e+07	3.60609e+07	3.60993e+07	3.60962e+07	3.60602e+07	3.6178e+07	3.61742e+07	3.64219e+07	3.65783e+07
jpn	Japan	High SDI	TRUE	All cause deaths	811198	829095	851495	869732	877554	907502	901567	912979	942790	968249	968987	975695	990752	1.01781e+06	1.04068e+06	1.07825e+06	1.09435e+06	1.11747e+06	1.14138e+06	1.16004e+06	1.1955e+06	1.25004e+06	1.25042e+06	1.2652e+06	1.27526e+06	1.29018e+06	1.31319e+06	1.32919e+06	1.36599e+06	1.40001e+06
jor	Jordan	Middle SDI	FALSE	PM-equivalent emissions	125.159	129.796	145.773	148.345	151.916	166.692	165.952	169.199	180.114	180.287	190.068	182.731	193.868	186.879	171.567	179.779	161.854	152.623	141.324	125.28	150.611	192.245	225.338	217.82	252.201	208.591	164.099	173.745	170.874	175.548
jor	Jordan	Middle SDI	FALSE	Fossil/industrial fraction	0.993545	0.992866	0.992728	0.991833	0.991199	0.991145	0.990522	0.990122	0.990267	0.989864	0.989886	0.988886	0.988867	0.987673	0.985602	0.985245	0.982622	0.980647	0.978209	0.974465	0.978014	0.982199	0.984333	0.983111	0.984754	0.981258	0.974472	0.974901	0.974788	0.975821
jor	Jordan	Middle SDI	FALSE	Air pollution DALYs	54086	56162.7	57572.9	60164.4	61344	62440.2	63110.9	62533.7	62062.4	61430.3	60701	61586	62988.3	64071.5	67069.2	70523.2	73042.1	73259.8	73435.3	74657	75768	77970.7	80710.3	83569.3	88091.1	92234.4	96392.1	99540.5	103008	107365
jor	Jordan	Middle SDI	FALSE	Air pollution deaths	1341.92	1399.27	1442.26	1536.76	1587.16	1640.26	1678.92	1678.6	1678.56	1678.63	1660.88	1709.59	1761.78	1778.12	1875.92	1990.93	2061.42	2017	1987.83	2023.77	2073.86	2150.01	2225.2	2301.57	2435.31	2567.25	2706.57	2822.21	2970.81	3131.3
jor	Jordan	Middle SDI	FALSE	All cause DALYs	1.02719e+06	1.04462e+06	1.05361e+06	1.07403e+06	1.08478e+06	1.09376e+06	1.10537e+06	1.10749e+06	1.10991e+06	1.11103e+06	1.11656e+06	1.12254e+06	1.12473e+06	1.13684e+06	1.17055e+06	1.22854e+06	1.25797e+06	1.27267e+06	1.29594e+06	1.32287e+06	1.35491e+06	1.40934e+06	1.48497e+06	1.56247e+06	1.6497e+06	1.73563e+06	1.84912e+06	1.95024e+06	2.0953e+06	2.13963e+06
jor	Jordan	Middle SDI	FALSE	All cause deaths	14968.8	15201.3	15302.9	15824.8	16083.3	16372.6	16697.6	16780.1	16890.3	16981.3	16997	17269.5	17368.7	17339.9	17894	18765.6	19095.8	18760.5	18715.5	19032.7	19602.1	20417.9	21302.5	22156.9	23468.5	24836.5	26734.6	28469.3	31192.9	32264.9
kaz	Kazakhstan	High-middle SDI	TRUE	PM-equivalent emissions	4441.97	4529.76	4183.18	3791.47	3541.39	3036.5	3015.63	2876.26	2945.23	2816	2785.19	2964.46	3034.01	3135.07	3239.34	3315.5	3396.61	3040.33	2722.71	2117.35	1914.97	1938.17	2012.7	2051.83	1858.51	1975.49	1982.09	1971.01	2131.1	2129.75
kaz	Kazakhstan	High-middle SDI	TRUE	Fossil/industrial fraction	0.950331	0.951477	0.942622	0.936996	0.933142	0.923655	0.924819	0.910517	0.911403	0.90501	0.902726	0.906905	0.916403	0.917581	0.921085	0.920341	0.923858	0.924759	0.92334	0.907417	0.900299	0.901139	0.904748	0.906249	0.896685	0.90271	0.90343	0.90295	0.910305	0.910286
kaz	Kazakhstan	High-middle SDI	TRUE	Air pollution DALYs	486507	492654	507113	537806	557813	573900	562394	535044	503855	479480	473083	464579	458406	456650	444180	439979	430426	417002	391466	371306	366753	361184	355664	346053	336320	332216	325527	318416	318894	317954
kaz	Kazakhstan	High-middle SDI	TRUE	Air pollution deaths	15506.3	16053.4	16799.5	18157.1	19050.7	19616.7	19190.4	18281.8	17289.4	16506.2	16251.7	15935.8	15804.7	15819.7	15336.2	15184.8	14890.4	14548.8	13814.6	13186.5	13102	13040.5	12952.7	12686.5	12413.7	12380.4	12286.3	12170.6	12115.2	12038.9
kaz	Kazakhstan	High-middle SDI	TRUE	All cause DALYs	6.08639e+06	6.17067e+06	6.34224e+06	6.57568e+06	6.74857e+06	6.93962e+06	6.91156e+06	6.77318e+06	6.59722e+06	6.48576e+06	6.55929e+06	6.59293e+06	6.63165e+06	6.74295e+06	6.84156e+06	6.95165e+06	6.98501e+06	6.90547e+06	6.65513e+06	6.43502e+06	6.41423e+06	6.33415e+06	6.2514e+06	6.06935e+06	5.918e+06	5.82395e+06	5.75055e+06	5.6854e+06	5.74006e+06	5.77956e+06
kaz	Kazakhstan	High-middle SDI	TRUE	All cause deaths	130182	135007	142037	152463	160056	166268	165496	161415	156662	153494	154997	155971	158104	161972	163367	165903	166559	164795	158717	152971	153138	152138	150596	145800	142112	140269	139506	138285	139408	139467
ken	Kenya	Low-middle SDI	FALSE	PM-equivalent emissions	348.395	348.598	356.81	370.184	374.178	375.246	386.666	388.011	403.041	418.459	434.605	434.995	429.523	426.901	450.564	457.943	477.24	516.435	532.263	555.945	564.787	581.174	567.315	595.306	598.021	592.429	623.059	631.468	640.918	646.566
ken	Kenya	Low-middle SDI	FALSE	Fossil/industrial fraction	0.51121	0.498545	0.492873	0.485717	0.478574	0.456876	0.464172	0.456557	0.46407	0.476292	0.48439	0.478645	0.463488	0.46055	0.479791	0.487231	0.498055	0.522988	0.529269	0.537001	0.533529	0.536662	0.515316	0.52877	0.521984	0.506882	0.520706	0.516653	0.523838	0.528054
ken	Kenya	Low-middle SDI	FALSE	Air pollution DALYs	1.46015e+06	1.43367e+06	1.41868e+06	1.40509e+06	1.39309e+06	1.38382e+06	1.37832e+06	1.38328e+06	1.38839e+06	1.38797e+06	1.41175e+06	1.40166e+06	1.41528e+06	1.43756e+06	1.4483e+06	1.46471e+06	1.47736e+06	1.48523e+06	1.4771e+06	1.47875e+06	1.49047e+06	1.48427e+06	1.45901e+06	1.43599e+06	1.41137e+06	1.37529e+06	1.33505e+06	1.30367e+06	1.27651e+06	1.258e+06
ken	Kenya	Low-middle SDI	FALSE	Air pollution deaths	23113.3	22984.1	22994.2	22992	22998.8	23040.8	23149.7	23458.6	23811.7	24048.8	24704.8	24905.4	25544.2	26228.9	26785.9	27311.5	27750.7	28087.7	28213.3	28467.8	28818.2	28986.1	28900.4	28777.7	28648.3	28413.4	28066.3	27829.1	27762.5	27739
ken	Kenya	Low-middle SDI	FALSE	All cause DALYs	1.38458e+07	1.45735e+07	1.54584e+07	1.63508e+07	1.73066e+07	1.8086e+07	1.88799e+07	1.97093e+07	2.03467e+07	2.08037e+07	2.10897e+07	2.13267e+07	2.15544e+07	2.17205e+07	2.16647e+07	2.14079e+07	2.10171e+07	2.05007e+07	2.01522e+07	1.96845e+07	1.93306e+07	1.90377e+07	1.88058e+07	1.86837e+07	1.85214e+07	1.82588e+07	1.79652e+07	1.77719e+07	1.76576e+07	1.76805e+07
ken	Kenya	Low-middle SDI	FALSE	All cause deaths	193096	205233	220139	235689	252359	266699	281466	296922	309751	319372	326951	333101	339406	344693	345346	341759	335259	327194	322182	315174	309934	305750	302665	301699	300179	296844	292878	291116	291385	293888
kir	Kiribati	Low SDI	FALSE	PM-equivalent emissions	0.701066	0.70292	0.722456	0.729761	0.685451	0.688696	0.833928	0.791183	0.852201	0.836104	0.91305	0.945216	1.09379	1.0871	1.14313	1.32052	1.35418	1.15712	1.17663	1.13277	1.2741	1.40977	1.45877	1.31527	1.33572	1.40896	1.39924	1.42761	1.44963	1.48905
kir	Kiribati	Low SDI	FALSE	Fossil/industrial fraction	0.570758	0.566302	0.576027	0.577927	0.547948	0.545748	0.581115	0.550568	0.575283	0.557617	0.590297	0.599685	0.651537	0.648012	0.663587	0.706194	0.710472	0.655371	0.655937	0.635306	0.671569	0.720285	0.732691	0.706814	0.712081	0.73209	0.736358	0.744294	0.752666	0.763428
kir	Kiribati	Low SDI	FALSE	Air pollution DALYs	5604.31	5660.59	5690.73	5696.76	5618.24	5562.32	5579.2	5630.33	5668.85	5752.1	5775.48	5784.1	5775.74	5774.65	5761.86	5760.41	5794.9	5853.32	5905.17	5932.95	5949.9	5958.39	5938.31	5907.53	5870.16	5839.64	5810.45	5767.19	5746.84	5700.72
kir	Kiribati	Low SDI	FALSE	Air pollution deaths	133.33	135.258	136.573	137.442	136.098	135.322	136.291	138.137	139.644	141.834	142.626	143.09	143.271	143.651	143.782	144.109	145.572	147.47	149.574	150.931	151.871	152.731	153.117	153.092	152.713	152.535	152.55	152.245	152.557	152.054
kir	Kiribati	Low SDI	FALSE	All cause DALYs	51123.1	51641	51704.4	51572.4	51117.1	50923	50517.1	50683.5	50803.3	51111.4	51316.5	51521.8	51701.8	51947.2	52297.3	52616.3	53124.5	53597.5	54136.8	54634.6	55048.5	55429.7	55700.1	55844.9	56041.7	56184.4	56378.2	56519.9	61076	56906.9
kir	Kiribati	Low SDI	FALSE	All cause deaths	933.374	946.582	952.553	955.366	949.469	947.994	945.665	953.495	959.865	969.815	975.831	981.739	987.542	994.072	1001.94	1009.29	1020.72	1032.56	1046.13	1058.72	1069	1079.97	1090.46	1098.75	1107.4	1114.43	1123.53	1132.24	1221.75	1151.03
kwt	Kuwait	High-middle SDI	TRUE	PM-equivalent emissions	286.79	268.67	242.301	208.249	277.804	270.699	249.884	276.537	372.94	462.978	478.952	540.703	607.936	603.41	624.924	709.195	719.86	738.794	753.623	798.917	684.031	688.189	610.986	747.903	667.608	762.209	749.902	679.287	668.726	655.306
kwt	Kuwait	High-middle SDI	TRUE	Fossil/industrial fraction	0.999415	0.999429	0.999385	0.999335	0.999501	0.999395	0.999409	0.999446	0.999579	0.999644	0.999644	0.999677	0.999702	0.999695	0.999696	0.999718	0.999734	0.999737	0.999728	0.999731	0.999675	0.99966	0.9996	0.999661	0.999607	0.999653	0.999645	0.999607	0.999609	0.999615
kwt	Kuwait	High-middle SDI	TRUE	Air pollution DALYs	22920.6	19245.2	18542.9	18557	20180.6	20997.5	20835.7	23796.8	23328.9	26072.3	26577.2	24660	27280.7	28088.4	29762.6	32123	34204.4	35431.8	40512.4	40393.9	37950.3	37642.5	39999.3	41403.4	42810.8	45757.1	47563.5	49724.3	52246.7	55183.9
kwt	Kuwait	High-middle SDI	TRUE	Air pollution deaths	566.5	485.822	455.005	470.726	516.909	559.302	561.595	650.956	642.203	730.893	741.761	692.615	773.224	796.818	852.741	923.811	989.573	1026.18	1190.51	1167.86	1076.71	1063.04	1130.62	1159.97	1187.07	1257.46	1331.13	1398.76	1468.76	1543.11
kwt	Kuwait	High-middle SDI	TRUE	All cause DALYs	405736	408003	297908	291369	304304	306862	310203	334804	328341	346316	353671	345200	367958	379329	398024	418626	441865	460264	499944	517784	513110	524121	550909	574117	600611	637104	660951	692424	725366	759566
kwt	Kuwait	High-middle SDI	TRUE	All cause deaths	5334.36	6096.5	3522.64	3585.47	3929.04	4128.23	4147.12	4674.48	4557.07	5002.86	5098.47	4852.84	5329.37	5450.04	5758.96	6084.64	6430.75	6626.86	7499.84	7484.35	6936.11	6869.01	7227.43	7405.67	7626.58	8080.26	8502.59	8977.18	9480.71	10012.9
kgz	Kyrgyzstan	Low-middle SDI	FALSE	PM-equivalent emissions	249.793	242.955	191.897	164.295	133.399	107.262	125.546	126.756	127.256	121.947	111.226	99.803	109.298	120.716	120.434	125.862	126.763	135.917	144.063	137.735	140.026	149.189	217.41	171.388	157.109	154.166	162.257	153.189	161.76	181.1
kgz	Kyrgyzstan	Low-middle SDI	FALSE	Fossil/industrial fraction	0.84351	0.836308	0.78801	0.751317	0.693692	0.61945	0.67436	0.673727	0.672557	0.654534	0.615874	0.567603	0.605356	0.641769	0.638494	0.65235	0.65209	0.675168	0.690508	0.673119	0.675033	0.691632	0.785897	0.725826	0.697309	0.688413	0.716838	0.701743	0.719828	0.750939
kgz	Kyrgyzstan	Low-middle SDI	FALSE	Air pollution DALYs	215066	210056	206233	210519	216128	213329	203482	196316	190315	183870	184951	181848	180643	179757	173660	172692	174129	170225	161096	151080	145478	141492	138515	135769	132411	129593	120850	117686	116821	117790
kgz	Kyrgyzstan	Low-middle SDI	FALSE	Air pollution deaths	5745.48	5754.3	5804.46	6113.71	6427.35	6393.93	6117.78	5980.96	5915.82	5808.39	6160.78	6192.28	6188.94	6194.07	5959.67	5927.14	5966.92	5834.36	5595.09	5236.22	5007.2	4859.56	4729.98	4582.85	4503.92	4517.2	4267.74	4201.92	4125.31	4159.28
kgz	Kyrgyzstan	Low-middle SDI	FALSE	All cause DALYs	1.81669e+06	1.81015e+06	1.80454e+06	1.83462e+06	1.88955e+06	1.8757e+06	1.82436e+06	1.78904e+06	1.76116e+06	1.73261e+06	1.75678e+06	1.74723e+06	1.75923e+06	1.776e+06	1.76457e+06	1.78818e+06	1.82865e+06	1.82118e+06	1.78377e+06	1.73307e+06	1.7431e+06	1.70428e+06	1.69597e+06	1.69506e+06	1.69017e+06	1.67835e+06	1.62259e+06	1.61894e+06	1.63187e+06	1.65102e+06
kgz	Kyrgyzstan	Low-middle SDI	FALSE	All cause deaths	34671.7	35122	35727.2	37515.9	39578.1	39375.4	37950.5	37255.9	36975.3	36475.8	38724.6	39185	39475.8	39929.3	39224	39679	40617.4	40157	39258.8	37580.7	37233.6	36282.8	35754.7	35250	35240.3	35598.6	34266.8	34331.9	34258	34676.3
lao	Lao People's Democratic Republic	Low-middle SDI	FALSE	PM-equivalent emissions	439.98	433.81	420.456	462.93	474.436	474.094	447.496	433.415	414.523	417.189	428.562	423.721	436.131	373.084	358.865	442.316	506.891	520.033	538.043	535.304	528.008	536.489	538.436	540.382	543.857	570.009	596.636	613.094	680.716	687.988
lao	Lao People's Democratic Republic	Low-middle SDI	FALSE	Fossil/industrial fraction	0.137312	0.143849	0.155823	0.144617	0.146632	0.15043	0.162474	0.172093	0.179266	0.179578	0.183798	0.20056	0.153456	0.186045	0.197248	0.295966	0.377336	0.378124	0.377124	0.386478	0.399193	0.411518	0.413945	0.416085	0.419465	0.446195	0.471386	0.485127	0.536361	0.541353
lao	Lao People's Democratic Republic	Low-middle SDI	FALSE	Air pollution DALYs	688488	680362	672847	665432	656330	647160	636907	625906	613584	599532	580311	562636	543985	521489	496795	474633	452968	430006	418705	399181	379167	361028	346094	332828	320725	312319	303990	296136	292284	289816
lao	Lao People's Democratic Republic	Low-middle SDI	FALSE	Air pollution deaths	11059.8	11031.1	11013.1	10997.5	10959.6	10924.1	10852.5	10777.7	10688.5	10573.9	10397.5	10256.8	10045.7	9818.89	9556	9335.74	9108.33	8856.05	8743.34	8525.09	8305.61	8097	7941.36	7813.12	7705.21	7669.91	7622.44	7606.24	7671.78	7765.7
lao	Lao People's Democratic Republic	Low-middle SDI	FALSE	All cause DALYs	3.92763e+06	3.88657e+06	3.87837e+06	3.86877e+06	3.85983e+06	3.79578e+06	3.76225e+06	3.70943e+06	3.66192e+06	3.60104e+06	3.543e+06	3.46335e+06	3.36663e+06	3.27407e+06	3.17812e+06	3.09826e+06	3.02913e+06	2.94237e+06	2.86264e+06	2.78227e+06	2.70224e+06	2.63181e+06	2.56998e+06	2.53167e+06	2.47636e+06	2.44657e+06	2.42173e+06	2.40092e+06	2.39139e+06	2.37482e+06
lao	Lao People's Democratic Republic	Low-middle SDI	FALSE	All cause deaths	58912.7	58547.2	58670.4	58713.6	58796.6	58234.1	57951	57419.9	56966.7	56304.8	55734.5	54853.8	53552.8	52450	51314.4	50469.1	49735.5	48712.3	47825	46896.5	45984.1	45152.7	44524.2	44245	43739.1	43697.6	43678.8	43808.9	44183.5	44456.8
lva	Latvia	High SDI	FALSE	PM-equivalent emissions	219.952	199.352	174.607	167.238	165.377	140.56	142.861	125.924	112.184	102.654	84.6675	102.846	102.269	102.481	102.085	106.304	100.02	98.1109	95.2095	101.285	91.7507	85.6972	89.8497	88.902	88.4208	85.6013	89.5315	89.5339	85.8975	87.6617
lva	Latvia	High SDI	FALSE	Fossil/industrial fraction	0.84748	0.815777	0.798377	0.783248	0.778059	0.715254	0.709282	0.67106	0.640456	0.615608	0.565135	0.611634	0.613812	0.594117	0.581709	0.598591	0.580483	0.581547	0.59924	0.589745	0.61615	0.592311	0.579458	0.581118	0.572369	0.597197	0.597835	0.555083	0.542042	0.556798
lva	Latvia	High SDI	FALSE	Air pollution DALYs	73097.8	73530.1	75534.9	84603.6	90600.9	82303.8	68265	63030.5	63455.3	58141.1	55533.2	57755.1	56294.2	54405	53061.8	54493.7	56306.1	54602.2	49813.7	46967.7	45636.6	42833.1	39890.1	37469.1	33623.4	30346.8	26283.4	24320.9	24332.3	24510.5
lva	Latvia	High SDI	FALSE	Air pollution deaths	3214.66	3190.24	3237.79	3566.26	3774.98	3453.67	2919.46	2734.69	2757.29	2551.89	2441.74	2536.9	2476.43	2425.77	2372.25	2426.62	2515.39	2450.83	2275.16	2175.23	2132.43	2029.13	1908.43	1810.46	1628.43	1479.28	1298.16	1205.95	1216.81	1233.65
lva	Latvia	High SDI	FALSE	All cause DALYs	1.15026e+06	1.1686e+06	1.2024e+06	1.31061e+06	1.38524e+06	1.30076e+06	1.14613e+06	1.10219e+06	1.12606e+06	1.077e+06	1.04929e+06	1.07707e+06	1.05478e+06	1.03009e+06	1.01249e+06	1.03095e+06	1.05527e+06	1.02458e+06	958564	914838	894753	864106	847413	848619	825160	806546	780761	775889	772797	769038
lva	Latvia	High SDI	FALSE	All cause deaths	33377.4	33754.4	34854.7	38753.7	41523.5	38847.5	33786.5	32669.8	33833.1	32343.3	31498.2	32808.1	32277.5	31977.7	31602.2	32514	33840	33018.2	30979.3	29778.5	29442.9	28820.4	28566.6	29058.5	28326.9	27845.5	27187.5	27184.1	27354	27426.7
lbn	Lebanon	High-middle SDI	FALSE	PM-equivalent emissions	82.737	100.853	93.4691	117.77	130.648	145.095	155.319	173.587	179.865	177.348	166.402	178.302	174.208	162.634	165.931	161.613	145.189	141.694	162.486	183.393	187.384	194.697	206.363	220.454	226.71	234.382	243.915	271.481	268.064	273.942
lbn	Lebanon	High-middle SDI	FALSE	Fossil/industrial fraction	0.965546	0.969983	0.966338	0.972235	0.973673	0.975122	0.975847	0.977774	0.97723	0.976177	0.974163	0.974361	0.971553	0.966834	0.964978	0.961813	0.956095	0.954641	0.96145	0.968695	0.968137	0.968104	0.967226	0.968967	0.967431	0.968647	0.969979	0.973199	0.973525	0.975135
lbn	Lebanon	High-middle SDI	FALSE	Air pollution DALYs	66739.8	67051.9	67623.1	67980.6	67258.7	66192	65066.7	64097.6	63019.4	62092.4	61728.9	62071.2	62822.4	64224.9	65889.9	67843	70426.3	73761.4	77188.2	79887.2	81657.2	84051.9	86488	88399.2	89392.1	89749.4	88127.6	86586.3	86990.2	87694.5
lbn	Lebanon	High-middle SDI	FALSE	Air pollution deaths	2057.02	2083.52	2124.42	2161.29	2163.46	2159.91	2156.9	2159.78	2155.33	2154.43	2172.63	2217.44	2275.14	2356.56	2445.27	2542.28	2663.39	2819.21	2980.98	3110.86	3198.09	3293.71	3376.17	3438.16	3475.92	3492.8	3424.44	3355.79	3363.29	3381.8
lbn	Lebanon	High-middle SDI	FALSE	All cause DALYs	1.19997e+06	1.07229e+06	1.07016e+06	1.06202e+06	1.05104e+06	1.03664e+06	1.03433e+06	1.01936e+06	1.01339e+06	1.01033e+06	1.01061e+06	1.01024e+06	1.01798e+06	1.03289e+06	1.0465e+06	1.06772e+06	1.13539e+06	1.11045e+06	1.13549e+06	1.14034e+06	1.15748e+06	1.19242e+06	1.25012e+06	1.30131e+06	1.33003e+06	1.33648e+06	1.34408e+06	1.3565e+06	1.39486e+06	1.35106e+06
lbn	Lebanon	High-middle SDI	FALSE	All cause deaths	22494.7	20556.3	20718.9	20785.3	20723.1	20644.4	20822.1	20870.7	21060.9	21285.8	21623	22025.1	22575	23289.1	24031.9	24909.5	26545.1	26717.1	27667.4	28242.7	28925.4	29787.8	30748.2	31641.8	32362.6	32744.4	33089.9	33510.7	34340.5	33858.1
lso	Lesotho	Low-middle SDI	FALSE	PM-equivalent emissions	25.8846	25.3337	24.9914	25.0585	27.2776	28.2493	28.1598	27.3036	27.8266	29.0874	28.3724	28.509	28.1863	27.5758	27.5713	39.7796	40.0833	40.6942	43.8943	43.9233	46.2763	40.2072	40.9566	43.4421	43.1344	43.2116	43.7839	44.4682	43.8656	42.6903
lso	Lesotho	Low-middle SDI	FALSE	Fossil/industrial fraction	0.180709	0.183857	0.199375	0.202077	0.181894	0.175627	0.169959	0.174096	0.162982	0.20048	0.203691	0.204233	0.194121	0.195402	0.196435	0.439816	0.445035	0.452962	0.497954	0.495829	0.525369	0.451334	0.467814	0.502655	0.508417	0.509828	0.514694	0.517778	0.51145	0.498283
lso	Lesotho	Low-middle SDI	FALSE	Air pollution DALYs	118709	118107	117358	116486	115612	113975	112453	111769	112355	113375	116004	117036	118485	120275	122014	123157	123725	124951	126148	123400	121903	121497	120503	118166	116008	113336	108382	104254	101359	99256.3
lso	Lesotho	Low-middle SDI	FALSE	Air pollution deaths	2444.58	2436.66	2436.15	2431.71	2436.76	2424.78	2408.2	2407.87	2458.23	2512.47	2612.21	2649.88	2710.23	2784.24	2843.5	2883.51	2902.09	2918.74	2940.98	2899.86	2892.66	2887.89	2894.61	2883.2	2852.65	2797.69	2692.87	2601.04	2540.85	2499.45
lso	Lesotho	Low-middle SDI	FALSE	All cause DALYs	1.06282e+06	1.0789e+06	1.10685e+06	1.14545e+06	1.19994e+06	1.26145e+06	1.33626e+06	1.42904e+06	1.54952e+06	1.66273e+06	1.77967e+06	1.86386e+06	1.9548e+06	2.04324e+06	2.11353e+06	2.13547e+06	2.10575e+06	2.0279e+06	1.92882e+06	1.84552e+06	1.79753e+06	1.80591e+06	1.84226e+06	1.86142e+06	1.87116e+06	1.84072e+06	1.76162e+06	1.68974e+06	1.65645e+06	1.64769e+06
lso	Lesotho	Low-middle SDI	FALSE	All cause deaths	17787.7	18097.8	18675.9	19439	20540.1	21763.1	23239.6	25109.2	27643.3	30082.7	32711.4	34546.5	36587.4	38647.5	40244.7	40818.5	40268.5	38613.2	36719.8	35356.7	34627.8	34769.5	35635.9	36222.9	36551	36051.5	34533.2	33132	32561.9	32513.8
lbr	Liberia	Low SDI	FALSE	PM-equivalent emissions	60.8443	57.7086	54.7663	63.6958	68.4895	70.5775	72.8844	71.128	72.0081	72.2107	70.0759	70.4483	71.001	60.0998	62.5394	61.3213	60.4145	63.83	65.7247	68.1682	73.1988	75.2669	76.0614	77.5793	78.434	79.3767	80.4268	81.6241	82.2535	82.7861
lbr	Liberia	Low SDI	FALSE	Fossil/industrial fraction	0.13892	0.110792	0.112294	0.0989358	0.0927422	0.0925951	0.0947028	0.102025	0.110346	0.117127	0.125794	0.141247	0.14008	0.171991	0.174269	0.194858	0.216336	0.200554	0.190884	0.184177	0.199739	0.207087	0.208771	0.221366	0.230931	0.235665	0.239171	0.240951	0.247051	0.252163
lbr	Liberia	Low SDI	FALSE	Air pollution DALYs	297974	289977	285700	275587	267057	266763	279603	280720	280525	275048	264742	247895	227424	212919	202389	200174	196720	191611	187856	189797	191018	188674	188892	184575	177120	172074	167063	159754	156754	156033
lbr	Liberia	Low SDI	FALSE	Air pollution deaths	4654.75	4606.99	4592.17	4506.61	4441.51	4448.58	4642.88	4647.28	4644.92	4562.02	4453.85	4235.63	4003.12	3817.66	3694.69	3677.12	3678.37	3636.86	3624.86	3675.09	3715.12	3703.01	3733.55	3689.27	3565.7	3513.04	3442.01	3357.12	3355.75	3376.06
lbr	Liberia	Low SDI	FALSE	All cause DALYs	2.77584e+06	2.53683e+06	2.51848e+06	2.63419e+06	2.74153e+06	2.68996e+06	2.86856e+06	2.76466e+06	2.82401e+06	2.85464e+06	2.81499e+06	2.73765e+06	2.71616e+06	2.67568e+06	2.38061e+06	2.3313e+06	2.30089e+06	2.27101e+06	2.25175e+06	2.2607e+06	2.28401e+06	2.27016e+06	2.23026e+06	2.19127e+06	2.52433e+06	2.27859e+06	2.10381e+06	2.04675e+06	2.00243e+06	1.97586e+06
lbr	Liberia	Low SDI	FALSE	All cause deaths	38524.3	35152.5	35095.4	37204.8	39110.5	38179.8	40812.9	38800.2	39493.9	39731.6	39164.3	38273.7	38477.9	38270	34098	33516.5	33191	32916.7	32779.3	32899.3	33136.8	32976.1	32480.6	32010	38454.1	34090.3	31090.5	30443.2	29982	29749.8
lby	Libya	High-middle SDI	FALSE	PM-equivalent emissions	248.232	250.644	250.58	266.73	314.619	349.432	382.765	379.927	383.547	387.465	390.922	388.565	393.842	411.657	390.637	426.262	415.185	375.449	395.606	432.233	450.924	289.028	401.941	373.385	363.836	302.545	291.963	297.818	310.534	320.594
lby	Libya	High-middle SDI	FALSE	Fossil/industrial fraction	0.968982	0.968813	0.968583	0.970265	0.97466	0.97708	0.97887	0.978621	0.978721	0.978795	0.978713	0.978154	0.978053	0.978552	0.976872	0.978278	0.977432	0.974853	0.975994	0.978151	0.979368	0.968666	0.978021	0.977099	0.977273	0.972849	0.972099	0.972824	0.97409	0.975049
lby	Libya	High-middle SDI	FALSE	Air pollution DALYs	82784.2	79659	76255.2	73544.7	71069.8	68710.8	66439.8	66841.9	67612.9	68467	69160.2	69926.5	71293.4	71407.7	69983.4	70682.9	72553.7	80082.8	82277.8	86236.9	85875.9	87532.4	87117.7	88179.8	90311.2	92765.6	95779.8	99168.6	103652	108846
lby	Libya	High-middle SDI	FALSE	Air pollution deaths	1932.53	1894.03	1839.93	1811.94	1785.21	1756.91	1730.82	1783.11	1858.74	1916.83	1955.65	2005.58	2072.33	2077.69	2015.86	2044	2113.54	2380.69	2471.78	2620.06	2604.79	2665.21	2664.81	2713.94	2796.14	2880.29	2982.01	3101.41	3264.03	3444.82
lby	Libya	High-middle SDI	FALSE	All cause DALYs	1.34775e+06	1.31376e+06	1.28782e+06	1.24742e+06	1.22129e+06	1.19652e+06	1.33758e+06	1.17862e+06	1.1791e+06	1.18521e+06	1.20118e+06	1.20718e+06	1.22638e+06	1.22458e+06	1.20837e+06	1.20553e+06	1.22163e+06	1.28252e+06	1.32966e+06	1.3668e+06	1.3653e+06	1.82072e+06	1.42294e+06	1.43413e+06	1.77535e+06	1.75439e+06	1.82757e+06	1.68013e+06	1.70665e+06	1.70725e+06
lby	Libya	High-middle SDI	FALSE	All cause deaths	19735.7	19338.9	19012.8	18527.6	18253.8	17963.8	20176.3	18014.6	18407.7	18703.2	19058.6	19298.1	19768	19570.5	18894.8	18800.9	19134.7	20932.2	21950.3	22998	22810.9	30225.8	23870.4	24323.1	30434.9	30723.1	32276.5	30262.5	31208.5	31659.7
ltu	Lithuania	High SDI	FALSE	PM-equivalent emissions	362.897	386.578	231.7	202.487	193.979	171.515	176.191	161.194	170.773	143.793	116.853	124.579	122.358	114.133	117.937	122.448	125.321	111.633	118.802	117.555	119.667	115.9	123.549	113.922	105.381	116.441	123.037	120.985	121.116	119.087
ltu	Lithuania	High SDI	FALSE	Fossil/industrial fraction	0.953394	0.960132	0.939545	0.905109	0.900398	0.885354	0.880454	0.865144	0.862195	0.830429	0.776193	0.777457	0.7658	0.739955	0.73813	0.751684	0.74712	0.723521	0.72899	0.715789	0.726029	0.726421	0.725954	0.692949	0.653955	0.655966	0.669558	0.653779	0.658182	0.656317
ltu	Lithuania	High SDI	FALSE	Air pollution DALYs	69384.7	72692.1	71378.3	77856.5	78560.5	74430	66513.7	59645.2	56694.4	52868.8	50739.9	52404.2	51381.4	51283.9	51044.3	54066.1	55642.2	57150.2	54367	49390.7	49166.3	47502.5	44767.9	42293.2	37743.3	35396.8	31129.6	26380.8	26314.8	26269.2
ltu	Lithuania	High SDI	FALSE	Air pollution deaths	3032.62	3138.91	3059.78	3322.51	3336.47	3174.14	2882.14	2626.11	2519.4	2361.98	2267.01	2345.45	2303.8	2300.48	2282.09	2414.91	2486.84	2557.11	2479.98	2296.17	2312.56	2252	2138.82	2036.81	1832.11	1731.85	1532.11	1324.22	1334.87	1340.27
ltu	Lithuania	High SDI	FALSE	All cause DALYs	1.39487e+06	1.46567e+06	1.47317e+06	1.58071e+06	1.61986e+06	1.58062e+06	1.48683e+06	1.41636e+06	1.40325e+06	1.37385e+06	1.35271e+06	1.39356e+06	1.37425e+06	1.37691e+06	1.37745e+06	1.43342e+06	1.45823e+06	1.48279e+06	1.41889e+06	1.30633e+06	1.2921e+06	1.26247e+06	1.24153e+06	1.23779e+06	1.1988e+06	1.19747e+06	1.17899e+06	1.11377e+06	1.10657e+06	1.09563e+06
ltu	Lithuania	High SDI	FALSE	All cause deaths	38732.9	40796.8	40790.2	44881.4	46253.2	45156.6	42412.9	40394.7	40348.3	39421.3	38776	40622.3	40307.1	40790.3	41022.8	43484.8	44710.5	45929	44489.8	41059.1	41353.5	40813.3	40557.8	41066.5	39999.4	40706.4	40536	38528.6	38683.4	38501.4
lux	Luxembourg	High SDI	FALSE	PM-equivalent emissions	44.3625	48.2811	48.0521	48.23	45.4514	36.5914	35.777	33.5101	30.6076	32.5375	35.1185	36.9006	36.0654	37.4174	42.7489	43.413	39.4238	35.8307	32.6314	29.2579	29.3348	28.4209	26.5608	24.5857	23.6919	22.017	20.8226	20.2767	19.6618	19.5015
lux	Luxembourg	High SDI	FALSE	Fossil/industrial fraction	0.991267	0.992053	0.991411	0.991345	0.990745	0.988399	0.988727	0.987633	0.985795	0.986041	0.986489	0.984089	0.983684	0.984646	0.985069	0.979726	0.976871	0.973339	0.969389	0.967387	0.964825	0.963841	0.96161	0.962285	0.95189	0.949012	0.942679	0.939227	0.938289	0.938688
lux	Luxembourg	High SDI	FALSE	Air pollution DALYs	4576.14	4456.82	4288.26	4164.81	4014.12	3898.01	3780.29	3589.95	3440.36	3261.75	3171.1	3032.53	3038.55	2977.95	2962.66	2907.88	2892.29	2860.62	2846.57	2910.62	2935.58	2876.39	2751.97	2587.05	2423.22	2263.34	2113.62	2081.49	2175.6	2317.2
lux	Luxembourg	High SDI	FALSE	Air pollution deaths	216.385	210.969	203.61	198.568	191.629	185.897	179.831	170.954	163.753	155.115	150.819	143.468	144.533	141.174	140.11	137.36	136.219	134.837	133.364	136.424	137.684	134.271	127.825	119.475	111.033	102.393	94.5152	92.6704	96.9076	102.5
lux	Luxembourg	High SDI	FALSE	All cause DALYs	128043	128241	127812	128156	127476	127454	127701	126914	126662	126500	127065	126201	126653	126346	126909	127233	127995	127749	127838	129232	130619	132122	133940	135906	137722	139569	140870	144503	148227	152231
lux	Luxembourg	High SDI	FALSE	All cause deaths	3830.11	3829.99	3805.59	3808.17	3768.53	3758.66	3751.94	3723.72	3713.35	3698.11	3714.37	3655.66	3664.47	3635.6	3655.78	3663.87	3678.54	3658.14	3635.3	3672.47	3712.05	3736.58	3773.43	3813.92	3821.87	3823.45	3807.55	3918.42	4025.66	4147.24
mdg	Madagascar	Low SDI	FALSE	PM-equivalent emissions	520.774	518.171	518.777	522.891	537.157	535.284	562.264	554.234	560.518	553.529	560.142	557.028	557.313	552.037	567.268	598.044	581.112	589.577	595.214	603.482	599.837	610.407	609.764	612.648	615.641	620.545	626.559	633.664	636.454	638.46
mdg	Madagascar	Low SDI	FALSE	Fossil/industrial fraction	0.10967	0.114049	0.114844	0.117518	0.11731	0.1198	0.117375	0.122943	0.124582	0.127189	0.126799	0.122228	0.11441	0.123859	0.126873	0.132106	0.136481	0.138268	0.135626	0.132928	0.140812	0.148272	0.151305	0.153317	0.158982	0.161378	0.164393	0.166565	0.170443	0.173257
mdg	Madagascar	Low SDI	FALSE	Air pollution DALYs	1.29041e+06	1.30345e+06	1.31594e+06	1.33843e+06	1.33272e+06	1.32226e+06	1.32177e+06	1.31936e+06	1.31714e+06	1.30697e+06	1.29184e+06	1.26706e+06	1.25879e+06	1.24352e+06	1.22688e+06	1.23148e+06	1.22564e+06	1.22864e+06	1.24782e+06	1.25765e+06	1.24606e+06	1.24431e+06	1.2251e+06	1.20435e+06	1.19657e+06	1.18298e+06	1.16563e+06	1.15024e+06	1.14021e+06	1.13119e+06
mdg	Madagascar	Low SDI	FALSE	Air pollution deaths	21343.2	21605.3	21845	22424.8	22198.8	22707	22823	22887.9	23006.5	22820.5	22660.6	22360	22428.8	22380.6	22228.3	22280.9	22253.8	22357	22840.9	23185.2	23243.6	23400.7	23327.4	23236.8	23285.3	23310	23321.7	23384.2	23590.1	23748
mdg	Madagascar	Low SDI	FALSE	All cause DALYs	1.06742e+07	1.07264e+07	1.07801e+07	1.09126e+07	1.08859e+07	1.05772e+07	1.06233e+07	1.06724e+07	1.06861e+07	1.07008e+07	1.06506e+07	1.06359e+07	1.07386e+07	1.07381e+07	1.07652e+07	1.07163e+07	1.07224e+07	1.07434e+07	1.07914e+07	1.08719e+07	1.09184e+07	1.09126e+07	1.0906e+07	1.09004e+07	1.08817e+07	1.08397e+07	1.08055e+07	1.07689e+07	1.07552e+07	1.07258e+07
mdg	Madagascar	Low SDI	FALSE	All cause deaths	150201	150772	151333	153960	152428	150782	151535	152401	152971	152586	151943	151590	153695	154260	154778	153829	153850	154289	155587	157424	158719	159224	159843	160498	161052	161351	161821	162522	163512	164161
mwi	Malawi	Low SDI	FALSE	PM-equivalent emissions	182.596	180.653	177.216	174.366	181.65	184.798	186.08	182.667	186.81	191.117	190.766	192.473	199.683	202.329	206.631	214.973	219.287	222.381	225.883	228.962	233.234	235.408	236.443	238.398	239.843	244.961	249.139	254.303	255.506	256.592
mwi	Malawi	Low SDI	FALSE	Fossil/industrial fraction	0.120324	0.126846	0.133945	0.141054	0.123073	0.128514	0.13434	0.137073	0.14266	0.159653	0.153331	0.149764	0.173079	0.175215	0.178678	0.175867	0.178329	0.16732	0.174888	0.175333	0.194706	0.189468	0.192783	0.197428	0.205452	0.214065	0.216547	0.218355	0.222488	0.226204
mwi	Malawi	Low SDI	FALSE	Air pollution DALYs	1.12932e+06	1.15132e+06	1.1716e+06	1.16722e+06	1.14818e+06	1.13431e+06	1.12484e+06	1.11922e+06	1.11664e+06	1.14527e+06	1.14406e+06	1.11636e+06	1.08653e+06	1.05953e+06	1.01822e+06	975005	944788	904306	865581	854281	847490	840685	818972	794511	772512	755241	736298	706534	698949	690971
mwi	Malawi	Low SDI	FALSE	Air pollution deaths	17025.6	17368.9	17713.8	17748.6	17672	17641.5	17658.3	17699	17810.4	18163.7	18143.6	17743.5	17407.9	17111.2	16681.1	16155.2	15812.6	15327.3	14901.4	14823.7	14834	14795.8	14585.8	14340.4	14135.5	14022.8	13891.9	13630.6	13671.6	13716.5
mwi	Malawi	Low SDI	FALSE	All cause DALYs	1.18146e+07	1.22871e+07	1.26364e+07	1.28382e+07	1.28274e+07	1.28299e+07	1.29224e+07	1.30362e+07	1.31849e+07	1.32666e+07	1.31561e+07	1.31013e+07	1.29284e+07	1.26306e+07	1.23738e+07	1.20214e+07	1.15785e+07	1.10561e+07	1.05025e+07	1.00149e+07	9.58165e+06	9.14593e+06	8.69884e+06	8.35838e+06	8.13487e+06	8.03081e+06	7.9532e+06	7.74448e+06	7.57655e+06	7.50452e+06
mwi	Malawi	Low SDI	FALSE	All cause deaths	159992	167349	173607	178638	181738	184463	188023	191638	195656	197956	197308	197039	195451	192330	189632	184718	177847	169485	160348	152377	145872	139256	132107	126765	123682	122622	121727	119145	117159	116671
mys	Malaysia	High-middle SDI	TRUE	PM-equivalent emissions	804.069	828.676	841.276	917.301	939.499	974.923	998.889	1040.85	1015.55	904.482	883.924	892.881	956.895	860.671	951.554	964.303	988.058	1088.42	1103.55	1051.72	1164.95	1249.62	1198.58	1234.23	1264.87	1238.52	1216.88	1259.02	1293.9	1298.46
mys	Malaysia	High-middle SDI	TRUE	Fossil/industrial fraction	0.790373	0.798767	0.787306	0.743543	0.743354	0.752814	0.800438	0.795737	0.784103	0.7762	0.758074	0.756412	0.788242	0.825713	0.832735	0.830045	0.831578	0.855884	0.861325	0.852933	0.871232	0.879573	0.876184	0.877069	0.883669	0.881419	0.87993	0.884435	0.88768	0.888208
mys	Malaysia	High-middle SDI	TRUE	Air pollution DALYs	249253	238774	233251	229362	227080	232244	227131	226817	223367	244919	230989	229510	232154	242311	245507	248891	250598	251618	259324	266375	265495	271138	278020	277590	293293	302769	296170	288639	298409	312254
mys	Malaysia	High-middle SDI	TRUE	Air pollution deaths	7886.42	7576.7	7428.68	7423.73	7617.35	7870.46	7618.3	7478.92	7339.2	8103.82	7724.06	7792.53	7958.83	8245.89	8261.52	8365.19	8434.8	8431.23	8676.8	8891	8881.83	9076.54	9303.1	9212.79	9748.48	10089.8	10043.9	9839.36	10303	10960.2
mys	Malaysia	High-middle SDI	TRUE	All cause DALYs	4.4417e+06	4.49964e+06	4.56593e+06	4.68042e+06	4.78697e+06	4.98454e+06	5.03276e+06	5.14412e+06	5.1796e+06	5.54337e+06	5.37561e+06	5.38323e+06	5.45668e+06	5.60998e+06	5.67366e+06	5.73148e+06	5.79643e+06	5.90046e+06	6.10313e+06	6.31295e+06	6.35128e+06	6.48234e+06	6.62017e+06	6.62131e+06	6.90119e+06	7.09241e+06	7.23471e+06	7.38913e+06	7.50882e+06	7.7401e+06
mys	Malaysia	High-middle SDI	TRUE	All cause deaths	82313.7	83334.8	85038.2	88579.7	93991.3	99563.2	98466.4	98576.8	98213.5	108573	104732	106168	108769	111527	111647	112844	114963	117477	123582	129585	131496	134906	137650	136416	144127	149487	156664	162265	166985	175876
mdv	Maldives	Middle SDI	FALSE	PM-equivalent emissions	3.93666	4.10825	5.33635	4.83123	4.68233	5.21613	5.60381	6.13892	6.17593	7.99784	8.75906	9.45545	11.2144	10.1771	12.2046	11.2627	13.9106	13.6618	14.8736	14.3523	13.5945	14.6382	14.7818	14.54	15.1712	16.8323	17.2717	18.1051	18.9404	20.1972
mdv	Maldives	Middle SDI	FALSE	Fossil/industrial fraction	0.584007	0.604714	0.699975	0.67212	0.665715	0.70357	0.702778	0.727674	0.727712	0.787606	0.805234	0.805394	0.832224	0.809851	0.837759	0.821681	0.846988	0.843298	0.85532	0.849467	0.840286	0.857727	0.859494	0.856856	0.861715	0.875551	0.879639	0.884123	0.889265	0.896184
mdv	Maldives	Middle SDI	FALSE	Air pollution DALYs	7685.71	7507.5	7260.4	6950.93	6571.05	6268.79	5998.23	5636	5138.87	4701.67	4420.38	4149.07	3747.64	3450.43	3185.35	3010.63	2896.69	2807.19	2743.31	2699.08	2661.97	2570.98	2452.31	2323.81	2227.32	2232.95	2360.56	2491.2	2541.1	2540.54
mdv	Maldives	Middle SDI	FALSE	Air pollution deaths	175.791	177.137	176.446	172.003	164.177	160.807	159.552	153.829	140.971	130.246	125.849	121.224	110.007	102.97	95.7885	91.0633	87.7932	85.4891	83.613	82.1236	81.046	78.5172	75.1437	71.2085	67.9567	68.4312	72.1635	76.8856	79.6753	80.5498
mdv	Maldives	Middle SDI	FALSE	All cause DALYs	99026.1	96196.1	93043.3	90025.9	87111.3	84316	81291.7	78262.3	75630.2	74516.4	72329.3	70800.9	68715.7	67182.6	73962.6	65761.2	65877.2	66260.7	67185	68597.9	70247.9	72187.8	73862.4	75952.3	78231.5	80609.1	83560.4	85986.1	88160.6	90837.8
mdv	Maldives	Middle SDI	FALSE	All cause deaths	1440.22	1421.16	1395.25	1358.18	1312.36	1286.4	1268.65	1237.18	1183.51	1160.33	1143.91	1139.37	1098.63	1081.02	1195.27	1059.26	1061.93	1067.61	1082.78	1107.25	1133.57	1161.48	1188.66	1221.41	1256.73	1292.75	1347	1397.59	1447.63	1501.8
mli	Mali	Low SDI	FALSE	PM-equivalent emissions	286.774	286.496	285.158	286.45	298.824	306.566	311.113	312.013	314.839	323.156	325.921	332.886	334.657	338.301	343.984	350.839	351.66	352.31	358.029	357.695	355.596	359.459	360.757	362.602	362.548	367.061	372.085	378.298	380.413	382.771
mli	Mali	Low SDI	FALSE	Fossil/industrial fraction	0.116743	0.11736	0.119093	0.12101	0.11788	0.11865	0.120794	0.126036	0.135721	0.137428	0.140261	0.141922	0.149633	0.153823	0.159007	0.162524	0.164763	0.172511	0.176686	0.182972	0.195631	0.196164	0.200461	0.202406	0.207247	0.211597	0.214635	0.21736	0.222033	0.227125
mli	Mali	Low SDI	FALSE	Air pollution DALYs	1.27613e+06	1.26891e+06	1.26612e+06	1.26267e+06	1.26775e+06	1.2799e+06	1.29802e+06	1.32282e+06	1.34368e+06	1.36018e+06	1.36708e+06	1.3512e+06	1.38217e+06	1.37763e+06	1.37397e+06	1.37829e+06	1.3924e+06	1.40255e+06	1.44521e+06	1.47441e+06	1.47955e+06	1.46703e+06	1.47871e+06	1.49677e+06	1.51864e+06	1.5554e+06	1.63207e+06	1.65834e+06	1.65269e+06	1.64642e+06
mli	Mali	Low SDI	FALSE	Air pollution deaths	18936.1	18872.1	18911.8	18926.3	19071.5	19300.7	19571.1	19884.7	20122.8	20314.9	20471.2	20329.6	20799.7	20798.4	20846.5	20984.2	21262.8	21510	22133.7	22608.8	22782.5	22722.7	22952.2	23266.3	23619.4	24251.8	25313.8	25771.8	25836.2	25871.8
mli	Mali	Low SDI	FALSE	All cause DALYs	1.20496e+07	1.19905e+07	1.19749e+07	1.19538e+07	1.20572e+07	1.21418e+07	1.22877e+07	1.27896e+07	1.30503e+07	1.2561e+07	1.26747e+07	1.27078e+07	1.27865e+07	1.28316e+07	1.28307e+07	1.29216e+07	1.30517e+07	1.31482e+07	1.32689e+07	1.33869e+07	1.34981e+07	1.35749e+07	1.37616e+07	1.41267e+07	1.42712e+07	1.44496e+07	1.45276e+07	1.46478e+07	1.4801e+07	1.48477e+07
mli	Mali	Low SDI	FALSE	All cause deaths	161213	160539	160647	160624	162462	163789	165774	173078	176882	169495	171186	171665	172838	173282	173152	174353	176126	177587	179307	181130	182706	183800	186534	191661	193725	196191	197151	198813	200926	201433
mlt	Malta	High SDI	FALSE	PM-equivalent emissions	31.4965	31.4856	33.3518	39.3238	36.1721	37.8073	38.8963	42.1851	40.2887	40.3347	103.182	113.931	110.852	134.632	122.166	86.4513	93.0102	100.511	102.015	112.026	152.565	141.163	121.389	119.424	121.935	146.638	170.192	200.544	198.592	201.149
mlt	Malta	High SDI	FALSE	Fossil/industrial fraction	0.998863	0.99886	0.998922	0.999085	0.999005	0.999048	0.999087	0.999146	0.999055	0.999	0.999586	0.999664	0.999679	0.999755	0.999738	0.999703	0.999723	0.999755	0.999709	0.999735	0.999838	0.99984	0.999829	0.999836	0.999816	0.999844	0.999871	0.999872	0.999872	0.999875
mlt	Malta	High SDI	FALSE	Air pollution DALYs	4204.29	4157.57	4135.91	4067.51	3996.11	3999.44	4016.67	4023.6	3922.63	3918.74	3861.65	3832.1	3822.77	3777.93	3711.1	3656.76	3665.32	3790.79	3954.12	4074.38	4137.46	4136.24	3977.1	3736.44	3501.24	3263.21	3142.09	3072.99	3168.28	3330.76
mlt	Malta	High SDI	FALSE	Air pollution deaths	189.237	188.321	188.101	185.81	182.247	183.029	184.054	185.316	181.892	183.649	181.505	180.267	180.892	178.662	174.527	170.571	170.958	176.838	184.435	190.748	194.095	194.902	187.943	177.086	166.003	153.825	148.766	146.052	152.385	161.805
mlt	Malta	High SDI	FALSE	All cause DALYs	98886.2	99243.2	99840.2	99706.7	99693.6	100759	101812	102790	103000	104147	104954	105802	107180	108144	108758	108970	109562	110716	111811	112588	113291	114706	115727	116374	117236	117277	119072	120364	121492	122931
mlt	Malta	High SDI	FALSE	All cause deaths	2702.43	2711.99	2730.83	2725.97	2712.46	2756.52	2801.54	2842.25	2852.78	2915.6	2956.12	2995.78	3054.47	3079.64	3074.24	3062.07	3070.95	3111.5	3153.21	3192.12	3222.29	3293.79	3348.77	3381.76	3427.22	3418.41	3518.62	3595.04	3675.01	3780.27
mrt	Mauritania	Low-middle SDI	FALSE	PM-equivalent emissions	54.9604	56.3379	55.9405	55.8971	57.6656	59.4151	60.6181	60.9046	51.33	53.8666	54.8894	58.2736	58.6908	60.2823	60.035	64.9477	63.7785	64.3951	60.1601	63.0018	63.8911	66.9714	67.9631	68.4518	68.9193	70.3265	71.6877	73.012	74.46	75.6624
mrt	Mauritania	Low-middle SDI	FALSE	Fossil/industrial fraction	0.68308	0.697635	0.705861	0.712422	0.688843	0.680255	0.684657	0.694353	0.636791	0.649211	0.663269	0.673248	0.66713	0.669157	0.658557	0.669906	0.658214	0.652343	0.618185	0.633425	0.636667	0.645188	0.651175	0.65348	0.659306	0.663139	0.665431	0.665336	0.672155	0.67765
mrt	Mauritania	Low-middle SDI	FALSE	Air pollution DALYs	171394	169914	168968	167772	163455	160190	161748	161021	161864	159669	159991	159870	158745	155145	153997	154240	153036	147478	142493	142438	137831	135768	136848	134651	128753	126147	120113	116860	112547	110384
mrt	Mauritania	Low-middle SDI	FALSE	Air pollution deaths	3169.5	3140.34	3128.5	3123.82	3041.03	2974.14	2988.67	2970.58	2992.39	2935.3	2937.47	2947.71	2939.96	2896.81	2903.01	2906.3	2914.16	2842.22	2793.01	2829.22	2782.63	2787.97	2846.84	2848.4	2767.3	2761.02	2680.71	2675.61	2639.15	2627.55
mrt	Mauritania	Low-middle SDI	FALSE	All cause DALYs	1.47604e+06	1.47668e+06	1.47905e+06	1.47957e+06	1.48525e+06	1.47693e+06	1.47457e+06	1.46859e+06	1.46665e+06	1.46115e+06	1.45647e+06	1.45053e+06	1.44444e+06	1.44026e+06	1.43114e+06	1.43032e+06	1.40129e+06	1.3848e+06	1.36504e+06	1.35285e+06	1.34141e+06	1.333e+06	1.32241e+06	1.31371e+06	1.30102e+06	1.29074e+06	1.27422e+06	1.26035e+06	1.24873e+06	1.24108e+06
mrt	Mauritania	Low-middle SDI	FALSE	All cause deaths	22782.2	22731.3	22753	22802.9	22882.2	22692.9	22633.9	22497.5	22498.1	22292.7	22136.2	22047.5	21919.9	21889.7	21761.3	21735.9	21355.9	21198.3	21040	20951.7	20872.5	20898.4	20883	20904.9	20831.5	20828.9	20757.5	20768	20865.5	20981.1
mus	Mauritius	High-middle SDI	FALSE	PM-equivalent emissions	41.4159	43.0473	44.3981	47.5152	48.4348	50.0021	50.0853	52.1248	55.9949	60.9756	63.8449	63.5528	59.7502	61.596	63.9512	68.0982	70.6073	72.2247	72.4142	72.0753	76.2677	82.5206	79.4897	79.2008	80.847	81.9395	86.5505	100.674	105.111	103.489
mus	Mauritius	High-middle SDI	FALSE	Fossil/industrial fraction	0.654374	0.678019	0.678229	0.715988	0.739027	0.717572	0.741789	0.740384	0.763808	0.834934	0.829206	0.821065	0.822383	0.821292	0.82066	0.836438	0.846109	0.855583	0.852729	0.86461	0.870176	0.883658	0.885015	0.887837	0.894927	0.882438	0.897071	0.914979	0.918448	0.917033
mus	Mauritius	High-middle SDI	FALSE	Air pollution DALYs	16589.9	16033.8	16338.2	16746.8	16669.4	16672.6	16897.9	17383.3	16777.5	16925.3	16677.9	16761.2	17317.4	17580.9	17575.3	17636.1	17315.7	16830	16830.2	16724.2	16297.5	16155.8	16214.7	15992.8	16429.6	16628.5	16768.5	16957.3	17454.9	17838.7
mus	Mauritius	High-middle SDI	FALSE	Air pollution deaths	521.056	507.527	518.082	533.162	536.4	535.574	542.126	565.96	545.701	550.33	546.933	551.586	571.132	584.134	583.203	592.316	583.485	559.221	560.465	557.276	544.654	536.636	544.488	540.059	555.422	560.326	571.165	583.826	605.216	620.719
mus	Mauritius	High-middle SDI	FALSE	All cause DALYs	327085	323212	330754	338515	339925	342246	348384	354620	348899	353822	351967	352851	359919	362578	364199	369762	372935	374499	381866	386955	386521	386653	389113	388702	396234	400376	406703	412196	418037	422567
mus	Mauritius	High-middle SDI	FALSE	All cause deaths	6865.17	6779.48	6970.97	7201.44	7301.72	7325.43	7467.42	7787.01	7608.29	7740.99	7751.9	7816.69	8041.68	8185.01	8214.54	8460.6	8548.55	8468.43	8745.81	8946.56	8975.95	8942.44	9127.13	9170.68	9450.88	9607.01	9930.33	10234.4	10509.4	10713.4
mex	Mexico	Middle SDI	TRUE	PM-equivalent emissions	4518.51	4663.27	4699.38	5019.99	5252.95	4965.14	5032.76	5258.34	5422.16	5291.45	5434.83	5339.41	5203.08	5044.81	5001.96	5019.99	4797.84	5138.87	5572.91	5137.39	5004	5140.8	5076.89	5280.11	5172.05	5327.47	5315.89	4986.7	4549.73	4569.1
mex	Mexico	Middle SDI	TRUE	Fossil/industrial fraction	0.817524	0.824677	0.830943	0.812323	0.823962	0.813945	0.821722	0.831274	0.829773	0.832673	0.834133	0.832883	0.82544	0.851069	0.847684	0.850806	0.835244	0.847692	0.864175	0.856519	0.858597	0.863939	0.861811	0.865431	0.864646	0.86957	0.870048	0.860811	0.848514	0.850188
mex	Mexico	Middle SDI	TRUE	Air pollution DALYs	1.6346e+06	1.58498e+06	1.55997e+06	1.5392e+06	1.51476e+06	1.49653e+06	1.46671e+06	1.4427e+06	1.40744e+06	1.36689e+06	1.3178e+06	1.2794e+06	1.25523e+06	1.22543e+06	1.18265e+06	1.18201e+06	1.16906e+06	1.16352e+06	1.19617e+06	1.22457e+06	1.21671e+06	1.2181e+06	1.2428e+06	1.29549e+06	1.32468e+06	1.33686e+06	1.35129e+06	1.37604e+06	1.37481e+06	1.38205e+06
mex	Mexico	Middle SDI	TRUE	Air pollution deaths	38895.5	38567.3	38798.8	39099.9	39310.7	39875	39869.8	39878.8	39417.4	38773.5	37640.8	37065	37099.3	36860.2	35871.1	36438.7	36227.4	36238.9	37956.5	39489.2	39770.8	40054	41417	43961.1	45364.6	45942.5	46109.8	46808.1	47054.6	48331.6
mex	Mexico	Middle SDI	TRUE	All cause DALYs	2.74318e+07	2.70633e+07	2.68667e+07	2.67814e+07	2.66536e+07	2.66161e+07	2.64849e+07	2.65025e+07	2.65528e+07	2.63228e+07	2.60732e+07	2.60135e+07	2.62668e+07	2.65382e+07	2.65382e+07	2.70018e+07	2.71507e+07	2.74444e+07	2.83649e+07	2.91273e+07	2.92424e+07	2.94465e+07	2.97662e+07	3.05112e+07	3.08757e+07	3.12573e+07	3.20217e+07	3.32853e+07	3.36966e+07	3.39804e+07
mex	Mexico	Middle SDI	TRUE	All cause deaths	440556	438477	440510	444565	446938	453074	454948	458057	460295	456669	452652	454950	467418	479591	481326	497575	500695	508673	537957	562930	568569	575633	589586	620912	636480	649117	668337	702830	717244	738425
fsm	Micronesia (Federated States of)	Low-middle SDI	FALSE	PM-equivalent emissions	2.17486	2.14784	2.13579	2.10351	2.11241	2.12176	2.04093	2.71286	2.75539	3.13908	3.25942	3.59954	3.25553	3.19255	3.01903	2.69799	2.35203	2.19466	2.0444	2.20339	1.95933	2.29671	2.34198	2.23441	2.28758	2.48641	2.4329	2.48568	2.53551	2.62817
fsm	Micronesia (Federated States of)	Low-middle SDI	FALSE	Fossil/industrial fraction	0.788791	0.780808	0.774965	0.766402	0.763176	0.760987	0.724709	0.792145	0.795329	0.820029	0.827931	0.845579	0.830584	0.829524	0.822505	0.804083	0.778514	0.765562	0.751144	0.771762	0.746006	0.797081	0.805986	0.800996	0.808525	0.827506	0.827956	0.833692	0.839337	0.847213
fsm	Micronesia (Federated States of)	Low-middle SDI	FALSE	Air pollution DALYs	4709.21	4620.95	4515.98	4406.26	4317.43	4185.28	4100.62	3999.79	3899.26	3800.87	3710.94	3600.76	3509.66	3417.21	3360.51	3300.5	3238.5	3178.44	3128.24	3081.45	3036.79	3014.98	3000.47	2993.07	2988.73	2967.38	2869.06	2761.85	2724.73	2713.83
fsm	Micronesia (Federated States of)	Low-middle SDI	FALSE	Air pollution deaths	119.374	118.039	116.31	114.359	112.691	110.247	108.701	106.972	105.072	103.126	101.061	98.9402	97.0286	95.1116	93.751	92.2316	90.8618	89.6471	88.6962	87.7972	86.8144	86.5504	86.4871	86.7089	86.9714	86.5725	84.0384	81.1856	80.4448	80.4954
fsm	Micronesia (Federated States of)	Low-middle SDI	FALSE	All cause DALYs	45165.9	45081.1	44918.6	44682.1	44574.7	44016	43726.2	43254.6	42760.1	42245.4	43227.5	41112.7	43505.2	40055	40026.2	39792.7	39686.9	39595.4	39607.3	39628.1	39600.1	39605.2	39640.5	39826.3	40155.6	40799.5	40871.4	41180.3	41541	41915.2
fsm	Micronesia (Federated States of)	Low-middle SDI	FALSE	All cause deaths	836.909	841.168	843.953	844.729	847.197	842.178	841.79	839.341	835.732	831.62	844.215	820.374	862.574	810.709	814.004	813.373	816.613	820.612	827.144	833.626	837.662	843.561	849.851	859.676	872.677	889.831	898.197	910.477	924.715	939.255
mng	Mongolia	Middle SDI	FALSE	PM-equivalent emissions	444.042	451.985	458.008	468.888	451.456	448.088	422.725	444.913	437.342	424.159	410.908	418.14	417.63	406.881	440.395	432.321	459.368	467.203	466.368	469.411	502.998	513.931	525.562	536.456	530.855	522.246	534.33	542.012	661.365	666.045
mng	Mongolia	Middle SDI	FALSE	Fossil/industrial fraction	0.493328	0.502771	0.46822	0.437524	0.427011	0.435263	0.442248	0.418002	0.424601	0.441425	0.461453	0.4418	0.427839	0.418228	0.398104	0.421076	0.448657	0.474166	0.489149	0.499408	0.473343	0.485367	0.497744	0.508646	0.504172	0.496792	0.508382	0.515793	0.603422	0.606467
mng	Mongolia	Middle SDI	FALSE	Air pollution DALYs	172205	166965	163202	159977	154579	150606	146371	141203	135642	131724	128555	125082	120830	117295	114082	111206	108770	105982	104012	104819	105786	106153	105355	104438	103170	101412	101578	102988	104915	107506
mng	Mongolia	Middle SDI	FALSE	Air pollution deaths	3434.8	3419.31	3411.98	3387.8	3352.26	3401.52	3419.05	3366.5	3310.76	3294.11	3285.93	3281.55	3204.06	3128.06	3044.99	2995.37	2951.37	2869.18	2831.49	2879.56	2913.93	2940.81	2918.8	2895.14	2861.58	2871.73	2958.48	3027.08	3127.21	3267.92
mng	Mongolia	Middle SDI	FALSE	All cause DALYs	1.19835e+06	1.18623e+06	1.19687e+06	1.21046e+06	1.20361e+06	1.1849e+06	1.17047e+06	1.1394e+06	1.10858e+06	1.0844e+06	1.07051e+06	1.05909e+06	1.04507e+06	1.04328e+06	1.04686e+06	1.05024e+06	1.05202e+06	1.0567e+06	1.06578e+06	1.08073e+06	1.0982e+06	1.10755e+06	1.10982e+06	1.11052e+06	1.10905e+06	1.10206e+06	1.1157e+06	1.13666e+06	1.15274e+06	1.17128e+06
mng	Mongolia	Middle SDI	FALSE	All cause deaths	20641.9	20749.2	21136.9	21432.4	21581.8	21818.8	21986.5	21586.9	21203.7	20972.2	20889.4	20892.1	20631.6	20540.5	20470.5	20550.8	20616.1	20529.1	20667.3	21098.5	21478.7	21750.9	21763.3	21749.2	21671.7	21807.9	22658.1	23345	24005.5	24859
mar	Morocco	Low-middle SDI	TRUE	PM-equivalent emissions	453.517	461.769	478.326	481.47	504.851	500.631	486.702	506.282	499.048	524.959	513.185	526.313	545.13	545.923	588.087	606.701	609.721	606.587	638.545	558.627	601.172	639.773	637.672	606.067	603.673	608.485	608.311	637.834	487.203	497.592
mar	Morocco	Low-middle SDI	TRUE	Fossil/industrial fraction	0.711467	0.70934	0.720032	0.721925	0.735482	0.731985	0.724891	0.739118	0.737822	0.752997	0.74847	0.753078	0.759278	0.756745	0.743325	0.752671	0.7568	0.759082	0.775149	0.750071	0.771457	0.787657	0.789707	0.782106	0.784521	0.786593	0.788274	0.79967	0.74004	0.747734
mar	Morocco	Low-middle SDI	TRUE	Air pollution DALYs	806708	793732	790956	788069	774973	772476	769606	776543	778813	787350	777457	773041	766914	770715	769227	768408	767625	766545	766487	763403	757982	751468	749396	766284	764689	765873	780254	799275	813756	826112
mar	Morocco	Low-middle SDI	TRUE	Air pollution deaths	18807.4	18928.2	19391.8	19770.1	19754.7	19992.5	20161.9	20625.9	21006.9	21605.1	21357.1	21319	21376.7	21956.1	22225.1	22558	22951.1	23351.3	23600.5	23802.8	23934.2	24048.4	24293.1	26032.1	26084.4	26256.4	26950.1	27856.2	28629.9	29248.8
mar	Morocco	Low-middle SDI	TRUE	All cause DALYs	1.12254e+07	1.11347e+07	1.1287e+07	1.128e+07	1.11507e+07	1.11477e+07	1.10118e+07	1.09796e+07	1.08772e+07	1.08463e+07	1.06977e+07	1.06255e+07	1.05787e+07	1.05795e+07	1.05512e+07	1.04609e+07	1.04015e+07	1.03444e+07	1.03325e+07	1.02785e+07	1.02274e+07	1.01596e+07	1.01414e+07	1.01568e+07	1.01263e+07	1.00987e+07	1.00823e+07	1.00829e+07	1.00845e+07	1.01095e+07
mar	Morocco	Low-middle SDI	TRUE	All cause deaths	177914	178640	183844	186331	185689	187411	186368	187684	188026	190221	186909	185928	186710	190669	192585	193819	195946	198414	200423	201797	203030	203979	206384	219130	219420	219998	221323	223447	225739	228124
moz	Mozambique	Low SDI	TRUE	PM-equivalent emissions	1430.04	1417.81	1401.03	1396.46	1365.21	1334.66	1349.04	1335.51	1355.99	1346.92	1355.98	1359.48	1403.36	1446.2	1480.26	1533.13	1513.11	1557.31	1548.16	1576.82	1566.5	1572.37	1583.14	1585.84	1593.12	1599.1	1650.66	1644.01	1647.38	1651.76
moz	Mozambique	Low SDI	TRUE	Fossil/industrial fraction	0.0286609	0.0276618	0.0302224	0.0328684	0.0326683	0.0350214	0.0337678	0.0349804	0.0356554	0.0366151	0.0420146	0.0450739	0.0449925	0.0514788	0.0544803	0.0501671	0.0507675	0.0547801	0.0523264	0.0535428	0.0557756	0.0591936	0.0599387	0.0613544	0.0655637	0.0693191	0.0897966	0.0943728	0.0963883	0.0989277
moz	Mozambique	Low SDI	TRUE	Air pollution DALYs	1.71884e+06	1.67037e+06	1.65119e+06	1.681e+06	1.74106e+06	1.78793e+06	1.77907e+06	1.75492e+06	1.73829e+06	1.72901e+06	1.71734e+06	1.6705e+06	1.62952e+06	1.58461e+06	1.55749e+06	1.53778e+06	1.59725e+06	1.60057e+06	1.59511e+06	1.56781e+06	1.53891e+06	1.50385e+06	1.49705e+06	1.46791e+06	1.44408e+06	1.41697e+06	1.37903e+06	1.34898e+06	1.34257e+06	1.36202e+06
moz	Mozambique	Low SDI	TRUE	Air pollution deaths	26092.5	25585.2	25480.8	25941.2	26674.2	27269.7	27252.6	27091.7	26991.4	26996.3	27056.8	26502.7	26236.5	25859.8	25831.9	25927.9	26932.5	27240.3	27563.6	27578.5	27637.9	27588.6	27827.9	27703.1	27534	27304	26883.5	26597.4	26618.3	26921.1
moz	Mozambique	Low SDI	TRUE	All cause DALYs	1.55536e+07	1.53211e+07	1.52513e+07	1.55961e+07	1.6216e+07	1.68602e+07	1.72235e+07	1.75144e+07	1.77181e+07	1.79732e+07	1.81986e+07	1.82566e+07	1.84237e+07	1.85599e+07	1.86895e+07	1.88132e+07	1.87425e+07	1.85446e+07	1.84019e+07	1.84765e+07	1.85758e+07	1.8672e+07	1.87984e+07	1.8712e+07	1.83238e+07	1.79654e+07	1.76573e+07	1.74048e+07	1.72369e+07	1.71703e+07
moz	Mozambique	Low SDI	TRUE	All cause deaths	211020	208964	208613	213076	220625	229072	234732	239871	243938	248976	254265	256731	261395	265532	269796	273874	274959	273651	272395	275329	279349	282964	287161	287227	281194	275115	270154	266591	265089	264784
mmr	Myanmar	Low-middle SDI	TRUE	PM-equivalent emissions	1331.03	1311.19	1294.88	1297.65	1340.8	1324.77	1275.85	1231.94	1221.13	1275.96	1289.46	1283.28	1370.35	1352.35	1419.82	1404.71	1413.2	1492.19	1493.56	1462.37	1453.2	1459.37	1491.22	1512.01	1539.85	1558.9	1612.84	1733.77	1778.9	1800.4
mmr	Myanmar	Low-middle SDI	TRUE	Fossil/industrial fraction	0.157625	0.161632	0.173107	0.1751	0.177581	0.187666	0.195422	0.199411	0.206186	0.205394	0.204264	0.203073	0.196283	0.212223	0.249326	0.210894	0.216943	0.230882	0.220926	0.224688	0.228241	0.230156	0.24515	0.253939	0.265816	0.27352	0.297239	0.345819	0.363235	0.371697
mmr	Myanmar	Low-middle SDI	TRUE	Air pollution DALYs	4.82019e+06	4.80182e+06	4.75871e+06	4.69775e+06	4.6175e+06	4.53727e+06	4.46199e+06	4.38272e+06	4.31978e+06	4.23699e+06	4.13736e+06	4.02082e+06	3.90186e+06	3.78839e+06	3.69266e+06	3.55543e+06	3.41758e+06	3.25848e+06	3.12357e+06	3.0005e+06	2.86983e+06	2.77555e+06	2.66942e+06	2.60484e+06	2.53267e+06	2.46956e+06	2.41607e+06	2.36663e+06	2.33179e+06	2.30606e+06
mmr	Myanmar	Low-middle SDI	TRUE	Air pollution deaths	96038.2	96878.8	97286.2	97458	97316.6	97112.1	96900.6	96539	96327.1	95821.3	94999.5	93921.3	92688.4	91432.3	90552.2	88581.7	86961.3	84694.6	82643.2	80969.3	79090.6	78197.4	76958.9	76496	75665.3	75101.6	74635	74322.5	74417.1	74544.4
mmr	Myanmar	Low-middle SDI	TRUE	All cause DALYs	3.20446e+07	3.18822e+07	3.16572e+07	3.12262e+07	3.08622e+07	3.0484e+07	3.00229e+07	2.96394e+07	2.92481e+07	2.88545e+07	2.84628e+07	2.80317e+07	2.75995e+07	2.7097e+07	2.66221e+07	2.59995e+07	2.5419e+07	2.47533e+07	3.1954e+07	2.34269e+07	2.27394e+07	2.21979e+07	2.16405e+07	2.11371e+07	2.06648e+07	2.03749e+07	2.00343e+07	2.02695e+07	1.95213e+07	1.94226e+07
mmr	Myanmar	Low-middle SDI	TRUE	All cause deaths	516578	518261	518914	516724	515617	514062	511145	509417	507500	505509	503218	500695	498079	494515	491802	484836	479418	471530	600853	454591	445684	439860	433542	428129	423288	422092	420269	428416	419203	420932
nam	Namibia	Middle SDI	FALSE	PM-equivalent emissions	185.369	194.717	202.704	197.11	184.992	189.87	158.843	172.477	135.34	139.539	142.579	176.264	174.051	218.588	288.156	298.404	300.976	328.893	318.433	331.727	353.117	372.298	365.584	343.114	362.331	316.519	339.585	340.896	347.74	352.667
nam	Namibia	Middle SDI	FALSE	Fossil/industrial fraction	0.49097	0.518779	0.540706	0.535961	0.513149	0.50881	0.43033	0.480315	0.354035	0.379903	0.416242	0.522599	0.505616	0.612155	0.697431	0.716063	0.683101	0.676305	0.666862	0.683665	0.705104	0.719263	0.71485	0.694748	0.711059	0.669257	0.691748	0.692687	0.698759	0.702989
nam	Namibia	Middle SDI	FALSE	Air pollution DALYs	75174.4	74601.6	74046.1	73241.2	73353.5	72392.6	71808	71873.1	73554.9	74826.5	76139.5	75488	76006	75182.5	73900.7	73109.7	71641.4	70868.9	69582.8	68449.3	67654.7	65766.9	63723.9	63054.7	62043.5	61114.5	60118.1	58818.2	57230.4	55356.5
nam	Namibia	Middle SDI	FALSE	Air pollution deaths	1689.9	1700.36	1715.37	1725.1	1754.84	1772.96	1790.45	1820.15	1873.87	1927.08	1976.62	1967.14	1989.63	1971.57	1938.53	1906.29	1861.46	1823.45	1786.4	1760.98	1746.19	1705.35	1679.68	1674.86	1669.92	1665.19	1655.88	1638.1	1615.72	1590.84
nam	Namibia	Middle SDI	FALSE	All cause DALYs	709559	722028	739011	765756	822260	857685	920873	992512	1.07554e+06	1.15648e+06	1.24443e+06	1.30967e+06	1.36565e+06	1.40739e+06	1.4067e+06	1.36083e+06	1.28644e+06	1.19331e+06	1.12368e+06	1.09765e+06	1.06906e+06	1.04007e+06	998308	993887	1.00781e+06	1.01204e+06	1.01217e+06	1.00746e+06	987960	979102
nam	Namibia	Middle SDI	FALSE	All cause deaths	12205.3	12515	12921.2	13492.5	14517.1	15369	16622.7	18043.7	19712.4	21364.4	23133.7	24396.5	25579.1	26395.6	26363.8	25376.4	23783.3	21855	20483.4	20019.3	19596	19035.5	18409.7	18419.1	18801.3	19075.8	19219.3	19254	18990.1	18906.9
npl	Nepal	Low SDI	TRUE	PM-equivalent emissions	350.62	358.203	362.836	368.73	377.954	384.625	388.952	393.449	400.726	410.464	427.571	433.382	440.893	452.007	472.458	473.269	482.658	496.487	506	518.964	525.301	537.165	521.539	557.129	573.295	574.771	607.837	631.853	668.271	675.285
npl	Nepal	Low SDI	TRUE	Fossil/industrial fraction	0.30588	0.312186	0.314107	0.32022	0.327761	0.332222	0.33302	0.338056	0.338968	0.342422	0.334445	0.330138	0.324681	0.322345	0.328588	0.311903	0.31199	0.302486	0.305463	0.311408	0.321756	0.323631	0.351381	0.332074	0.34418	0.339119	0.370099	0.385812	0.419596	0.425931
npl	Nepal	Low SDI	TRUE	Air pollution DALYs	2.46072e+06	2.38574e+06	2.31069e+06	2.25272e+06	2.18789e+06	2.12656e+06	2.05917e+06	1.99235e+06	1.92045e+06	1.8474e+06	1.77644e+06	1.70875e+06	1.64797e+06	1.5957e+06	1.5508e+06	1.54607e+06	1.52291e+06	1.49037e+06	1.45391e+06	1.41749e+06	1.37412e+06	1.34056e+06	1.31209e+06	1.30593e+06	1.28198e+06	1.2691e+06	1.24698e+06	1.22771e+06	1.21442e+06	1.21539e+06
npl	Nepal	Low SDI	TRUE	Air pollution deaths	42511.2	41839.2	41092.5	40762.9	40163	39630.8	38888.8	38301.1	37647.7	37010.2	36481.5	35883.3	35424.5	35216.7	35260.4	35795.5	36219.3	36626	36863.9	37110.2	37278	37891.7	38492.1	39334.8	39683.7	40296.2	40592.6	40954.5	41425.7	42114.8
npl	Nepal	Low SDI	TRUE	All cause DALYs	1.54876e+07	1.52611e+07	1.47522e+07	1.44597e+07	1.4007e+07	1.36779e+07	1.33079e+07	1.2861e+07	1.25063e+07	1.20931e+07	1.1713e+07	1.13353e+07	1.13056e+07	1.07942e+07	1.06481e+07	1.03667e+07	1.01641e+07	1.00191e+07	9.89195e+06	9.7827e+06	9.65575e+06	9.57674e+06	9.48305e+06	9.42988e+06	9.39017e+06	9.88269e+06	9.33857e+06	9.31929e+06	9.29039e+06	9.28869e+06
npl	Nepal	Low SDI	TRUE	All cause deaths	221991	219910	213682	210946	205124	201392	196724	191309	187331	182459	178457	174250	175620	169816	170092	168314	168119	168962	170029	171342	172451	174874	176865	179416	181677	193078	186293	188646	190859	193331
nld	Netherlands	High SDI	TRUE	PM-equivalent emissions	1934.06	1950.89	1938.8	1868.12	1860.22	1836.41	1869.03	1901.34	1877.73	1922.12	1969.8	2091.93	2023.2	1922.01	2051.07	2150.18	2215	2168.5	2052.09	1812.57	1701.16	1796.71	1604.36	1515.62	1482.88	1352.26	1355.22	1326.33	1336.32	1309.76
nld	Netherlands	High SDI	TRUE	Fossil/industrial fraction	0.994287	0.994553	0.994507	0.994079	0.994098	0.993012	0.992521	0.99202	0.991614	0.991502	0.991754	0.991992	0.991432	0.990914	0.990809	0.990635	0.991256	0.991104	0.989919	0.987834	0.986862	0.988089	0.9871	0.986843	0.986765	0.98585	0.985492	0.984884	0.985188	0.985075
nld	Netherlands	High SDI	TRUE	Air pollution DALYs	190030	186855	183648	185680	181604	180481	177648	172227	169748	167406	164109	158294	155231	149917	141648	135936	131646	129325	128665	128127	127181	122836	117404	110092	102974	100459	99916.5	100174	101396	101186
nld	Netherlands	High SDI	TRUE	Air pollution deaths	8847.11	8722.07	8590.81	8756.18	8575.29	8557.52	8440.5	8171.08	8067.34	7964.75	7810.39	7527.75	7432.11	7180.53	6746.53	6460.08	6244.09	6112.32	6058.19	6023.98	5972.48	5776.23	5557.25	5231.84	4905.39	4822.61	4811.14	4840.83	4946.63	4969.91
nld	Netherlands	High SDI	TRUE	All cause DALYs	4.23163e+06	4.25659e+06	4.29082e+06	4.35595e+06	4.34903e+06	4.36909e+06	4.40374e+06	4.39619e+06	4.42193e+06	4.46931e+06	4.4848e+06	4.49474e+06	4.50437e+06	4.48861e+06	4.43224e+06	4.39833e+06	4.36787e+06	4.34258e+06	4.35166e+06	4.35619e+06	4.37246e+06	4.39514e+06	4.44495e+06	4.47151e+06	4.49907e+06	4.55877e+06	4.61894e+06	4.67291e+06	4.73795e+06	4.8004e+06
nld	Netherlands	High SDI	TRUE	All cause deaths	127046	128014	129550	133134	132635	133787	135664	135531	136695	138823	139292	139728	140436	139592	136664	135313	134399	133217	133821	134126	135022	136217	138785	139752	140410	144161	147541	150440	153635	157008
nzl	New Zealand	High SDI	FALSE	PM-equivalent emissions	248.178	243.468	250.996	253.661	269.217	271.682	269.946	273.73	269.973	274.562	283.463	297.939	310.453	333.657	327.603	339.796	330.992	326.099	333.578	311.806	309.501	312.735	317.921	315.974	321.814	322.97	312.333	316.988	313.079	314.231
nzl	New Zealand	High SDI	FALSE	Fossil/industrial fraction	0.948709	0.94606	0.947632	0.946634	0.948502	0.947006	0.945367	0.944463	0.941418	0.939247	0.937761	0.940781	0.941256	0.945201	0.942272	0.944943	0.944971	0.943487	0.945525	0.942549	0.937844	0.938713	0.940486	0.940557	0.941863	0.942175	0.940936	0.940229	0.939906	0.940532
nzl	New Zealand	High SDI	FALSE	Air pollution DALYs	11158.7	10878.3	10780.7	10700.2	10339.9	10295.8	10045.4	9805.88	9410.61	9351.97	8990.83	8717.23	8430.87	7965.26	7587.86	7209.66	7113.98	7096.07	7026.12	7005.2	6950.18	6911.91	6698.2	6488.52	6466.13	6318.33	6305.4	6287.79	6826.53	7136.03
nzl	New Zealand	High SDI	FALSE	Air pollution deaths	471.891	463.528	464.35	464.352	451.673	454.999	446.493	436.749	420.492	419.638	401.918	393.898	381.718	360.948	344.61	327.123	323.165	320.788	317.264	314.932	311.333	314.582	303.569	291.691	290.14	287.033	289.819	285.836	318.729	334.237
nzl	New Zealand	High SDI	FALSE	All cause DALYs	1.03977e+06	1.03514e+06	1.03911e+06	1.04547e+06	1.04059e+06	1.0506e+06	1.05251e+06	1.04771e+06	1.03377e+06	1.04027e+06	1.03723e+06	1.04146e+06	1.04747e+06	1.05078e+06	1.05661e+06	1.05654e+06	1.06516e+06	1.07863e+06	1.08719e+06	1.09046e+06	1.09394e+06	1.11222e+06	1.11313e+06	1.11745e+06	1.13462e+06	1.1425e+06	1.15227e+06	1.16785e+06	1.19746e+06	1.21577e+06
nzl	New Zealand	High SDI	FALSE	All cause deaths	26259.4	26230.8	26631.1	26995	26881.1	27426.4	27581.9	27399.6	26917.3	27408.1	27299.1	27702.2	27906.9	27870.2	27941.2	27696.3	27915.6	28346.9	28689.3	28753.9	28896.5	29764.9	29936.9	29973.3	30768.4	31158.3	31505.6	32075.6	33681	34498.1
nic	Nicaragua	Low-middle SDI	FALSE	PM-equivalent emissions	112.412	110.741	113.328	136.889	137.58	141.007	143.856	147.35	155.15	161.169	168.626	168.737	172.886	149.433	153.246	150.33	154.688	156.027	152.882	155.153	154.469	156.84	158.517	153.37	158.079	167.666	166.674	164.165	166.336	164.906
nic	Nicaragua	Low-middle SDI	FALSE	Fossil/industrial fraction	0.381021	0.366788	0.404353	0.335129	0.349738	0.367592	0.385281	0.398684	0.421147	0.462109	0.471486	0.492271	0.496549	0.591205	0.583473	0.580037	0.602494	0.594246	0.595911	0.587612	0.602441	0.603809	0.596517	0.566725	0.570036	0.59199	0.591066	0.590509	0.596667	0.59391
nic	Nicaragua	Low-middle SDI	FALSE	Air pollution DALYs	140227	135780	128183	122539	116152	115378	111386	103813	97880.9	93365.8	89534.5	88513.4	88777.6	88420.9	88399.8	89906.8	85801.6	86407.5	85908.9	84554.7	82251.1	82455.1	82295.3	82387.3	82525	80125.1	80644.1	78492.6	78485.4	78965
nic	Nicaragua	Low-middle SDI	FALSE	Air pollution deaths	2409.17	2474.59	2398.76	2374.84	2336.4	2634.57	2639.63	2485.9	2390.13	2362.54	2318.77	2371.22	2456.69	2512.15	2563.61	2666.28	2534.81	2634.09	2663.44	2644.44	2605.49	2638.66	2661.98	2683.92	2703.94	2672.3	2708.45	2674.79	2725.13	2759.73
nic	Nicaragua	Low-middle SDI	FALSE	All cause DALYs	1.43969e+06	1.43826e+06	1.42246e+06	1.40436e+06	1.36602e+06	1.37452e+06	1.35566e+06	1.30298e+06	1.47009e+06	1.24679e+06	1.22191e+06	1.22023e+06	1.22697e+06	1.23158e+06	1.23834e+06	1.25798e+06	1.23244e+06	1.26655e+06	1.27747e+06	1.28931e+06	1.29491e+06	1.32062e+06	1.34187e+06	1.36594e+06	1.39377e+06	1.38263e+06	1.42521e+06	1.42909e+06	1.44036e+06	1.45329e+06
nic	Nicaragua	Low-middle SDI	FALSE	All cause deaths	18540.9	19221.5	19172	19217.2	19009.5	20935.5	21106.8	20182	23767.5	19663.9	19434.3	19883.6	20531.5	21043.8	21520	22384.2	21660.6	22888.4	23465.4	23833.3	24042.2	24792.9	25405.7	26033.1	26694.3	26690.7	27787.6	28117.4	28756.3	29196.3
ner	Niger	Low SDI	FALSE	PM-equivalent emissions	66.019	68.7722	71.5428	74.542	77.4403	80.4178	83.0943	85.5781	89.009	92.2321	101.956	105.202	108.999	113.279	117.747	121.78	124.998	129.837	134.597	141.425	147.791	137.862	147.217	168.12	171.415	177.416	183.187	189.851	193.025	196.512
ner	Niger	Low SDI	FALSE	Fossil/industrial fraction	0.391439	0.39232	0.393682	0.398416	0.401172	0.405597	0.411189	0.412792	0.416049	0.423185	0.456244	0.459315	0.460871	0.463862	0.46675	0.464985	0.463974	0.467749	0.474583	0.487718	0.502302	0.542829	0.544923	0.501773	0.498354	0.500977	0.503931	0.506227	0.514442	0.523148
ner	Niger	Low SDI	FALSE	Air pollution DALYs	1.8122e+06	1.8462e+06	1.89288e+06	1.93311e+06	1.93497e+06	1.97052e+06	1.93967e+06	1.96385e+06	1.968e+06	1.9849e+06	2.00171e+06	2.00425e+06	1.95634e+06	1.93737e+06	1.82639e+06	1.88758e+06	1.80974e+06	1.78004e+06	1.64682e+06	1.63036e+06	1.61507e+06	1.66564e+06	1.70667e+06	1.77339e+06	1.82361e+06	1.86698e+06	1.91565e+06	1.93621e+06	1.90424e+06	1.8947e+06
ner	Niger	Low SDI	FALSE	Air pollution deaths	24216.5	24620.3	25240.4	25798.8	25863.8	26364	26014.5	26400.8	26566.4	26864.2	27197	27358.5	26948.4	26898.5	25673.5	26525.9	25736.3	25523.2	24091.6	24053.9	24060.7	24838.5	25526	26522.5	27291.1	28196.3	29008.8	29558.3	29461.3	29504.7
ner	Niger	Low SDI	FALSE	All cause DALYs	1.30075e+07	1.34492e+07	1.35805e+07	1.38979e+07	1.40077e+07	1.4606e+07	1.43171e+07	1.44785e+07	1.46326e+07	1.48926e+07	1.51664e+07	1.53065e+07	1.51372e+07	1.5255e+07	1.47418e+07	1.47222e+07	1.43127e+07	1.4294e+07	1.3841e+07	1.39024e+07	1.40959e+07	1.43163e+07	1.45801e+07	1.47083e+07	1.48397e+07	1.50497e+07	1.51913e+07	1.5316e+07	1.54145e+07	1.55132e+07
ner	Niger	Low SDI	FALSE	All cause deaths	162584	168095	169582	173665	175118	183027	179232	181487	183722	187139	190821	192953	191084	192967	186946	187115	182450	182743	177674	178822	181642	184681	188404	190487	192508	195794	197732	199639	201207	202621
nga	Nigeria	Low-middle SDI	TRUE	PM-equivalent emissions	1803.13	1881.19	1995.37	1996.5	1971.34	2028.12	2118.53	2173.17	2154.37	2214.57	2256.95	2342.65	2371.68	2438.06	2488.81	2512.04	2466.97	2454.05	2555.06	2543.59	2666.23	2702.83	2810.56	2840.92	2786.1	2801.63	2867.81	2916.95	2937.89	2955.79
nga	Nigeria	Low-middle SDI	TRUE	Fossil/industrial fraction	0.225826	0.243678	0.270087	0.255531	0.232507	0.23797	0.251087	0.251588	0.232588	0.242861	0.23797	0.253491	0.251749	0.259631	0.2656	0.259695	0.241745	0.228367	0.248226	0.231962	0.252566	0.243176	0.240543	0.248762	0.245039	0.235327	0.241172	0.240617	0.246873	0.252223
nga	Nigeria	Low-middle SDI	TRUE	Air pollution DALYs	1.25419e+07	1.28935e+07	1.32201e+07	1.35879e+07	1.3984e+07	1.43901e+07	1.47586e+07	1.50006e+07	1.52522e+07	1.5512e+07	1.57041e+07	1.57382e+07	1.56727e+07	1.54457e+07	1.51578e+07	1.47993e+07	1.48474e+07	1.46817e+07	1.43266e+07	1.415e+07	1.3911e+07	1.36595e+07	1.36682e+07	1.37502e+07	1.38032e+07	1.37855e+07	1.37052e+07	1.32462e+07	1.28967e+07	1.26436e+07
nga	Nigeria	Low-middle SDI	TRUE	Air pollution deaths	187153	191719	196283	201266	206426	211431	216419	220129	223951	227773	230612	230981	230415	227088	223139	218335	218623	215978	211666	209789	207375	205217	206400	208049	208690	209544	208371	203340	199796	197567
nga	Nigeria	Low-middle SDI	TRUE	All cause DALYs	9.8288e+07	1.01964e+08	1.03466e+08	1.06129e+08	1.08976e+08	1.11987e+08	1.16245e+08	1.17628e+08	1.20714e+08	1.23913e+08	1.26583e+08	1.28624e+08	1.30249e+08	1.31206e+08	1.31592e+08	1.31237e+08	1.30852e+08	1.29932e+08	1.29162e+08	1.28505e+08	1.27409e+08	1.26289e+08	1.25376e+08	1.248e+08	1.24401e+08	1.2313e+08	1.21141e+08	1.19109e+08	1.17468e+08	1.16087e+08
nga	Nigeria	Low-middle SDI	TRUE	All cause deaths	1.33717e+06	1.38455e+06	1.40751e+06	1.44393e+06	1.48286e+06	1.52413e+06	1.58066e+06	1.60026e+06	1.64188e+06	1.68457e+06	1.72102e+06	1.74827e+06	1.77004e+06	1.78176e+06	1.78561e+06	1.77724e+06	1.76869e+06	1.75483e+06	1.74368e+06	1.73379e+06	1.71899e+06	1.70438e+06	1.69309e+06	1.68551e+06	1.6819e+06	1.66667e+06	1.643e+06	1.62224e+06	1.60672e+06	1.59318e+06
mkd	North Macedonia	High-middle SDI	FALSE	PM-equivalent emissions	161.083	137.171	133.064	138.826	134.937	142.076	141.39	140.381	151.791	139.766	147.071	144.325	132.942	129.616	131.914	132.913	130.223	136.711	138.087	132.805	127.652	140.157	134.467	119.802	115.094	107.565	93.7878	84.5373	74.3731	72.3886
mkd	North Macedonia	High-middle SDI	FALSE	Fossil/industrial fraction	0.944591	0.935582	0.936074	0.937142	0.938375	0.935313	0.935363	0.935761	0.949908	0.940244	0.93579	0.950502	0.942625	0.935	0.936525	0.936582	0.93347	0.938565	0.937643	0.933909	0.931752	0.935435	0.930884	0.923284	0.919413	0.916032	0.915516	0.896804	0.883939	0.882011
mkd	North Macedonia	High-middle SDI	FALSE	Air pollution DALYs	81486.1	80462.7	85057.9	85714.6	86156.8	86728.5	86804.7	87475.6	89543.2	88050.4	86622.4	87218.5	88495.4	87410.1	84379.3	83964.5	85359.8	85754.8	82894	82796.2	81216.1	79190	79298.6	76909.4	77216.5	77365.1	77207.1	76286.7	75495.2	75066.2
mkd	North Macedonia	High-middle SDI	FALSE	Air pollution deaths	3036.09	3035.81	3232.78	3300.56	3334.76	3401.55	3455.08	3509.98	3581.3	3561.66	3552.33	3595.78	3666.96	3627.77	3529.3	3542.27	3603.34	3660.82	3556.97	3550.42	3508.15	3433.49	3444.26	3334.61	3361.96	3393.46	3376.06	3356.7	3323.94	3301.39
mkd	North Macedonia	High-middle SDI	FALSE	All cause DALYs	668664	660866	680015	686338	675499	674615	671279	681492	706311	692742	680674	697406	706880	709901	698586	698988	713609	720876	708965	714162	707951	702693	713865	710061	720346	731333	742135	741614	744128	749557
mkd	North Macedonia	High-middle SDI	FALSE	All cause deaths	16644.7	16627.1	17518.7	17987.1	17917.5	18223.4	18478.2	18823.1	19378	19401.3	19557	20176.8	20708.9	20827	20635	20936	21520.9	22039.4	21674.5	21880.2	21872.4	21744.2	22199.4	22018.3	22559.6	23172.3	23474.4	23659.2	23814.1	24046.6
nor	Norway	High SDI	FALSE	PM-equivalent emissions	265.541	241.003	246.47	253.312	258.901	270.773	280.741	295.189	288.465	282.966	264.091	259.051	238.854	242.455	240.067	248.656	229.576	243.995	221.735	212.417	225.962	222.37	212.374	202.061	183.339	174.459	168.648	158.998	158.913	150.077
nor	Norway	High SDI	FALSE	Fossil/industrial fraction	0.95284	0.946565	0.944447	0.94037	0.938628	0.940196	0.943432	0.943724	0.93777	0.938328	0.936713	0.941706	0.932286	0.931035	0.934162	0.931579	0.92912	0.93571	0.925476	0.923266	0.920876	0.922399	0.922701	0.925927	0.929567	0.925116	0.925178	0.921558	0.923124	0.920234
nor	Norway	High SDI	FALSE	Air pollution DALYs	34790	32916.8	31558.4	30400.2	29013.9	28004.2	26961.9	26153	25697.9	24890.4	23991.3	22603.7	20911.3	18726.9	16759.4	15716.3	15219.1	15142.6	14840.6	14672.6	14330.3	14095.3	13383.5	12466.9	11313.5	10356.5	9563.24	8809.18	9190.44	9478.57
nor	Norway	High SDI	FALSE	Air pollution deaths	1711.8	1630.97	1576.52	1538.12	1469.68	1424.59	1379.35	1344.5	1325.03	1287.99	1244.77	1177.21	1091.33	972.899	862.976	806.713	778.115	776.647	754.466	740.826	721.104	712.495	679.612	628.914	565.394	512.514	469.956	426.66	447.776	454.022
nor	Norway	High SDI	FALSE	All cause DALYs	1.39411e+06	1.37901e+06	1.37579e+06	1.37064e+06	1.36035e+06	1.34857e+06	1.33935e+06	1.33403e+06	1.33554e+06	1.33163e+06	1.32566e+06	1.31736e+06	1.31195e+06	1.29445e+06	1.28174e+06	1.27457e+06	1.27674e+06	1.28439e+06	1.28932e+06	1.29466e+06	1.29642e+06	1.31395e+06	1.30637e+06	1.30947e+06	1.30235e+06	1.30263e+06	1.31629e+06	1.3197e+06	1.34247e+06	1.36661e+06
nor	Norway	High SDI	FALSE	All cause deaths	45182.7	44749.7	45009.3	45377	44952.5	44535.6	44203.5	44061.9	44260.6	44210.6	43876.6	43595.6	43444.6	42371.8	41525.1	41088.4	41204.9	41561.5	41414.6	41154.5	40920	41603	41395.5	41232.1	40523.4	40344.7	40639	40332	40993.2	41385.9
omn	Oman	High-middle SDI	FALSE	PM-equivalent emissions	100.361	174.816	170.12	202.844	174.56	196.563	170.168	146.547	145.905	160.458	185.573	197.197	220.119	202.97	207.224	200.676	213.232	213.328	271.936	231.837	259.73	208.063	240.675	252.276	288.967	304.742	340.469	289.33	284.111	293.883
omn	Oman	High-middle SDI	FALSE	Fossil/industrial fraction	0.998301	0.998969	0.998851	0.998844	0.998524	0.998631	0.998362	0.99799	0.998005	0.998218	0.998399	0.998447	0.998593	0.998547	0.998641	0.998473	0.998496	0.998554	0.998934	0.998719	0.998817	0.998415	0.998511	0.998451	0.99855	0.99862	0.998763	0.998544	0.998527	0.998593
omn	Oman	High-middle SDI	FALSE	Air pollution DALYs	50036.1	48399.7	46551.8	45017.6	43998.6	43499.7	43661.3	43759.4	43361.6	42517.9	41984.1	41981.9	42226.8	41248.3	39308.5	39287.9	41334.2	42845.3	43164.9	42370.9	43513	46625.6	49364.9	49596.9	49451.5	50885.7	52128.9	52563.8	51114.2	50842.9
omn	Oman	High-middle SDI	FALSE	Air pollution deaths	1341.33	1323.18	1302.98	1285.3	1282	1291.36	1314.12	1331.06	1337.32	1334.65	1338.13	1334.19	1348.06	1331.69	1280.5	1300.42	1370.63	1409.16	1415.94	1391.93	1432.71	1505.3	1555.34	1576.03	1580.54	1633.47	1671.21	1673	1593.06	1575.65
omn	Oman	High-middle SDI	FALSE	All cause DALYs	623965	619192	608407	601994	592440	583694	581813	581379	576492	565802	559225	559161	568424	564728	547040	541764	564498	602831	616696	623243	650703	715914	778244	797489	801613	822833	858244	870398	858827	857941
omn	Oman	High-middle SDI	FALSE	All cause deaths	9791.94	9835.17	9782.14	9776.35	9742.82	9736.16	9818.2	9879.52	9867.93	9782.52	9768.5	9740.59	9920.71	9858.72	9535.42	9615.69	10149.1	10758	10946.3	11002.3	11375.9	12073.7	12521.7	12637.9	12562.5	12813.7	13147.7	13106.3	12553.2	12374.2
pak	Pakistan	Low-middle SDI	TRUE	PM-equivalent emissions	2053.46	2110.07	2242.72	2415.69	2470.23	2612.87	2677.52	2750.92	2763.54	2904.8	2914.29	2942.06	3031.98	2975.54	3217.26	3328.74	3579.86	3741.28	3666.71	3844.35	3818.25	3823.88	3855.38	3988.56	4084.36	4129.72	4375.65	4512.03	4717.28	4729.22
pak	Pakistan	Low-middle SDI	TRUE	Fossil/industrial fraction	0.659744	0.657245	0.667099	0.679745	0.677274	0.685608	0.685482	0.686428	0.6799	0.687064	0.680219	0.674847	0.674022	0.659276	0.677036	0.681683	0.696047	0.702709	0.690631	0.698572	0.689987	0.684104	0.680233	0.68456	0.685711	0.682657	0.694992	0.69889	0.712129	0.712995
pak	Pakistan	Low-middle SDI	TRUE	Air pollution DALYs	1.10265e+07	1.12179e+07	1.13669e+07	1.14754e+07	1.16401e+07	1.18454e+07	1.1876e+07	1.19554e+07	1.19219e+07	1.20471e+07	1.22275e+07	1.23235e+07	1.24048e+07	1.24187e+07	1.23963e+07	1.22846e+07	1.23109e+07	1.21413e+07	1.231e+07	1.2335e+07	1.23364e+07	1.22716e+07	1.2247e+07	1.23041e+07	1.2314e+07	1.21986e+07	1.20244e+07	1.17472e+07	1.13489e+07	1.12296e+07
pak	Pakistan	Low-middle SDI	TRUE	Air pollution deaths	197444	201643	205515	208890	213202	218528	220246	222219	221767	223655	226602	228573	230045	230768	230922	230317	231097	229661	232534	233545	234580	235058	236473	239328	241205	241635	240823	238759	235474	235657
pak	Pakistan	Low-middle SDI	TRUE	All cause DALYs	7.9083e+07	8.01401e+07	8.13856e+07	8.26273e+07	8.41487e+07	8.58135e+07	8.63561e+07	8.73452e+07	8.76366e+07	8.84039e+07	8.90327e+07	8.96864e+07	9.06413e+07	9.13789e+07	9.18407e+07	9.63587e+07	9.23765e+07	9.19614e+07	9.24773e+07	9.28377e+07	9.3819e+07	9.35418e+07	9.40555e+07	9.48573e+07	9.5597e+07	9.56472e+07	9.60708e+07	9.61118e+07	9.44723e+07	9.42389e+07
pak	Pakistan	Low-middle SDI	TRUE	All cause deaths	1.19378e+06	1.2144e+06	1.23961e+06	1.2653e+06	1.29361e+06	1.32393e+06	1.3347e+06	1.35119e+06	1.35474e+06	1.36466e+06	1.37257e+06	1.38173e+06	1.39488e+06	1.40538e+06	1.41125e+06	1.48458e+06	1.41768e+06	1.41296e+06	1.42112e+06	1.4285e+06	1.44544e+06	1.44433e+06	1.45568e+06	1.46962e+06	1.48449e+06	1.492e+06	1.5022e+06	1.50935e+06	1.49642e+06	1.49988e+06
pan	Panama	Middle SDI	FALSE	PM-equivalent emissions	242.959	266.058	289.284	303.322	312.189	317.173	328.991	346.111	379.718	384.32	398.467	421.681	393.611	404.438	396.481	386.813	416.167	348.609	436.591	393.699	432.889	465.995	460.481	440.057	436.104	472.471	508.829	552.955	566.24	553.451
pan	Panama	Middle SDI	FALSE	Fossil/industrial fraction	0.93516	0.940248	0.943195	0.944207	0.948773	0.952127	0.951813	0.953829	0.957188	0.957433	0.958425	0.957729	0.954608	0.957425	0.955761	0.95779	0.960164	0.952669	0.961165	0.957874	0.961313	0.962897	0.962455	0.95946	0.959746	0.963305	0.966001	0.969234	0.970038	0.969424
pan	Panama	Middle SDI	FALSE	Air pollution DALYs	23643.2	23187.3	23338.8	23729.1	23208	23574.1	23351.2	24133.1	23863.6	23452.9	22589.4	22826	23091.6	23900	23999.7	24527	24975.3	24824.5	25076.8	25238.7	25352.7	26092.6	26899.9	27342.9	27497.5	27115	25929.4	24504.8	23981.1	23870.2
pan	Panama	Middle SDI	FALSE	Air pollution deaths	750.496	738.579	756.393	781.73	766.944	781.99	773.983	813.655	809.954	797.354	759.567	775.742	795.895	831.335	832.121	848.242	855.798	837.908	844.033	850.486	859.652	877.769	906.807	929.933	937.469	925.799	886.006	840.61	824.677	823.426
pan	Panama	Middle SDI	FALSE	All cause DALYs	586325	594981	606548	625139	634037	652000	656494	676771	683757	685933	680792	688365	699350	714942	723561	739875	762318	776016	802986	823885	836489	852857	875637	888393	900019	903370	916238	933941	948494	961755
pan	Panama	Middle SDI	FALSE	All cause deaths	9966.75	10125.4	10532.6	11097.9	11243.7	11670.7	11700.6	12322.3	12531.3	12549.4	12294.6	12555.5	12965.6	13477.4	13714.4	14165.3	14622.7	14756.4	15382	15929.6	16332.1	16669.8	17261.7	17738.7	18095.5	18256.3	18604.3	19099.2	19386.9	19797.6
png	Papua New Guinea	Low SDI	TRUE	PM-equivalent emissions	275.02	269.217	361.452	367.32	372.693	371.199	288.289	317.989	338.708	317.949	328.919	354.022	259.359	267.261	272.409	273.858	268.469	250.782	225.825	193.857	249.544	259.964	263.696	265.583	266.373	273.558	273.75	276.962	279.748	284.001
png	Papua New Guinea	Low SDI	TRUE	Fossil/industrial fraction	0.111276	0.111631	0.0887715	0.0874779	0.0830565	0.0817449	0.104986	0.105662	0.11094	0.108427	0.114058	0.124073	0.197068	0.216043	0.229102	0.217099	0.210706	0.249084	0.221832	0.244111	0.182481	0.22227	0.231613	0.235308	0.234477	0.254568	0.255801	0.263236	0.270718	0.281787
png	Papua New Guinea	Low SDI	TRUE	Air pollution DALYs	336881	342791	347968	350336	351996	355327	360655	366392	382646	392573	401565	411642	422990	433468	448884	469344	485779	496351	502753	506033	516180	522559	528258	532337	535878	539760	546167	552298	558808	563805
png	Papua New Guinea	Low SDI	TRUE	Air pollution deaths	6433.45	6579.25	6719.96	6811.83	6897.58	7016.86	7156.88	7316.01	7610.61	7830.27	8029.76	8237.65	8494.15	8748.72	9068.72	9449.13	9739.98	9987.54	10167.5	10307.3	10578.9	10770.9	10957.6	11091.7	11243.4	11438.6	11604.4	11846.2	12123.7	12351.2
png	Papua New Guinea	Low SDI	TRUE	All cause DALYs	2.17727e+06	2.2631e+06	2.30059e+06	2.34422e+06	2.38634e+06	2.43311e+06	2.47365e+06	2.52828e+06	2.75711e+06	2.69331e+06	2.78263e+06	2.88877e+06	3.00453e+06	3.11264e+06	3.22586e+06	3.32238e+06	3.41365e+06	3.49866e+06	3.56812e+06	3.66646e+06	3.73206e+06	3.79976e+06	3.88127e+06	3.9151e+06	3.96418e+06	4.03499e+06	4.11396e+06	4.18565e+06	4.26436e+06	4.32285e+06
png	Papua New Guinea	Low SDI	TRUE	All cause deaths	32445.4	33730.5	34356.8	35076.4	35775.7	36571.2	37284.5	38251.2	41884.4	41030.6	42545	44272.1	46243.1	48141.2	50138.1	51857.3	53318	54674.2	55802.3	57401.4	58565.7	59730.6	61240.4	61918.2	62867.3	64132.9	65484.4	66941.9	68545.3	69785
pry	Paraguay	Middle SDI	FALSE	PM-equivalent emissions	386.192	384.28	377.315	379.213	408.369	417.377	426.874	450.681	456.153	438.542	438.907	435.678	479.288	475.973	443.672	437.409	423.387	393.285	387.404	383.417	366.47	365.106	367.309	363.253	363.311	363.377	387.314	390.028	390.151	390.809
pry	Paraguay	Middle SDI	FALSE	Fossil/industrial fraction	0.154329	0.146878	0.164008	0.179331	0.182391	0.193139	0.184442	0.184478	0.185696	0.189208	0.165687	0.170507	0.153711	0.160109	0.171943	0.169455	0.181345	0.186588	0.193247	0.198659	0.228824	0.231804	0.239855	0.238724	0.235542	0.237022	0.239877	0.248142	0.251257	0.255179
pry	Paraguay	Middle SDI	FALSE	Air pollution DALYs	82775.9	79987.2	82886.7	83699.3	83812.3	84996.5	85466	82410.9	81620.9	81798	81085.3	79072	78461.4	79567	81200.9	80042.8	79929	77615.5	76718.2	77455.4	75975.9	72673.8	69325.8	67725.9	64100.5	62385.9	64093.7	63776.8	63366.4	63261.7
pry	Paraguay	Middle SDI	FALSE	Air pollution deaths	2109.13	2032.5	2153.37	2223.85	2269.59	2334.72	2394.63	2309.66	2319.9	2342.77	2329.43	2276.47	2276.22	2341.57	2449.21	2458.27	2495.37	2451.62	2452.67	2534.87	2552.49	2473.62	2388.51	2364.71	2235.34	2206.5	2307.75	2302.26	2288.29	2283.8
pry	Paraguay	Middle SDI	FALSE	All cause DALYs	1.08912e+06	1.08493e+06	1.12288e+06	1.14956e+06	1.16946e+06	1.20281e+06	1.22863e+06	1.2274e+06	1.24012e+06	1.26205e+06	1.28519e+06	1.29338e+06	1.31524e+06	1.35688e+06	1.42337e+06	1.40748e+06	1.42861e+06	1.43197e+06	1.45737e+06	1.49558e+06	1.51077e+06	1.52278e+06	1.53387e+06	1.56675e+06	1.57235e+06	1.5856e+06	1.63481e+06	1.65591e+06	1.67379e+06	1.69869e+06
pry	Paraguay	Middle SDI	FALSE	All cause deaths	16727.4	16428.3	17404.6	18129.2	18669.1	19510.3	20370.7	20270.5	20690.8	21237.8	21671.3	21737.8	22185.4	23220.8	24930	24924.6	25600.7	25646.8	26274.8	27573.3	28397.6	28708.9	29105.3	30219.3	30210.3	30886	32623.6	33138.2	33552.7	34171.1
per	Peru	Middle SDI	FALSE	PM-equivalent emissions	949.597	1238.76	1249.94	1292.97	1412.23	1431.76	1414.89	1358.96	1436.19	1479.16	1454.72	1543.1	1521.67	1495.75	1543.87	1503.83	1507.26	1191.02	1374.48	1379.98	1419.77	1495.97	1449.3	1577.66	1536.41	1559.33	1593.65	1589.68	1608.63	1618.86
per	Peru	Middle SDI	FALSE	Fossil/industrial fraction	0.864042	0.89539	0.895965	0.899386	0.905391	0.906031	0.904283	0.899646	0.905235	0.910229	0.906981	0.911762	0.910131	0.910382	0.912416	0.907567	0.905644	0.871155	0.903747	0.890035	0.882655	0.890043	0.893744	0.903975	0.899736	0.903097	0.905698	0.901501	0.903265	0.904434
per	Peru	Middle SDI	FALSE	Air pollution DALYs	789793	722846	691207	638266	588706	553457	510440	483442	459000	427558	420806	399150	389847	387243	376556	371231	360342	345170	344568	370437	375269	369530	361480	355053	341606	330538	325815	319105	317433	317126
per	Peru	Middle SDI	FALSE	Air pollution deaths	15697.8	14231.9	14317.4	13739.8	13170.3	12895.5	12005.7	11657.6	11401.3	10655.3	10711.8	10324.6	10318.8	10534.9	10345.4	10319.1	10158.2	9924.53	10154.8	11473.3	11955.9	11996.5	11975.9	11887.1	11505.2	11231.2	11160.1	11135.6	11255.5	11413.8
per	Peru	Middle SDI	FALSE	All cause DALYs	9.27021e+06	9.66274e+06	9.0942e+06	8.80475e+06	8.507e+06	8.35821e+06	8.08038e+06	7.93426e+06	7.78818e+06	7.4976e+06	7.44009e+06	7.19636e+06	7.08575e+06	7.07798e+06	6.94748e+06	6.8932e+06	6.80257e+06	6.69606e+06	6.71087e+06	7.06977e+06	7.16326e+06	7.1455e+06	7.18096e+06	7.24479e+06	7.2684e+06	7.26068e+06	7.34103e+06	7.40323e+06	7.46019e+06	7.50789e+06
per	Peru	Middle SDI	FALSE	All cause deaths	140428	143859	139124	137016	134564	134951	129735	129172	128813	123673	124570	120658	120290	122428	120190	119933	118907	117626	120133	134192	139553	140349	142017	143200	142554	141997	144355	147163	149766	152433
phl	Philippines	Middle SDI	TRUE	PM-equivalent emissions	1169.64	1157.74	1209.1	1217.07	1289.85	1484.67	1540.47	1634.07	1614.32	1473.72	1373.19	1410.63	1283.7	1296.84	1278.5	1212.19	1147.33	1175.82	1135.76	1107.17	1149.66	1088.52	1090.13	1154.92	1203.44	1251.08	1307.24	1376.46	1410.52	1455.82
phl	Philippines	Middle SDI	TRUE	Fossil/industrial fraction	0.728529	0.734327	0.748922	0.750449	0.767983	0.802018	0.815054	0.828749	0.830295	0.818279	0.807765	0.816185	0.801956	0.812324	0.813016	0.803545	0.794226	0.806198	0.799578	0.796658	0.806226	0.795084	0.803192	0.810142	0.81596	0.82132	0.827512	0.83376	0.838309	0.843864
phl	Philippines	Middle SDI	TRUE	Air pollution DALYs	2.21397e+06	2.13306e+06	2.0923e+06	2.06855e+06	2.0316e+06	2.00989e+06	2.00336e+06	1.99527e+06	2.02055e+06	2.11644e+06	2.21087e+06	2.30489e+06	2.38535e+06	2.42027e+06	2.44032e+06	2.55156e+06	2.60464e+06	2.63953e+06	2.72032e+06	2.78305e+06	2.80546e+06	2.81874e+06	2.79753e+06	2.72757e+06	2.66504e+06	2.65409e+06	2.62123e+06	2.58275e+06	2.53267e+06	2.50617e+06
phl	Philippines	Middle SDI	TRUE	Air pollution deaths	43170.1	41915.6	42038.6	42409	42789.8	43329	44368.7	45032.1	46618.9	49217.2	52569.1	56218.5	59690.3	61344.4	63157.9	66726.9	68885.1	70385.3	73438.4	76012.7	77602.8	78735.7	78890.9	77574.8	76301.1	76561	76123.7	75510.1	74941.9	74782.6
phl	Philippines	Middle SDI	TRUE	All cause DALYs	2.48424e+07	2.47766e+07	2.43526e+07	2.44679e+07	2.44115e+07	2.44977e+07	2.45558e+07	2.46138e+07	2.49264e+07	2.49953e+07	2.56058e+07	2.60251e+07	2.63901e+07	2.6639e+07	2.70329e+07	2.73955e+07	2.80282e+07	2.81569e+07	2.87607e+07	2.9344e+07	2.95562e+07	3.00063e+07	3.03658e+07	3.12796e+07	3.10622e+07	3.17595e+07	3.21831e+07	3.26338e+07	3.25067e+07	3.26981e+07
phl	Philippines	Middle SDI	TRUE	All cause deaths	370461	369283	367153	373345	377942	383406	389525	393099	402101	405286	420032	433230	446426	452926	463898	478389	495629	499399	516200	531351	539005	552256	564590	587724	586981	607358	618785	629388	631502	638801
pol	Poland	High SDI	TRUE	PM-equivalent emissions	3673.67	3559.44	3311.9	3304.87	3202.67	3131.13	3157.5	2955.95	2690.83	2507.12	2264.39	2228.58	2131.21	2117.26	2058.39	2058.65	2139.16	2075.4	1824.49	1689.59	1787.49	1729.96	1676.42	1596.85	1509.26	1489.73	1379.13	1407.25	1329.22	1197.04
pol	Poland	High SDI	TRUE	Fossil/industrial fraction	0.966277	0.965006	0.962722	0.95523	0.954934	0.955295	0.957349	0.955383	0.951887	0.951099	0.944741	0.940283	0.937333	0.93723	0.935655	0.932592	0.935131	0.933847	0.92266	0.911309	0.906986	0.899341	0.8916	0.889319	0.888861	0.886163	0.878442	0.88489	0.879394	0.86745
pol	Poland	High SDI	TRUE	Air pollution DALYs	1.28389e+06	1.32419e+06	1.2755e+06	1.20778e+06	1.18676e+06	1.17356e+06	1.11829e+06	1.08195e+06	1.0285e+06	1.00632e+06	936903	902720	872223	854746	852868	847000	849717	855457	850153	841978	816080	796556	776863	737747	693309	692533	683309	687357	692374	692210
pol	Poland	High SDI	TRUE	Air pollution deaths	51815.3	53652	52023.9	49810.4	48930	48604.3	46613.3	45175	42939.7	42207.1	39516.2	38157.6	37027.2	36450.7	36330.7	36157	36280.2	36579.4	36468.2	36349.1	35266.1	34536.3	33921.2	32393.6	30556.1	30691.5	30269.5	30526.6	31008	31119.2
pol	Poland	High SDI	TRUE	All cause DALYs	1.39014e+07	1.42151e+07	1.39395e+07	1.35217e+07	1.35685e+07	1.35621e+07	1.33034e+07	1.32256e+07	1.30521e+07	1.3106e+07	1.27139e+07	1.25628e+07	1.24493e+07	1.2404e+07	1.25075e+07	1.25627e+07	1.26557e+07	1.27605e+07	1.27508e+07	1.27057e+07	1.25147e+07	1.24882e+07	1.25511e+07	1.24579e+07	1.22676e+07	1.24259e+07	1.24047e+07	1.24783e+07	1.25762e+07	1.26564e+07
pol	Poland	High SDI	TRUE	All cause deaths	384700	398872	391826	381070	381850	384884	378284	377906	372627	377892	365879	361253	358120	358136	362289	365089	369022	374015	375423	377239	371425	372839	380106	380746	376599	387921	388267	393292	400720	406277
prt	Portugal	High-middle SDI	FALSE	PM-equivalent emissions	617.819	614.973	684.313	613.322	587.54	626.847	562.663	574.869	629.081	666.524	641.618	590.847	590.439	490.677	504.904	497.431	460.28	446.506	384.047	338.73	300.145	293.899	281.926	275.168	261.594	267.234	278.509	282.714	267.613	264.012
prt	Portugal	High-middle SDI	FALSE	Fossil/industrial fraction	0.917105	0.917237	0.927716	0.91813	0.912891	0.918652	0.911873	0.91605	0.914953	0.91841	0.907775	0.905795	0.905574	0.894646	0.894745	0.894592	0.88545	0.882229	0.874317	0.861999	0.877015	0.874677	0.88065	0.880436	0.874214	0.881279	0.885449	0.887326	0.882459	0.882306
prt	Portugal	High-middle SDI	FALSE	Air pollution DALYs	99159.3	98121.4	94796.3	93761.9	88796	89099.1	90057.9	90124.9	90434.8	91166.9	90168.5	88364.3	86511.1	83775	79262	76806	73456.7	69954.6	66555.9	64026	61079.9	58308.3	56156	53850.2	51307.5	48611.7	47101.5	46039.6	45539.5	45260
prt	Portugal	High-middle SDI	FALSE	Air pollution deaths	4584.44	4553.33	4409.32	4398.39	4168.57	4207.27	4269.15	4278.26	4306.86	4375.2	4332.1	4253.47	4199.32	4099.75	3883.14	3780.79	3632.15	3472.38	3307.42	3194.76	3061.65	2926.8	2856.78	2762.37	2646.33	2514.23	2444.69	2414.38	2412.32	2410.8
prt	Portugal	High-middle SDI	FALSE	All cause DALYs	3.46617e+06	3.50458e+06	3.48375e+06	3.49004e+06	3.43576e+06	3.47656e+06	3.51509e+06	3.50412e+06	3.50296e+06	3.50822e+06	3.48027e+06	3.47153e+06	3.46623e+06	3.45367e+06	3.39173e+06	3.375e+06	3.3439e+06	3.34831e+06	3.33905e+06	3.33547e+06	3.31963e+06	3.30216e+06	3.28554e+06	3.26492e+06	3.24264e+06	3.23888e+06	3.2678e+06	3.29114e+06	3.3125e+06	3.33907e+06
prt	Portugal	High-middle SDI	FALSE	All cause deaths	99333.5	100960	100302	101550	99366.4	101318	103310	103021	103759	104924	103818	103702	104477	105001	102180	101759	101165	102518	103157	103933	104322	104495	105460	105945	106289	107589	110165	112305	114123	116387
pri	Puerto Rico	High-middle SDI	FALSE	PM-equivalent emissions	86.1776	90.0366	89.6236	88.4527	87.727	89.1202	89.2217	87.6171	90.1324	91.5771	86.4919	84.0575	82.9804	83.4365	84.3125	79.0512	76.5113	78.3642	75.9282	71.0734	79.2973	51.5669	65.7023	60.7573	58.5793	58.5873	58.6148	45.6203	46.4353	45.3074
pri	Puerto Rico	High-middle SDI	FALSE	Fossil/industrial fraction	0.944148	0.945535	0.944757	0.940987	0.940247	0.941224	0.941001	0.93956	0.935212	0.936093	0.938831	0.937527	0.936864	0.938002	0.938014	0.93573	0.934141	0.936126	0.943194	0.932475	0.940663	0.918924	0.939484	0.937534	0.935587	0.935911	0.937659	0.920803	0.922514	0.920905
pri	Puerto Rico	High-middle SDI	FALSE	Air pollution DALYs	13123	13069	13339.4	13579.4	13387.1	13975.7	13719.9	13035.3	13090.2	12141	11580.2	11488.3	10624.5	10214.7	9565.65	9338.43	9094.49	9109.9	9165.64	9344.27	9079.84	9681.73	9497.19	9787.8	9797.39	9622.24	10010.8	10219.2	10598.7	10977.3
pri	Puerto Rico	High-middle SDI	FALSE	Air pollution deaths	472.215	477.117	491.053	504.152	504.667	530.825	528.087	494.004	499.217	457.334	432.964	437.413	402.328	388.337	356.849	341.553	329.068	332.602	336.952	345.343	335.249	364.876	353.549	371.251	371.814	361.773	381.868	393.243	416.403	433.782
pri	Puerto Rico	High-middle SDI	FALSE	All cause DALYs	1.06872e+06	1.09133e+06	1.12319e+06	1.15116e+06	1.16169e+06	1.19766e+06	1.18585e+06	1.14311e+06	1.16127e+06	1.12981e+06	1.1241e+06	1.13999e+06	1.10488e+06	1.10159e+06	1.10859e+06	1.11312e+06	1.09928e+06	1.09809e+06	1.09698e+06	1.1101e+06	1.08237e+06	1.11225e+06	1.07861e+06	1.08275e+06	1.06591e+06	1.04175e+06	1.06747e+06	1.16983e+06	1.07934e+06	1.08581e+06
pri	Puerto Rico	High-middle SDI	FALSE	All cause deaths	25520.3	26111.8	26969.7	27907.2	28289.6	29600.4	29662.4	28288	29468.7	28429.8	28296.6	29069.9	27984.1	28293.1	28938.2	29117.9	28625	28938.3	29149.4	29878.3	29008.1	30586	29397.5	30233.8	29990.8	29064.5	30509.3	33675.8	32284.8	32906
qat	Qatar	High-middle SDI	TRUE	PM-equivalent emissions	208.849	189.935	202.487	192.46	221.041	215.949	238.821	232.642	249.631	242.625	230.427	225.744	449.432	453.773	437.827	363.335	489.703	665.01	566.216	438.203	431.162	445.695	393.668	531.843	435.804	446	351.656	627.563	542.7	330.649
qat	Qatar	High-middle SDI	TRUE	Fossil/industrial fraction	0.999978	0.999975	0.999976	0.999973	0.999976	0.999975	0.999976	0.999974	0.999975	0.999974	0.999972	0.99997	0.999984	0.999983	0.999981	0.999975	0.999977	0.999982	0.999974	0.999964	0.999958	0.999957	0.999951	0.999963	0.999954	0.999955	0.999943	0.999969	0.999964	0.999941
qat	Qatar	High-middle SDI	TRUE	Air pollution DALYs	7441	7647.29	7878.83	8047.92	8245.53	8558.74	8823.25	9031.99	9216.08	9354.55	9468.06	9725.03	10286	10814.9	11228.9	12025.7	12960.8	13900.4	14825	15946.4	16954.7	17845.8	18919.7	20063.8	20998.3	21813.6	22168.7	22637	23761.3	25039.3
qat	Qatar	High-middle SDI	TRUE	Air pollution deaths	175.88	183.811	191.851	197.995	193.676	195.751	215.257	229.294	236.918	240.377	240.041	245.637	261.365	273.932	279.315	295.495	317.059	334.763	347.732	364.06	375.236	384.354	400.534	421.427	440.608	454.11	463.637	479.636	510.991	544.986
qat	Qatar	High-middle SDI	TRUE	All cause DALYs	102725	104980	106903	108154	110813	114559	117040	119049	120882	122780	125090	129641	136631	143651	152955	168490	188518	211677	237724	268832	295578	319363	341282	359065	374569	385201	398818	412702	430708	449903
qat	Qatar	High-middle SDI	TRUE	All cause deaths	1318.89	1361.1	1398.82	1422.59	1420.63	1455.89	1550.26	1617.12	1652.64	1669.44	1672.55	1723.33	1829.28	1908.41	1977.23	2136.94	2351.83	2558.06	2744	2980.16	3112.61	3228.29	3368.21	3499.91	3639.86	3695.48	3808.89	3942.89	4168.18	4421.48
kor	Republic of Korea	High SDI	TRUE	PM-equivalent emissions	1803.22	1976.39	2118.94	2289.51	2439.63	2573.62	2687.97	2784.38	2486.79	2569.19	2568.22	2584.56	2509.76	2673.65	2687.86	2604.31	2586.12	2358.15	2211.61	2070.23	2152.65	2094.72	2069.82	2022.66	1995.08	2085.46	2298	2201.2	2173.69	2119.87
kor	Republic of Korea	High SDI	TRUE	Fossil/industrial fraction	0.977903	0.97973	0.979467	0.980122	0.98116	0.978997	0.980875	0.980988	0.978383	0.978341	0.975344	0.975737	0.973986	0.974175	0.972733	0.972407	0.969764	0.965418	0.960328	0.959212	0.959232	0.950538	0.943814	0.941007	0.932937	0.934695	0.937203	0.927531	0.926983	0.925543
kor	Republic of Korea	High SDI	TRUE	Air pollution DALYs	537402	525045	504997	491508	486046	471561	463823	460703	460352	459963	456033	445785	440759	437035	430028	420181	409306	402724	397628	395809	397049	403212	419481	436117	449261	458382	459572	474963	496490	525626
kor	Republic of Korea	High SDI	TRUE	Air pollution deaths	18780.4	18551.1	17965.3	17623.7	17562.8	17135.7	16946	17036.4	17260.9	17473.3	17365.9	16992.7	16879.6	16803.7	16626.9	16367.7	16037.9	15863.7	15707.5	15660.9	15833.1	16259.7	17164.1	17943.9	18593.5	19237.5	19582.7	20600.1	21644.6	23115.2
kor	Republic of Korea	High SDI	TRUE	All cause DALYs	1.16579e+07	1.16248e+07	1.14842e+07	1.14033e+07	1.14082e+07	1.13197e+07	1.12208e+07	1.11331e+07	1.10965e+07	1.09942e+07	1.09558e+07	1.08569e+07	1.08467e+07	1.08612e+07	1.07893e+07	1.07296e+07	1.06885e+07	1.07487e+07	1.08298e+07	1.09462e+07	1.10626e+07	1.11388e+07	1.12428e+07	1.13233e+07	1.14257e+07	1.15071e+07	1.16049e+07	1.1863e+07	1.21259e+07	1.24013e+07
kor	Republic of Korea	High SDI	TRUE	All cause deaths	237241	238452	235683	235277	237616	236384	235791	236835	240126	241841	242115	240056	241249	242208	241070	240284	239788	241983	243983	247234	252296	256472	261981	264055	267163	272138	278498	292033	303707	318631
mda	Republic of Moldova	Middle SDI	FALSE	PM-equivalent emissions	210.681	179.854	139.913	122.745	105.765	96.1618	97.6547	83.3749	77.704	64.3516	58.1027	57.0669	59.6659	63.2668	60.2901	60.084	60.5848	59.261	58.5342	57.9357	60.3866	64.3817	61.8201	65.4053	65.3853	68.2423	68.5139	69.0525	68.6356	66.2115
mda	Republic of Moldova	Middle SDI	FALSE	Fossil/industrial fraction	0.874973	0.852786	0.810875	0.783547	0.750802	0.729883	0.73467	0.693455	0.676205	0.612946	0.572362	0.569868	0.592121	0.608615	0.587995	0.587055	0.59995	0.596829	0.593069	0.583044	0.618183	0.62684	0.592828	0.610224	0.589992	0.601125	0.603698	0.606481	0.637157	0.661984
mda	Republic of Moldova	Middle SDI	FALSE	Air pollution DALYs	160220	168040	160265	166049	185759	190109	177629	160473	149915	149285	146189	138834	134941	129800	121323	121168	113806	108607	103490	100240	99436.1	86075.9	83064.9	77645	77449.4	75917.1	65910.7	56524	55998	56022.2
mda	Republic of Moldova	Middle SDI	FALSE	Air pollution deaths	6081.29	6518.03	6271.8	6588.97	7379.15	7533.82	7044.37	6369.55	5971.14	5976.47	5876.57	5641.64	5593.33	5429.19	5046.11	4976.2	4680.61	4506.05	4306.15	4152.73	4111	3563.88	3447.73	3231.46	3229.05	3186.14	2797.17	2426.29	2425.83	2419.33
mda	Republic of Moldova	Middle SDI	FALSE	All cause DALYs	1.755e+06	1.80694e+06	1.7919e+06	1.78106e+06	1.91887e+06	1.94645e+06	1.85254e+06	1.72499e+06	1.66213e+06	1.67101e+06	1.67103e+06	1.64856e+06	1.66035e+06	1.66845e+06	1.65262e+06	1.71021e+06	1.67463e+06	1.65864e+06	1.63262e+06	1.62598e+06	1.64584e+06	1.50926e+06	1.4979e+06	1.45586e+06	1.49005e+06	1.51245e+06	1.47025e+06	1.39557e+06	1.37952e+06	1.36574e+06
mda	Republic of Moldova	Middle SDI	FALSE	All cause deaths	42699.7	45462.6	44722.9	45923.8	51225.5	52438.7	49556.4	45417.9	43504.6	44310.9	44774.8	44679	46271.9	47351.7	46703.1	48481.5	47360.2	47414.8	46792.4	46647.8	47563.2	42770.2	42696.9	41519.2	43252.6	44929.9	44284.7	42120.9	41830.7	40997.9
rou	Romania	High-middle SDI	TRUE	PM-equivalent emissions	1688.19	1399.05	1316.1	1239.33	1148.23	1145.23	1162.1	1086.86	922.45	849.267	865.764	872.466	877.872	971.89	964.679	1022.66	1059.96	937.232	965.163	841.289	744.6	714.392	649.999	576.668	548.905	524.613	473.673	476.332	452.043	426.648
rou	Romania	High-middle SDI	TRUE	Fossil/industrial fraction	0.94486	0.928879	0.921478	0.917772	0.91707	0.897634	0.909961	0.880898	0.87136	0.868567	0.873165	0.896985	0.894321	0.888507	0.871679	0.874318	0.884344	0.861369	0.840678	0.822442	0.793052	0.807212	0.782836	0.76675	0.755678	0.752926	0.725754	0.725278	0.713684	0.699921
rou	Romania	High-middle SDI	TRUE	Air pollution DALYs	800807	778594	805622	810304	812394	824848	841707	825554	770030	714141	676246	671984	664946	641250	603063	579786	551589	524661	517324	506011	487903	446597	432469	401377	398436	383567	374750	369115	366202	363936
rou	Romania	High-middle SDI	TRUE	Air pollution deaths	31878.3	31747.9	32969.3	32920	32871.5	33724	34590.8	33863.8	31783	29637.5	28097.2	28075.5	28155.2	27325	25762.7	25058.5	24010.6	22930.3	22660.4	22331.3	21777.7	20175.7	19717.4	18346.3	18275.8	17709.7	17345.9	17182.9	17128.1	17138.2
rou	Romania	High-middle SDI	TRUE	All cause DALYs	9.06966e+06	8.8677e+06	9.10084e+06	9.1767e+06	9.28403e+06	9.42354e+06	9.64364e+06	9.60601e+06	9.24256e+06	8.8353e+06	8.64057e+06	8.71008e+06	8.73376e+06	8.63575e+06	8.41238e+06	8.31953e+06	8.14317e+06	7.97362e+06	8.00784e+06	7.99843e+06	7.91056e+06	7.57976e+06	7.58378e+06	7.37343e+06	7.52985e+06	7.47722e+06	7.46541e+06	7.47112e+06	7.46166e+06	7.45151e+06
rou	Romania	High-middle SDI	TRUE	All cause deaths	245637	246259	257871	260243	264159	273788	284625	283553	272224	259217	253278	259052	264917	263852	256774	257873	253732	249293	252582	255785	256699	247083	250840	243733	252860	253802	255286	257909	260088	262811
rus	Russian Federation	High-middle SDI	TRUE	PM-equivalent emissions	25385.7	24776.2	22540.9	21850.3	18955.8	17823.8	16830.1	16248.8	16638.3	16115.5	15811	15855.5	15421.6	14812.4	14325.6	13983.5	13827.7	14036.4	13696.3	13736.7	14145.9	14620.4	14607.3	14225	14601.3	14295.2	13864.3	13667	13955.3	13813.8
rus	Russian Federation	High-middle SDI	TRUE	Fossil/industrial fraction	0.79285	0.785696	0.765881	0.724737	0.691585	0.67509	0.662624	0.635857	0.603862	0.609278	0.616817	0.614912	0.612332	0.629108	0.622918	0.619625	0.615565	0.607288	0.656391	0.630146	0.62825	0.640305	0.640452	0.63111	0.640829	0.63339	0.620494	0.615481	0.623808	0.620388
rus	Russian Federation	High-middle SDI	TRUE	Air pollution DALYs	3.31679e+06	3.2962e+06	3.49497e+06	4.12801e+06	4.48348e+06	4.18356e+06	3.82174e+06	3.53315e+06	3.42048e+06	3.66487e+06	3.79371e+06	3.79753e+06	3.81907e+06	3.79716e+06	3.59835e+06	3.66863e+06	3.32583e+06	3.17163e+06	3.20991e+06	3.06795e+06	3.08378e+06	2.81932e+06	2.64128e+06	2.44817e+06	2.3347e+06	2.16416e+06	1.96169e+06	1.74112e+06	1.73044e+06	1.76674e+06
rus	Russian Federation	High-middle SDI	TRUE	Air pollution deaths	135823	135033	141902	165097	177933	166784	154662	145090	141067	150443	154312	153788	154355	152753	144571	146884	134850	130176	132511	127939	129130	118762	111683	103861	99173.9	92829.2	84864.3	75992.4	75689.8	77516.5
rus	Russian Federation	High-middle SDI	TRUE	All cause DALYs	6.16947e+07	6.27313e+07	6.67998e+07	7.65689e+07	8.24488e+07	7.97202e+07	7.51851e+07	7.14709e+07	7.08806e+07	7.60493e+07	7.90927e+07	8.00123e+07	8.15007e+07	8.26104e+07	8.12011e+07	8.34891e+07	7.78487e+07	7.44982e+07	7.39825e+07	7.07733e+07	7.06424e+07	6.68129e+07	6.55693e+07	6.42914e+07	6.44719e+07	6.30379e+07	6.18014e+07	5.93171e+07	5.94765e+07	5.9819e+07
rus	Russian Federation	High-middle SDI	TRUE	All cause deaths	1.62099e+06	1.65508e+06	1.78152e+06	2.10013e+06	2.29271e+06	2.19822e+06	2.07047e+06	1.96824e+06	1.95094e+06	2.11742e+06	2.20772e+06	2.23988e+06	2.29604e+06	2.32961e+06	2.27453e+06	2.35e+06	2.17885e+06	2.08913e+06	2.09578e+06	2.01107e+06	2.02796e+06	1.90747e+06	1.87632e+06	1.84733e+06	1.87352e+06	1.85067e+06	1.8298e+06	1.75468e+06	1.76335e+06	1.78829e+06
rwa	Rwanda	Low SDI	FALSE	PM-equivalent emissions	90.4049	85.0983	78.4814	71.6864	79.1678	80.7606	84.0892	85.314	89.392	90.3578	90.9119	94.5597	94.2775	94.8924	97.6048	100.65	104.227	105.346	108.209	110.553	112.838	116.299	117.584	117.222	117.175	118.342	120.241	122.715	123.1	123.612
rwa	Rwanda	Low SDI	FALSE	Fossil/industrial fraction	0.162226	0.167504	0.173189	0.181595	0.164279	0.15262	0.153884	0.158706	0.159225	0.17	0.175883	0.178721	0.183442	0.188503	0.194561	0.200516	0.204181	0.205117	0.207224	0.212668	0.21752	0.219956	0.228082	0.226676	0.233647	0.233081	0.235003	0.235178	0.238131	0.241806
rwa	Rwanda	Low SDI	FALSE	Air pollution DALYs	862276	874694	840895	726740	665424	683282	720761	744204	746658	718553	695484	670599	656924	644659	652911	632309	596273	569002	541844	485579	474264	459979	458613	420912	422778	422780	418847	411551	412825	412499
rwa	Rwanda	Low SDI	FALSE	Air pollution deaths	14255.8	14584.8	14038.2	12290.9	11381.6	11698.8	12382.5	12743.5	12672.1	12150.2	11685.7	11218.2	10983.8	10751.6	10775.4	10466.1	10032.6	9741.7	9469.83	8839.98	8791.97	8726.06	8838.73	8501.75	8639.93	8769.93	8846.46	8898.35	9109.63	9285.94
rwa	Rwanda	Low SDI	FALSE	All cause DALYs	7.60327e+06	7.72892e+06	7.50621e+06	6.69963e+06	3.98294e+07	6.92433e+06	7.17815e+06	8.05666e+06	7.98501e+06	7.72178e+06	7.5415e+06	7.4327e+06	7.04348e+06	6.77593e+06	6.40175e+06	6.00524e+06	5.60766e+06	5.33005e+06	5.15736e+06	5.00901e+06	4.7863e+06	4.66084e+06	4.60928e+06	4.3448e+06	4.30473e+06	4.33775e+06	4.387e+06	4.35171e+06	4.31056e+06	4.29563e+06
rwa	Rwanda	Low SDI	FALSE	All cause deaths	111240	113811	111229	100620	606664	103351	107186	119589	117598	112942	109537	107434	101501	97426.1	91741.7	85561.6	79656	75817.9	73648.9	72108.3	69270.7	68036.1	67807	64988	65065.1	66086	67398.7	67611.5	67909.1	68571.3
lca	Saint Lucia	Middle SDI	FALSE	PM-equivalent emissions	2.43878	2.67688	2.94624	2.60529	3.06098	3.3763	3.52849	3.49083	3.26311	3.23298	3.76478	3.81629	3.67365	4.07229	3.8555	3.69643	3.67019	4.07789	4.14569	4.20686	4.46358	4.26223	5.48033	5.49143	5.36004	5.47553	5.45736	4.37358	4.42942	4.35099
lca	Saint Lucia	Middle SDI	FALSE	Fossil/industrial fraction	0.528141	0.562174	0.597817	0.54007	0.595681	0.626707	0.632425	0.622153	0.584453	0.56489	0.62803	0.635769	0.617481	0.661069	0.643792	0.648051	0.648753	0.679819	0.694622	0.685037	0.692308	0.671659	0.732905	0.727946	0.704563	0.700616	0.704368	0.640004	0.64547	0.639949
lca	Saint Lucia	Middle SDI	FALSE	Air pollution DALYs	2528.78	2454.31	2392.31	2316.83	2230.16	2182.91	2115.93	2060.12	2013.36	1999.43	1953.52	1936.94	1902.43	1872.13	1839.68	1816.27	1780.76	1749.2	1744.08	1740.7	1732.55	1768.75	1832.89	1942.72	2037.31	2120.59	2204.15	2211.04	2275.63	2354.94
lca	Saint Lucia	Middle SDI	FALSE	Air pollution deaths	86.9873	85.0514	83.4848	81.1828	78.0236	76.1088	73.3171	70.6141	68.6243	67.8552	66.6124	67.0365	66.5436	65.6206	64.2496	62.7757	61.1014	58.9193	58.3553	57.9873	57.061	57.9761	60.2463	65.5287	69.4437	72.8782	78.5673	79.2072	81.8755	84.802
lca	Saint Lucia	Middle SDI	FALSE	All cause DALYs	41474.7	41498.9	41907.2	42146.2	42222.6	41999.9	41823.6	41687.5	41722.1	41914.7	42139	42613.1	43240.6	43638.3	44031	44255.9	44322.8	44667.5	45026.2	45607	46746.6	46877.3	47856.2	49285	50176.2	51047.8	52663.7	53522.1	54326.6	55002.5
lca	Saint Lucia	Middle SDI	FALSE	All cause deaths	906.126	909.997	923.075	927.77	922.685	915.776	904.133	890.202	884.81	887.604	896.894	922.993	946.837	960.367	972.181	973.772	973.827	968.409	979.056	991.904	1009.11	1017.25	1051.99	1121.02	1166.53	1204.62	1306.67	1345.01	1380	1406.09
vct	Saint Vincent and the Grenadines	Middle SDI	FALSE	PM-equivalent emissions	0.984499	1.02002	1.07562	1.08044	1.39829	1.47968	1.49536	1.4339	1.52807	1.48616	1.41882	1.47054	1.76304	1.78515	1.88227	1.74746	1.73646	1.84644	1.98701	1.9486	2.06077	1.92142	2.47476	2.4072	2.28548	2.32504	2.31195	1.73624	1.76396	1.72269
vct	Saint Vincent and the Grenadines	Middle SDI	FALSE	Fossil/industrial fraction	0.649314	0.651739	0.663344	0.658931	0.723451	0.740614	0.737394	0.726004	0.736406	0.704976	0.712865	0.732541	0.7633	0.778055	0.785226	0.790846	0.792287	0.806541	0.835285	0.822565	0.828115	0.817935	0.853288	0.850818	0.831652	0.82303	0.828493	0.783537	0.788176	0.784274
vct	Saint Vincent and the Grenadines	Middle SDI	FALSE	Air pollution DALYs	1902.17	1877.25	1844.05	1808.82	1776.18	1721.02	1688.41	1647.32	1632.45	1597.44	1554.34	1493.16	1449.16	1408.57	1367.1	1343.65	1331.46	1328.2	1363.98	1391.53	1416.54	1469.59	1540.02	1613.48	1679.17	1708.04	1696.68	1690.43	1721.65	1768.74
vct	Saint Vincent and the Grenadines	Middle SDI	FALSE	Air pollution deaths	65.2844	64.7179	64.2511	63.4676	62.322	59.3642	58.4735	57.3057	57.0592	56.0419	55.045	52.5394	51.1966	49.7387	48.6693	47.8194	47.1336	47.1458	49.1616	50.8596	52.4798	55.1145	57.8481	60.4602	63.2951	64.3832	63.6926	63.565	64.8076	66.5889
vct	Saint Vincent and the Grenadines	Middle SDI	FALSE	All cause DALYs	34055.9	33835.5	33964.9	33866.4	33991.6	34189.3	34310	33875.5	33866.6	33991.1	34059.3	33510.1	33894.9	33235.4	33273.8	33440	33410.2	33452.9	33786	34206.2	34292.9	34410.3	35189.2	36785.5	36890.7	37416.2	37769.2	38065.2	38353.1	38632.3
vct	Saint Vincent and the Grenadines	Middle SDI	FALSE	All cause deaths	730.758	733.362	745.395	749.953	754.182	744.466	751.64	743.928	748.188	754.241	762.544	745.095	757.461	747.558	754.681	758.357	758.487	765.07	793.482	819.434	841.703	864.656	892.795	933.922	953.721	973.619	983.621	997.944	1012.18	1025.96
wsm	Samoa	Low-middle SDI	FALSE	PM-equivalent emissions	3.02546	3.00185	3.11808	3.15883	2.94862	2.99965	3.03558	3.07347	3.18626	3.27312	3.37588	3.59645	3.64686	3.7485	3.78754	3.79324	3.72489	3.50103	3.45285	3.24821	3.39202	3.86317	3.96432	3.79246	3.86695	4.09815	4.0687	4.14736	4.21957	4.34034
wsm	Samoa	Low-middle SDI	FALSE	Fossil/industrial fraction	0.742376	0.738376	0.747146	0.747704	0.727862	0.725531	0.699785	0.700871	0.709014	0.714352	0.72202	0.738478	0.741995	0.750238	0.753962	0.755038	0.750856	0.734772	0.730487	0.711923	0.723195	0.775164	0.784127	0.777359	0.782553	0.798699	0.80197	0.807934	0.813839	0.821474
wsm	Samoa	Low-middle SDI	FALSE	Air pollution DALYs	5289.6	5215.21	5168.16	5124.72	5094	5084.33	5078.46	5088.78	5096.07	5168.72	5210.63	5257.64	5314.72	5408.86	5493.57	5561.21	5622.78	5645.35	5662.33	5688.97	5714.51	5747.96	5764.29	5764.9	5763.43	5760.87	5699.78	5606	5547.39	5451.06
wsm	Samoa	Low-middle SDI	FALSE	Air pollution deaths	158.861	158.918	159.47	159.737	160.107	161.05	161.861	162.887	163.697	166.111	167.915	170.039	172.714	176.535	180	182.95	185.723	187.279	188.664	189.955	191.089	192.384	192.865	192.987	192.725	192.396	189.879	186.213	183.863	180.837
wsm	Samoa	Low-middle SDI	FALSE	All cause DALYs	51071.3	51057.4	50104.4	50009.8	50010.2	50056.7	50074.9	50120.8	50138.6	50493.3	50743.6	50952.4	51128.9	51502	51889.3	52695.4	52513.5	52699.9	52887.4	62227.8	53702.4	54183.9	55442	55266.7	55905.5	56619.2	57361.5	58080	58794	59546.6
wsm	Samoa	Low-middle SDI	FALSE	All cause deaths	1046.41	1056.34	1050.88	1057.58	1065.62	1075.2	1082.23	1087.19	1091.1	1104.3	1115.84	1127.1	1138.53	1154.41	1170.23	1192.81	1198.69	1209.16	1219.66	1380.05	1243.79	1258.01	1282.87	1283.73	1297.59	1312.61	1326.36	1339.52	1352.9	1367.16
stp	Sao Tome and Principe	Low-middle SDI	FALSE	PM-equivalent emissions	1.85003	1.83424	1.78479	1.75096	1.91904	1.99865	2.03512	2.00053	2.03241	2.06787	2.06817	2.17708	2.21343	2.28864	2.42295	2.57521	2.95196	2.7225	3.08123	3.23641	3.29411	3.56531	3.58375	3.40372	3.52716	3.61646	3.69744	3.76779	3.8408	3.90007
stp	Sao Tome and Principe	Low-middle SDI	FALSE	Fossil/industrial fraction	0.349223	0.358959	0.363168	0.365898	0.343718	0.335062	0.35067	0.364468	0.378065	0.381339	0.399479	0.411918	0.419894	0.428852	0.446934	0.462157	0.51596	0.469356	0.519307	0.538089	0.541834	0.568305	0.573419	0.55428	0.575867	0.583541	0.587981	0.588338	0.596468	0.602881
stp	Sao Tome and Principe	Low-middle SDI	FALSE	Air pollution DALYs	8682.41	8667.59	8722.26	8707.19	8764.15	8683.65	8611.48	8449.02	8278.32	8140.99	7096.37	6848.45	7150.67	6317.73	6847.95	6055.32	6379.22	6341.62	5983.62	5808.2	5825.97	5435.76	5310.31	5367.79	5545.33	5396.86	5141.69	4930.2	4809.17	4740.78
stp	Sao Tome and Principe	Low-middle SDI	FALSE	Air pollution deaths	173.283	174.961	177.689	179.015	181.324	182.928	185.233	186.075	186.563	185.734	173.805	171.019	174.627	164.078	170.728	159.003	163.539	162.26	156.414	154.466	155.038	149.853	148.378	149.95	153.555	151.77	147.03	142.872	141.308	140.44
stp	Sao Tome and Principe	Low-middle SDI	FALSE	All cause DALYs	71013.4	70597.4	71049	70710.2	71671.2	71964.5	72103.1	71938.7	71649.8	70700.5	68876.9	67122.8	65597.3	64633.4	63403.4	64038.5	61659.3	60371.5	59787.8	57055.4	55800.1	55337.3	56013.8	55863.7	54910.3	54456.3	54138.8	53877.6	53715.9	53800.9
stp	Sao Tome and Principe	Low-middle SDI	FALSE	All cause deaths	1096.66	1100	1114.22	1114.88	1134.23	1148.11	1162.72	1171.39	1176.9	1168.15	1148.98	1129.58	1114.36	1104.78	1093.82	1100.72	1073.4	1060.1	1055.91	1020.94	1007.08	1002.67	1014.03	1014.11	1006.13	1004.2	1004.64	1006.17	1007.59	1010.79
sau	Saudi Arabia	High-middle SDI	TRUE	PM-equivalent emissions	2383.47	2518.04	2729.22	2805.28	2897.57	2826.03	3050.88	2950.41	3146.32	3238.37	3265.6	3164.03	3180.62	3347.46	3509.95	3573.87	3867.14	3827.93	4167.06	4450.35	4871.57	4958.21	5072.2	5002.3	5278.09	5648.71	5851.68	5841.54	5437.93	5461.26
sau	Saudi Arabia	High-middle SDI	TRUE	Fossil/industrial fraction	0.999523	0.999509	0.999512	0.99948	0.999462	0.999419	0.999432	0.999372	0.999386	0.999364	0.999332	0.999267	0.999216	0.999219	0.999207	0.999173	0.999205	0.999186	0.999237	0.99928	0.999339	0.999336	0.99934	0.99932	0.999345	0.999386	0.999408	0.999407	0.999364	0.999368
sau	Saudi Arabia	High-middle SDI	TRUE	Air pollution DALYs	356080	357310	357881	359289	361442	366266	371801	379261	388077	398294	406577	411649	419363	431076	441606	460757	476045	490449	505458	515380	526494	531132	538429	553551	567280	588700	601416	616809	635911	659239
sau	Saudi Arabia	High-middle SDI	TRUE	Air pollution deaths	9196.24	9337.72	9457.75	9606.42	9797.91	10048.8	10322.6	10630.4	10968.6	11345.3	11662.2	11862.5	12128.1	12484.4	12795.9	13303.2	13741.8	14169.5	14585.5	14830.8	15099.9	15178.7	15324.6	15673.9	15988.3	16514	16767.1	17087.2	17511	18036.4
sau	Saudi Arabia	High-middle SDI	TRUE	All cause DALYs	5.40198e+06	5.35194e+06	5.32607e+06	5.31621e+06	5.31e+06	5.31462e+06	5.30469e+06	5.33525e+06	5.32468e+06	5.34667e+06	5.37441e+06	5.39279e+06	5.43712e+06	5.5216e+06	5.60423e+06	5.75549e+06	5.92346e+06	6.08263e+06	6.2596e+06	6.42879e+06	6.60986e+06	6.74568e+06	6.89546e+06	7.07297e+06	7.26859e+06	7.61975e+06	7.67424e+06	7.86073e+06	8.08871e+06	8.33135e+06
sau	Saudi Arabia	High-middle SDI	TRUE	All cause deaths	82637.1	82396.9	82547.3	83086.2	83792.2	84596.9	85094.9	86271.1	86728.6	87688.1	88631.9	89275	90259.7	91824.9	93023.7	95400.6	98023.7	100526	103123	105101	107287	108197	109410	111332	113688	118874	118981	121596	124921	128507
sen	Senegal	Low SDI	TRUE	PM-equivalent emissions	174.266	174.635	178.558	175.59	178.891	181.973	189.84	196.594	197.997	205.986	205.932	211.845	212.369	212.636	219.572	225.035	223.854	230.766	235.778	253.081	250.329	252.598	253.129	251.795	263.128	276.303	286.17	291.053	296.72	300.612
sen	Senegal	Low SDI	TRUE	Fossil/industrial fraction	0.340624	0.334176	0.346039	0.341122	0.349893	0.352348	0.362578	0.374559	0.393413	0.408436	0.400185	0.405738	0.408133	0.402652	0.42608	0.433912	0.427857	0.453974	0.444918	0.437095	0.452111	0.453335	0.452262	0.480295	0.487349	0.516232	0.532531	0.537828	0.546687	0.552587
sen	Senegal	Low SDI	TRUE	Air pollution DALYs	677440	671085	662426	658020	658265	646376	634678	623129	623411	623942	603842	679405	670140	636710	660558	655687	642924	642160	642579	646214	607906	608757	598477	602416	626371	627430	628944	616456	586651	571498
sen	Senegal	Low SDI	TRUE	Air pollution deaths	11088.6	11050.6	10962.8	10937.7	10990.4	10818.8	10668.8	10555.9	10609.8	10676.6	10468.2	11875.3	11850.3	11343.3	11787.3	11827.5	11765.4	11847.7	11997.1	12267.1	11715.2	11927.5	11887.7	12084.2	12590.5	12788.5	12969.3	12850.8	12513.6	12482.7
sen	Senegal	Low SDI	TRUE	All cause DALYs	6.15395e+06	6.1641e+06	6.23394e+06	6.31012e+06	6.38016e+06	6.48205e+06	6.48682e+06	6.53692e+06	6.5932e+06	6.59199e+06	6.51501e+06	6.46808e+06	6.46015e+06	6.31606e+06	6.25772e+06	6.21721e+06	6.14003e+06	6.02673e+06	5.93071e+06	5.87518e+06	5.84377e+06	5.80301e+06	5.76402e+06	5.72296e+06	5.69166e+06	5.68721e+06	5.67211e+06	5.66603e+06	5.53605e+06	5.47382e+06
sen	Senegal	Low SDI	TRUE	All cause deaths	86310.1	86617.7	87813.7	89097	90385.7	92121.9	92556.3	93684	94805.7	95211.8	94596.6	94432.6	95045.2	93221.8	92924.6	92791.2	92327.5	90983.6	89839.7	89650.8	89965.6	90143.8	90187.7	90082.7	90233.3	90854.1	91188.1	91482.1	90091.2	89908.6
syc	Seychelles	Middle SDI	FALSE	PM-equivalent emissions	6.08107	6.17766	6.06608	6.13087	6.50214	6.57021	6.62913	8.38646	8.51107	8.91308	8.98066	9.64431	9.44032	9.16031	11.4274	11.5085	12.7067	10.4825	11.4019	12.6855	10.7678	11.1631	11.1439	9.68324	9.97854	10.2911	10.6498	10.8644	11.0424	11.2335
syc	Seychelles	Middle SDI	FALSE	Fossil/industrial fraction	0.913059	0.914917	0.914816	0.916154	0.914044	0.91098	0.912742	0.934177	0.936955	0.940693	0.942608	0.945779	0.943171	0.939617	0.950671	0.948911	0.952525	0.942341	0.946149	0.952178	0.944599	0.94581	0.9467	0.941331	0.944959	0.946813	0.948746	0.949629	0.950484	0.951365
syc	Seychelles	Middle SDI	FALSE	Air pollution DALYs	836.039	833.424	835.856	838.21	852.322	844.599	840.896	827.893	823.727	823.165	819.733	829.082	851.165	873.538	868.755	874.405	880.415	872.905	872.309	878.238	880.986	889.329	908.922	922.733	944.728	979.67	1033.22	1075.33	1100	1113.5
syc	Seychelles	Middle SDI	FALSE	Air pollution deaths	28.6202	28.6025	28.7592	28.8064	29.11	28.8368	28.7516	28.2245	27.8912	27.5631	27.0102	27.1538	28.0364	28.9315	28.6919	29.4082	29.6206	29.2889	29.407	29.5618	28.8986	28.7031	29.6352	30.0726	30.511	31.5684	33.2429	34.6211	35.4171	35.779
syc	Seychelles	Middle SDI	FALSE	All cause DALYs	22234.1	22233.9	22373.9	22857.4	23253.1	23023	23188.1	23434.7	23302.3	23462.3	23536.5	23907.8	24639.3	25371.8	25694.1	25684.7	25967.5	26262.8	26336.1	26668.3	27056	27454.9	27919	28389.9	29024.9	29763.6	30513.8	30919.2	31372.9	31888.4
syc	Seychelles	Middle SDI	FALSE	All cause deaths	550.979	553.3	559.66	569.84	580.825	578.801	584.95	588.521	584.536	583.673	578.161	585.374	607.704	630.661	636.122	646.605	652.175	658.724	666.966	675.983	670.04	670.236	689.574	700.753	712.138	730.196	751.347	766.693	781.022	797.242
sle	Sierra Leone	Low SDI	FALSE	PM-equivalent emissions	179.821	180.477	170.956	200.36	208.636	212.968	209.165	204.41	204.792	203.163	195.696	193.119	196.525	161.693	163.543	152.674	153.448	157.22	160.853	168.38	174.078	176.814	177.135	178.811	179.295	180.465	181.667	183.124	183.794	184.361
sle	Sierra Leone	Low SDI	FALSE	Fossil/industrial fraction	0.0829397	0.0892208	0.0641868	0.0547618	0.0536212	0.0541257	0.0555314	0.0576259	0.0594811	0.06266	0.066862	0.0744547	0.0749436	0.0946517	0.104431	0.0911127	0.109003	0.10004	0.101015	0.105084	0.106492	0.115209	0.118446	0.127413	0.133397	0.136933	0.139223	0.140679	0.144022	0.146849
sle	Sierra Leone	Low SDI	FALSE	Air pollution DALYs	628349	611507	602382	599666	595268	592754	587349	581615	585639	599601	621902	636708	644636	645625	656082	657377	653709	643505	621172	605906	603308	588947	573974	557493	544260	528547	516329	509353	504489	497195
sle	Sierra Leone	Low SDI	FALSE	Air pollution deaths	9775.22	9548.92	9434.72	9381.81	9325.3	9324.62	9286.47	9273.04	9339.49	9532	9842.08	10065.5	10251.4	10326.8	10518.6	10612.4	10624.8	10544.2	10293.5	10145.3	10177.3	10043.6	9913.7	9740.85	9577.19	9490.33	9364.91	9362.42	9402.68	9371.06
sle	Sierra Leone	Low SDI	FALSE	All cause DALYs	4.58119e+06	4.56367e+06	4.45621e+06	4.43811e+06	4.58253e+06	4.65962e+06	4.52968e+06	4.55905e+06	4.86574e+06	4.99543e+06	4.97308e+06	5.1098e+06	5.28854e+06	5.42315e+06	5.51424e+06	5.55002e+06	5.55082e+06	5.52803e+06	5.47945e+06	5.43233e+06	5.3573e+06	5.29055e+06	5.21803e+06	5.09133e+06	5.28979e+06	5.08094e+06	4.90123e+06	4.92835e+06	4.77904e+06	4.74063e+06
sle	Sierra Leone	Low SDI	FALSE	All cause deaths	64048.6	64229.5	62875.1	62637.2	64830.5	66164	64414.2	65197.2	69792.8	71387.2	70401.3	71959.9	74353.4	76152.4	77420.8	78083.8	78275.2	78299	77833.9	77424.2	76532.4	75791.4	74915.1	73367.4	77726.3	74401.9	71562.6	72368.1	70442.3	70113.9
sgp	Singapore	High SDI	FALSE	PM-equivalent emissions	2262.03	2152.5	2423.2	2331.31	2307.96	2257.4	2495.89	2693.55	2703.62	2902.42	2842.17	2979.01	2836.35	2927.91	3270.29	3503.72	3673.87	3920.14	4171.26	4161.67	4667.13	4930.2	4681.26	4478.66	4450.5	4675.39	5107.88	5304.92	5270.17	5135.77
sgp	Singapore	High SDI	FALSE	Fossil/industrial fraction	0.99371	0.991492	0.992283	0.991792	0.991511	0.99111	0.991839	0.992292	0.992157	0.992521	0.992148	0.990732	0.990054	0.989905	0.990729	0.991002	0.991124	0.991377	0.991383	0.991167	0.990898	0.991166	0.990609	0.989545	0.989212	0.989731	0.990337	0.990822	0.990825	0.990638
sgp	Singapore	High SDI	FALSE	Air pollution DALYs	33272.1	31553.9	30326.3	29358.4	29195.5	29161	29459.4	29287.3	29497.5	28505.1	28004.9	27519.5	26939.7	25817.3	25232.7	24663	24458.5	24688.8	24943.4	24640	24698.9	25485.2	27387.5	29339	31108.2	32265	32418.7	32317.2	34055.5	35626.3
sgp	Singapore	High SDI	FALSE	Air pollution deaths	1226.11	1158.82	1108.78	1074.87	1073.57	1073.08	1087.76	1083.08	1091.71	1050.54	1028.02	1006.16	986.478	957.948	938.31	906.089	894.299	896.786	893.612	877.36	882.103	909.167	982.336	1057.43	1129.75	1173.84	1195.02	1215.77	1308.4	1373.68
sgp	Singapore	High SDI	FALSE	All cause DALYs	659525	664446	673582	681664	697995	714019	732074	740094	750145	742836	743515	750780	753552	741984	747369	752326	771769	801474	838667	857665	873230	892659	921903	939332	955685	973108	990376	998330	1.02235e+06	1.04777e+06
sgp	Singapore	High SDI	FALSE	All cause deaths	14069.6	14079.1	14162	14366.3	14817.3	15205.6	15480.5	15509.3	15626.9	15406.1	15283	15303.8	15478.9	15551.2	15777.7	15549.2	15883.4	16417.2	16947.6	17171.4	17570.1	17924.9	18624	19086.8	19595.6	20084.7	20645.5	21185.4	22244.9	23222
svk	Slovakia	High SDI	FALSE	PM-equivalent emissions	418.979	367.007	308.678	280.426	255.031	248.221	237.562	230.245	223.224	216.76	219.212	225.273	199.373	199.054	191.204	185.512	179.696	164.55	162.238	152.081	157.419	151.81	141.365	134.043	125.938	149.278	103.969	104.101	101.192	94.383
svk	Slovakia	High SDI	FALSE	Fossil/industrial fraction	0.946737	0.939827	0.946722	0.927139	0.917937	0.922681	0.917825	0.913675	0.910696	0.900874	0.901509	0.910363	0.90317	0.898063	0.892352	0.885811	0.880359	0.86554	0.861616	0.839195	0.831158	0.822263	0.805939	0.796105	0.783441	0.802333	0.731987	0.730217	0.725312	0.708478
svk	Slovakia	High SDI	FALSE	Air pollution DALYs	143345	141176	137772	132896	127790	127974	121671	121380	117607	112181	106996	105691	104857	105003	102727	104370	102684	103158	99946.4	97121.7	92606.4	90258.5	86161.7	82374.6	79627.6	80255.7	75939	75780.2	76818.8	78451.6
svk	Slovakia	High SDI	FALSE	Air pollution deaths	6025.84	5930.99	5790.35	5635.49	5454.66	5514.01	5263.12	5273.15	5090.68	4883.31	4680.84	4658.48	4611.19	4632.99	4570.95	4660.37	4607.4	4638.86	4478.49	4380.14	4187.68	4092.43	3906.4	3730.91	3588.01	3624.48	3442.45	3447.97	3497.75	3573.43
svk	Slovakia	High SDI	FALSE	All cause DALYs	1.89458e+06	1.88282e+06	1.8547e+06	1.81261e+06	1.77678e+06	1.78784e+06	1.75458e+06	1.79305e+06	1.80718e+06	1.7928e+06	1.76864e+06	1.76494e+06	1.76507e+06	1.77323e+06	1.7556e+06	1.7834e+06	1.77645e+06	1.79956e+06	1.78569e+06	1.77862e+06	1.7478e+06	1.74804e+06	1.73205e+06	1.71844e+06	1.71705e+06	1.75091e+06	1.72313e+06	1.73677e+06	1.74761e+06	1.76114e+06
svk	Slovakia	High SDI	FALSE	All cause deaths	54764.8	54179.9	53242.9	52185.2	51108.7	52028.5	50819.3	52538.1	52832.3	52606.4	51850.3	52116.6	51913.2	52322.4	52042.2	53489.1	53444.4	54494.9	53680.9	53728	52651.9	52937.5	52414.7	51998.1	51822.7	53502.3	52474.7	53248.2	53775.5	54548.9
svn	Slovenia	High SDI	FALSE	PM-equivalent emissions	267.514	247.105	252.412	251.032	245.432	185.972	179.527	183.773	174.555	158.213	155.341	124.711	123.134	118.88	108.277	101.553	78.425	76.4786	79.5234	73.0763	68.8231	72.3033	70.6261	71.6852	60.8044	56.1178	62.3073	63.9222	61.8622	61.2782
svn	Slovenia	High SDI	FALSE	Fossil/industrial fraction	0.964967	0.962457	0.963314	0.963318	0.961446	0.950815	0.954756	0.943338	0.928309	0.913007	0.915626	0.895559	0.901523	0.895791	0.884863	0.876995	0.843635	0.840601	0.840787	0.75241	0.732014	0.743777	0.747584	0.744298	0.753906	0.706701	0.728919	0.748219	0.743129	0.74394
svn	Slovenia	High SDI	FALSE	Air pollution DALYs	37632.7	37677.7	37541.4	37439.7	37063.4	36399.1	35630	34944.9	33978.1	32517.6	30876	30660.1	29318.5	29160.1	27975.9	26104	25583.6	24597.5	23499	22564.2	22059.6	21499.3	21440.1	20881.7	19574.7	20110.3	19246.9	19029.6	19451.9	19930.6
svn	Slovenia	High SDI	FALSE	Air pollution deaths	1626.06	1639.7	1640.05	1641.49	1631.31	1612.57	1583.01	1546.92	1496.84	1430.5	1349.7	1342.39	1282.92	1267.5	1223.19	1140.16	1108.71	1072.43	1026.42	997.376	982.815	969.807	974.107	949.961	889.094	921.32	888.85	887.782	914.619	939.993
svn	Slovenia	High SDI	FALSE	All cause DALYs	645598	643357	638712	637551	638106	638667	641227	645975	649438	646919	639767	648912	639225	644562	639433	624735	627663	627302	619434	613971	613514	609751	614173	610285	592704	609493	608948	616815	622215	625607
svn	Slovenia	High SDI	FALSE	All cause deaths	18541.9	18492.6	18361.5	18363.2	18428	18553.6	18729.9	18880.7	19001	18905.2	18583.7	18983.2	18578.2	18682	18638.5	18183.8	18296.9	18454.6	18282.8	18382.7	18592.8	18678.3	19041.3	18963.3	18272.4	19217.7	19324.2	19896.4	20374.9	20813.2
slb	Solomon Islands	Low SDI	FALSE	PM-equivalent emissions	3.61814	3.59478	3.74146	3.75559	3.44269	3.51291	3.59447	3.64292	3.81722	3.88826	4.29558	4.574	4.57488	4.63636	4.68476	4.61482	4.4194	4.28674	4.26878	4.06822	4.11642	4.39738	4.54428	3.94222	3.96758	4.15865	4.11593	4.1947	4.24868	4.35058
slb	Solomon Islands	Low SDI	FALSE	Fossil/industrial fraction	0.679502	0.680343	0.685353	0.682692	0.655638	0.656999	0.631456	0.630243	0.640684	0.648897	0.674514	0.692079	0.700054	0.708819	0.711865	0.705518	0.695211	0.684464	0.678559	0.662147	0.664239	0.719139	0.7373	0.707967	0.715491	0.736986	0.745122	0.754012	0.765186	0.778267
slb	Solomon Islands	Low SDI	FALSE	Air pollution DALYs	32937.2	33747.3	34346.7	34904.8	35477	35913.8	36555.4	37335.4	38828.2	39837.9	40581.7	41229.3	41811.7	42285.9	42662.8	43416.3	44080	44590	43628.6	44495.4	44745.5	45832.6	46150.4	46680.6	47210	47624.1	47462.7	47617.2	48170.4	48623.1
slb	Solomon Islands	Low SDI	FALSE	Air pollution deaths	778.92	801.499	820.339	838.455	857.371	874.087	894.666	918.844	951.185	976.22	998.923	1019.47	1036.75	1055.64	1072.8	1095.34	1118.02	1131.5	1107.91	1142.25	1152.1	1192.65	1211.81	1231.48	1254.04	1267.71	1267.22	1279.52	1302.91	1320.07
slb	Solomon Islands	Low SDI	FALSE	All cause DALYs	197399	204578	207185	211790	215723	219606	224125	228976	233856	239000	245038	251259	257755	263782	269910	275171	279434	286367	285959	290037	290836	291737	292895	295654	299315	298831	300694	303178	306033	309265
slb	Solomon Islands	Low SDI	FALSE	All cause deaths	3553.91	3694.82	3758.08	3856.72	3945.71	4035.29	4135.1	4243.25	4352.47	4467.22	4600.04	4738.44	4882.61	5018.26	5154.3	5273.72	5377.3	5520.07	5545.42	5642.81	5681.56	5717.87	5760.89	5829.13	5916.44	5937.03	5994.02	6062.8	6138.32	6220.77
som	Somalia	Low SDI	FALSE	PM-equivalent emissions	112.503	104.316	96.8303	99.1759	108.852	113.002	114.73	114.319	115.131	117.786	124.743	129.02	130.519	131.881	134.253	139.095	139.228	138.218	140.123	141.879	143.149	146.648	147.261	146.798	147.302	149.332	152.554	156.524	158.386	160.328
som	Somalia	Low SDI	FALSE	Fossil/industrial fraction	0.399722	0.380216	0.370407	0.405627	0.403184	0.400917	0.406849	0.416129	0.411147	0.410368	0.453737	0.454535	0.454789	0.45182	0.449534	0.45217	0.437261	0.422917	0.421117	0.419849	0.421677	0.421965	0.423695	0.420452	0.4308	0.431595	0.434266	0.435116	0.442171	0.449309
som	Somalia	Low SDI	FALSE	Air pollution DALYs	1.10125e+06	1.07894e+06	1.1058e+06	1.15175e+06	1.19855e+06	1.23836e+06	1.27247e+06	1.31073e+06	1.34535e+06	1.37799e+06	1.40573e+06	1.42138e+06	1.44349e+06	1.45479e+06	1.46522e+06	1.47079e+06	1.48713e+06	1.55485e+06	1.62675e+06	1.65423e+06	1.67505e+06	1.67998e+06	1.68216e+06	1.6822e+06	1.67732e+06	1.66992e+06	1.69678e+06	1.6913e+06	1.72179e+06	1.74632e+06
som	Somalia	Low SDI	FALSE	Air pollution deaths	16379.5	16149.3	16497.8	17049	17646.3	18192.2	18683	19235	19746.9	20207.3	20617.4	20890.9	21307.5	21613.6	21914.5	22136	22464.6	23462.8	24519.9	25046.8	25474.8	25715.3	25937.9	26142.2	26323	26493.1	27037.9	27221.9	27837.6	28333.5
som	Somalia	Low SDI	FALSE	All cause DALYs	8.51652e+06	8.7799e+06	8.59584e+06	8.50052e+06	8.9042e+06	9.10344e+06	9.41271e+06	9.90561e+06	1.00295e+07	1.03096e+07	1.05816e+07	1.0793e+07	1.10099e+07	1.11995e+07	1.14563e+07	1.1472e+07	1.16621e+07	1.19785e+07	1.20015e+07	1.20771e+07	1.29825e+07	1.303e+07	1.23024e+07	1.22773e+07	1.23589e+07	1.25039e+07	1.27821e+07	1.30558e+07	1.30703e+07	1.30338e+07
som	Somalia	Low SDI	FALSE	All cause deaths	116843	121492	119176	117283	122705	125614	129900	136823	138189	141949	145441	148305	151230	153815	157511	157652	160421	164819	165730	167299	179251	180130	171829	171654	173107	175393	179422	183697	184394	184231
zaf	South Africa	Middle SDI	TRUE	PM-equivalent emissions	3768.44	3694.6	3722.08	3707.71	3801.53	3970.8	4149.03	4216.76	4364.34	4138.49	4051.34	4543.42	4546.5	4663.92	4855.43	4744.7	4681.46	4864.31	5209.75	4816.66	4907.11	4724.24	4938.91	4991.38	5183.94	4862.69	4821.88	4806.75	4839.92	4880.99
zaf	South Africa	Middle SDI	TRUE	Fossil/industrial fraction	0.869848	0.865657	0.863725	0.857481	0.856501	0.861302	0.865675	0.866658	0.870857	0.865628	0.869642	0.888828	0.892782	0.903786	0.912467	0.911154	0.91111	0.916204	0.922465	0.914324	0.916433	0.91317	0.916616	0.917374	0.920204	0.9164	0.915524	0.915382	0.916387	0.917562
zaf	South Africa	Middle SDI	TRUE	Air pollution DALYs	1.30905e+06	1.28632e+06	1.30418e+06	1.24853e+06	1.26484e+06	1.25583e+06	1.28571e+06	1.38872e+06	1.43984e+06	1.43875e+06	1.50278e+06	1.4948e+06	1.51335e+06	1.53057e+06	1.52061e+06	1.51205e+06	1.51369e+06	1.46617e+06	1.43226e+06	1.37763e+06	1.31697e+06	1.25608e+06	1.21576e+06	1.18427e+06	1.17801e+06	1.155e+06	1.11448e+06	1.08526e+06	1.03437e+06	1.01378e+06
zaf	South Africa	Middle SDI	TRUE	Air pollution deaths	25961.8	26088.6	27368.1	26658.2	28087.7	28530.4	30765.5	34606.3	36034.9	35580.1	37239	36861.4	37110.7	37406.3	36967.4	37004	37832.1	37154	36854	36412.9	35755.1	34633.3	33799.4	33330.4	33633.3	33690.2	33229.7	32619.3	30552.9	29829.8
zaf	South Africa	Middle SDI	TRUE	All cause DALYs	1.84186e+07	1.85715e+07	1.93319e+07	1.91176e+07	2.00058e+07	2.07709e+07	2.19752e+07	2.45076e+07	2.67095e+07	2.85076e+07	3.11513e+07	3.30091e+07	3.5222e+07	3.72957e+07	3.86764e+07	3.93821e+07	3.95255e+07	3.84868e+07	3.72177e+07	3.53841e+07	3.36173e+07	3.17088e+07	3.01054e+07	2.89354e+07	2.85737e+07	2.83253e+07	2.81338e+07	2.79047e+07	2.69686e+07	2.65879e+07
zaf	South Africa	Middle SDI	TRUE	All cause deaths	293904	299910	319452	316666	339697	356657	388797	448068	490878	520237	571881	605075	646889	687444	713469	730351	740951	724828	704779	677258	649474	613774	582778	562131	560061	561295	561607	557910	531726	521802
esp	Spain	High SDI	TRUE	PM-equivalent emissions	3585.87	3657.76	3653.01	3513.06	3441.07	3318.82	3239.12	3424.17	3365.79	3373.35	3299.4	3305.16	3462.85	3233.98	3304.45	3303.69	3152.62	3098.04	2283.79	2091.04	1961.78	2000.8	1940.02	1673.75	1751.16	1730.25	1702.51	1657.61	1629.84	1566.12
esp	Spain	High SDI	TRUE	Fossil/industrial fraction	0.974718	0.975849	0.976534	0.975287	0.9749	0.971308	0.970841	0.972754	0.972035	0.971873	0.971707	0.971244	0.972864	0.97142	0.971777	0.974636	0.972341	0.971166	0.962251	0.957341	0.955999	0.955735	0.954525	0.946777	0.948199	0.946988	0.946673	0.945685	0.945516	0.944061
esp	Spain	High SDI	TRUE	Air pollution DALYs	351645	338548	322288	313772	307865	311185	314643	316485	324282	334502	329516	325324	324131	320150	309270	301334	291087	284873	277048	268882	261110	256546	251189	241904	236697	232746	219347	212187	216296	219314
esp	Spain	High SDI	TRUE	Air pollution deaths	16349.5	15742.7	14928.6	14617.2	14406.7	14729.2	14982.3	15143	15652.1	16242.1	15892.8	15693.7	15856.4	15840	15329.3	14922.5	14302.2	13966.3	13576.8	13185.8	12818.4	12730.9	12661.3	12282.7	12211.7	12208.6	11506.4	11153.6	11557.3	11785
esp	Spain	High SDI	TRUE	All cause DALYs	1.14143e+07	1.14758e+07	1.14343e+07	1.14333e+07	1.14553e+07	1.15494e+07	1.16233e+07	1.15028e+07	1.15698e+07	1.17194e+07	1.16911e+07	1.17483e+07	1.18825e+07	1.20627e+07	1.21026e+07	1.21694e+07	1.2181e+07	1.22905e+07	1.23512e+07	1.23165e+07	1.22853e+07	1.23364e+07	1.23532e+07	1.22806e+07	1.23012e+07	1.241e+07	1.24015e+07	1.24668e+07	1.25502e+07	1.26521e+07
esp	Spain	High SDI	TRUE	All cause deaths	327018	330859	329869	332774	335617	341762	347522	346469	354175	362272	358116	359521	366058	374668	373864	376324	374129	378761	381638	380382	379464	385423	391017	389679	395161	407340	408795	414069	421728	428577
lka	Sri Lanka	Middle SDI	FALSE	PM-equivalent emissions	357.772	359.058	385.367	395.052	396.651	393.129	449.87	439.447	453.353	466.635	493.017	488.446	501.682	510.495	527.981	558.674	535.086	551.705	557.746	555.919	580.087	607.585	657.677	587.618	633.223	672.271	701.958	706.095	782.658	802.872
lka	Sri Lanka	Middle SDI	FALSE	Fossil/industrial fraction	0.385254	0.368041	0.384678	0.393206	0.396413	0.38103	0.432625	0.402453	0.416949	0.417702	0.432356	0.426931	0.439116	0.440292	0.447746	0.46861	0.43443	0.448632	0.452824	0.437395	0.44847	0.474855	0.47651	0.464474	0.497636	0.53278	0.560538	0.567172	0.609589	0.619495
lka	Sri Lanka	Middle SDI	FALSE	Air pollution DALYs	419514	390163	388361	372884	387678	400883	413852	432188	411251	415404	421097	406087	397207	406217	405476	433150	420647	419088	433441	436778	437943	441173	430986	412602	408681	401554	401889	403027	399538	400219
lka	Sri Lanka	Middle SDI	FALSE	Air pollution deaths	12826.1	11972.8	11894.8	11520.5	11953	12457	12840.8	13653.5	13229.6	13481.4	13662.9	13206.5	13103.7	13594.7	13672.8	14240.1	14459.6	14550.4	15025.9	15144.2	15216.7	15374.3	15098.5	14468.7	14362.1	14057.9	14103.6	14194	13995	14114
lka	Sri Lanka	Middle SDI	FALSE	All cause DALYs	5.5679e+06	5.46276e+06	5.33388e+06	5.00705e+06	5.08883e+06	5.61278e+06	5.72041e+06	5.83889e+06	5.7073e+06	5.60843e+06	5.75413e+06	5.47299e+06	5.27226e+06	5.33355e+06	7.2205e+06	5.56509e+06	5.55028e+06	5.482e+06	5.89565e+06	5.99268e+06	5.82474e+06	5.42338e+06	5.41839e+06	5.39659e+06	5.47022e+06	5.4795e+06	5.54723e+06	5.61954e+06	5.63012e+06	5.72141e+06
lka	Sri Lanka	Middle SDI	FALSE	All cause deaths	105299	102121	100294	94966.2	97765	108563	111731	117663	115965	116173	119779	114355	111925	115377	150937	120225	122641	122238	130208	131957	129902	124894	125926	125558	128157	127815	130188	132531	132197	135633
sdn	Sudan	Low-middle SDI	FALSE	PM-equivalent emissions	430.443	431.255	441.166	434.819	483.325	486.078	500.489	523.209	520.833	529.791	545.174	565.624	587.642	606.466	622.355	647.051	690.458	686.692	711.496	718.079	710.622	700.853	690.434	685.328	651.116	701.239	738.91	738.539	746.798	754.911
sdn	Sudan	Low-middle SDI	FALSE	Fossil/industrial fraction	0.403969	0.39541	0.396563	0.38183	0.412954	0.407764	0.402749	0.421642	0.410446	0.419987	0.426982	0.439561	0.455058	0.457641	0.461666	0.477289	0.492672	0.513309	0.533131	0.535036	0.535691	0.5266	0.53354	0.529695	0.505896	0.540133	0.563427	0.562944	0.568913	0.574585
sdn	Sudan	Low-middle SDI	FALSE	Air pollution DALYs	2.05695e+06	2.04175e+06	2.02718e+06	2.00134e+06	1.9738e+06	1.93527e+06	1.8973e+06	1.86017e+06	1.82544e+06	1.78027e+06	1.73882e+06	1.68996e+06	1.64367e+06	1.59169e+06	1.55295e+06	1.54178e+06	1.51071e+06	1.46567e+06	1.41872e+06	1.37512e+06	1.32776e+06	1.28215e+06	1.24969e+06	1.20998e+06	1.18571e+06	1.15459e+06	1.12619e+06	1.09901e+06	1.07591e+06	1.05865e+06
sdn	Sudan	Low-middle SDI	FALSE	Air pollution deaths	38059	38225.1	38358.6	38333.9	38284.2	38057.9	37800.5	37513.3	37206.7	36723.6	36210.8	35564	34979	34240.4	33672.9	33423.4	32957.2	32305	31661.7	31092.3	30499.5	29948.4	29603.8	29128.1	28818.4	28533.3	28305	28140.8	28121.8	28162.7
sdn	Sudan	Low-middle SDI	FALSE	All cause DALYs	1.83205e+07	1.83096e+07	1.83776e+07	1.84915e+07	1.81603e+07	1.80717e+07	1.80962e+07	1.80764e+07	1.81439e+07	1.76251e+07	1.7418e+07	1.71568e+07	1.70655e+07	1.68832e+07	1.69284e+07	1.59464e+07	1.57826e+07	1.54487e+07	1.51131e+07	1.49858e+07	1.46266e+07	1.45396e+07	1.41116e+07	1.39549e+07	1.36994e+07	1.35356e+07	1.33701e+07	1.3144e+07	1.29141e+07	1.27006e+07
sdn	Sudan	Low-middle SDI	FALSE	All cause deaths	254139	255054	256902	259963	255838	255954	257479	258439	260051	253383	251491	248648	248512	246950	248523	234545	232542	228439	224341	223575	219148	219130	213750	212710	209953	208705	207231	205094	203625	202165
sur	Suriname	Middle SDI	FALSE	PM-equivalent emissions	22.0967	24.1837	24.849	24.9481	24.5549	24.9446	24.1524	23.7517	24.1992	22.8258	34.312	35.2332	26.1065	26.9341	30.8175	37.101	32.5578	30.1394	29.1887	30.4445	35.8294	39.5175	42.663	45.4438	44.027	45.9315	42.8634	43.2921	44.7458	44.4399
sur	Suriname	Middle SDI	FALSE	Fossil/industrial fraction	0.541503	0.587671	0.577025	0.531932	0.523984	0.55172	0.56264	0.561407	0.556717	0.522346	0.70662	0.710186	0.660091	0.71761	0.72244	0.762974	0.733248	0.688458	0.706928	0.725675	0.747668	0.770813	0.786162	0.79777	0.791544	0.800401	0.788746	0.791082	0.798103	0.796931
sur	Suriname	Middle SDI	FALSE	Air pollution DALYs	9569.77	9749.85	9870.96	10219.2	9684.51	8679.67	8587.92	8784.95	9335.91	9879.54	9992.32	10024.2	9996.51	9740.16	9346.45	8965.47	8777.08	8691.96	8695.24	8692.9	8780.95	8845.27	8993.26	9497.59	9962.21	10452.4	10259.2	9840.7	9675.07	9541.77
sur	Suriname	Middle SDI	FALSE	Air pollution deaths	274.722	283.671	288.702	303.205	280.706	240.68	237.286	244.114	265.171	285.706	296.46	303.082	304.514	295.487	283.489	270.51	262.734	258.491	258.677	258.678	260.97	262.736	269.205	289.192	309.868	328.716	324.667	312.884	309.816	307.529
sur	Suriname	Middle SDI	FALSE	All cause DALYs	144273	144721	146042	150817	146846	138812	139088	141722	148016	154834	160108	164470	167905	170074	171731	171468	171659	172784	175398	175204	177045	176678	176817	180070	183848	188215	190681	192483	193999	195219
sur	Suriname	Middle SDI	FALSE	All cause deaths	2696.86	2761.65	2810.06	2952.28	2791.06	2497.07	2485.28	2547.07	2727.42	2914.93	3080.46	3212.75	3307.32	3338.46	3361.06	3331.83	3317.59	3335.59	3411.69	3428.43	3481.61	3482.9	3520.81	3679.82	3862.91	4026.66	4130.42	4219.16	4303.05	4370.59
swe	Sweden	High SDI	FALSE	PM-equivalent emissions	434.612	445.248	446.253	429.691	448.073	432.422	431.19	439.266	459.242	438.63	419.56	411.941	377.901	428.516	453.323	453.21	458.637	441.671	422.102	424.196	410.807	368.282	348.766	323.452	325.635	302.685	328.531	357.394	342.229	345.467
swe	Sweden	High SDI	FALSE	Fossil/industrial fraction	0.907619	0.905366	0.906386	0.900361	0.903092	0.897418	0.895349	0.89663	0.90327	0.905782	0.892563	0.894484	0.88612	0.894718	0.898079	0.888453	0.888217	0.882131	0.874101	0.871455	0.857942	0.843371	0.821619	0.829444	0.835562	0.823317	0.831275	0.84248	0.837236	0.840387
swe	Sweden	High SDI	FALSE	Air pollution DALYs	54273.8	52199.8	49356.1	47425.2	44393.9	43384.1	42243.8	41075	40082.9	39113.4	37829.4	36222.2	34074.5	31416	29145.2	27675.6	27236.4	27199.1	26902.4	26967.1	26625.3	25444.4	23250.1	20289.7	17513.6	15770.6	14959.4	14453.1	14756.6	14595.8
swe	Sweden	High SDI	FALSE	Air pollution deaths	2786.33	2692.28	2567.95	2492.15	2332.24	2298.31	2255.66	2197.85	2149.45	2099.27	2033.57	1948.63	1842.37	1693.31	1560.7	1485.45	1460.11	1457.45	1427.85	1422.35	1403.19	1346.23	1235.19	1073.48	924.276	825.481	776.844	744.842	770.265	758.165
swe	Sweden	High SDI	FALSE	All cause DALYs	2.75602e+06	2.76011e+06	2.73785e+06	2.72694e+06	2.69803e+06	2.67424e+06	2.6631e+06	2.64809e+06	2.64545e+06	2.64064e+06	2.62755e+06	2.62466e+06	2.62092e+06	2.61011e+06	2.60897e+06	2.59163e+06	2.59477e+06	2.59595e+06	2.59336e+06	2.59955e+06	2.60069e+06	2.61142e+06	2.62387e+06	2.63572e+06	2.64139e+06	2.66111e+06	2.67917e+06	2.69982e+06	2.72587e+06	2.74865e+06
swe	Sweden	High SDI	FALSE	All cause deaths	93284.3	93974.2	93885.5	94284.7	92608	92679.8	93005.9	92756.2	92942	93190.6	92724.2	92690.9	92866.7	91823.5	91178.5	90494.5	90806.1	90779.1	90137.7	89933.4	89964	90481.1	90593.3	90249.6	89800.6	90657.8	91764.8	92758.1	93565.9	93801.2
che	Switzerland	High SDI	FALSE	PM-equivalent emissions	191.571	193.642	188.564	174.262	168.217	166.597	164.19	156.028	157.895	153.334	150.606	150.149	139.066	137.348	133.941	133.317	130.26	126.053	127.353	121.695	121.815	114.434	115.386	114.692	108.746	104.805	103.9	101.695	97.5538	96.3549
che	Switzerland	High SDI	FALSE	Fossil/industrial fraction	0.908751	0.906848	0.90867	0.892284	0.895204	0.892065	0.877761	0.887223	0.885277	0.90544	0.851106	0.851733	0.84387	0.838816	0.839502	0.836219	0.831466	0.831026	0.831566	0.81488	0.80696	0.816212	0.812715	0.812659	0.821175	0.812219	0.803426	0.803732	0.798523	0.798996
che	Switzerland	High SDI	FALSE	Air pollution DALYs	74669.1	73530.3	71185.2	68444.6	66562.8	65484.2	62342.7	60399	58137.6	55573.2	53370.7	50602.4	49119.9	47400.2	45149.2	43663.1	42925.9	42659.3	42355.2	42684	42242.1	41370.5	40773.4	39763.6	38193.2	36345.4	32400.7	29722.5	30501.2	31309.8
che	Switzerland	High SDI	FALSE	Air pollution deaths	3740.21	3680.49	3568.19	3453.31	3379.98	3388.42	3254.67	3159.31	3042.79	2913.37	2785.66	2628.16	2563.9	2478.45	2340.08	2250.99	2203.11	2182.07	2158.38	2166.87	2136.09	2084.37	2063.52	2011.56	1935.44	1853.35	1649.99	1512.98	1565.66	1607.59
che	Switzerland	High SDI	FALSE	All cause DALYs	2.12585e+06	2.13608e+06	2.12755e+06	2.1142e+06	2.10824e+06	2.13663e+06	2.10843e+06	2.09623e+06	2.08562e+06	2.07741e+06	2.08016e+06	2.06695e+06	2.06266e+06	2.06199e+06	2.04977e+06	2.04997e+06	2.05481e+06	2.06347e+06	2.07364e+06	2.09394e+06	2.1025e+06	2.11201e+06	2.13455e+06	2.15359e+06	2.16486e+06	2.18461e+06	2.19787e+06	2.22025e+06	2.23713e+06	2.24481e+06
che	Switzerland	High SDI	FALSE	All cause deaths	61797.5	62007.5	61552.8	61294	61353.1	63631.7	63130.9	62968.5	62719.7	62530.9	62553.6	61791.8	61958.8	62229.8	61314.1	61259.1	61211.2	61404.1	61625.1	62231.7	62383.2	62591.3	63856.7	64714.5	65206.5	66473.3	66688.4	67360	68558.1	69816.8
syr	Syrian Arab Republic	Middle SDI	FALSE	PM-equivalent emissions	408.758	450.359	432.01	438.236	457.015	474.31	502.331	478.948	514.812	510.349	498.11	507.217	508.736	507.044	527.552	657.505	689.991	728.979	740	645.419	604.53	560.973	449.072	286.291	241.515	234.684	247.231	252.591	250.786	257.517
syr	Syrian Arab Republic	Middle SDI	FALSE	Fossil/industrial fraction	0.978405	0.978112	0.974871	0.972831	0.97191	0.970916	0.970719	0.967327	0.967861	0.965999	0.963309	0.961942	0.959683	0.95706	0.955875	0.962066	0.961918	0.962224	0.961401	0.954858	0.951231	0.948192	0.937197	0.905079	0.891166	0.888037	0.893734	0.895984	0.895321	0.898202
syr	Syrian Arab Republic	Middle SDI	FALSE	Air pollution DALYs	324000	327965	334622	323788	319023	314061	304092	294175	288096	274499	264101	254326	254386	244039	250841	255441	265140	278220	302933	309359	317337	322096	319613	315496	311555	307074	301041	298138	300504	305020
syr	Syrian Arab Republic	Middle SDI	FALSE	Air pollution deaths	7855.25	8083.65	8452.6	8248.37	8298.87	8372.31	8284.95	8198.56	8259.52	8008.79	7815.98	7591.08	7706.02	7476.62	7666.73	7778.2	8054.77	8510.11	9242.27	9508.87	9847.72	10109.4	10201.3	10321.4	10325.3	10221.9	10186.2	10252.4	10438.8	10671.3
syr	Syrian Arab Republic	Middle SDI	FALSE	All cause DALYs	4.77874e+06	4.7754e+06	4.77552e+06	4.6588e+06	4.59529e+06	4.52331e+06	4.41793e+06	4.33282e+06	4.27792e+06	4.15189e+06	3.99949e+06	3.8692e+06	3.83491e+06	3.64589e+06	3.68102e+06	3.79594e+06	3.99474e+06	4.02484e+06	4.15754e+06	4.15783e+06	4.19366e+06	5.01125e+06	7.85974e+06	7.01502e+06	7.28171e+06	6.35182e+06	6.9766e+06	5.60736e+06	4.00626e+06	3.92547e+06
syr	Syrian Arab Republic	Middle SDI	FALSE	All cause deaths	73464.4	73997.6	75251.5	72977.6	72544.2	72154.3	70985.1	70333.3	70865.7	69124.1	66625.4	63927.3	63775.8	60057.7	60409.5	61379.2	64002	65170.9	68321.8	68714.3	70595	85192.2	132282	122297	147737	132347	126590	105947	87177.6	84425
twn	Taiwan (Province of China)	High SDI	TRUE	PM-equivalent emissions	975.784	963.655	1085.33	1036.95	1088.4	1148.06	1088.22	1150.57	1187.27	1271.88	1255.01	1105.51	1145.66	1166.49	1079.01	1026.24	978.184	924.587	839.738	773.656	807.631	776.813	685.333	662.43	649.291	640.176	658.134	631.321	611.191	573.275
twn	Taiwan (Province of China)	High SDI	TRUE	Fossil/industrial fraction	0.970892	0.971688	0.975755	0.974585	0.97606	0.975962	0.974516	0.972026	0.971163	0.971963	0.967469	0.959162	0.959955	0.958733	0.951591	0.950571	0.947268	0.922911	0.907114	0.918753	0.90606	0.906817	0.907963	0.923172	0.922903	0.918182	0.927434	0.924408	0.922159	0.917548
twn	Taiwan (Province of China)	High SDI	TRUE	Air pollution DALYs	256774	249466	247053	243838	245503	249722	254898	252117	254242	254481	259640	261414	259363	258852	262306	265714	259821	256169	253078	247436	247221	260122	265757	272028	287074	288503	286961	279979	285472	291997
twn	Taiwan (Province of China)	High SDI	TRUE	Air pollution deaths	9438.31	9226.94	9209.97	9110.26	9214.42	9436.79	9684.09	9599.57	9768.53	9828.36	10077.7	10235.9	10211.6	10270.9	10458.5	10640.5	10382	10329.3	10280.4	10095.1	10164.6	10767.8	11073.7	11390.5	12137.7	12205.1	12234.1	11990.1	12206.7	12527.5
twn	Taiwan (Province of China)	High SDI	TRUE	All cause DALYs	4.78673e+06	4.80213e+06	4.87187e+06	4.9368e+06	5.03782e+06	5.16018e+06	5.25767e+06	5.22651e+06	5.24622e+06	5.35643e+06	5.32388e+06	5.34692e+06	5.30831e+06	5.3609e+06	5.47733e+06	5.5955e+06	5.58093e+06	5.59343e+06	5.63439e+06	5.66128e+06	5.67753e+06	5.86796e+06	5.89861e+06	5.89268e+06	6.03559e+06	6.0517e+06	6.20162e+06	6.28055e+06	6.36014e+06	6.40987e+06
twn	Taiwan (Province of China)	High SDI	TRUE	All cause deaths	103524	104529	107242	109204	112642	116765	120384	119591	121457	124072	125004	126820	126517	129343	133865	138381	137645	139435	141806	143197	145302	153291	155272	156095	163397	164742	172471	176659	180329	185365
tjk	Tajikistan	Low-middle SDI	FALSE	PM-equivalent emissions	193.59	170.994	141.75	118.02	95.1104	90.7343	90.1618	88.9164	89.4355	85.1941	84.5042	88.8428	94.9085	95.6702	100.779	101.432	106.095	115.943	120.302	124.104	125.337	130.104	134.823	139.496	142.343	146.338	146.042	148.752	154.604	159.349
tjk	Tajikistan	Low-middle SDI	FALSE	Fossil/industrial fraction	0.756184	0.716028	0.648936	0.57145	0.459278	0.423862	0.410416	0.391508	0.383783	0.340301	0.321479	0.343606	0.375136	0.368035	0.388219	0.379516	0.396165	0.436639	0.445791	0.451531	0.445066	0.455613	0.464866	0.473071	0.473921	0.480188	0.49851	0.507396	0.529856	0.546019
tjk	Tajikistan	Low-middle SDI	FALSE	Air pollution DALYs	417630	407713	399891	396706	418402	409666	394390	380348	367844	354811	339784	326912	308287	289055	273889	265809	263841	262607	260519	258912	259183	260325	259657	258144	260874	262752	264482	265240	260817	260265
tjk	Tajikistan	Low-middle SDI	FALSE	Air pollution deaths	7759.16	7807.16	7964.27	8146.97	8741.64	8406.9	8088.05	7982	8050.06	7974.18	7825.09	7721.54	7454.17	7183.67	6979.06	6958.39	6989.86	7057.34	7077.94	7067.64	7218.97	7329.09	7330.77	7276.55	7389.99	7526.99	7665.46	7686.3	7478.12	7454.6
tjk	Tajikistan	Low-middle SDI	FALSE	All cause DALYs	2.63561e+06	2.62419e+06	3.04681e+06	3.80039e+06	2.84922e+06	2.81062e+06	2.92143e+06	2.6904e+06	2.65674e+06	2.54395e+06	2.49064e+06	2.45109e+06	2.40159e+06	2.35591e+06	2.33495e+06	2.34061e+06	2.35341e+06	2.36631e+06	2.37972e+06	2.40508e+06	2.44835e+06	2.47244e+06	2.50071e+06	2.51467e+06	2.56186e+06	2.60331e+06	2.65204e+06	2.67489e+06	2.66906e+06	2.68452e+06
tjk	Tajikistan	Low-middle SDI	FALSE	All cause deaths	41131	41713.4	49221.1	61586.9	48403.7	46512.9	47629.4	44748	45397.1	43986.6	43277	43024.5	42452.4	42021.6	42019.7	42647.8	43069.3	43515.2	43898.1	44317.9	45649.9	46311.3	46626.7	46503.8	47432.6	48413.2	49587.2	49724.5	48750	48702.9
tha	Thailand	Middle SDI	TRUE	PM-equivalent emissions	3079.54	3439.24	3652.03	3709.73	3951.92	4321.85	4271.48	4395.51	3220.01	2565.29	2303.41	2288.74	2347.18	2414.09	2573.61	2599.18	2537.97	2480.59	2483.44	2369.25	2393.22	2412.6	2415.78	2393.62	2405.39	2319.53	2462.56	2441.56	2480.85	2452.43
tha	Thailand	Middle SDI	TRUE	Fossil/industrial fraction	0.826941	0.843278	0.848466	0.851657	0.858576	0.866541	0.863944	0.869611	0.828091	0.768919	0.738065	0.746228	0.736446	0.744447	0.755604	0.753062	0.747135	0.73156	0.723203	0.709098	0.704027	0.713677	0.700116	0.690845	0.682328	0.674705	0.643849	0.658112	0.664622	0.661794
tha	Thailand	Middle SDI	TRUE	Air pollution DALYs	1.25426e+06	1.2625e+06	1.26179e+06	1.26942e+06	1.28734e+06	1.30296e+06	1.31397e+06	1.21659e+06	1.21681e+06	1.26842e+06	1.25023e+06	1.19061e+06	1.19618e+06	1.18674e+06	1.17748e+06	1.16174e+06	1.15711e+06	1.15741e+06	1.15152e+06	1.13307e+06	1.14175e+06	1.1313e+06	1.11114e+06	1.07648e+06	1.06275e+06	1.05809e+06	1.07642e+06	1.08407e+06	1.10969e+06	1.13569e+06
tha	Thailand	Middle SDI	TRUE	Air pollution deaths	36008.1	37040	37575.4	38044.1	38721.4	39211.1	39626.4	36712.4	37353.8	39364.7	38718.7	36374.7	36786.1	36779.3	37489.3	37722.1	37782.9	38034	38214.8	37935.3	38739	38499.2	37755.7	36755	36475.8	36698.3	37626.9	38259.8	39639.4	40877.7
tha	Thailand	Middle SDI	TRUE	All cause DALYs	1.70532e+07	1.73953e+07	1.77109e+07	1.82757e+07	1.90497e+07	1.98436e+07	2.04775e+07	1.98652e+07	1.98977e+07	2.05396e+07	2.04886e+07	2.00477e+07	2.01604e+07	2.00073e+07	2.00097e+07	1.90762e+07	1.88352e+07	1.88181e+07	1.8716e+07	1.84516e+07	1.85463e+07	1.865e+07	1.87799e+07	1.89114e+07	1.91808e+07	1.94595e+07	1.99153e+07	2.0084e+07	2.03407e+07	2.05693e+07
tha	Thailand	Middle SDI	TRUE	All cause deaths	303768	315435	324904	337626	354506	370696	384583	368975	377253	398696	398653	383788	389451	388637	396202	383717	381337	382439	385055	386099	396187	401358	405964	412770	424855	438127	458026	470343	484772	497502
tgo	Togo	Low SDI	FALSE	PM-equivalent emissions	105.797	106.982	105.842	108.765	112.394	112.821	117.903	116.776	119.879	122.765	126.806	125.307	125.204	126.251	127.241	127.871	130.023	128.802	129.891	145.865	144.032	139.499	138.607	140.534	142.984	145.744	148.074	150.318	151.601	152.74
tgo	Togo	Low SDI	FALSE	Fossil/industrial fraction	0.142006	0.139383	0.122978	0.113377	0.139021	0.134443	0.165212	0.148625	0.163568	0.173287	0.167844	0.160099	0.166156	0.18478	0.183698	0.179702	0.181929	0.185528	0.197168	0.271716	0.274135	0.244852	0.23408	0.238176	0.244817	0.251722	0.256501	0.260774	0.26776	0.273891
tgo	Togo	Low SDI	FALSE	Air pollution DALYs	321174	323479	326038	331523	335613	338031	338914	339292	340303	339731	341560	342606	348600	347921	345429	345923	346869	347871	352648	356825	355793	353716	347772	340932	336849	333044	329288	323982	315800	311082
tgo	Togo	Low SDI	FALSE	Air pollution deaths	5057.99	5111.96	5172.16	5271.45	5365.97	5443.02	5506.68	5571.61	5640.75	5665.1	5742.37	5805.8	5939.37	6003.92	6016.27	6087.95	6161.02	6247.47	6412.39	6547.29	6609.43	6640.03	6617.53	6585.14	6596.84	6657.66	6689.89	6719.74	6686.92	6712.51
tgo	Togo	Low SDI	FALSE	All cause DALYs	2.96426e+06	3.01643e+06	3.05872e+06	3.13151e+06	3.2043e+06	3.26895e+06	3.3568e+06	3.47523e+06	3.53738e+06	3.59558e+06	3.68611e+06	3.77277e+06	3.84886e+06	3.90454e+06	3.94058e+06	4.00693e+06	3.99178e+06	4.03367e+06	4.04759e+06	4.02272e+06	3.96905e+06	3.91029e+06	3.86563e+06	3.82459e+06	3.78119e+06	3.72282e+06	3.65144e+06	3.56722e+06	3.48391e+06	3.42906e+06
tgo	Togo	Low SDI	FALSE	All cause deaths	39217	40018.6	40732.1	41914.2	43184.2	44373.5	45926.1	47954	49254.7	50442.9	52099.1	53672.3	55123.2	56313.5	57026.1	58211.1	58104.6	59056.9	59560.1	59332.1	58644.5	57887	57516.9	57272.6	57050.8	56600.8	55788.6	54820	53915.5	53555.2
ton	Tonga	Middle SDI	FALSE	PM-equivalent emissions	1.95439	2.13985	1.91778	2.01681	2.18756	2.22368	2.14906	2.30203	2.31425	2.50173	2.42082	2.43662	2.61327	2.7563	2.65718	2.71166	2.68602	2.67522	2.68459	2.59878	2.57445	2.74005	2.88862	2.44227	2.40874	2.52888	2.50851	2.5519	2.589	2.65606
ton	Tonga	Middle SDI	FALSE	Fossil/industrial fraction	0.713417	0.732992	0.697178	0.707934	0.723884	0.724339	0.690164	0.707002	0.703787	0.72206	0.71079	0.709958	0.728137	0.742261	0.732323	0.737413	0.734239	0.729294	0.728808	0.719225	0.714948	0.743619	0.759626	0.719517	0.716841	0.733711	0.735594	0.742002	0.748029	0.756583
ton	Tonga	Middle SDI	FALSE	Air pollution DALYs	2175.92	2134.12	2082.37	2070.61	2048.83	2006.3	1985.51	1984.4	2022.25	2073.01	2035.49	1982.93	1962.09	1940.9	1883.83	1809.81	1806.11	1814.32	1821.9	1815.72	1804.3	1777.29	1738.98	1700.32	1658.46	1621.17	1588.15	1550.66	1511.56	1462.5
ton	Tonga	Middle SDI	FALSE	Air pollution deaths	64.4778	63.7484	62.5288	62.8281	62.6034	61.0959	61.0267	62.171	64.8711	67.0873	65.835	64.0486	63.6907	63.3044	61.3462	58.4113	58.6267	59.415	60.167	60.5047	60.6185	60.2316	59.3987	58.5137	57.4209	56.4067	55.4401	54.2457	53.1422	51.5958
ton	Tonga	Middle SDI	FALSE	All cause DALYs	26234.8	26078.5	25910.3	26137	26325.5	26286	26447.4	26839.8	27560.6	28214.9	28231.3	28139.4	28302.5	28462.6	28272.9	27748.1	27843.6	28031.2	28203.6	32767.6	28219.4	28125	28014.1	27897.6	27834.6	27653.1	27557	27453.2	27338.6	27249
ton	Tonga	Middle SDI	FALSE	All cause deaths	509.296	510.909	510.964	522.265	531.867	531.818	541.489	560.46	591.429	617.331	619.262	616.181	623.222	630.215	623.369	601.935	607.097	617.287	626.989	717.48	638.709	642.123	645.145	648.209	651.904	653.01	654.628	655.63	656.719	657.968
tto	Trinidad and Tobago	Middle SDI	FALSE	PM-equivalent emissions	38.848	38.9596	40.0299	39.4795	40.711	41.3718	37.8475	39.1792	39.6641	61.7301	63.7761	67.5151	96.213	104.343	109.794	96.8828	91.4193	94.1652	85.9653	86.1536	80.0205	81.7794	90.3509	98.0052	93.8695	90.332	91.183	88.0838	83.7308	80.1549
tto	Trinidad and Tobago	Middle SDI	FALSE	Fossil/industrial fraction	0.765665	0.771595	0.778737	0.774728	0.773596	0.784258	0.762969	0.769861	0.771036	0.853695	0.86913	0.878389	0.909035	0.919144	0.925034	0.915288	0.913899	0.918205	0.911709	0.909942	0.904169	0.903994	0.910741	0.915326	0.908932	0.905438	0.906363	0.903113	0.898075	0.893528
tto	Trinidad and Tobago	Middle SDI	FALSE	Air pollution DALYs	18900.8	18889.3	19293.7	20233.8	20870.3	20335.5	21253.1	20665	21711	22074	21145.8	21057.8	20126.9	20244.7	19457.1	18960.4	18440.2	18604.3	19492	19001.3	18999.4	19064.3	19155.7	20332.7	21369.9	22196.8	22602.5	22715.9	23371.3	24357.2
tto	Trinidad and Tobago	Middle SDI	FALSE	Air pollution deaths	645.841	651.043	671.412	708.08	732.934	710.167	744.298	721.814	762.472	776.135	734.45	732.535	702.398	711.034	678.56	659.996	641.903	647.438	682.152	660.109	662.224	659.528	661.626	712.979	757.069	792.151	816.784	824.751	852.9	892.326
tto	Trinidad and Tobago	Middle SDI	FALSE	All cause DALYs	376740	375951	382854	394079	402745	397923	409575	402748	416262	426210	422270	427983	422886	431428	430071	432272	427853	431211	446748	436655	431745	423813	418113	425932	432126	437453	445343	450898	456081	461384
tto	Trinidad and Tobago	Middle SDI	FALSE	All cause deaths	8308.99	8353.97	8617.8	9024.07	9316.99	9099.01	9479.65	9211.22	9631.35	9895.23	9603.56	9754.6	9628.54	9950.53	9855.09	9865.49	9711.6	9800.64	10290.6	9954.44	9890.57	9667.54	9511.01	9906.84	10238.2	10532.4	10961.2	11233.5	11498.3	11765.1
tun	Tunisia	Middle SDI	FALSE	PM-equivalent emissions	165.573	186.265	183.583	187.231	169.526	161.455	167.111	170.887	174.328	178.801	184.726	185.629	185.422	183.657	190.637	190.438	200.214	208.834	199.167	197.344	187.165	174.581	179.712	179.168	165.222	173.865	160.989	163.931	168.248	171.532
tun	Tunisia	Middle SDI	FALSE	Fossil/industrial fraction	0.859438	0.871564	0.867097	0.867188	0.847599	0.83388	0.835199	0.835206	0.834879	0.835416	0.836075	0.832311	0.82673	0.819426	0.820287	0.814215	0.817733	0.82082	0.807316	0.78872	0.8141	0.802807	0.810496	0.812552	0.800168	0.811683	0.798616	0.804844	0.811279	0.816274
tun	Tunisia	Middle SDI	FALSE	Air pollution DALYs	160680	159814	158855	158624	156397	158894	158856	163199	167303	170847	172369	172175	170810	168869	167241	167281	169449	172700	177064	181232	185374	187078	186622	186735	186282	186519	186653	188164	192160	197299
tun	Tunisia	Middle SDI	FALSE	Air pollution deaths	4355.65	4497.22	4582.59	4686.64	4707.63	4947.65	5059.97	5303.81	5548.47	5748.85	5864.33	5912.92	5914.49	5899.52	5895.81	5935.34	6055.37	6210.86	6411.18	6595.42	6780.33	6863.89	6907.47	6958.93	6981.53	7028.31	7065.63	7154.95	7326.4	7529.55
tun	Tunisia	Middle SDI	FALSE	All cause DALYs	2.67809e+06	2.66995e+06	2.65722e+06	2.64826e+06	2.61786e+06	2.61748e+06	2.58542e+06	2.56836e+06	2.5513e+06	2.53844e+06	2.5399e+06	2.54282e+06	2.54856e+06	2.56528e+06	2.55695e+06	2.56158e+06	2.5747e+06	2.58943e+06	2.60688e+06	2.6353e+06	2.66297e+06	2.70652e+06	2.69697e+06	2.72224e+06	2.74588e+06	2.77274e+06	2.7933e+06	2.82024e+06	2.84862e+06	2.87124e+06
tun	Tunisia	Middle SDI	FALSE	All cause deaths	43091.4	44313.8	44988.2	45746.4	45813.6	47339.9	47581.8	48176.8	48777.1	49191.9	49777.4	50378.8	51046.9	51966.9	52382.7	53020.7	53792.6	54605.2	55544.8	56622.9	57734.8	59002.7	59537.7	60734.4	61888.8	63147.6	64308.2	65597.3	66727	67618.3
tur	Turkey	High-middle SDI	TRUE	PM-equivalent emissions	2657.87	2731.78	2856	2850	2897.9	3027.36	3209.96	3308.43	3441.08	3403.28	3519.82	3254.99	3136.67	3026.72	2969.54	3329.08	3457.2	3718.18	3637.55	3545.57	3274.88	3396.45	3298.51	3070.09	3394.09	3251.94	3572.61	3800.72	3827.34	3774.45
tur	Turkey	High-middle SDI	TRUE	Fossil/industrial fraction	0.935245	0.936869	0.939807	0.939942	0.94098	0.943958	0.947271	0.949086	0.951304	0.951853	0.955204	0.953082	0.9526	0.952611	0.952646	0.958807	0.961277	0.964794	0.965251	0.96541	0.963155	0.970852	0.971597	0.971759	0.976459	0.977872	0.980806	0.982666	0.983009	0.982995
tur	Turkey	High-middle SDI	TRUE	Air pollution DALYs	1.56827e+06	1.51182e+06	1.4624e+06	1.42106e+06	1.3956e+06	1.36784e+06	1.31759e+06	1.28359e+06	1.24111e+06	1.18897e+06	1.11601e+06	1.08576e+06	1.06129e+06	1.02523e+06	990962	961028	959774	977969	1.0157e+06	1.08352e+06	1.11109e+06	1.11695e+06	1.12243e+06	1.14406e+06	1.16583e+06	1.171e+06	1.14903e+06	1.12265e+06	1.11535e+06	1.12178e+06
tur	Turkey	High-middle SDI	TRUE	Air pollution deaths	38961.3	38332.6	37838.9	37605.2	37600.5	37426.8	36550.3	36432	35778.1	34348.6	32513	32848.5	33480.2	33151	32664	32208	33293.9	34973	37396	40409.7	41818.7	42630.3	43237.2	44442.2	45277.9	45334.7	44749.7	44077.3	43717.9	44166.5
tur	Turkey	High-middle SDI	TRUE	All cause DALYs	2.35324e+07	2.30538e+07	2.28703e+07	2.24207e+07	2.24034e+07	2.20706e+07	2.15707e+07	2.11012e+07	2.06752e+07	2.12508e+07	1.94663e+07	1.90371e+07	1.86467e+07	1.83388e+07	1.79722e+07	1.7649e+07	1.74412e+07	1.73564e+07	1.7396e+07	1.77673e+07	1.80004e+07	1.81121e+07	1.82708e+07	1.86576e+07	1.90505e+07	1.92262e+07	1.94956e+07	1.95085e+07	1.96026e+07	1.96293e+07
tur	Turkey	High-middle SDI	TRUE	All cause deaths	390969	386439	386361	382975	386214	382902	375073	371561	365606	370544	336051	337930	342026	339522	334721	331176	337926	347471	361299	379421	390326	398403	405087	418242	428800	431529	440850	446570	449289	454742
tkm	Turkmenistan	Middle SDI	TRUE	PM-equivalent emissions	380.74	405.071	353.694	268.237	261.361	248.232	247.507	230.595	260.95	277.509	265.993	275.657	286.368	312.147	305.161	308.333	304.484	321.61	323.045	323.056	343.106	369.709	374.641	391.459	409.814	432.175	415.877	425.909	450.582	482.928
tkm	Turkmenistan	Middle SDI	TRUE	Fossil/industrial fraction	0.956033	0.957643	0.950449	0.933037	0.927991	0.922577	0.922489	0.91433	0.922415	0.924108	0.919225	0.921913	0.921937	0.928651	0.926759	0.927375	0.925882	0.927971	0.927162	0.930889	0.934073	0.938148	0.938638	0.940238	0.943029	0.945886	0.946126	0.947963	0.951139	0.954589
tkm	Turkmenistan	Middle SDI	TRUE	Air pollution DALYs	109559	112308	114111	122745	125601	124343	127107	127428	125417	120247	115785	112446	109410	105114	102959	104168	104791	106852	107817	102859	102033	105408	108301	113234	116849	118617	117300	114990	114848	114525
tkm	Turkmenistan	Middle SDI	TRUE	Air pollution deaths	2456.44	2584.19	2676.63	3016.19	3148.62	3145.03	3266.11	3274.38	3227.62	3124.47	3034.92	2990.14	2985.58	2929.04	2926.81	3009.92	3042.33	3105.22	3118.26	2943.87	2929.96	3062.72	3175.45	3347.13	3489.04	3591.38	3587.49	3546.23	3593.72	3607.96
tkm	Turkmenistan	Middle SDI	TRUE	All cause DALYs	1.68455e+06	1.71251e+06	1.69935e+06	1.7401e+06	1.73818e+06	1.7123e+06	1.72588e+06	1.71981e+06	1.69472e+06	1.64105e+06	1.57617e+06	1.55421e+06	1.56169e+06	1.56535e+06	1.59556e+06	1.63493e+06	1.62986e+06	1.62251e+06	1.60365e+06	1.53766e+06	1.52164e+06	1.53315e+06	1.54085e+06	1.56324e+06	1.57816e+06	1.58445e+06	1.58291e+06	1.58129e+06	1.58741e+06	1.58987e+06
tkm	Turkmenistan	Middle SDI	TRUE	All cause deaths	27483.5	28454	28590.6	30579.4	31006.3	30554.1	31207	31032.4	30437.6	29394.6	28293.6	28136.3	28935.9	29587.4	30814.2	32207.3	32193	31959.9	31212.8	29090.6	28601.8	29206.1	29645.1	30552.7	31319.4	31920	32259.7	32523.3	33249.9	33620.3
uga	Uganda	Low SDI	FALSE	PM-equivalent emissions	490.167	491.328	495.556	501.678	524.772	544.037	537.293	536.181	547.926	556.587	581.126	580.916	580.947	585.719	591.212	603.943	614.049	630.647	655.381	661.904	644.682	663.565	673.131	678.109	684.969	694.019	707.035	722.622	726.038	730.152
uga	Uganda	Low SDI	FALSE	Fossil/industrial fraction	0.0978544	0.101687	0.102688	0.104126	0.0994034	0.101195	0.104903	0.107957	0.11386	0.11689	0.117238	0.124408	0.128416	0.134639	0.13895	0.146075	0.151297	0.157537	0.182491	0.185771	0.196752	0.201782	0.204367	0.203169	0.209585	0.209769	0.2124	0.21391	0.217933	0.22264
uga	Uganda	Low SDI	FALSE	Air pollution DALYs	1.51164e+06	1.55737e+06	1.58921e+06	1.64232e+06	1.67654e+06	1.7151e+06	1.75595e+06	1.79129e+06	1.82058e+06	1.83083e+06	1.84499e+06	1.85904e+06	1.83028e+06	1.78763e+06	1.8155e+06	1.81438e+06	1.79091e+06	1.75536e+06	1.69901e+06	1.66333e+06	1.67181e+06	1.66216e+06	1.66083e+06	1.70852e+06	1.72688e+06	1.66598e+06	1.69628e+06	1.56953e+06	1.52878e+06	1.47687e+06
uga	Uganda	Low SDI	FALSE	Air pollution deaths	24131.8	24990	25581.1	26480.1	27155.7	27844.8	28546	29090.6	29607.1	29846.7	30157.2	30364.6	30025.1	29482.1	29803.4	29743.6	29455.7	28998.6	28286.5	27900.1	28041	28065.7	28276.3	29106.2	29539.4	28976.1	29519.3	28178.7	28036.8	27677.4
uga	Uganda	Low SDI	FALSE	All cause DALYs	2.09072e+07	2.1594e+07	2.20594e+07	2.26349e+07	2.29975e+07	2.34348e+07	2.39392e+07	2.42993e+07	2.46095e+07	2.47765e+07	2.49032e+07	2.47915e+07	2.46962e+07	2.44322e+07	2.41649e+07	2.34381e+07	2.25919e+07	2.2003e+07	2.14229e+07	2.09844e+07	2.06558e+07	1.99485e+07	1.92535e+07	1.87387e+07	1.84971e+07	1.82321e+07	1.8638e+07	1.77654e+07	1.72962e+07	1.70692e+07
uga	Uganda	Low SDI	FALSE	All cause deaths	291293	302526	310378	319465	325694	332285	339626	344537	349057	351642	353476	351281	349438	345803	341863	330144	316520	308228	300077	293635	288913	279685	270315	262790	258970	255179	260553	249953	244654	242798
ukr	Ukraine	High-middle SDI	TRUE	PM-equivalent emissions	8394.01	7356.66	6165.57	5073.35	4011.44	3719.85	2647.27	2532.09	2410.2	2210.22	2133.78	2031.78	2079.7	2337.6	2054.85	1934.25	2157.13	2235.68	2239.62	2045.97	2115.61	2287.44	2343.42	2353.77	2170.44	1837.52	1756.4	1399.41	1270.6	1077.44
ukr	Ukraine	High-middle SDI	TRUE	Fossil/industrial fraction	0.974123	0.971175	0.966591	0.960101	0.950347	0.948657	0.926828	0.923682	0.923283	0.919009	0.915645	0.911936	0.91335	0.918435	0.905217	0.899598	0.915612	0.918375	0.916697	0.9053	0.906757	0.913362	0.915447	0.91528	0.908829	0.891212	0.883872	0.859181	0.849395	0.830579
ukr	Ukraine	High-middle SDI	TRUE	Air pollution DALYs	1.5194e+06	1.59267e+06	1.65954e+06	1.72168e+06	1.77666e+06	1.87457e+06	1.80244e+06	1.69848e+06	1.56256e+06	1.58379e+06	1.60902e+06	1.57383e+06	1.59693e+06	1.5833e+06	1.60671e+06	1.61573e+06	1.52796e+06	1.54651e+06	1.52184e+06	1.34606e+06	1.27683e+06	1.20829e+06	1.18159e+06	1.1435e+06	1.04354e+06	1.22333e+06	1.09621e+06	1.01807e+06	1.03216e+06	1.02295e+06
ukr	Ukraine	High-middle SDI	TRUE	Air pollution deaths	66752.1	69962.3	72748.4	75719.6	77675.8	81062.8	77888.8	73755.7	68375.2	69310.8	70211.7	68623.9	69540.6	69086	69769.6	70433	67150	67923	67265.6	61024.4	58893.3	55929.1	54700	52705	47977.6	54397	48676.5	45427.2	46431.5	46129.1
ukr	Ukraine	High-middle SDI	TRUE	All cause DALYs	2.15725e+07	2.24288e+07	2.32635e+07	2.39889e+07	2.48176e+07	2.60291e+07	2.55098e+07	2.46206e+07	2.34784e+07	2.39939e+07	2.45026e+07	2.41845e+07	2.43437e+07	2.41437e+07	2.44199e+07	2.46248e+07	2.37507e+07	2.41179e+07	2.3843e+07	2.16989e+07	2.08591e+07	2.01926e+07	2.01341e+07	1.99097e+07	1.96825e+07	2.25419e+07	2.19843e+07	2.17495e+07	2.17666e+07	2.15668e+07
ukr	Ukraine	High-middle SDI	TRUE	All cause deaths	619939	654838	688215	720951	748941	788936	770987	743319	705074	725948	744225	732520	741222	738595	748817	760808	732837	747780	745427	682457	664460	642840	644224	637757	615404	714985	694408	690449	702356	698663
are	United Arab Emirates	High-middle SDI	TRUE	PM-equivalent emissions	1251.14	1707.56	1709.97	1725.84	1882.06	1884.95	1884.99	1940.24	1913.97	1834.52	1794.05	1892.65	1822.11	2006.68	2192.27	2335.69	2462.32	2449.02	2442.46	2093.15	2339.41	2288.04	2278.15	2257.52	2357.19	2515.03	2683.71	2486.67	2673.93	2472.4
are	United Arab Emirates	High-middle SDI	TRUE	Fossil/industrial fraction	0.999843	0.999873	0.999695	0.99972	0.99975	0.999739	0.999759	0.999755	0.999745	0.999722	0.999701	0.999703	0.999667	0.999676	0.999633	0.999603	0.999567	0.999497	0.999429	0.999267	0.999297	0.999255	0.99924	0.99924	0.999276	0.999325	0.999368	0.99932	0.999369	0.999321
are	United Arab Emirates	High-middle SDI	TRUE	Air pollution DALYs	24984.2	26006.8	27268.2	28647.9	30120.7	31501.7	32746.2	34039.6	35331.1	36937.6	38551.2	39678.3	41055.6	42535	44379.9	46130.8	49105.6	54202.2	60280.2	67374.4	73303.4	79972.4	87846.8	96707.3	104332	113324	120905	129003	137645	147250
are	United Arab Emirates	High-middle SDI	TRUE	Air pollution deaths	602.326	636.495	675.645	718.552	770.721	810.487	845.631	878.503	907.926	945.572	991.387	1013.6	1041.08	1085.8	1147.61	1187.32	1235.22	1298.5	1388.79	1514.53	1635.19	1779.13	1956.44	2143.41	2266.28	2487.27	2678.61	2886.6	3110.62	3360.69
are	United Arab Emirates	High-middle SDI	TRUE	All cause DALYs	435252	450505	468892	488025	508611	528870	549307	577662	599949	631436	659714	691691	726999	760575	798583	828789	916705	1.08742e+06	1.31026e+06	1.50889e+06	1.57826e+06	1.63901e+06	1.69857e+06	1.75924e+06	1.81988e+06	1.88002e+06	1.94041e+06	2.00482e+06	2.0709e+06	2.14048e+06
are	United Arab Emirates	High-middle SDI	TRUE	All cause deaths	5749.52	5990.28	6272.57	6572.86	6929.44	7212.72	7476.8	7838.55	8048.21	8419.4	8773.77	9093.74	9465.69	9917.84	10519	10857.6	11638.3	12980.9	14735.4	16606	17622.6	18623	19696.1	20762	21597.9	22923.5	24305.9	25820	27412.4	29113
gbr	United Kingdom	High SDI	TRUE	PM-equivalent emissions	6148.01	5926.1	5833.77	5399.55	4831.47	4455.66	4077.07	3616.66	3526.64	2984.92	2865.05	2751.68	2526.15	2509.45	2362.71	2257.72	2225.15	2099.3	1946.93	1710.3	1676.71	1627.04	1625.98	1529.26	1396.39	1302.43	1191.01	1160.07	1116.61	1073.31
gbr	United Kingdom	High SDI	TRUE	Fossil/industrial fraction	0.995966	0.995853	0.995475	0.995363	0.994506	0.994052	0.994058	0.994126	0.993872	0.993061	0.992606	0.989548	0.98991	0.988705	0.987507	0.984923	0.983203	0.980375	0.979232	0.975291	0.971513	0.971645	0.96927	0.960611	0.950346	0.943413	0.934548	0.930819	0.92915	0.927301
gbr	United Kingdom	High SDI	TRUE	Air pollution DALYs	866393	840406	811233	795762	759851	741344	713203	682492	660528	636264	599954	566134	548210	526624	495899	474387	457559	444966	431528	414649	399844	381186	362935	345388	327321	318888	315325	313666	321086	319546
gbr	United Kingdom	High SDI	TRUE	Air pollution deaths	42075.1	41124.5	39964.1	39507.9	37817.2	37102	35748.5	34172.7	33031.4	31811.6	29911.4	28123.3	27304.5	26156	24404.7	23184.3	22165.9	21494.2	20712	19740.7	18976	18119	17410.3	16565.9	15585.5	15097.9	14769.8	14598.1	15114.1	15026.2
gbr	United Kingdom	High SDI	TRUE	All cause DALYs	1.99449e+07	1.97964e+07	1.96246e+07	1.96382e+07	1.94271e+07	1.94254e+07	1.93286e+07	1.92182e+07	1.92083e+07	1.91909e+07	1.89524e+07	1.87713e+07	1.87721e+07	1.87529e+07	1.85363e+07	1.84601e+07	1.845e+07	1.84437e+07	1.84547e+07	1.83367e+07	1.82996e+07	1.82789e+07	1.8367e+07	1.85169e+07	1.85904e+07	1.8821e+07	1.89852e+07	1.91375e+07	1.9475e+07	1.97123e+07
gbr	United Kingdom	High SDI	TRUE	All cause deaths	637687	634905	631874	637209	627085	629830	625816	620279	619690	619588	606554	596116	597273	594897	580010	572546	567823	566076	565993	558338	558593	561171	570978	578700	578559	587289	589437	594166	612292	621815
tza	United Republic of Tanzania	Low SDI	TRUE	PM-equivalent emissions	1218.54	1217.96	1226.43	1250.28	1241.46	1235.57	1253.12	1251.92	1296.89	1321.45	1370.04	1356.74	1379.79	1374.26	1438.35	1485.14	1476.36	1490.28	1465.35	1458.76	1454.98	1491.62	1521.88	1551.5	1550.63	1568.13	1550.12	1562.57	1571.05	1575.38
tza	United Republic of Tanzania	Low SDI	TRUE	Fossil/industrial fraction	0.0758359	0.0766338	0.0776594	0.0781969	0.0808005	0.0911033	0.0882363	0.090165	0.0873441	0.0917545	0.0941201	0.0972659	0.101294	0.106693	0.123199	0.118229	0.12448	0.11665	0.117469	0.117497	0.12545	0.142464	0.154734	0.166364	0.160789	0.165934	0.151968	0.154302	0.159234	0.161901
tza	United Republic of Tanzania	Low SDI	TRUE	Air pollution DALYs	2.93226e+06	2.91672e+06	2.92102e+06	2.92524e+06	2.93281e+06	2.92714e+06	2.92466e+06	2.9241e+06	2.91392e+06	2.87461e+06	2.80611e+06	2.7459e+06	2.73197e+06	2.74067e+06	2.71627e+06	2.66206e+06	2.67607e+06	2.67894e+06	2.64489e+06	2.67006e+06	2.6384e+06	2.62217e+06	2.64248e+06	2.61246e+06	2.53514e+06	2.56512e+06	2.51541e+06	2.44855e+06	2.38112e+06	2.33896e+06
tza	United Republic of Tanzania	Low SDI	TRUE	Air pollution deaths	44319.8	44390.9	44737.3	45105.8	45503.4	45716.3	45897.7	46181.6	46443.8	46129.5	45380.9	44692.2	44734.7	45125.3	45125	44706.6	45190.6	45504.3	45376.9	45902.7	45745.4	45900.9	46632.2	46690.5	46052.2	46685.4	46422.6	45992.9	45633.5	45491
tza	United Republic of Tanzania	Low SDI	TRUE	All cause DALYs	2.45961e+07	2.54219e+07	2.64148e+07	2.71247e+07	2.7972e+07	2.86824e+07	2.92958e+07	2.99446e+07	3.03432e+07	3.03764e+07	3.03001e+07	3.00899e+07	2.9844e+07	2.95031e+07	2.92282e+07	2.8966e+07	2.85671e+07	2.78742e+07	2.73066e+07	2.69604e+07	2.65416e+07	2.62129e+07	2.56652e+07	2.50579e+07	2.46194e+07	2.43846e+07	2.42392e+07	2.4024e+07	2.3546e+07	2.32884e+07
tza	United Republic of Tanzania	Low SDI	TRUE	All cause deaths	337922	351972	368516	381935	397118	410184	421983	433473	442071	445023	445730	443970	441854	438632	436347	433918	428517	417081	407709	403237	397966	394068	385553	375213	368377	365385	364319	362297	356695	354351
usa	United States of America	High SDI	TRUE	PM-equivalent emissions	42232.7	41612.4	41512.9	40318.2	39638.5	37160.9	36567.7	36479.5	36237.4	34588.7	33883.1	31920.7	30617.5	29639.5	29950.3	29849.6	28510	27049.2	24682.1	22353.5	20904	19456	17105.9	16587.3	15859.4	14804.9	14006.8	13331.9	13041.8	12457.1
usa	United States of America	High SDI	TRUE	Fossil/industrial fraction	0.953319	0.949848	0.947126	0.954259	0.954617	0.952469	0.950154	0.952182	0.953058	0.94702	0.944526	0.945039	0.944192	0.9407	0.939208	0.938325	0.935974	0.934072	0.927335	0.926282	0.916864	0.912243	0.904306	0.896573	0.890827	0.886992	0.885529	0.882055	0.880526	0.876029
usa	United States of America	High SDI	TRUE	Air pollution DALYs	2.46286e+06	2.42822e+06	2.39171e+06	2.41047e+06	2.40204e+06	2.39923e+06	2.36527e+06	2.33947e+06	2.33089e+06	2.32898e+06	2.29982e+06	2.27069e+06	2.24644e+06	2.1951e+06	2.1203e+06	2.09604e+06	2.04643e+06	1.95492e+06	1.86883e+06	1.77737e+06	1.70108e+06	1.67771e+06	1.62528e+06	1.57652e+06	1.52138e+06	1.4877e+06	1.43055e+06	1.38094e+06	1.40118e+06	1.42146e+06
usa	United States of America	High SDI	TRUE	Air pollution deaths	103744	103090	102384	104375	105019	105733	104753	104005	104228	104578	102989	101326	99743.6	96526	92315.5	90805.6	88049.9	83247.6	78860.1	74243.3	70979.2	70549.7	68292	66169.6	63519.3	62230.7	59832.4	57764.8	59030	60229.2
usa	United States of America	High SDI	TRUE	All cause DALYs	8.34881e+07	8.38286e+07	8.40248e+07	8.53586e+07	8.60096e+07	8.66049e+07	8.61834e+07	8.58162e+07	8.63718e+07	8.74906e+07	8.83749e+07	8.95243e+07	9.03291e+07	9.1035e+07	9.10729e+07	9.24107e+07	9.29826e+07	9.35629e+07	9.43998e+07	9.50013e+07	9.5442e+07	9.67812e+07	9.79405e+07	9.93985e+07	1.01067e+08	1.03194e+08	1.05569e+08	1.06879e+08	1.08913e+08	1.11074e+08
usa	United States of America	High SDI	TRUE	All cause deaths	2.13245e+06	2.15289e+06	2.17087e+06	2.2375e+06	2.27042e+06	2.3064e+06	2.30466e+06	2.29942e+06	2.32341e+06	2.36643e+06	2.38837e+06	2.41199e+06	2.4304e+06	2.43541e+06	2.41022e+06	2.44211e+06	2.44094e+06	2.4409e+06	2.46211e+06	2.46493e+06	2.47465e+06	2.51963e+06	2.55192e+06	2.59516e+06	2.64096e+06	2.70549e+06	2.76525e+06	2.78971e+06	2.87052e+06	2.94646e+06
vir	United States Virgin Islands	High-middle SDI	FALSE	PM-equivalent emissions	2.92607	3.04395	3.06809	3.06513	3.05017	3.15825	3.14664	3.09982	3.21244	3.26311	3.11513	3.07725	3.01698	3.05252	3.11401	2.94993	2.86428	2.90737	2.8015	2.73759	3.01584	1.98635	2.50273	2.421	2.30508	2.30231	2.32583	1.8934	1.94178	1.90102
vir	United States Virgin Islands	High-middle SDI	FALSE	Fossil/industrial fraction	0.931057	0.934315	0.932523	0.92997	0.930514	0.933274	0.931612	0.930112	0.929992	0.927879	0.931435	0.930897	0.927192	0.930555	0.928442	0.930502	0.928606	0.930735	0.936449	0.93044	0.936186	0.910698	0.934833	0.937183	0.93387	0.933137	0.936342	0.924101	0.926516	0.92546
vir	United States Virgin Islands	High-middle SDI	FALSE	Air pollution DALYs	614.423	604.856	605.569	610.215	619.454	610.172	610.571	600.663	590.027	585.826	572.779	563.883	542.547	525.954	511.829	508.166	528.252	612.108	628.739	644.43	660.411	678.381	701.061	722.83	743.762	764.75	769.212	783.095	799.563	818.317
vir	United States Virgin Islands	High-middle SDI	FALSE	Air pollution deaths	19.8325	19.7325	19.9793	20.339	20.8659	20.6244	20.7795	20.4825	20.1657	20.1661	19.8047	19.6272	18.9812	18.4603	17.9596	17.8921	18.7762	22.2821	23.0204	23.685	24.3772	25.1767	26.1414	27.0896	28.0363	29.0416	29.4499	30.2499	31.1522	32.1103
vir	United States Virgin Islands	High-middle SDI	FALSE	All cause DALYs	30734	30812.6	31028.9	31422.8	32056.7	32754	32792.7	32852.8	33095.7	33989.5	34288.6	34731.1	34817	34960.7	35253.4	35448.6	36117.4	37884.1	38264.6	38656.5	39085.4	39285.5	39661.9	39926.9	40191	40601.4	40417.1	40925.4	40766.2	40856.5
vir	United States Virgin Islands	High-middle SDI	FALSE	All cause deaths	647.085	653.691	667.643	686.782	712.432	725.92	737.127	744.572	757.878	790.93	806.85	827.72	837.974	850.439	867.762	882.948	921.058	1042.73	1066.26	1088.83	1112.39	1129.38	1151.92	1170.82	1190.37	1215.61	1221.32	1249.51	1261.56	1279.02
ury	Uruguay	High-middle SDI	FALSE	PM-equivalent emissions	111.184	125.224	131.734	130.811	119.04	150.851	153.361	151.301	147.58	165.34	142.131	139.853	134.159	134.118	150.827	152.069	155.753	153.357	199.242	204.36	188.11	193.056	202.755	181.972	170.244	171.15	170.435	164.215	163.972	164.335
ury	Uruguay	High-middle SDI	FALSE	Fossil/industrial fraction	0.834869	0.849751	0.853664	0.855185	0.848743	0.885665	0.892473	0.890957	0.895875	0.906323	0.894923	0.893048	0.888793	0.885859	0.895797	0.896067	0.892771	0.885212	0.845879	0.842677	0.792408	0.798831	0.807264	0.78401	0.737928	0.701826	0.695405	0.680606	0.685777	0.691692
ury	Uruguay	High-middle SDI	FALSE	Air pollution DALYs	31559.8	29240.4	29284.3	29391.1	28336	27955.9	26961.1	25826.2	25567.5	24696	23378.1	22334	21546.5	20915.7	19844.4	19081.9	18418.7	18824.3	17998.8	17686	17770	18157.4	18205.7	18161.6	17950.7	18060.7	17648.5	17129.4	17316.5	17425.8
ury	Uruguay	High-middle SDI	FALSE	Air pollution deaths	1297.38	1214.29	1221.63	1226.38	1184.2	1177.32	1144.68	1106.93	1113.53	1089.18	1028.24	987.463	958.284	936.809	899.733	868.899	843.333	869.927	825.796	811.684	818.806	853.003	858.759	853.213	843.327	848.983	829.406	800.995	813.358	819.838
ury	Uruguay	High-middle SDI	FALSE	All cause DALYs	1.06204e+06	1.05827e+06	1.06383e+06	1.08154e+06	1.07632e+06	1.08259e+06	1.07682e+06	1.07259e+06	1.07618e+06	1.06749e+06	1.0507e+06	1.04349e+06	1.04919e+06	1.05565e+06	1.04624e+06	1.03548e+06	1.02327e+06	1.04355e+06	1.02676e+06	1.02131e+06	1.03088e+06	1.04594e+06	1.04826e+06	1.04518e+06	1.03871e+06	1.04484e+06	1.04646e+06	1.05191e+06	1.0554e+06	1.06121e+06
ury	Uruguay	High-middle SDI	FALSE	All cause deaths	29625.9	29632.7	29959.6	30581.7	30379	30856.9	30868.4	30894.8	31624.9	31729.2	31121	31015.2	31462.5	32057.6	32084.2	31696.7	31229.2	32248.9	31285.5	30982.4	31476.4	32635.3	32792.7	32565.5	32375.6	32800.9	32969.6	33305.8	33533.5	33847.3
uzb	Uzbekistan	Middle SDI	TRUE	PM-equivalent emissions	1829.7	1849.94	1479.29	1481.61	1319.29	1182.23	1204.86	1176.42	1179.77	1118.39	1096.22	1117.09	1137.74	1127.65	1132.24	1055.32	1078.88	1076.47	1106.15	1018.9	996.132	969.105	1117.7	1384.21	1277.67	1250.71	1242.64	1343.23	1490.61	1417.34
uzb	Uzbekistan	Middle SDI	TRUE	Fossil/industrial fraction	0.953377	0.952738	0.939488	0.93734	0.925667	0.921163	0.923422	0.920201	0.919018	0.913167	0.90978	0.910219	0.910967	0.909154	0.908556	0.900461	0.90135	0.899552	0.900633	0.890925	0.886789	0.882017	0.896418	0.915596	0.907476	0.904729	0.908266	0.915777	0.924693	0.921163
uzb	Uzbekistan	Middle SDI	TRUE	Air pollution DALYs	845401	865189	900842	952505	996855	1.0271e+06	1.04299e+06	1.02241e+06	1.00607e+06	979831	978081	964406	958234	951964	950964	976255	957167	954619	948919	933360	933277	954656	974160	980284	988031	993898	990710	984553	982693	979303
uzb	Uzbekistan	Middle SDI	TRUE	Air pollution deaths	19460.2	20434.4	21919.4	24024.9	25777.5	26847.5	27667.4	27474.1	27493.4	27228.2	27973	28147.1	28477.5	28660	28744.3	29652.7	28835.2	28572.4	28580.4	28077.2	28122.2	28889.8	29560	29746.3	30025.7	30261	30206.5	30150.2	30204.6	30095.9
uzb	Uzbekistan	Middle SDI	TRUE	All cause DALYs	7.72448e+06	7.87131e+06	8.10774e+06	8.4596e+06	8.75495e+06	8.98771e+06	9.16238e+06	9.13036e+06	9.13427e+06	9.09968e+06	9.23356e+06	9.25316e+06	9.33877e+06	9.43045e+06	9.546e+06	9.78793e+06	9.6629e+06	9.66322e+06	9.60737e+06	9.49869e+06	9.48187e+06	9.59821e+06	9.71418e+06	9.73749e+06	9.78975e+06	9.8662e+06	9.94054e+06	9.9634e+06	1.00111e+07	1.00612e+07
uzb	Uzbekistan	Middle SDI	TRUE	All cause deaths	130872	136178	144342	156232	165744	171804	176999	176758	177942	177783	183679	186321	190633	194485	197784	204495	198921	196856	196094	192600	191928	195281	198007	197711	198633	200241	201495	202155	203349	203599
vut	Vanuatu	Low-middle SDI	FALSE	PM-equivalent emissions	2.4867	2.48176	2.57907	2.66713	2.63395	2.63446	2.79447	2.88217	3.03237	3.06122	3.0875	3.17608	3.19822	3.22795	3.0284	3.09073	3.03796	3.71989	3.44476	3.68289	3.73005	4.10905	4.24323	3.93873	3.96853	4.10919	4.11244	4.18856	4.25306	4.3472
vut	Vanuatu	Low-middle SDI	FALSE	Fossil/industrial fraction	0.67738	0.670513	0.677794	0.676432	0.66528	0.658933	0.664661	0.664129	0.643432	0.649941	0.643637	0.647406	0.642267	0.643911	0.613289	0.60331	0.586431	0.657033	0.636367	0.653348	0.648948	0.695124	0.70513	0.683091	0.683414	0.697843	0.702873	0.709767	0.717847	0.727428
vut	Vanuatu	Low-middle SDI	FALSE	Air pollution DALYs	7825.82	8119.07	8392.33	8604.97	8893.67	8949.7	9173.07	9327.15	9485.33	9852.07	9866.17	10131.2	10062.6	10071.2	10257.5	10752.3	11066.2	11569.7	11909.7	12158.5	12383.6	12742.6	12920.5	13155.5	13400.7	13600.2	13867.3	14032.6	14198.4	14322.5
vut	Vanuatu	Low-middle SDI	FALSE	Air pollution deaths	195.061	203.751	211.604	217.73	225.782	227.235	232.961	236.728	240.678	248.186	247.236	254.255	250.87	250.807	257.176	271.979	283.026	297.32	309.333	318.716	328.055	342.272	351.575	362.151	372.592	382.08	392.312	400.211	408.725	415.965
vut	Vanuatu	Low-middle SDI	FALSE	All cause DALYs	61894.1	62885.3	64212.2	65533.4	66368.8	67659.5	69087.1	77043.6	72073.4	76629.2	75502.2	77463.5	79401.2	81326.7	83473.9	85478.8	87112.5	88799.7	90548.9	92394.1	93663.7	95396	96644.9	98009.8	100160	101712	102805	104434	106063	107730
vut	Vanuatu	Low-middle SDI	FALSE	All cause deaths	1108.58	1133.45	1163.22	1191.08	1208.17	1233.7	1259.71	1386.45	1311.06	1388.28	1374.75	1413.23	1452.86	1494.08	1539.59	1585.2	1625.87	1668.19	1713.65	1762.74	1800.76	1852.39	1892.43	1937.56	1995.4	2044.53	2086.3	2134.05	2184.83	2236.5
ven	Venezuela (Bolivarian Republic of)	Middle SDI	TRUE	PM-equivalent emissions	1327.42	1325.31	1320.05	1301.91	1268.82	1293.66	1304.18	1350.32	1374.66	1348.19	1430.54	1509.64	1480.76	1418.88	1504.71	1597.91	1602.94	1442.84	1695.55	1851.31	1930.19	1794.65	1921.79	1830.5	1790.35	1645.99	1477.48	1352.55	1142.64	969.421
ven	Venezuela (Bolivarian Republic of)	Middle SDI	TRUE	Fossil/industrial fraction	0.783594	0.787663	0.788731	0.773991	0.768603	0.770523	0.769225	0.782056	0.763084	0.765061	0.772929	0.786797	0.774203	0.774066	0.785382	0.789315	0.805805	0.787839	0.838091	0.845846	0.852247	0.840378	0.85028	0.842281	0.838445	0.824923	0.807268	0.790635	0.75242	0.708452
ven	Venezuela (Bolivarian Republic of)	Middle SDI	TRUE	Air pollution DALYs	190053	183573	188324	192549	202471	204450	202897	199787	208785	210723	212669	220042	226050	242639	229659	231443	244756	261936	281759	293245	289046	295937	307742	308192	311478	314645	318535	320869	330671	355981
ven	Venezuela (Bolivarian Republic of)	Middle SDI	TRUE	Air pollution deaths	5261.48	5301.85	5443.35	5590.3	5928.26	5991.21	5933.73	5889.58	6247.36	6436.37	6543.42	6797.6	7105.43	7552.57	7219	7367.42	7902.02	8481.4	9165.5	9516.89	9293.51	9574.84	9993.26	9977.26	10164.5	10364.4	10689.7	10977.3	11486.9	12616.9
ven	Venezuela (Bolivarian Republic of)	Middle SDI	TRUE	All cause DALYs	5.39121e+06	5.22005e+06	5.3955e+06	5.5831e+06	5.88309e+06	5.91037e+06	5.85757e+06	5.76121e+06	5.89949e+06	7.74714e+06	6.11991e+06	6.31818e+06	6.42058e+06	6.82237e+06	6.59082e+06	6.56814e+06	6.73324e+06	6.97791e+06	7.2377e+06	7.40527e+06	7.44754e+06	7.59769e+06	7.87714e+06	8.00135e+06	8.15617e+06	8.2549e+06	8.18118e+06	8.04723e+06	8.07893e+06	8.30916e+06
ven	Venezuela (Bolivarian Republic of)	Middle SDI	TRUE	All cause deaths	88805.1	88221.7	91438.3	95269.2	101888	102276	100531	98782.2	102786	135697	108496	112983	117482	125574	121027	122291	128095	134061	140617	143656	141438	145349	152074	153845	158469	162477	166605	170057	175061	186929
vnm	Viet Nam	Middle SDI	TRUE	PM-equivalent emissions	1065.66	1077.07	1060.02	1107.3	1108.87	1133.01	1190.46	1263.45	1326.54	1340.99	1392.82	1395.74	1467.35	1458.48	1585.1	1563.75	1583.09	1695.03	1646.57	1692.39	1717.42	1651.39	1590.55	1576.79	1641.85	2014.28	2088.45	2084.15	2298.86	2550.65
vnm	Viet Nam	Middle SDI	TRUE	Fossil/industrial fraction	0.456722	0.462049	0.476775	0.501039	0.527845	0.544357	0.552089	0.550314	0.570704	0.574021	0.586099	0.590934	0.603047	0.620375	0.649648	0.645192	0.646513	0.67149	0.663393	0.672979	0.679748	0.668087	0.656263	0.653834	0.668773	0.643841	0.65584	0.660031	0.692989	0.724374
vnm	Viet Nam	Middle SDI	TRUE	Air pollution DALYs	2.60881e+06	2.54367e+06	2.47033e+06	2.39443e+06	2.31918e+06	2.24808e+06	2.18371e+06	2.12694e+06	2.07841e+06	2.04288e+06	2.01542e+06	2.01374e+06	2.01759e+06	2.03677e+06	2.05702e+06	2.06908e+06	2.07693e+06	2.10039e+06	2.12099e+06	2.13438e+06	2.12981e+06	2.11746e+06	2.08986e+06	2.05818e+06	2.02344e+06	1.99205e+06	1.96646e+06	1.94828e+06	1.94416e+06	1.94633e+06
vnm	Viet Nam	Middle SDI	TRUE	Air pollution deaths	72703.5	72049.4	71266.3	70473.7	69740.3	69132.6	68631.8	68300.2	68045.9	68050.5	68231.1	69094.1	70063	71344.4	72580.5	73597.2	74467.2	75756.8	76821.5	77538.2	77631	77528.5	76793.2	75714.5	74502	73330.1	72409.3	71712	71626.3	71701
vnm	Viet Nam	Middle SDI	TRUE	All cause DALYs	2.2377e+07	2.22147e+07	2.19604e+07	2.17287e+07	2.15182e+07	2.13077e+07	2.11819e+07	2.11784e+07	2.08917e+07	2.08275e+07	2.07864e+07	2.0935e+07	2.11257e+07	2.14044e+07	2.17031e+07	2.20082e+07	2.23041e+07	2.26689e+07	2.30286e+07	2.33257e+07	2.35533e+07	2.38288e+07	2.40619e+07	2.43209e+07	2.45493e+07	2.47614e+07	2.50259e+07	2.52832e+07	2.55372e+07	2.58115e+07
vnm	Viet Nam	Middle SDI	TRUE	All cause deaths	432520	431695	429607	428282	427456	426928	428426	432358	431569	434833	438347	445939	454476	465067	476346	487610	498889	511898	524605	535753	544863	555607	565308	575199	584217	592286	602248	612169	622120	631818
yem	Yemen	Low SDI	TRUE	PM-equivalent emissions	135.308	158.375	170.536	129.044	134.49	141.608	145.742	155.457	168.357	188.815	203.162	214.204	211.448	243.834	251.067	263.76	262.272	264.592	274.786	289.177	273.359	240.94	222.356	259.649	239.801	156.141	140.313	137.32	137.249	140.133
yem	Yemen	Low SDI	TRUE	Fossil/industrial fraction	0.967578	0.968685	0.967197	0.951387	0.948696	0.947145	0.944793	0.944684	0.945957	0.949317	0.950027	0.949472	0.945162	0.948893	0.946673	0.945698	0.942635	0.94106	0.941702	0.943241	0.938602	0.92873	0.921072	0.931123	0.923974	0.883075	0.86972	0.866713	0.867001	0.870353
yem	Yemen	Low SDI	TRUE	Air pollution DALYs	1.2493e+06	1.22911e+06	1.21123e+06	1.19558e+06	1.17991e+06	1.15809e+06	1.13989e+06	1.12586e+06	1.10627e+06	1.08908e+06	1.06943e+06	1.04588e+06	1.03478e+06	1.01734e+06	998127	975918	961955	962405	961012	949266	926295	915538	902399	895689	881158	880887	871707	865184	862832	856948
yem	Yemen	Low SDI	TRUE	Air pollution deaths	21222.1	21054.1	20935.7	20844.1	20758.6	20599.3	20461.3	20372.3	20180.7	20096.3	19929.8	19672.8	19601.7	19425.2	19257.5	19091.8	19095.3	19250.6	19452.6	19436	19258.9	19430	19543.2	19756	19819.7	20229.7	20429.1	20696.5	20996	21184.4
yem	Yemen	Low SDI	TRUE	All cause DALYs	1.11751e+07	1.11554e+07	1.11616e+07	1.11694e+07	1.12652e+07	1.11421e+07	1.11538e+07	1.11283e+07	1.11076e+07	1.10377e+07	1.09908e+07	1.09376e+07	1.09012e+07	1.08902e+07	1.08445e+07	1.07663e+07	1.07198e+07	1.07297e+07	1.07311e+07	1.0702e+07	1.06162e+07	1.06691e+07	1.06985e+07	1.04708e+07	1.05329e+07	1.08498e+07	1.14604e+07	1.1736e+07	1.21088e+07	1.16246e+07
yem	Yemen	Low SDI	TRUE	All cause deaths	147166	147324	147895	148441	150243	148996	149594	149644	149853	149319	149099	148865	148828	149136	148919	148293	148106	148706	149086	149140	148547	150218	151600	149230	151394	157376	167865	173263	189408	174542
zmb	Zambia	Low-middle SDI	FALSE	PM-equivalent emissions	2279.65	2191.97	2265.03	2155.95	2017.57	1987.64	2022.72	1996.85	1989.83	1969.11	1983.62	2240.75	2283.05	2091.69	2134.45	2032.36	2144.89	2074.88	2142.73	2301.2	2543.75	2610.72	2586.12	2587.57	2604.82	2832.99	2891.73	2968.9	3024.98	3058.91
zmb	Zambia	Low-middle SDI	FALSE	Fossil/industrial fraction	0.274743	0.250871	0.276223	0.240289	0.20315	0.201906	0.214144	0.203846	0.197586	0.181236	0.172421	0.266393	0.269451	0.195732	0.20263	0.143808	0.185293	0.149962	0.171492	0.229988	0.307705	0.323624	0.314945	0.313405	0.316142	0.369506	0.380413	0.394654	0.406025	0.412755
zmb	Zambia	Low-middle SDI	FALSE	Air pollution DALYs	885278	892421	897681	895066	891709	884969	869245	848901	832586	817024	806394	798159	780209	781023	794326	798013	799538	788798	779297	752469	732653	716257	692654	675279	654236	637870	621872	608663	592360	582907
zmb	Zambia	Low-middle SDI	FALSE	Air pollution deaths	13084	13301.4	13467.2	13531.5	13600.3	13635.3	13552.2	13393.5	13271.6	13140.2	13061.3	12985.6	12833.8	12903.1	13118.8	13211.5	13316.8	13197.4	13108	12828.6	12710.4	12643.7	12441.9	12308.2	12155.3	12073.9	12008.6	11950	11847.7	11826.4
zmb	Zambia	Low-middle SDI	FALSE	All cause DALYs	8.26432e+06	8.73078e+06	9.15297e+06	9.44122e+06	9.81284e+06	1.01844e+07	1.04841e+07	1.0698e+07	1.08914e+07	1.10756e+07	1.11542e+07	1.14801e+07	1.1205e+07	1.11224e+07	1.09289e+07	1.07469e+07	1.05063e+07	1.00679e+07	9.49654e+06	9.07581e+06	8.88917e+06	8.71357e+06	8.49949e+06	8.34445e+06	8.26827e+06	8.23573e+06	8.18583e+06	8.16875e+06	8.06728e+06	7.99776e+06
zmb	Zambia	Low-middle SDI	FALSE	All cause deaths	114049	121681	128959	134757	141738	148695	154536	158959	162950	166503	168501	173141	170334	169150	165796	162583	158640	150799	141108	134971	133088	131023	127885	125711	124839	124603	124351	124850	123943	123355
zwe	Zimbabwe	Low-middle SDI	FALSE	PM-equivalent emissions	534.596	545.35	543.774	534.612	534.537	519.419	520.189	513.647	499.902	525.08	509.948	495.894	481.352	460.722	457.25	473.907	476.731	483.622	468.787	476.868	501.939	516.029	518.597	525.349	523.942	526.91	523.682	524.054	521.283	515.557
zwe	Zimbabwe	Low-middle SDI	FALSE	Fossil/industrial fraction	0.452269	0.458598	0.445837	0.423875	0.413104	0.398409	0.394957	0.385407	0.371146	0.397481	0.373074	0.353554	0.331414	0.296627	0.284789	0.292303	0.274346	0.275363	0.242999	0.248979	0.273671	0.288831	0.286875	0.28634	0.274575	0.268459	0.246434	0.234987	0.231071	0.222677
zwe	Zimbabwe	Low-middle SDI	FALSE	Air pollution DALYs	489196	472665	466098	452610	451240	443785	431675	429799	436516	452351	469271	480307	497922	514384	532856	552756	578853	602909	649371	669074	678179	688830	680000	662942	656330	653411	641920	625386	609545	600330
zwe	Zimbabwe	Low-middle SDI	FALSE	Air pollution deaths	8931.31	8742.1	8756.96	8630.07	8658.19	8664.06	8522.91	8550.15	8804.79	9178.28	9640.29	9880.83	10265.9	10594.2	11006	11307.2	11774.3	12228.9	13063.8	13458.6	13605.4	13647.8	13493.1	13261.2	13227.7	13245.9	13131.1	12925.9	12744.7	12666.9
zwe	Zimbabwe	Low-middle SDI	FALSE	All cause DALYs	5.12023e+06	5.44018e+06	5.90915e+06	6.46531e+06	7.03988e+06	7.69248e+06	8.33979e+06	8.81869e+06	9.43651e+06	9.97127e+06	1.0474e+07	1.07555e+07	1.10471e+07	1.12319e+07	1.13396e+07	1.12611e+07	1.1092e+07	1.08168e+07	1.06819e+07	1.02736e+07	9.45982e+06	8.78185e+06	8.27014e+06	7.95212e+06	7.78691e+06	7.6567e+06	7.51325e+06	7.39582e+06	7.21425e+06	7.19592e+06
zwe	Zimbabwe	Low-middle SDI	FALSE	All cause deaths	78754.3	84419.3	92988.2	103089	113873	126516	138672	148568	161129	172070	182393	188039	193895	197711	200032	198210	194971	190077	186949	179218	165016	152126	143042	137409	134774	133035	131045	129232	126467	126523

## Sheet: Figure1-data-by-SDI-category
SDI_category	var	1990	1991	1992	1993	1994	1995	1996	1997	1998	1999	2000	2001	2002	2003	2004	2005	2006	2007	2008	2009	2010	2011	2012	2013	2014	2015	2016	2017	2018	2019
Low SDI	PM-equivalent emissions	16408.9	16338.7	16420.2	16721.7	17007.1	17272.2	17358.4	17483.5	17607.5	17732.4	17950.9	18098.1	18064.4	17887	18053.1	18207.1	18208.3	18228.5	18411.5	18537.2	18593.7	18967.3	18969.7	19231.7	19441.9	19576.6	19777.1	20139.7	20491.2	20643
Low SDI	Fossil/industrial fraction	0.138396	0.133731	0.126418	0.121588	0.122557	0.125598	0.127526	0.129249	0.13074	0.133684	0.135272	0.138849	0.142496	0.14797	0.154803	0.158833	0.163613	0.168523	0.175083	0.182566	0.190197	0.201039	0.207496	0.210814	0.214404	0.218165	0.221845	0.227893	0.241354	0.247135
Low SDI	Air pollution DALYs	5.23483e+07	5.20467e+07	5.2088e+07	5.20816e+07	5.20277e+07	5.19939e+07	5.17171e+07	5.13916e+07	5.09399e+07	5.04703e+07	5.00004e+07	4.93697e+07	4.88395e+07	4.83663e+07	4.7728e+07	4.73327e+07	4.68038e+07	4.62713e+07	4.5437e+07	4.46651e+07	4.39621e+07	4.3251e+07	4.26485e+07	4.22224e+07	4.18336e+07	4.13135e+07	4.07865e+07	4.00895e+07	3.95722e+07	3.91237e+07
Low SDI	Air pollution deaths	844993	838740	842904	845955	848278	853711	853555	852241	851675	850795	850612	846546	846382	847189	845110	846760	847669	845637	839741	835862	833851	825876	820809	822624	827357	827782	828805	833448	837308	840563
Low SDI	All cause DALYs	4.26056e+08	4.3606e+08	4.286e+08	4.32196e+08	4.71417e+08	4.42038e+08	4.47109e+08	4.48751e+08	450293235	4.51689e+08	4.50332e+08	444677917	4.43243e+08	4.40286e+08	436153071	4.31022e+08	424662363	4.19368e+08	4.13145e+08	4.08811e+08	4.18645e+08	4.00868e+08	3.94827e+08	3.90409e+08	3.87699e+08	3.84602e+08	3.82724e+08	3.79414e+08	3.75993e+08	3.73543e+08
Low SDI	All cause deaths	5.96381e+06	6.11063e+06	6.00607e+06	6.07293e+06	6.68183e+06	6.25612e+06	6.34465e+06	6.38031e+06	6.42548e+06	6.46564e+06	6.4658e+06	6.39678e+06	6.39734e+06	6.37618e+06	6.33371e+06	6.27349e+06	6.19997e+06	6.13436e+06	6.05329e+06	6.00863e+06	6.20079e+06	5.91445e+06	5.83516e+06	5.79635e+06	5.79872e+06	5.77679e+06	5.77841e+06	5.78729e+06	5.79318e+06	5.78892e+06
Low-middle SDI	PM-equivalent emissions	32220.2	32519.1	33459.5	34355.5	35011.6	35875.2	36439.2	37345.7	37074.2	37771.8	38245.3	39058.3	39776	39746.9	40902.9	41794.4	43183.7	44478.6	45771	47328.8	48461.8	49108	50259.9	50800.6	52133.7	52708.6	53426.1	54074.5	54685.9	54556.4
Low-middle SDI	Fossil/industrial fraction	0.480505	0.481584	0.493482	0.496633	0.498919	0.50682	0.512702	0.522355	0.5158	0.515986	0.515704	0.522489	0.51983	0.523469	0.535422	0.53707	0.552407	0.558177	0.563376	0.574323	0.579611	0.577483	0.586505	0.591924	0.603923	0.608985	0.609223	0.613334	0.618258	0.617942
Low-middle SDI	Air pollution DALYs	1.16537e+08	1.1614e+08	1.15893e+08	1.15102e+08	1.1451e+08	1.14027e+08	1.13714e+08	1.14618e+08	1.14133e+08	1.12941e+08	112164675	111338940	1.10469e+08	1.0896e+08	1.06823e+08	1.06142e+08	106259748	1.0587e+08	1.05609e+08	1.04087e+08	1.03245e+08	1.02876e+08	1.02815e+08	1.02484e+08	1.00955e+08	1.00523e+08	9.81658e+07	9.58591e+07	9.49937e+07	9.45469e+07
Low-middle SDI	Air pollution deaths	2.1797e+06	2.19827e+06	2.21174e+06	2.21718e+06	2.22301e+06	2.22446e+06	2.25014e+06	2.3172e+06	2.33249e+06	2.31128e+06	2.31733e+06	2.33853e+06	2.3471e+06	2.32893e+06	2.27691e+06	2.30278e+06	2.35352e+06	2.38755e+06	2.42231e+06	2.39238e+06	2.3894e+06	2.4267e+06	2.47383e+06	2.52171e+06	2.53191e+06	2.55413e+06	2.54263e+06	2.53698e+06	2.57336e+06	2.59851e+06
Low-middle SDI	All cause DALYs	9.20055e+08	926686484	9.32407e+08	9.32437e+08	9.28914e+08	9.3424e+08	9.37377e+08	9.48574e+08	9.55759e+08	955683401	9.55276e+08	956728514	9.53057e+08	9.4632e+08	9.43431e+08	9.48207e+08	9.4382e+08	9.40073e+08	9.43974e+08	9.25678e+08	9.21013e+08	9.18227e+08	9.11873e+08	9.07138e+08	8.97145e+08	893471538	8.81924e+08	8.77033e+08	8.74839e+08	874029646
Low-middle SDI	All cause deaths	1.39367e+07	1.41384e+07	1.4315e+07	1.43604e+07	1.43439e+07	1.44823e+07	1.46138e+07	1.50024e+07	1.52132e+07	1.52096e+07	1.52892e+07	1.54308e+07	1.54565e+07	1.53348e+07	1.51935e+07	1.5404e+07	1.55115e+07	1.55959e+07	1.58269e+07	1.54834e+07	1.54481e+07	1.5567e+07	1.56257e+07	1.57798e+07	1.57651e+07	1.58315e+07	1.5789e+07	1.58705e+07	1.60579e+07	1.61905e+07
Middle SDI	PM-equivalent emissions	37350.1	38404.7	40767.3	41969.7	43379.3	44291.3	43512.5	45319.2	44598.2	43186.6	43235.2	44802	43109	42859.3	43759.3	44499	44332.1	44656.8	45939.1	44876.2	45973.5	46450.7	47670.2	48289.2	48869.3	48242.4	48225.7	48132.5	48492.5	49015.5
Middle SDI	Fossil/industrial fraction	0.638693	0.643595	0.608634	0.602541	0.600468	0.607838	0.631418	0.627406	0.616676	0.618112	0.615719	0.614032	0.638078	0.654299	0.663948	0.657477	0.651922	0.661388	0.677307	0.66955	0.667354	0.671993	0.677437	0.679896	0.683094	0.676641	0.674081	0.674688	0.678074	0.682465
Middle SDI	Air pollution DALYs	2.56894e+07	2.49343e+07	2.4411e+07	2.39224e+07	2.3516e+07	2.31272e+07	2.27853e+07	2.23893e+07	2.21783e+07	2.20428e+07	2.19412e+07	2.17826e+07	2.1789e+07	2.17336e+07	2.1609e+07	2.16865e+07	2.1697e+07	2.16892e+07	2.18626e+07	2.19309e+07	2.18571e+07	2.17212e+07	2.15393e+07	2.12703e+07	2.10033e+07	2.08458e+07	2.05631e+07	2.0297e+07	2.0233e+07	2.02892e+07
Middle SDI	Air pollution deaths	605094	598338	598554	599035	600757	601533	603563	602094	605070	608332	612626	614421	623033	628384	631876	640325	647287	652917	664534	673568	679103	681115	680508	676905	672938	672581	668706	664058	667681	674774
Middle SDI	All cause DALYs	3.30321e+08	3.28794e+08	3.27305e+08	3.26694e+08	3.27715e+08	3.29129e+08	3.30078e+08	3.31628e+08	3.34288e+08	3.38296e+08	3.39896e+08	3.41949e+08	3.46219e+08	349016827	3.62202e+08	3.51643e+08	353243214	352571457	3.54185e+08	354840816	3.53837e+08	3.53502e+08	3.56397e+08	3.57319e+08	3.58672e+08	3.60246e+08	3.64059e+08	3.65346e+08	3.64805e+08	3.66492e+08
Middle SDI	All cause deaths	5.46215e+06	5.482e+06	5.52683e+06	5.58631e+06	5.66873e+06	5.74795e+06	5.8232e+06	5.89162e+06	5.9931e+06	6.11143e+06	6.18853e+06	6.26326e+06	6.41329e+06	6.52512e+06	6.81572e+06	6.68828e+06	6.77592e+06	6.8162e+06	6.92478e+06	7.01917e+06	7.07084e+06	7.11926e+06	7.22441e+06	7.31726e+06	7.43371e+06	7.54487e+06	7.68687e+06	7.78259e+06	7.85063e+06	7.96462e+06
High-middle SDI	PM-equivalent emissions	95391.9	94938	92217.7	92274.9	89831.1	91097.9	90484.3	88638.1	88601.8	86642.5	87990.2	88657	90312	95586.1	102045	108099	111694	112357	109460	105564	103618	107350	106619	101643	95388	90564.5	85416.6	82002.7	81195.6	79986
High-middle SDI	Fossil/industrial fraction	0.873898	0.872264	0.868143	0.858986	0.856545	0.858694	0.859187	0.852615	0.844524	0.844195	0.849556	0.851595	0.855987	0.870321	0.880337	0.88813	0.89141	0.892045	0.898245	0.89146	0.887691	0.892761	0.892642	0.888273	0.880634	0.87546	0.86799	0.862565	0.861784	0.860429
High-middle SDI	Air pollution DALYs	7.39659e+07	7.31716e+07	7.24229e+07	7.17672e+07	7.06489e+07	6.88963e+07	6.69481e+07	6.48206e+07	6.29887e+07	6.23386e+07	6.19605e+07	6.10145e+07	6.05712e+07	6.00469e+07	5.97756e+07	5.88937e+07	5.67573e+07	5.56323e+07	5.54786e+07	5.51314e+07	5.52565e+07	54879114	5.43467e+07	5.38632e+07	5.35415e+07	5.36785e+07	5.31537e+07	5.20801e+07	5.16332e+07	5.18581e+07
High-middle SDI	Air pollution deaths	2.35884e+06	2.36204e+06	2.37728e+06	2.40231e+06	2.39949e+06	2.37445e+06	2.34822e+06	2.31228e+06	2.27914e+06	2.30019e+06	2.3291e+06	2.33477e+06	2.35531e+06	2.36943e+06	2.38782e+06	2.37298e+06	2.29364e+06	2.2605e+06	2.27518e+06	2.28515e+06	2.31245e+06	2.3013e+06	2.27142e+06	2.25211e+06	2.24332e+06	2.249e+06	2.24063e+06	2.21057e+06	2.19994e+06	2.22433e+06
High-middle SDI	All cause DALYs	618001198	6.14958e+08	6.15956e+08	6.21291e+08	6.24401e+08	6.19091e+08	6.08259e+08	5.96984e+08	5.90397e+08	594315292	5.94267e+08	5.90927e+08	5.89985e+08	591310410	5.90227e+08	5.90146e+08	576898553	5.70753e+08	5.75342e+08	5.68113e+08	5.69696e+08	5.65883e+08	5.64047e+08	563157161	5.65907e+08	5.70309e+08	5.74437e+08	5.75277e+08	5.79462e+08	5.85352e+08
High-middle SDI	All cause deaths	1.30896e+07	1.31808e+07	1.33984e+07	1.37883e+07	1.40121e+07	1.39773e+07	1.38281e+07	1.36656e+07	1.36098e+07	1.39261e+07	1.41636e+07	1.42826e+07	1.4501e+07	1.47207e+07	1.48551e+07	1.49828e+07	1.46014e+07	1.45049e+07	1.47478e+07	1.47428e+07	1.49826e+07	1.49423e+07	1.4913e+07	1.49383e+07	1.5086e+07	1.52909e+07	1.55147e+07	1.56344e+07	1.58663e+07	1.62034e+07
High SDI	PM-equivalent emissions	104351	101245	99016.9	96289.3	93683.7	89264	87680.1	86651	85156	82246.6	80658.2	78071.6	76024.2	74696.7	74704.2	74184.6	72385.5	70141.7	65329.4	60353.9	59522.8	57413.6	53723.6	51904.4	50187.4	48684.9	48101.4	47301.2	46402.2	44932.8
High SDI	Fossil/industrial fraction	0.929913	0.925708	0.923955	0.923279	0.921243	0.918957	0.916885	0.913795	0.911629	0.906148	0.904619	0.901992	0.898573	0.89933	0.900906	0.898961	0.894966	0.893159	0.884328	0.873645	0.863195	0.860012	0.850305	0.843469	0.838975	0.834329	0.833423	0.830893	0.828444	0.823633
High SDI	Air pollution DALYs	1.11485e+07	1.0986e+07	1.07044e+07	1.05402e+07	1.0364e+07	1.02411e+07	9.97894e+06	9.76017e+06	9.60033e+06	9.45526e+06	9.18318e+06	8.96822e+06	8.81646e+06	8.64817e+06	8.37908e+06	8.25037e+06	8.09938e+06	7.97099e+06	7.82599e+06	7.67603e+06	7.51311e+06	7.41682e+06	7.26883e+06	7.08343e+06	6.87365e+06	6.78695e+06	6.5684e+06	6.45155e+06	6.56317e+06	6.65969e+06
High SDI	Air pollution deaths	495152	489372	478508	474508	468071	465249	454853	445695	439755	434103	421088	410712	404845	396921	382538	376519	369082	363198	356713	349944	343325	340836	336083	328341	319032	316882	307137	302516	310586	316808
High SDI	All cause DALYs	2.89096e+08	2.90128e+08	2.89834e+08	2.91208e+08	2.91859e+08	2.93e+08	2.91461e+08	2.90162e+08	2.91039e+08	2.92546e+08	2.92244e+08	292988189	2.94073e+08	2.9559e+08	2.94896e+08	2.96863e+08	2.97453e+08	2.98939e+08	3.00448e+08	3.01389e+08	3.02004e+08	3.04458e+08	3.0602e+08	3.07915e+08	3.09875e+08	3.14076e+08	3.17335e+08	3.2018e+08	324625077	3.28922e+08
High SDI	All cause deaths	8.03464e+06	8.09257e+06	8.10897e+06	8.2112e+06	8.25492e+06	8.34949e+06	8.32937e+06	8.3108e+06	8.37506e+06	8.45887e+06	8.4392e+06	8.45503e+06	8.51556e+06	8.57309e+06	8.50424e+06	8.58403e+06	8.59491e+06	8.65592e+06	8.73281e+06	8.7706e+06	8.82503e+06	8.97185e+06	9.07941e+06	9.17406e+06	9.25797e+06	9.47817e+06	9.60337e+06	9.72445e+06	9.97392e+06	1.02044e+07
